# Supplementary material for: Synergetic copper/TEMPO-catalysed benzylic C–H imidation with N-fluorobenzenesulfonimide at room temperature and tandem conversions with alcohols or arenes
Source: Royal Society of Chemistry journal article supplement (doi:10.1039/d1qo00340b), 2021-01-01

Electronic Supplementary Information (ESI) for:

**Synergic Copper/TEMPO-Catalysed Benzylic C-H Imidation with  
N-Fluorobenzenesulfonimide at Room Temperature and Tandem  
Conversions with Alcohols or Arenes**

*Zhong Shao,<sup>†</sup> Fang Wang,<sup>†</sup> Jingqi Shi,<sup>†</sup> Lifang Ma,<sup>†</sup> and Ziyuan Li\*<sup>†</sup>*

<sup>†</sup> Department of Pharmaceutical and Biological Engineering, School of Chemical Engineering, Sichuan University, No.24 South Section 1, Yihuan Road, Chengdu 610065, China

**Table of Contents**

|                                                                   |          |
|-------------------------------------------------------------------|----------|
| General Remarks                                                   | S2       |
| Preparation and <sup>1</sup> H-NMR data of Substrate <b>1a-1k</b> | S3-S5    |
| Experimental Procedure and Characterization Data                  | S6-S36   |
| Control Experiments                                               | S37-S45  |
| <sup>1</sup> H NMR and <sup>13</sup> C NMR Spectra                | S46-S161 |

## General Remarks

All commercially available compounds were purchased from Sigma-Aldrich, TCI, Acros, J&K Chemicals and Adamas-beta. CuCl (99.99%, trace metal basis, extra pure, CAS No. 7758-89-6) were purchased from Acros. TEMPO was purchased from TCI (98.0% purity, CAS No. 2564-83-2). *N*-Fluorobenzenesulfonimide (NFSI) (97.0% purity, CAS No. 133745-75-2), ethyl acetate (EtOAc) (99.8%, SafeDry, water < 50 ppm), 1,4-dioxane (99.7%, SafeDry, water < 50 ppm), acetonitrile (MeCN) (99.9%, SafeDry, water < 50 ppm), 1,2-dichloroethane (DCE) (99.5%, SafeDry, water < 50 ppm) and THF (99.8%, SafeDry, water < 50 ppm) was purchased from Adamas-beta. Unless otherwise noted, materials obtained from commercial suppliers were used without further purification. Carbamate substrates **2** were prepared through base-mediated condensation reactions between corresponding alcohols and isocyanates,<sup>[1]</sup> or between corresponding anilines and chloroformates,<sup>[2]</sup> according to literature reported methods.<sup>[1-2]</sup> Products were purified by flash chromatography on silica gel using petroleum ether, ethyl acetate and dichloromethane as the eluents. <sup>1</sup>H-NMR spectra were recorded on Bruker AVANCE III-400 spectrometers. Chemical shifts (in ppm) were referenced with TMS in CDCl<sub>3</sub> (0 ppm); s = singlet, d = doublet, t = triplet, q = quartet, p = pentad, se = sextet, h = heptet, o = octet. <sup>13</sup>C-NMR spectra were obtained by using the same NMR spectrometers and were calibrated with CDCl<sub>3</sub> ( $\delta$  = 77.00 ppm). High resolution mass spectra were obtained from an Agilent 6520B Q-TOF mass spectrometer with electron spray ionization (ESI) as the ion source.

## Preparation and <sup>1</sup>H-NMR data of Substrate 1a-1k

### 1) Preparation and <sup>1</sup>H-NMR data of 1a-1f and 1j-1k

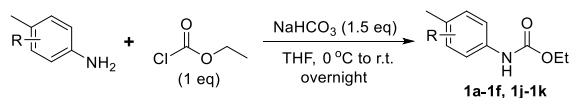

**Typical Procedure:** To a solution of corresponding aniline (10 mmol) in THF (20 mL) was added sodium bicarbonate (15 mmol, 1.5 eq) at 0 °C. After stirring for 15 minutes, ethyl chloroformate (10 mmol, 1 eq) was added slowly at 0 °C, and the mixture was stirred at room temperature overnight. Then the reaction was quenched with saturated NH<sub>4</sub>Cl (aq.), extracted with ethyl acetate, washed with water, and dried over Na<sub>2</sub>SO<sub>4</sub>. After removal of Na<sub>2</sub>SO<sub>4</sub> by filtration, the organic phase was concentrated *in vacuo*, and purified by flash chromatography on silica gel using petroleum ether and ethyl acetate as the eluent to afford corresponding substrate **1a-1f** and **1j-1k**.

#### **Ethyl *p*-tolylcarbamate (1a)**

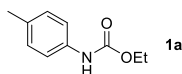

**<sup>1</sup>H NMR (CDCl<sub>3</sub>, 400 MHz):** δ = 7.25 (d, *J* = 8.5 Hz, 2H), 7.09 (d, *J* = 8.5 Hz, 2H), 6.64 (s, 1H), 4.21 (q, *J* = 7.1 Hz, 2H), 2.29 (s, 3H), 1.29 (t, *J* = 7.1 Hz, 3H) ppm.

#### **Ethyl (3,4-dimethylphenyl)carbamate (1b)**

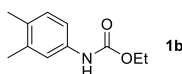

**<sup>1</sup>H NMR (CDCl<sub>3</sub>, 400 MHz):** δ = 7.15 (s, 1H), 7.11 (d, *J* = 8.3 Hz, 1H), 6.99 (d, *J* = 8.3 Hz, 1H), 6.94 (s, 1H), 4.19 (q, *J* = 7.1 Hz, 2H), 2.17 (s, 3H), 2.16 (s, 3H), 1.26 (t, *J* = 7.1 Hz, 3H) ppm.

#### **Ethyl (2-methoxy-4-methylphenyl)carbamate (1c)**

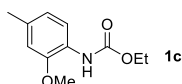

**<sup>1</sup>H NMR (CDCl<sub>3</sub>, 400 MHz):** δ = 7.92 (d, *J* = 8.1 Hz, 1H), 7.10 (s, 1H), 6.74 (dd, *J* = 8.1 Hz, 1.9 Hz, 1H), 6.65 (d, *J* = 1.9 Hz, 1H), 4.20 (q, *J* = 7.1 Hz, 2H), 3.81 (s, 3H), 2.30 (s, 3H), 1.26 (t, *J* = 7.1 Hz, 3H) ppm.

### Ethyl (2,4-dimethylphenyl)carbamate (1d)

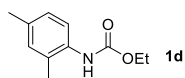

$^1\text{H NMR}$  ( $\text{CDCl}_3$ , 400 MHz):  $\delta = 7.56$  (s, 1H), 6.98 (d,  $J = 7.9$  Hz, 1H), 6.96 (s, 1H), 6.33 (s, 1H), 4.20 (q,  $J = 7.1$  Hz, 2H), 2.27 (s, 3H), 2.20 (s, 3H), 1.29 (t,  $J = 7.1$  Hz, 3H) ppm.

### Ethyl (3-fluoro-4-methylphenyl)carbamate (1e)

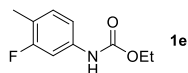

$^1\text{H NMR}$  ( $\text{CDCl}_3$ , 400 MHz):  $\delta = 7.26$ -7.23 (m, 1H), 7.05 (t,  $J = 8.3$  Hz, 1H), 6.93 (dd,  $J = 8.3$  Hz, 2.2 Hz, 1H), 6.77 (s, 1H), 4.21 (q,  $J = 7.1$  Hz, 2H), 2.20 (s, 3H), 1.29 (t,  $J = 7.1$  Hz, 3H) ppm.

### Ethyl (3-iodo-4-methylphenyl)carbamate (1f)

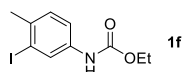

$^1\text{H NMR}$  ( $\text{CDCl}_3$ , 400 MHz):  $\delta = 7.85$  (d,  $J = 2.4$  Hz, 1H), 7.27 (dd,  $J = 8.2$  Hz, 2.4 Hz, 1H), 7.12 (d,  $J = 8.2$  Hz, 1H), 6.63 (s, 1H), 4.21 (q,  $J = 7.1$  Hz, 2H), 2.36 (s, 3H), 1.30 (t,  $J = 7.1$  Hz, 3H) ppm.

### Butyl *p*-tolylcarbamate (1j)

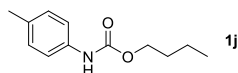

$^1\text{H NMR}$  ( $\text{CDCl}_3$ , 400 MHz):  $\delta = 7.26$  (d,  $J = 8.0$  Hz, 2H), 7.07 (d,  $J = 8.0$  Hz, 2H), 6.82 (s, 1H), 4.14 (t,  $J = 6.7$  Hz, 2H), 2.28 (s, 3H), 1.63 (p,  $J = 7.1$  Hz, 2H), 1.39 (se,  $J = 7.4$  Hz, 2H), 0.93 (t,  $J = 7.4$  Hz, 3H) ppm.

### Phenyl *p*-tolylcarbamate (1k)

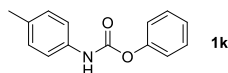

$^1\text{H NMR}$  ( $\text{CDCl}_3$ , 400 MHz):  $\delta = 7.37$  (t,  $J = 7.9$  Hz, 2H), 7.31 (d,  $J = 8.0$  Hz, 2H), 7.23 (d,  $J = 7.8$  Hz, 1H), 7.18 (d,  $J = 7.8$  Hz, 2H), 7.11 (d,  $J = 8.3$  Hz, 2H), 6.92 (s, 1H), 2.31 (s, 3H) ppm.

## 2) Preparation and $^1\text{H-NMR}$ data of 1g-1i

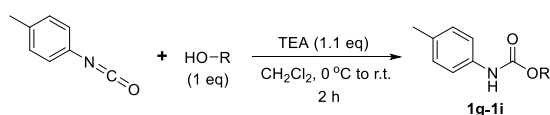

**Typical Procedure:** To a solution of 1-isocyanato-4-methylbenzene (5 mmol) and Et<sub>3</sub>N (5.5 mmol, 1.1 eq) in CH<sub>2</sub>Cl<sub>2</sub> (25 mL) was added corresponding alcohol (5 mmol, 1 eq) slowly at 0 °C, and the mixture was stirred at room temperature for 2 hours. Then the reaction was quenched with saturated NH<sub>4</sub>Cl (aq.), extracted with ethyl acetate, washed with water, and dried over Na<sub>2</sub>SO<sub>4</sub>. After removal of Na<sub>2</sub>SO<sub>4</sub> by filtration, the organic phase was concentrated *in vacuo*, and purified by flash chromatography on silica gel using petroleum ether and ethyl acetate as the eluent to afford corresponding substrate **1g-1i**.

**Propyl *p*-tolylcarbamate (1g)**

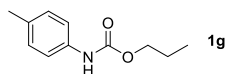

**<sup>1</sup>H NMR (CDCl<sub>3</sub>, 400 MHz):** δ = 7.46-7.45 (m, 2H), 7.15-7.07 (m, 2H), 6.77 (s, 1H), 4.11 (t, *J* = 6.7 Hz, 2H), 2.30 (s, 3H), 1.68 (se, *J* = 7.1 Hz, 2H), 0.96 (t, *J* = 7.4 Hz, 3H) ppm.

**Isopropyl *p*-tolylcarbamate (1h)**

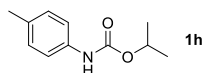

**<sup>1</sup>H NMR (CDCl<sub>3</sub>, 400 MHz):** δ = 7.25 (d, *J* = 8.1 Hz, 2H), 7.07 (d, *J* = 8.1 Hz, 2H), 6.66 (s, 1H), 5.01 (h, *J* = 6.3 Hz, 1H), 2.28 (s, 3H), 1.27 (d, *J* = 6.3 Hz, 6H) ppm.

**Tert-Pentyl *p*-tolylcarbamate (1i)**

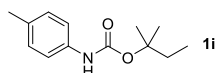

**<sup>1</sup>H NMR (CDCl<sub>3</sub>, 400 MHz):** δ = 7.23 (d, *J* = 8.2 Hz, 2H), 7.08 (d, *J* = 8.2 Hz, 2H), 6.43 (s, 1H), 2.28 (s, 3H), 1.83 (q, *J* = 7.5 Hz, 2H), 1.48 (s, 6H), 0.92 (t, *J* = 7.5 Hz, 3H) ppm.

## Experimental Procedure and Characterization Data

### 1) Synergic copper/TEMPO-catalysed benzylic C-H imidation of *p*-tolylcarbamates

#### (Table 3)

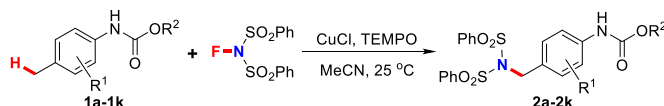

**Typical Procedure:** To a reaction tube charged with CuCl (1.5 mg, 0.015 mmol) and NFSI (189 mg, 0.6 mmol) was added a solution of *p*-tolylcarbamate (**1a-1k**, 0.3 mmol) and TEMPO (4.7 mg, 0.03 mmol) in anhydrous acetonitrile (2 mL) under argon (1 atm). After stirring at 25°C for 12 hours, the mixture was concentrated *in vacuo* to give dark residue, which was purified by flash chromatography on silica gel using petroleum ether and ethyl acetate as the eluent to afford corresponding benzylic imidated products **2a-2k**.

#### **Ethyl 4-((*N*-(phenylsulfonyl)phenylsulfonamido)methyl)phenylcarbamate (**2a**)**

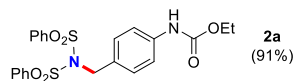

The reaction of 0.3 mmol of ethyl *p*-tolylcarbamate (53.7 mg, **1a**) and NFSI (189 mg) with CuCl (1.5mg) and TEMPO (4.7 mg) at 25 °C in argon afforded 129.6 mg of **2a** (91%) after flash chromatography on silica gel using petroleum ether and ethyl acetate (6:1 to 3:1, *v/v*) as the eluent.

White solid, m.p. 148.0-148.6 °C.  $^1\text{H NMR}$  ( $\text{CDCl}_3$ , 400 MHz):  $\delta$  = 7.80-7.78 (m, 4H), 7.57-7.53 (m, 2H), 7.43-7.39 (m, 4H), 7.30-7.24 (m, 4H), 6.87 (s, 1H), 4.88 (s, 2H), 4.21 (q,  $J$  = 7.1 Hz, 2H), 1.29 (t,  $J$  = 7.1 Hz, 3H) ppm.  $^{13}\text{C NMR}$  ( $\text{CDCl}_3$ , 100 MHz):  $\delta$  = 153.30, 139.71, 137.77, 133.44, 129.85, 128.98, 128.63, 127.83, 118.19, 61.07, 51.80, 14.34 ppm. **HRMS  $m/z$  (ESI)** calcd for  $[\text{C}_{22}\text{H}_{22}\text{N}_2\text{O}_6\text{S}_2+\text{Na}]^+$  497.0812, found 497.0816.

#### **Ethyl 3-methyl-4-((*N*-(phenylsulfonyl)phenylsulfonamido)methyl)phenylcarbamate (**2b**)**

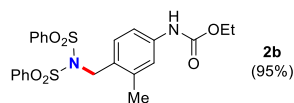

The reaction of 0.3 mmol of ethyl (3,4-dimethylphenyl)carbamate (57.9 mg, **1b**) and NFSI (189 mg) with CuCl (1.5mg) and TEMPO (4.7 mg) at 25 °C in argon afforded 139.6 mg of **2b** (95%) after flash

chromatography on silica gel using petroleum ether and ethyl acetate (6:1 to 3:1, v/v) as the eluent.

Light yellow solid, m.p. 148.2-148.5 °C.  $^1\text{H NMR}$  ( $\text{CDCl}_3$ , 400 MHz):  $\delta$  = 7.81-7.79 (m, 4H), 7.58-7.55 (m, 2H), 7.45-7.41 (m, 4H), 7.13 (d,  $J$  = 8.4 Hz, 2H), 6.89 (dd,  $J$  = 8.4 Hz, 1.9 Hz, 1H), 6.62 (s, 1H), 4.97 (s, 2H), 4.22 (q,  $J$  = 7.1 Hz, 2H), 2.26 (s, 3H), 1.30 (t,  $J$  = 7.1 Hz, 3H) ppm.  $^{13}\text{C NMR}$  ( $\text{CDCl}_3$ , 100 MHz):  $\delta$  = 153.46, 139.96, 137.56, 137.52, 133.54, 130.24, 128.73, 127.95, 126.92, 120.05, 116.07, 61.19, 49.80, 19.27, 14.48 ppm. **HRMS  $m/z$  (ESI)** calcd for  $[\text{C}_{23}\text{H}_{24}\text{N}_2\text{O}_6\text{S}_2+\text{Na}]^+$  511.0968, found 511.0964.

### Ethyl (2-methoxy-4-((*N*-(phenylsulfonyl)phenylsulfonamido)methyl)phenyl)carbamate (**2c**)

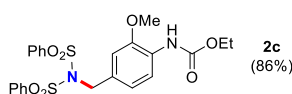

The reaction of 0.3 mmol of ethyl (2-methoxy-4-methylphenyl)carbamate (62.7 mg, **1c**) and NFSI (189 mg) with CuCl (1.5mg) and TEMPO (4.7 mg) at 25 °C in argon afforded 129.8 mg of **2c** (86%) after flash chromatography on silica gel using petroleum ether and ethyl acetate (6:1 to 3:1, v/v) as the eluent.

Light yellow solid, m.p. 96.9-97.7 °C.  $^1\text{H NMR}$  ( $\text{CDCl}_3$ , 400 MHz):  $\delta$  = 7.99 (d,  $J$  = 8.2 Hz, 1H), 7.82-7.80 (m, 4H), 7.58-7.55 (m, 2H), 7.45-7.41 (m, 4H), 7.18 (s, 1H), 6.94 (dd,  $J$  = 8.2 Hz, 1.5 Hz, 1H), 6.80 (d,  $J$  = 1.5 Hz, 1H), 4.90 (s, 2H), 4.24 (q,  $J$  = 7.1 Hz, 2H), 3.61 (s, 3H), 1.33 (t,  $J$  = 7.1 Hz, 3H) ppm.  $^{13}\text{C NMR}$  ( $\text{CDCl}_3$ , 100 MHz):  $\delta$  = 153.24, 147.27, 139.83, 133.41, 128.60, 128.43, 127.88, 127.42, 121.91, 117.22, 110.14, 61.03, 55.32, 52.35, 15.39 ppm. **HRMS  $m/z$  (ESI)** calcd for  $[\text{C}_{23}\text{H}_{24}\text{N}_2\text{O}_7\text{S}_2+\text{Na}]^+$  527.0917, found 527.0912.

### Ethyl (2-methyl-4-((*N*-(phenylsulfonyl)phenylsulfonamido)methyl)phenyl)carbamate (**2d**)

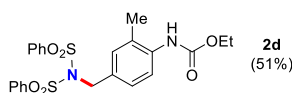

The reaction of 0.3 mmol of ethyl (2,4-dimethylphenyl)carbamate (57.9 mg, **1d**) and NFSI (189 mg) with CuCl (1.5mg) and TEMPO (4.7 mg) at 25 °C in argon afforded 74.9 mg of **2d** (51%) after flash chromatography on silica gel using petroleum ether and ethyl acetate (6:1 to 3:1, v/v) as the eluent.

White solid, m.p. 112.4-113.0 °C.  $^1\text{H NMR}$  ( $\text{CDCl}_3$ , 400 MHz):  $\delta$  = 7.81-7.79 (m, 4H), 7.71-7.70 (m, 1H), 7.59-7.56 (m, 2H), 7.46-7.42 (m, 4H), 7.19 (dd,  $J$  = 8.3 Hz, 1.6 Hz, 1H), 7.07 (s, 1H), 6.37 (s, 1H), 4.88 (s, 2H), 4.25 (q,  $J$  = 7.1 Hz, 2H), 2.10 (s, 3H), 1.34 (t,  $J$  = 7.1 Hz, 3H) ppm.  $^{13}\text{C NMR}$  ( $\text{CDCl}_3$ , 100 MHz):  $\delta$  = 153.68, 139.94, 135.80, 133.54, 130.93, 129.65, 128.74, 128.03, 127.77, 61.34, 52.09, 17.43, 14.52 ppm. **HRMS  $m/z$  (ESI)** calcd for  $[\text{C}_{23}\text{H}_{24}\text{N}_2\text{O}_7\text{S}_2+\text{Na}]^+$  511.0968, found 511.0969.

### Ethyl (3-fluoro-4-((N-(phenylsulfonyl)phenylsulfonamido)methyl)phenyl)carbamate (**2e**)

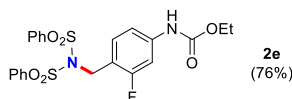

The reaction of 0.3 mmol of ethyl (3-fluoro-4-methylphenyl)carbamate (59.1 mg, **1e**) and NFSI (189 mg) with CuCl (1.5mg) and TEMPO (4.7 mg) at 25 °C in argon afforded 111.6 mg of **2e** (76%) after flash chromatography on silica gel using petroleum ether and ethyl acetate (6:1 to 3:1, v/v) as the eluent.

White solid, m.p. 83.6-84.5 °C. <sup>1</sup>H NMR (CDCl<sub>3</sub>, 400 MHz): δ = 7.87-7.85 (m, 4H), 7.61-7.57 (m, 2H), 7.48-7.44 (m, 4H), 7.33-7.30 (m, 1H), 7.17 (t, *J* = 8.0 Hz, 1H), 6.74-6.72 (m, 2H), 5.00 (s, 2H), 4.22 (q, *J* = 7.1 Hz, 2H), 1.31 (t, *J* = 7.1 Hz, 3H) ppm. <sup>13</sup>C NMR (CDCl<sub>3</sub>, 100 MHz): δ = 160.63 (d, *J* = 245.5 Hz), 153.21, 139.64, 139.43 (d, *J* = 11.2 Hz), 133.76, 130.62 (d, *J* = 4.5 Hz), 128.44 (d, *J* = 84.6 Hz), 127.58, 116.10 (d, *J* = 13.9 Hz), 113.69, 105.49 (d, *J* = 28.9 Hz), 61.49, 45.38 (d, *J* = 4.1 Hz), 14.42 ppm. HRMS *m/z* (ESI) calcd for [C<sub>22</sub>H<sub>21</sub>FN<sub>2</sub>O<sub>6</sub>S<sub>2</sub>+Na]<sup>+</sup> 515.0717, found 515.0716.

### Ethyl (3-iodo-4-((N-(phenylsulfonyl)phenylsulfonamido)methyl)phenyl)carbamate (**2f**)

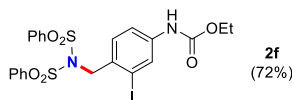

The reaction of 0.3 mmol of ethyl (3-iodo-4-methylphenyl)carbamate (91.5 mg, **1f**) and NFSI (189 mg) with CuCl (1.5mg) and TEMPO (4.7 mg) at 25 °C in argon afforded 129.1 mg of **2f** (72%) after flash chromatography on silica gel using petroleum ether and ethyl acetate (6:1 to 3:1, v/v) as the eluent.

White solid, m.p. 144.8-145.0 °C. <sup>1</sup>H NMR (CDCl<sub>3</sub>, 400 MHz): δ = 7.98 (s, 1H), 7.90-7.88 (m, 4H), 7.63-7.59 (m, 2H), 7.49-7.45 (m, 4H), 7.01 (d, *J* = 7.7 Hz, 1H), 6.93 (d, *J* = 8.1 Hz, 1H), 6.68 (s, 1H), 5.00 (s, 2H), 4.21 (q, *J* = 7.1 Hz, 2H), 1.29 (t, *J* = 7.1 Hz, 3H) ppm. <sup>13</sup>C NMR (CDCl<sub>3</sub>, 100 MHz): δ = 153.27, 139.35, 138.09, 133.79, 131.00, 128.81, 128.63, 128.51, 128.12, 118.08, 97.44, 61.33, 56.68, 14.34 ppm. HRMS *m/z* (ESI) calcd for [C<sub>22</sub>H<sub>21</sub>IN<sub>2</sub>O<sub>6</sub>S<sub>2</sub>+Na]<sup>+</sup> 622.9778, found 622.9777.

### Propyl (4-((N-(phenylsulfonyl)phenylsulfonamido)methyl)phenyl)carbamate (**2g**)

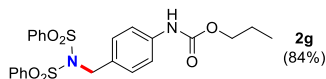

The reaction of 0.3 mmol of propyl *p*-tolylcarbamate (57.9 mg, **1g**) and NFSI (189 mg) with CuCl (1.5mg)



and TEMPO (4.7 mg) at 25 °C in argon afforded 123.13 mg of **2g** (84%) after flash chromatography on silica gel using petroleum ether and ethyl acetate (6:1 to 3:1, v/v) as the eluent.

White solid, m.p. 109.9-110.6 °C. <sup>1</sup>H NMR (CDCl<sub>3</sub>, 400 MHz): δ = 7.80-7.78 (m, 4H), 7.57-7.54 (m, 2H), 7.43-7.40 (m, 4H), 7.29-7.25 (m, 4H), 4.88 (s, 2H), 4.12 (t, *J* = 6.6 Hz, 2H), 1.69 (se, *J* = 7.1 Hz, 2H), 0.97 (t, *J* = 7.4 Hz, 3H) ppm. <sup>13</sup>C NMR (CDCl<sub>3</sub>, 100 MHz): δ = 153.30, 139.53, 137.67, 133.30, 129.66, 128.77, 128.47, 127.65, 118.08, 66.52, 51.65, 21.87, 10.01 ppm. HRMS *m/z* (ESI) calcd for [C<sub>23</sub>H<sub>24</sub>N<sub>2</sub>O<sub>6</sub>S<sub>2</sub>+Na]<sup>+</sup> 511.0968, found 511.0970.

#### Isopropyl 4-((*N*-(phenylsulfonyl)phenylsulfonamido)methyl)phenyl)carbamate (**2h**)

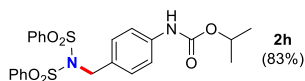

The reaction of 0.3 mmol of isopropyl *p*-tolylcarbamate (57.9 mg, **1h**) and NFSI (189 mg) with CuCl (1.5mg) and TEMPO (4.7 mg) at 25 °C in argon afforded 121.3 mg of **2h** (83%) after flash chromatography on silica gel using petroleum ether and ethyl acetate (6:1 to 3:1, v/v) as the eluent.

White solid, m.p. 107.8-109.1 °C. <sup>1</sup>H NMR (CDCl<sub>3</sub>, 400 MHz): δ = 7.80-7.78 (m, 4H), 7.58-7.54 (m, 2H), 7.44-7.40 (m, 4H), 7.31-7.24 (m, 4H), 6.77 (s, 1H), 5.02 (h, *J* = 6.2 Hz, 1H), 4.88 (s, 2H), 1.30 (d, *J* = 6.2 Hz, 6H) ppm. <sup>13</sup>C NMR (CDCl<sub>3</sub>, 100 MHz): δ = 153.00, 139.80, 138.02, 133.52, 129.92, 128.93, 128.71, 127.92, 118.18, 68.69, 51.89, 21.98 ppm. HRMS *m/z* (ESI) calcd for [C<sub>23</sub>H<sub>24</sub>N<sub>2</sub>O<sub>6</sub>S<sub>2</sub>+Na]<sup>+</sup> 511.0968, found 511.0961.

#### *Tert*-Pentyl 4-((*N*-(phenylsulfonyl)phenylsulfonamido)methyl)phenyl)carbamate (**2i**)

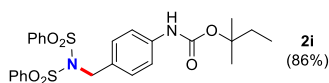

The reaction of 0.3 mmol of *tert*-pentyl *p*-tolylcarbamate (66.3 mg, **1i**) and NFSI (189 mg) with CuCl (1.5mg) and TEMPO (4.7 mg) at 25 °C in argon afforded 133.5 mg of **2i** (86%) after flash chromatography on silica gel using petroleum ether and ethyl acetate (6:1 to 3:1, v/v) as the eluent.

White solid, m.p. 70.1-70.9 °C. <sup>1</sup>H NMR (CDCl<sub>3</sub>, 400 MHz): δ = 7.82-7.80 (m, 4H), 7.58-7.55 (m, 2H), 7.45-7.41 (m, 4H), 7.30-7.22 (m, 4H), 6.63 (s, 1H), 4.88 (s, 2H), 1.85 (q, *J* = 7.5 Hz, 2H), 1.50 (s, 6H), 0.94 (t, *J* = 7.5 Hz, 3H) ppm. <sup>13</sup>C NMR (CDCl<sub>3</sub>, 100 MHz): δ = 152.48, 139.92, 138.36, 133.51, 129.92, 128.73, 127.96, 118.12, 83.03, 51.95, 33.54, 25.69, 8.22 ppm. HRMS *m/z* (ESI) calcd for [C<sub>25</sub>H<sub>28</sub>N<sub>2</sub>O<sub>6</sub>S<sub>2</sub>+Na]<sup>+</sup> 539.1281, found 539.1281.

### Butyl 4-((*N*-(phenylsulfonyl)phenylsulfonamido)methyl)phenylcarbamate (**2j**)

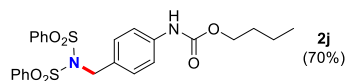

The reaction of 0.3 mmol of butyl *p*-tolylcarbamate (62.1 mg, **1j**) and NFSI (189 mg) with CuCl (1.5mg) and TEMPO (4.7 mg) at 25 °C in argon afforded 104.8 mg of **2j** (70%) after flash chromatography on silica gel using petroleum ether and ethyl acetate (6:1 to 3:1, *v/v*) as the eluent.

White solid, m.p. 68.8-69.3 °C. <sup>1</sup>H NMR (CDCl<sub>3</sub>, 400 MHz): δ = 7.80-7.78 (m, 4H), 7.57-7.54 (m, 2H), 7.44-7.40 (m, 4H), 7.31-7.23 (m, 4H), 6.76 (s, 1H), 4.88 (s, 2H), 4.17 (t, *J* = 6.7 Hz, 2H), 1.65 (p, *J* = 7.1 Hz, 2H), 1.41 (se, *J* = 7.4 Hz, 2H), 0.95 (t, *J* = 7.4 Hz, 3H) ppm. <sup>13</sup>C NMR (CDCl<sub>3</sub>, 100 MHz): δ = 153.55, 139.91, 137.96, 133.55, 129.97, 129.14, 128.75, 127.97, 118.29, 65.11, 51.94, 30.86, 18.99, 13.65 ppm. HRMS *m/z* (ESI) calcd for [C<sub>24</sub>H<sub>26</sub>N<sub>2</sub>O<sub>6</sub>S<sub>2</sub>+Na]<sup>+</sup> 525.1125, found 525.1124.

### Phenyl 4-((*N*-(phenylsulfonyl)phenylsulfonamido)methyl)phenylcarbamate (**2k**)

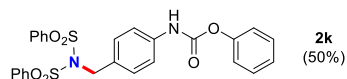

The reaction of 0.3 mmol of phenyl *p*-tolylcarbamate (68.1 mg, **1k**) and NFSI (189 mg) with CuCl (1.5mg) and TEMPO (4.7 mg) at 25 °C in argon afforded 77.8 mg of **2k** (50%) after flash chromatography on silica gel using petroleum ether and ethyl acetate (6:1 to 3:1, *v/v*) as the eluent.

White solid, m.p. 132.5-133.1 °C. <sup>1</sup>H NMR (CDCl<sub>3</sub>, 400 MHz): δ = 7.81-7.79 (m, 4H), 7.58-7.54 (m, 2H), 7.44-7.38 (m, 6H), 7.34-7.31 (m, 4H), 7.29-7.18 (m, 4H), 4.89 (s, 2H) ppm. <sup>13</sup>C NMR (CDCl<sub>3</sub>, 100 MHz): δ = 150.39, 139.81, 137.33, 133.66, 130.04, 129.86, 129.41, 129.15, 128.81, 128.00, 127.42, 125.76, 121.58, 118.52, 51.89 ppm. HRMS *m/z* (ESI) calcd for [C<sub>26</sub>H<sub>22</sub>N<sub>2</sub>O<sub>6</sub>S<sub>2</sub>+Na]<sup>+</sup> 545.0812, found 545.0811.

## 2) Subsequent alkoxylation of benzylic imidated *p*-tolylcarbamate **2a** with alcohols

### (Table 4, 6a-6o)

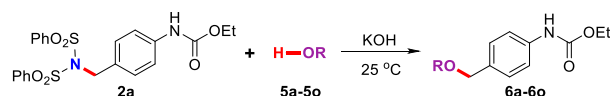

**Typical Procedure:** To a reaction tube charged with imidated *p*-tolylcarbamate **2a** (142.2 mg, 0.3 mmol) was added a suspension of KOH (67.2 mg, 1.2 mmol) in alcohols (**5a-5o**, 1 mL) under argon (1 atm). After stirring at 25°C for 4 hours, the mixture was concentrated *in vacuo*, followed by purification via flash chromatography on silica gel using petroleum ether and ethyl acetate as the eluent to afford corresponding benzylic ethers **6a-6o**.

### Ethyl (4-(methoxymethyl)phenyl)carbamate (**6a**)

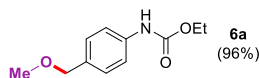

The reaction of 0.3 mmol of imidated *p*-tolylcarbamate **2a** (142.2 mg) with KOH (67.2 mg) in methanol (**5a**, 1 mL) at 25 °C in argon afforded 60.4 mg of **6a** (96%) after flash chromatography on silica gel using petroleum ether and ethyl acetate (8:1, *v/v*) as the eluent.

Colourless oil.  $^1\text{H NMR}$  ( $\text{CDCl}_3$ , 400 MHz):  $\delta$  = 7.36 (d,  $J$  = 8.1 Hz, 2H), 7.27 (d,  $J$  = 8.4 Hz, 2H), 6.78 (s, 1H), 4.40 (s, 2H), 4.22 (q,  $J$  = 7.1 Hz, 2H), 3.36 (s, 3H), 1.30 (t,  $J$  = 7.1 Hz, 3H) ppm.  $^{13}\text{C NMR}$  ( $\text{CDCl}_3$ , 100 MHz):  $\delta$  = 153.61, 137.47, 132.96, 128.66, 118.50, 74.20, 61.17, 57.84, 14.50 ppm. HRMS  $m/z$  (ESI) calcd for  $[\text{C}_{11}\text{H}_{15}\text{NO}_3+\text{Na}]^+$  232.0944, found 232.0944.

### Ethyl (4-(ethoxymethyl)phenyl)carbamate (**6b**)

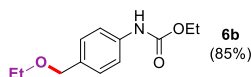

The reaction of 0.3 mmol of imidated *p*-tolylcarbamate **2a** (142.2 mg) with KOH (67.2 mg) in ethanol (**5b**, 1 mL) at 25 °C in argon afforded 56.7 mg of **6b** (85%) after flash chromatography on silica gel using petroleum ether and ethyl acetate (8:1, *v/v*) as the eluent.

Colourless oil.  $^1\text{H NMR}$  ( $\text{CDCl}_3$ , 400 MHz):  $\delta$  = 7.35 (d,  $J$  = 8.2 Hz, 2H), 7.27 (d,  $J$  = 8.4 Hz, 2H), 6.79 (s, 1H), 4.45 (s, 2H), 4.22 (q,  $J$  = 7.1 Hz, 2H), 3.52 (q,  $J$  = 7.0 Hz, 2H), 1.30 (t,  $J$  = 7.1 Hz, 3H), 1.23 (t,  $J$  = 7.0 Hz, 3H) ppm.  $^{13}\text{C NMR}$  ( $\text{CDCl}_3$ , 100 MHz):  $\delta$  = 153.61, 137.34, 133.38, 128.56, 118.52, 72.21, 65.47, 61.13, 15.15, 14.49 ppm. HRMS  $m/z$  (ESI) calcd for  $[\text{C}_{12}\text{H}_{17}\text{NO}_3+\text{Na}]^+$  246.1101, found 246.1107.

### Ethyl (4-(butoxymethyl)phenyl)carbamate (**6c**)

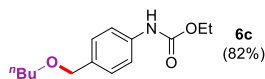

The reaction of 0.3 mmol of imidated *p*-tolylcarbamate **2a** (142.2 mg) with KOH (67.2 mg) in butanol (**5c**, 1 mL) at 25 °C in argon afforded 61.4 mg of **6c** (82%) after flash chromatography on silica gel using petroleum ether and ethyl acetate (8:1, *v/v*) as the eluent.

Colourless oil. **<sup>1</sup>H NMR (CDCl<sub>3</sub>, 400 MHz):** δ = 7.35 (d, *J* = 8.1 Hz, 2H), 7.26 (d, *J* = 8.4 Hz, 2H), 6.84 (s, 1H), 4.44 (s, 2H), 4.21 (q, *J* = 7.1 Hz, 2H), 3.45 (t, *J* = 6.6 Hz, 2H), 1.62-1.55 (m, 2H), 1.43-1.33 (m, 2H), 1.30 (t, *J* = 7.1 Hz, 3H), 0.91 (t, *J* = 7.4 Hz, 3H) ppm. **<sup>13</sup>C NMR (CDCl<sub>3</sub>, 100 MHz):** δ = 153.63, 137.31, 133.48, 128.47, 118.51, 72.33, 69.95, 61.10, 31.73, 19.29, 14.48, 13.85 ppm. **HRMS *m/z* (ESI)** calcd for [C<sub>14</sub>H<sub>21</sub>NO<sub>3</sub>+Na]<sup>+</sup> 274.1414, found 274.1717.

### Ethyl (4-((hexyloxy)methyl)phenyl)carbamate (**6d**)

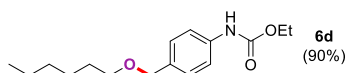

The reaction of 0.3 mmol of imidated *p*-tolylcarbamate **2a** (142.2 mg) with KOH (67.2 mg) in hexanol (**5d**, 1 mL) at 25 °C in argon afforded 75.1 mg of **6d** (90%) after flash chromatography on silica gel using petroleum ether and ethyl acetate (8:1, *v/v*) as the eluent.

Colourless oil. **<sup>1</sup>H NMR (CDCl<sub>3</sub>, 400 MHz):** δ = 7.35 (d, *J* = 8.0 Hz, 2H), 7.26 (d, *J* = 8.4 Hz, 2H), 6.79 (s, 1H), 4.44 (s, 2H), 4.22 (q, *J* = 7.1 Hz, 2H), 3.44 (t, *J* = 6.7 Hz, 2H), 1.60 (p, *J* = 7.0 Hz, 2H), 1.36-1.26 (m, 9H), 0.88 (t, *J* = 6.8 Hz, 3H) ppm. **<sup>13</sup>C NMR (CDCl<sub>3</sub>, 100 MHz):** δ = 153.62, 137.30, 133.50, 128.49, 118.49, 72.34, 70.29, 61.12, 31.63, 29.64, 25.80, 22.56, 14.49, 13.99 ppm. **HRMS *m/z* (ESI)** calcd for [C<sub>16</sub>H<sub>25</sub>NO<sub>3</sub>+Na]<sup>+</sup> 302.1727, found 302.1724.

### Ethyl (*E*)-(4-((but-2-en-1-yloxy)methyl)phenyl)carbamate (**6e**)

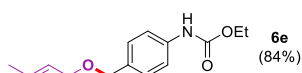

The reaction of 0.3 mmol of imidated *p*-tolylcarbamate **2a** (142.2 mg) with KOH (67.2 mg) in (*E*)-but-2-en-1-ol (crotonyl alcohol, **5e**, 1 mL) at 25 °C in argon afforded 62.5 mg of **6e** (84%) after flash chromatography on silica gel using petroleum ether and ethyl acetate (8:1, *v/v*) as the eluent.

Colourless oil. **<sup>1</sup>H NMR (CDCl<sub>3</sub>, 400 MHz):** δ = 7.35 (d, *J* = 8.1 Hz, 2H), 7.27 (d, *J* = 8.4 Hz, 2H), 6.81 (s, 1H),

1H), 5.75-5.68 (m, 1H), 5.64-5.57 (m, 1H), 4.44 (s, 2H), 4.21 (q,  $J = 7.1$  Hz, 2H), 3.93 (d,  $J = 6.2$  Hz, 2H), 1.71 (dd,  $J = 6.2$  Hz, 0.8 Hz, 3H), 1.30 (t,  $J = 7.1$  Hz, 3H) ppm.  $^{13}\text{C}$  NMR ( $\text{CDCl}_3$ , 100 MHz):  $\delta = 153.61, 137.35, 133.23, 129.68, 128.65, 127.43, 118.49, 71.38, 70.63, 61.11, 17.73, 14.48$  ppm. HRMS  $m/z$  (ESI) calcd for  $[\text{C}_{14}\text{H}_{19}\text{NO}_3+\text{Na}]^+$  272.1257, found 272.1255.

#### Ethyl (*E*)-4-((hex-2-en-1-yloxy)methyl)phenylcarbamate (**6f**)

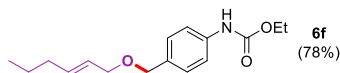

The reaction of 0.3 mmol of imidated *p*-tolylcarbamate **2a** (142.2 mg) with KOH (67.2 mg) in (*E*)-hex-2-en-1-ol (**5f**, 1 mL) at 25 °C in argon afforded 64.6 mg of **6f** (78%) after flash chromatography on silica gel using petroleum ether and ethyl acetate (8:1,  $v/v$ ) as the eluent.

Light-yellow oil.  $^1\text{H}$  NMR ( $\text{CDCl}_3$ , 400 MHz):  $\delta = 7.35$  (d,  $J = 8.1$  Hz, 2H), 7.27 (d,  $J = 7.9$  Hz, 2H), 6.75 (s, 1H), 5.74-5.67 (m, 1H), 5.61-5.54 (m, 1H), 4.44 (s, 2H), 4.22 (q,  $J = 7.1$  Hz, 2H), 3.95 (d,  $J = 6.1$  Hz, 2H), 2.03 (q,  $J = 7.0$  Hz, 2H), 1.41 (se,  $J = 7.4$  Hz, 2H), 1.30 (t,  $J = 7.1$  Hz, 3H), 0.90 (t,  $J = 7.4$  Hz, 3H) ppm.  $^{13}\text{C}$  NMR ( $\text{CDCl}_3$ , 100 MHz):  $\delta = 153.57, 137.33, 134.86, 133.29, 128.70, 126.24, 118.49, 71.32, 70.72, 61.15, 34.34, 22.18, 14.51, 13.67$  ppm. HRMS  $m/z$  (ESI) calcd for  $[\text{C}_{16}\text{H}_{23}\text{NO}_3+\text{Na}]^+$  300.1570, found 300.1577.

#### Ethyl 4-(((3-methylbut-2-en-1-yl)oxy)methyl)phenylcarbamate (**6g**)

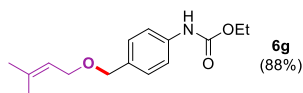

The reaction of 0.3 mmol of imidated *p*-tolylcarbamate **2a** (142.2 mg) with KOH (67.2 mg) in 3-methylbut-2-en-1-ol (**5g**, 1 mL) at 25 °C in argon afforded 69.6 mg of **6g** (78%) after flash chromatography on silica gel using petroleum ether and ethyl acetate (8:1,  $v/v$ ) as the eluent.

Colourless oil.  $^1\text{H}$  NMR ( $\text{CDCl}_3$ , 400 MHz):  $\delta = 7.35$  (d,  $J = 8.2$  Hz, 2H), 7.27 (d,  $J = 8.0$  Hz, 2H), 6.79 (s, 1H), 5.38 (tt,  $J = 6.9$  Hz, 1.2 Hz, 1H), 4.44 (s, 2H), 4.22 (q,  $J = 7.1$  Hz, 2H), 3.97 (d,  $J = 6.9$  Hz, 2H), 1.74 (s, 3H), 1.64 (s, 3H), 1.30 (t,  $J = 7.1$  Hz, 3H) ppm.  $^{13}\text{C}$  NMR ( $\text{CDCl}_3$ , 100 MHz):  $\delta = 153.59, 137.34, 137.17, 133.36, 128.67, 120.96, 118.45, 71.50, 66.29, 61.11, 25.73, 17.98, 14.49$  ppm. HRMS  $m/z$  (ESI) calcd for  $[\text{C}_{15}\text{H}_{21}\text{NO}_3+\text{Na}]^+$  286.1414, found 286.1414.

#### Ethyl 4-(((2-methylallyl)oxy)methyl)phenylcarbamate (**6h**)

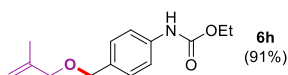

The reaction of 0.3 mmol of imidated *p*-tolylcarbamate **2a** (142.2 mg) with KOH (67.2 mg) in 2-methylprop-2-en-1-ol (**5h**, 1 mL) at 25 °C in argon afforded 67.7 mg of **6h** (91%) after flash chromatography on silica gel using petroleum ether and ethyl acetate (8:1, *v/v*) as the eluent.

Colourless oil. <sup>1</sup>H NMR (CDCl<sub>3</sub>, 400 MHz): δ = 7.36 (d, *J* = 8.1 Hz, 2H), 7.27 (d, *J* = 8.6 Hz, 2H), 6.80 (s, 1H), 4.99 (d, *J* = 0.6 Hz, 1H), 4.92 (s, 1H), 4.44 (s, 2H), 4.22 (q, *J* = 7.1 Hz, 2H), 3.91 (s, 2H), 1.76 (s, 3H), 1.30 (t, *J* = 7.1 Hz, 3H) ppm. <sup>13</sup>C NMR (CDCl<sub>3</sub>, 100 MHz): δ = 153.61, 142.09, 137.37, 133.20, 128.57, 118.50, 112.29, 73.83, 71.29, 61.13, 19.48, 14.49 ppm. HRMS *m/z* (ESI) calcd for [C<sub>14</sub>H<sub>19</sub>NO<sub>3</sub>+Na]<sup>+</sup> 272.1257, found 272.1258.

#### Ethyl 4-((but-2-yn-1-yloxy)methyl)phenylcarbamate (**6i**)

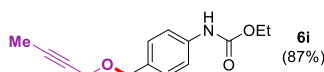

The reaction of 0.3 mmol of imidated *p*-tolylcarbamate **2a** (142.2 mg) with KOH (67.2 mg) in but-2-yn-1-ol (**5i**, 1 mL) at 25 °C in argon afforded 64.3 mg of **6i** (87%) after flash chromatography on silica gel using petroleum ether and ethyl acetate (8:1, *v/v*) as the eluent.

Colourless oil. <sup>1</sup>H NMR (CDCl<sub>3</sub>, 400 MHz): δ = 7.36 (d, *J* = 8.2 Hz, 2H), 7.28 (d, *J* = 8.3 Hz, 2H), 6.88 (s, 1H), 4.52 (s, 2H), 4.32 (q, *J* = 7.1 Hz, 2H), 4.10 (q, *J* = 2.3 Hz, 2H), 1.87 (t, *J* = 2.3 Hz, 3H), 1.30 (t, *J* = 7.1 Hz, 3H) ppm. <sup>13</sup>C NMR (CDCl<sub>3</sub>, 100 MHz): δ = 153.59, 137.58, 132.31, 128.92, 118.45, 82.59, 74.96, 70.87, 61.10, 57.38, 14.44, 3.53 ppm. HRMS *m/z* (ESI) calcd for [C<sub>14</sub>H<sub>17</sub>NO<sub>3</sub>+Na]<sup>+</sup> 270.1101, found 270.1100.

#### Ethyl 4-((2-cyanoethoxy)methyl)phenylcarbamate (**6j**)

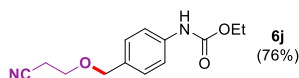

The reaction of 0.3 mmol of imidated *p*-tolylcarbamate **2a** (142.2 mg) with KOH (67.2 mg) in 3-hydroxypropanenitrile (**5j**, 1 mL) at 25 °C in argon afforded 56.7 mg of **6j** (76%) after flash chromatography on silica gel using petroleum ether and ethyl acetate (8:1, *v/v*) as the eluent.

Colourless oil. <sup>1</sup>H NMR (CDCl<sub>3</sub>, 400 MHz): δ = 7.38 (d, *J* = 8.2 Hz, 2H), 7.28 (d, *J* = 7.4 Hz, 2H), 6.77 (s, 1H), 4.52 (s, 2H), 4.22 (q, *J* = 7.1 Hz, 2H), 3.65 (t, *J* = 6.4 Hz, 2H), 2.61 (t, *J* = 6.4 Hz, 2H), 1.31 (t, *J* = 7.1 Hz, 3H) ppm. <sup>13</sup>C NMR (CDCl<sub>3</sub>, 100 MHz): δ = 153.56, 137.81, 131.94, 128.68, 118.60, 117.79, 72.81, 64.29, 61.21, 18.85, 14.48 ppm. HRMS *m/z* (ESI) calcd for [C<sub>13</sub>H<sub>16</sub>N<sub>2</sub>O<sub>3</sub>+Na]<sup>+</sup> 271.1053, found 271.1054.

### Ethyl 4-((3-methoxypropoxy)methyl)phenylcarbamate (**6k**)

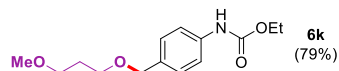

The reaction of 0.3 mmol of imidated *p*-tolylcarbamate **2a** (142.2 mg) with KOH (67.2 mg) in 3-methoxypropan-1-ol (**5k**, 1 mL) at 25 °C in argon afforded 63.6 mg of **6k** (79%) after flash chromatography on silica gel using petroleum ether and ethyl acetate (8:1, *v/v*) as the eluent.

Colourless oil. **<sup>1</sup>H NMR (CDCl<sub>3</sub>, 400 MHz)**: δ = 7.36 (d, *J* = 8.0 Hz, 2H), 7.25 (d, *J* = 8.4 Hz, 2H), 7.01 (s, 1H), 4.44 (s, 2H), 4.21 (q, *J* = 7.1 Hz, 2H), 3.53 (t, *J* = 6.4 Hz, 2H), 3.48 (t, *J* = 6.4 Hz, 2H), 3.32 (s, 3H), 1.87 (p, *J* = 6.4 Hz, 2H), 1.29 (t, *J* = 7.1 Hz, 3H) ppm. **<sup>13</sup>C NMR (CDCl<sub>3</sub>, 100 MHz)**: δ = 153.65, 137.43, 133.16, 128.44, 118.47, 72.43, 69.63, 66.99, 61.02, 58.47, 29.85, 14.44 ppm. **HRMS *m/z* (ESI)** calcd for [C<sub>14</sub>H<sub>21</sub>NO<sub>4</sub>+Na]<sup>+</sup> 290.1363, found 290.1362.

### Ethyl 4-(((3,7-dimethyloct-6-en-1-yl)oxy)methyl)phenylcarbamate (**6l**)

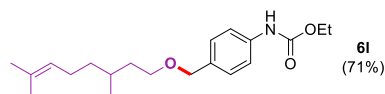

The reaction of 0.3 mmol of imidated *p*-tolylcarbamate **2a** (142.2 mg) with KOH (67.2 mg) in 3,7-dimethyloct-6-en-1-ol (citronellol, **5l**, 1 mL) at 25 °C in argon afforded 71.3 mg of **6l** (71%) after flash chromatography on silica gel using petroleum ether and ethyl acetate (8:1, *v/v*) as the eluent.

Colourless oil. **<sup>1</sup>H NMR (CDCl<sub>3</sub>, 400 MHz)**: δ = 7.35 (d, *J* = 8.2 Hz, 2H), 7.27 (d, *J* = 8.5 Hz, 2H), 6.72 (s, 1H), 5.11-5.07 (m, 1H), 4.44 (s, 2H), 4.22 (q, *J* = 7.1 Hz, 2H), 3.51-3.43 (m, 2H), 2.03-1.91 (m, 2H), 1.70-1.55 (m, 8H), 1.45-1.34 (m, 2H), 1.30 (t, *J* = 7.1 Hz, 3H), 1.19-1.12 (m, 1H), 0.88 (d, *J* = 6.6 Hz, 3H) ppm. **<sup>13</sup>C NMR (CDCl<sub>3</sub>, 100 MHz)**: δ = 153.58, 137.28, 133.52, 131.10, 128.51, 124.77, 118.46, 72.41, 68.50, 61.15, 37.15, 36.63, 29.50, 25.68, 25.41, 19.49, 17.59, 14.51 ppm. **HRMS *m/z* (ESI)** calcd for [C<sub>20</sub>H<sub>31</sub>NO<sub>3</sub>+Na]<sup>+</sup> 356.2196, found 356.2194.

### Ethyl (*E*)-4-(((3,7-dimethylocta-2,6-dien-1-yl)oxy)methyl)phenylcarbamate (**6m**)

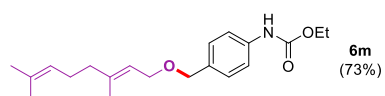

The reaction of 0.3 mmol of imidated *p*-tolylcarbamate **2a** (142.2 mg) with KOH (67.2 mg) in

(*E*)-3,7-dimethylocta-2,6-dien-1-ol (geraniol, **5m**, 1 mL) at 25 °C in argon afforded 72.3 mg of **6m** (73%) after flash chromatography on silica gel using petroleum ether and ethyl acetate (8:1, v/v) as the eluent.

Light-yellow oil.  $^1\text{H NMR}$  ( $\text{CDCl}_3$ , 400 MHz):  $\delta$  = 7.35 (d,  $J$  = 8.1 Hz, 2H), 7.28 (d,  $J$  = 8.5 Hz, 2H), 6.73 (s, 1H), 5.38 (t,  $J$  = 6.6 Hz, 1H), 5.10 (t,  $J$  = 6.5 Hz, 1H), 4.45 (s, 2H), 4.22 (q,  $J$  = 7.1 Hz, 2H), 4.00 (d,  $J$  = 6.8 Hz, 2H), 2.12-2.02 (m, 4H), 1.68 (s, 3H), 1.63 (s, 3H), 1.60 (s, 3H), 1.30 (t,  $J$  = 7.1 Hz, 3H) ppm.  $^{13}\text{C NMR}$  ( $\text{CDCl}_3$ , 100 MHz):  $\delta$  = 153.57, 140.40, 137.33, 133.45, 131.61, 128.73, 123.96, 120.73, 118.49, 71.42, 66.33, 61.16, 39.55, 26.31, 25.66, 17.64, 16.45, 14.51 ppm. HRMS  $m/z$  (ESI) calcd for  $[\text{C}_{20}\text{H}_{29}\text{NO}_3+\text{Na}]^+$  354.2040, found 354.2042.

#### Ethyl (*Z*)-(4-(((3,7-dimethylocta-2,6-dien-1-yl)oxy)methyl)phenyl)carbamate (**6n**)

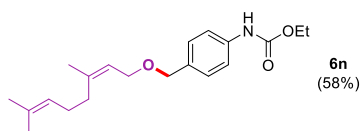

The reaction of 0.3 mmol of imidated *p*-tolylcarbamate **2a** (142.2 mg) with KOH (67.2 mg) in (*Z*)-3,7-dimethylocta-2,6-dien-1-ol (nerol, **5n**, 1 mL) at 25 °C in argon afforded 57.4 mg of **6n** (58%) after flash chromatography on silica gel using petroleum ether and ethyl acetate (8:1, v/v) as the eluent.

Light-yellow oil.  $^1\text{H NMR}$  ( $\text{CDCl}_3$ , 400 MHz):  $\delta$  = 7.35 (d,  $J$  = 8.2 Hz, 2H), 7.27 (d,  $J$  = 8.4 Hz, 2H), 6.65 (s, 1H), 5.39 (t,  $J$  = 6.5 Hz, 1H), 5.07 (s, 1H), 4.44 (s, 2H), 4.22 (q,  $J$  = 7.1 Hz, 2H), 3.98 (d,  $J$  = 6.8 Hz, 2H), 2.05-2.04 (m, 4H), 1.75 (s, 3H), 1.67 (s, 3H), 1.58 (s, 3H), 1.31 (t,  $J$  = 7.1 Hz, 3H) ppm.  $^{13}\text{C NMR}$  ( $\text{CDCl}_3$ , 100 MHz):  $\delta$  = 153.55, 140.60, 137.30, 133.45, 131.88, 128.69, 123.81, 121.74, 118.43, 71.61, 66.19, 61.16, 32.21, 26.65, 25.66, 23.46, 17.60 14.52 ppm. HRMS  $m/z$  (ESI) calcd for  $[\text{C}_{20}\text{H}_{29}\text{NO}_3+\text{Na}]^+$  354.2040, found 354.2037.

#### Ethyl (*Z*)-(4-(((3,7-dimethylocta-2,6-dien-1-yl)oxy)methyl)phenyl)carbamate (**6o**)

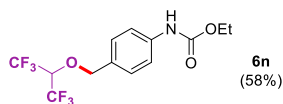

The reaction of 0.3 mmol of imidated *p*-tolylcarbamate **2a** (142.2 mg) with KOH (67.2 mg) in 1,1,1,3,3,3-hexafluoropropan-2-ol (HFIP, **5o**, 1 mL) at 40 °C in argon afforded 94.5 mg of **6o** (91%) after flash chromatography on silica gel using petroleum ether and ethyl acetate (8:1, v/v) as the eluent.

White solid, m.p. 74.1-74.7 °C.  $^1\text{H NMR}$  ( $\text{CDCl}_3$ , 400 MHz):  $\delta$  = 7.42 (d,  $J$  = 8.3 Hz, 2H), 7.29 (d,  $J$  = 8.5



Hz, 2H), 6.78 (s, 1H), 4.77 (s, 2H), 4.23 (q,  $J = 7.1$  Hz, 2H), 4.10 (h,  $J = 6.0$  Hz, 1H), 1.31 (t,  $J = 7.1$  Hz, 3H) ppm.  $^{13}\text{C}$  NMR ( $\text{CDCl}_3$ , 100 MHz):  $\delta = 153.56, 138.81, 129.79, 129.24, 121.55$  (q,  $J = 282.1$  Hz), 118.64, 75.45, 73.90 (p,  $J = 32.2$  Hz), 61.36, 14.43 ppm. HRMS  $m/z$  (ESI) calcd for  $[\text{C}_{13}\text{H}_{13}\text{F}_6\text{NO}_3+\text{Na}]^+$  368.0692, found 368.0697.

### 3) Subsequent acyloxylation of benzylic imidated *p*-tolylcarbamate **2a** with carboxylate

(Table 4, **6p**)

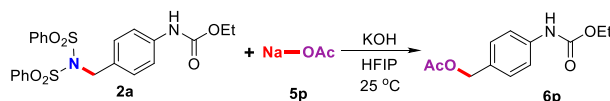

**Typical Procedure:** To a reaction tube charged with imidated *p*-tolylcarbamate **2a** (142.2 mg, 0.3 mmol) and KOH (33.6 mg, 0.6 mmol) was added a suspension of sodium acetate (NaOAc, **5p**, 49.2 mg, 0.6 mmol) in HFIP (2 mL) under argon (1 atm). After stirring at 40°C for 4 hours, the mixture was concentrated *in vacuo*, followed by purification via flash chromatography on silica gel using petroleum ether and ethyl acetate as the eluent to afford 46.6 mg of benzyl acetate **6p** (66%).

#### 4-((Ethoxycarbonyl)amino)benzyl acetate (**6p**)

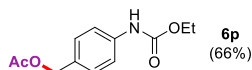

White solid, m.p. 104.8-105.2 °C.  $^1\text{H NMR}$  ( $\text{CDCl}_3$ , 400 MHz):  $\delta$  = 7.39 (d,  $J$  = 8.2 Hz, 2H), 7.30 (d,  $J$  = 8.3 Hz, 2H), 6.77 (s, 1H), 5.05 (s, 2H), 4.22 (q,  $J$  = 7.1 Hz, 2H), 2.08 (s, 3H), 1.31 (t,  $J$  = 7.1 Hz, 3H) ppm.  $^{13}\text{C NMR}$  ( $\text{CDCl}_3$ , 100 MHz):  $\delta$  = 170.95, 153.50, 138.07, 130.67, 129.35, 118.53, 65.95, 61.25, 21.01, 14.49 ppm. **HRMS**  $m/z$  (ESI) calcd for  $[\text{C}_{12}\text{H}_{15}\text{NO}_4+\text{Na}]^+$  260.0893, found 260.0890.

#### 4) Subsequent arylation of benzylic imidated *p*-tolylcarbamate **2a** with arenes (Table 5)

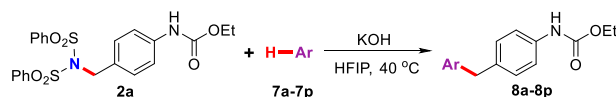

**Typical Procedure:** To a reaction tube charged with imidated *p*-tolylcarbamate **2a** (142.2 mg, 0.3 mmol) and KOH (33.6 mg, 0.6 mmol) was added a solution of arenes (**7a-7p**, 0.6 mmol) in HFIP (2 mL) under argon (1 atm). After stirring at 40°C for 4 hours, the mixture was concentrated *in vacuo*, followed by purification via flash chromatography on silica gel using petroleum ether and ethyl acetate as the eluent to afford corresponding benzylated arenes **8a-8p**.

##### Ethyl (4-((1*H*-indol-3-yl)methyl)phenyl)carbamate (**8a**)

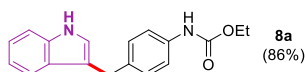

The reaction of 0.3 mmol of imidated *p*-tolylcarbamate **2a** (142.2 mg) and 1*H*-indole (**7a**, 70.2 mg) with KOH (33.6 mg) in HFIP (2 mL) at 40 °C in argon afforded 75.5 mg of **8a** (86%) after flash chromatography on silica gel using petroleum ether and ethyl acetate (10:1 to 8:1, *v/v*) as the eluent.

White solid, m.p. 89.6-89.8 °C.  $^1\text{H NMR}$  ( $\text{CDCl}_3$ , 400 MHz):  $\delta$  = 7.98 (s, 1H), 7.48 (d,  $J$  = 7.9 Hz, 1H), 7.31 (d,  $J$  = 8.1 Hz, 1H), 7.27-7.14 (m, 5H), 7.06 (t,  $J$  = 7.4 Hz, 1H), 6.84 (s, 1H), 6.57 (s, 1H), 4.20 (q,  $J$  = 7.1 Hz, 2H), 4.04 (s, 2H), 1.28 (t,  $J$  = 7.1 Hz, 3H) ppm.  $^{13}\text{C NMR}$  ( $\text{CDCl}_3$ , 100 MHz):  $\delta$  = 153.78, 136.39, 136.31, 135.70, 129.16, 127.30, 122.31, 121.92, 119.22, 119.03, 118.87, 115.66, 111.06, 102.21, 61.13, 30.87, 14.51 ppm. HRMS  $m/z$  (ESI) calcd for  $[\text{C}_{18}\text{H}_{18}\text{N}_2\text{O}_2+\text{Na}]^+$  217.1261, found 217.2157.

##### Ethyl (4-((5-chloro-1*H*-indol-3-yl)methyl)phenyl)carbamate (**8b**)

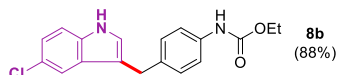

The reaction of 0.3 mmol of imidated *p*-tolylcarbamate **2a** (142.2 mg) and 5-chloro-1*H*-indole (**7b**, 90.6 mg) with KOH (33.6 mg) in HFIP (2 mL) at 40 °C in argon afforded 86.8 mg of **8b** (88%) after flash chromatography on silica gel using petroleum ether and ethyl acetate (8:1 to 6:1, *v/v*) as the eluent.

White solid, m.p. 122.7-123.0 °C.  $^1\text{H NMR}$  ( $\text{CDCl}_3$ , 400 MHz):  $\delta$  = 8.10 (s, 1H), 7.43 (d,  $J$  = 1.7 Hz, 1H), 7.25-7.07 (m, 6H), 6.84 (s, 1H), 6.60 (s, 1H), 4.20 (q,  $J$  = 7.1 Hz, 2H), 3.97 (s, 2H), 1.28 (t,  $J$  = 7.1 Hz, 3H) ppm.  $^{13}\text{C NMR}$  ( $\text{CDCl}_3$ , 100 MHz):  $\delta$  = 153.76, 135.84, 134.73, 129.66, 129.10, 128.40, 124.96, 123.72, 122.24, 118.91, 118.49, 115.50, 112.08, 101.83, 61.17, 30.68, 14.52 ppm. HRMS  $m/z$  (ESI) calcd for

[C<sub>18</sub>H<sub>17</sub>ClN<sub>2</sub>O<sub>2</sub>+Na]<sup>+</sup> 351.0871, found 351.0869.

### Ethyl (4-((5-cyano-1*H*-indol-3-yl)methyl)phenyl)carbamate (**8c**)

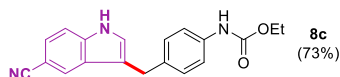

The reaction of 0.3 mmol of imidated *p*-tolylcarbamate **2a** (142.2 mg) and 1*H*-indole-5-carbonitrile (**7c**, 85.2 mg) with KOH (33.6 mg) in HFIP (2 mL) at 40 °C in argon afforded 69.7 mg of **8c** (73%) after flash chromatography on silica gel using petroleum ether and ethyl acetate (6:1 to 3:1, *v/v*) as the eluent.

White solid, m.p. 148.5-148.9 °C. <sup>1</sup>H NMR (DMSO-*d*<sub>6</sub>, 400 MHz): δ = 11.45 (s, 1H), 9.50 (s, 1H), 7.96 (s, 1H), 7.52 (d, *J* = 8.4 Hz, 1H), 7.42-7.36 (m, 4H), 7.22 (d, *J* = 8.4 Hz, 2H), 4.12 (q, *J* = 7.1 Hz, 2H), 4.02 (s, 2H), 1.25 (t, *J* = 7.1 Hz, 3H) ppm. <sup>13</sup>C NMR (DMSO-*d*<sub>6</sub>, 100 MHz): δ = 153.56, 138.08, 137.06, 135.05, 128.69, 126.76, 125.68, 124.27, 123.68, 120.87, 118.27, 115.60, 112.69, 100.29, 60.01, 29.90, 14.53 ppm. HRMS *m/z* (ESI) calcd for [C<sub>19</sub>H<sub>17</sub>N<sub>3</sub>O<sub>2</sub>+Na]<sup>+</sup> 342.1213, found 342.1216.

### Ethyl 3-(4-((ethoxycarbonyl)amino)benzyl)-1*H*-indole-5-carboxylate (**8d**)

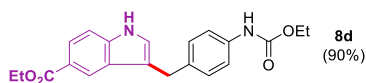

The reaction of 0.3 mmol of imidated *p*-tolylcarbamate **2a** (142.2 mg) and ethyl 1*H*-indole-5-carboxylate (**7d**, 113.4 mg) with KOH (33.6 mg) in HFIP (2 mL) at 40 °C in argon afforded 99.0 mg of **8d** (90%) after flash chromatography on silica gel using petroleum ether and ethyl acetate (6:1 to 3:1, *v/v*) as the eluent.

White solid, m.p. 144.7-145.1 °C. <sup>1</sup>H NMR (DMSO-*d*<sub>6</sub>, 400 MHz): δ = 11.25 (s, 1H), 9.49 (s, 1H), 8.12 (s, 1H), 7.72 (dd, *J* = 8.6 Hz, 1.4 Hz, 1H), 7.43 (d, *J* = 8.6 Hz, 1H), 7.38 (d, *J* = 8.3 Hz, 2H), 7.25 (d, *J* = 1.8 Hz, 1H), 7.18 (d, *J* = 8.4 Hz, 2H), 4.28 (q, *J* = 7.1 Hz, 2H), 4.11 (q, *J* = 7.1 Hz, 2H), 4.03 (s, 2H), 1.31 (t, *J* = 7.1 Hz, 3H), 1.23 (t, *J* = 7.1 Hz, 3H) ppm. <sup>13</sup>C NMR (DMSO-*d*<sub>6</sub>, 100 MHz): δ = 166.85, 153.63, 139.11, 137.11, 135.21, 128.67, 126.61, 125.03, 122.05, 121.25, 120.12, 118.25, 115.69, 111.38, 60.10, 60.07, 30.17, 14.59, 14.37 ppm. HRMS *m/z* (ESI) calcd for [C<sub>21</sub>H<sub>22</sub>N<sub>2</sub>O<sub>4</sub>+Na]<sup>+</sup> 389.1472, found 389.1475.

### Ethyl (4-((6-fluoro-1*H*-indol-3-yl)methyl)phenyl)carbamate (**8e**)

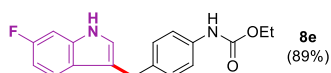

The reaction of 0.3 mmol of imidated *p*-tolylcarbamate **2a** (142.2 mg) and 6-fluoro-1*H*-indole (**7e**, 81.0 mg) with KOH (33.6 mg) in HFIP (2 mL) at 40 °C in argon afforded 83.4 mg of **8e** (89%) after flash

chromatography on silica gel using petroleum ether and ethyl acetate (10:1 to 8:1, v/v) as the eluent.

White solid, m.p. 210.5-211.0 °C.  $^1\text{H NMR}$  ( $\text{CDCl}_3$ , 400 MHz):  $\delta$  = 8.01 (s, 1H), 7.35 (dd,  $J$  = 8.6 Hz, 5.4 Hz, 1H), 7.27 (d,  $J$  = 8.2 Hz, 2H), 7.17 (d,  $J$  = 8.4 Hz, 2H), 6.99 (dd,  $J$  = 9.7 Hz, 2.1 Hz, 1H), 6.83-6.79 (m, 2H), 6.56 (s, 1H), 4.20 (q,  $J$  = 7.1 Hz, 2H), 4.01 (s, 2H), 1.29 (t,  $J$  = 7.1 Hz, 3H) ppm.  $^{13}\text{C NMR}$  ( $\text{CDCl}_3$ , 100 MHz):  $\delta$  = 159.97 (d,  $J$  = 236.1 Hz), 153.77, 136.35 (d,  $J$  = 12.4 Hz), 135.93 (d,  $J$  = 19.7 Hz), 129.15, 123.93, 122.52 (d,  $J$  = 3.5 Hz), 119.78 (d,  $J$  = 10.2 Hz), 118.90, 115.83, 108.01 (d,  $J$  = 24.4 Hz), 102.33, 97.34 (d,  $J$  = 26.0 Hz), 61.18, 30.87, 14.53 ppm. HRMS  $m/z$  (ESI) calcd for  $[\text{C}_{18}\text{H}_{17}\text{FN}_2\text{O}_2+\text{Na}]^+$  335.1166, found 335.1170.

#### Ethyl 4-((6-chloro-1H-indol-3-yl)methyl)phenyl)carbamate (8f)

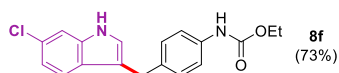

The reaction of 0.3 mmol of imidated *p*-tolylcarbamate **2a** (142.2 mg) and 6-chloro-1H-indole (**7f**, 90.6 mg) with KOH (33.6 mg) in HFIP (2 mL) at 40 °C in argon afforded 72.1 mg of **8f** (73%) after flash chromatography on silica gel using petroleum ether and ethyl acetate (10:1 to 8:1, v/v) as the eluent.

White solid, m.p. 127.1-127.7 °C.  $^1\text{H NMR}$  ( $\text{CDCl}_3$ , 400 MHz):  $\delta$  = 8.03 (s, 1H), 7.36-7.25 (m, 4H), 7.18-7.13 (m, 2H), 7.02-7.00 (m, 1H), 6.85 (s, 1H), 6.55 (s, 1H), 4.21 (q,  $J$  = 7.0 Hz, 2H), 4.01 (s, 2H), 1.29 (t,  $J$  = 7.0 Hz, 3H) ppm.  $^{13}\text{C NMR}$  ( $\text{CDCl}_3$ , 100 MHz):  $\delta$  = 153.75, 136.77, 135.85, 129.50, 129.13, 127.91, 125.94, 122.93, 120.01, 119.96, 118.88, 115.91, 110.99, 61.19, 30.78, 14.53 ppm. HRMS  $m/z$  (ESI) calcd for  $[\text{C}_{18}\text{H}_{17}\text{ClN}_2\text{O}_2+\text{Na}]^+$  351.0871, found 351.0877.

#### Ethyl 3-(4-((ethoxycarbonyl)amino)benzyl)-1H-indole-6-carboxylate (8g)

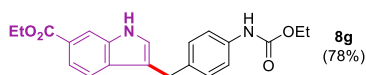

The reaction of 0.3 mmol of imidated *p*-tolylcarbamate **2a** (142.2 mg) and ethyl 1H-indole-6-carboxylate (**7g**, 113.4 mg) with KOH (33.6 mg) in HFIP (2 mL) at 40 °C in argon afforded 85.2 mg of **8g** (78%) after flash chromatography on silica gel using petroleum ether and ethyl acetate (6:1 to 3:1, v/v) as the eluent.

White solid, m.p. 141.4-141.7 °C.  $^1\text{H NMR}$  ( $\text{DMSO-d}_6$ , 400 MHz):  $\delta$  = 11.24 (s, 1H), 9.47 (s, 1H), 8.03 (s, 1H), 7.57 (dd,  $J$  = 8.4 Hz, 1.3 Hz, 1H), 7.50 (d,  $J$  = 8.4 Hz, 1H), 7.38-7.34 (m, 3H), 7.18 (d,  $J$  = 8.4 Hz, 2H), 4.30 (q,  $J$  = 7.1 Hz, 2H), 4.10 (q,  $J$  = 7.1 Hz, 2H), 3.99 (s, 2H), 1.33 (t,  $J$  = 7.1 Hz, 3H), 1.22 (t,  $J$  = 7.1 Hz, 3H) ppm.  $^{13}\text{C NMR}$  ( $\text{DMSO-d}_6$ , 100 MHz):  $\delta$  = 166.84, 153.61, 137.05, 135.67, 135.31, 130.42, 128.69, 127.19, 122.26, 119.03, 118.40, 118.24, 114.88, 113.43, 60.24, 60.06, 30.21, 14.58, 14.36 ppm. HRMS  $m/z$  (ESI) calcd

for  $[\text{C}_{21}\text{H}_{22}\text{N}_2\text{O}_4+\text{Na}]^+$  389.1472, found 389.1476.

### Ethyl 4-((1-methyl-1*H*-indol-3-yl)methyl)phenylcarbamate (**8h**)

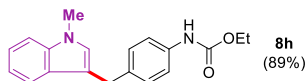

The reaction of 0.3 mmol of imidated *p*-tolylcarbamate **2a** (142.2 mg) and 1-methyl-1*H*-indole (**7h**, 78.6 mg) with KOH (33.6 mg) in HFIP (2 mL) at 40 °C in argon afforded 82.5 mg of **8h** (89%) after flash chromatography on silica gel using petroleum ether and ethyl acetate (10:1 to 8:1, *v/v*) as the eluent.

White solid, m.p. 105.9-106.3 °C.  $^1\text{H NMR}$  ( $\text{CDCl}_3$ , 400 MHz):  $\delta$  = 7.48 (d,  $J$  = 7.9 Hz, 1H), 7.27-7.18 (m, 6H), 7.07-7.03 (m, 1H), 6.70 (s, 1H), 6.56 (s, 1H), 4.19 (q,  $J$  = 7.1 Hz, 2H), 4.03 (s, 2H), 3.68 (s, 3H), 1.28 (t,  $J$  = 7.1 Hz, 3H) ppm.  $^{13}\text{C NMR}$  ( $\text{CDCl}_3$ , 100 MHz):  $\delta$  = 153.68, 137.12, 136.45, 135.74, 129.16, 127.71, 127.05, 121.52, 119.13, 118.71, 114.29, 109.09, 100.56, 61.09, 32.52, 30.81, 14.53 ppm. HRMS  $m/z$  (ESI) calcd for  $[\text{C}_{19}\text{H}_{20}\text{N}_2\text{O}_2+\text{Na}]^+$  331.1417, found 331.1418.

### Methyl 3-(4-((ethoxycarbonyl)amino)benzyl)-1-methyl-1*H*-indole-5-carboxylate (**8i**)

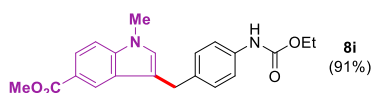

The reaction of 0.3 mmol of imidated *p*-tolylcarbamate **2a** (142.2 mg) and methyl 1-methyl-1*H*-indole-5-carboxylate (**7i**, 113.4 mg) with KOH (33.6 mg) in HFIP (2 mL) at 40 °C in argon afforded 99.8 mg of **8i** (91%) after flash chromatography on silica gel using petroleum ether and ethyl acetate (8:1 to 6:1, *v/v*) as the eluent.

White solid, m.p. 130.6-130.8 °C.  $^1\text{H NMR}$  ( $\text{DMSO-}d_6$ , 400 MHz):  $\delta$  = 9.50 (s, 1H), 8.10 (t,  $J$  = 1.1 Hz, 1H), 7.73 (dd,  $J$  = 8.7 Hz, 1.6 Hz, 1H), 7.42 (d,  $J$  = 8.7 Hz, 1H), 7.35 (d,  $J$  = 8.2 Hz, 2H), 7.14-7.12 (m, 3H), 4.06 (q,  $J$  = 7.1 Hz, 2H), 3.96 (s, 2H), 3.78 (s, 3H), 3.71 (s, 3H), 1.19 (t,  $J$  = 7.1 Hz, 3H) ppm.  $^{13}\text{C NMR}$  ( $\text{DMSO-}d_6$ , 100 MHz):  $\delta$  = 167.24, 153.61, 139.24, 137.13, 134.99, 129.38, 128.62, 126.82, 122.09, 121.35, 119.88, 118.31, 115.26, 109.65, 60.04, 51.67, 32.44, 29.90, 14.54 ppm. HRMS  $m/z$  (ESI) calcd for  $[\text{C}_{21}\text{H}_{22}\text{N}_2\text{O}_4+\text{Na}]^+$  389.1472, found 389.1472.

### Ethyl 4-((2,3-dimethyl-3*H*-indol-3-yl)methyl)phenylcarbamate (**8j**)

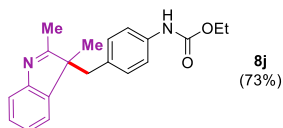

The reaction of 0.3 mmol of imidated *p*-tolylcarbamate **2a** (142.2 mg) and 2,3-dimethyl-1*H*-indole (**7j**, 87.1 mg) with KOH (33.6 mg) in HFIP (2 mL) at 40 °C in argon afforded 70.3 mg of **8j** (73%) after flash chromatography on silica gel using petroleum ether and ethyl acetate (3:1 to 1:1, *v/v*) as the eluent.

White solid, m.p. 96.7-97.0 °C. <sup>1</sup>H NMR (DMSO-*d*<sub>6</sub>, 400 MHz): δ = 9.40 (s, 1H), 7.35 (d, *J* = 7.2 Hz, 1H), 7.24-7.16 (m, 3H), 7.11 (d, *J* = 8.4 Hz, 2H), 6.63 (d, *J* = 8.4 Hz, 2H), 4.07 (q, *J* = 7.1 Hz, 2H), 3.16 (d, *J* = 13.6 Hz, 1H), 2.95 (d, *J* = 13.6 Hz, 1H), 2.27 (s, 3H), 1.31 (s, 3H), 1.20 (t, *J* = 7.1 Hz, 3H) ppm. <sup>13</sup>C NMR (DMSO-*d*<sub>6</sub>, 100 MHz): δ = 185.94, 154.30, 153.44, 143.49, 137.41, 130.42, 129.24, 127.39, 124.42, 122.65, 119.08, 117.18, 60.04, 58.58, 41.04, 22.08, 16.00, 14.54 ppm. HRMS *m/z* (ESI) calcd for [C<sub>20</sub>H<sub>22</sub>N<sub>2</sub>O<sub>2</sub>+Na]<sup>+</sup> 345.1574, found 345.1572.

#### Ethyl (4-((1,2,3,4-tetrahydro-4a*H*-carbazol-4a-yl)methyl)phenyl)carbamate (**8k**)

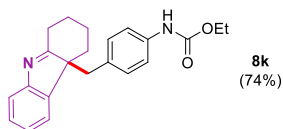

The reaction of 0.3 mmol of imidated *p*-tolylcarbamate **2a** (142.2 mg) and 2,3,4,9-tetrahydro-1*H*-carbazole (**7k**, 102.6 mg) with KOH (33.6 mg) in HFIP (2 mL) at 40 °C in argon afforded 77.4 mg of **8k** (74%) after flash chromatography on silica gel using petroleum ether and ethyl acetate (3:1 to 1:1, *v/v*) as the eluent.

Light-yellow solid, m.p. 219.4-219.7 °C. <sup>1</sup>H NMR (DMSO-*d*<sub>6</sub>, 400 MHz): δ = 9.39 (s, 1H), 7.38 (dt, *J* = 7.2 Hz, 0.8 Hz, 1H), 7.28 (dt, *J* = 7.7 Hz, 1.8 Hz, 1H), 7.23-7.13 (m, 2H), 7.04 (d, *J* = 8.4 Hz, 2H), 6.59 (d, *J* = 8.6 Hz, 2H), 4.05 (q, *J* = 7.1 Hz, 2H), 3.22 (d, *J* = 13.6 Hz, 1H), 3.11 (d, *J* = 13.6 Hz, 1H), 2.84-2.79 (m, 1H), 2.71-2.67 (m, 1H), 2.44-2.40 (m, 1H), 2.17-1.99 (m, 2H), 1.66-1.63 (m, 1H), 1.31-1.27 (m, 1H), 1.19 (t, *J* = 7.1 Hz, 3H), 1.04-0.98 (m, 1H) ppm. <sup>13</sup>C NMR (DMSO-*d*<sub>6</sub>, 100 MHz): δ = 187.91, 154.78, 153.40, 144.65, 137.24, 130.31, 129.19, 127.25, 124.10, 122.54, 119.34, 117.14, 59.98, 58.73, 37.77, 29.98, 28.96, 28.31, 20.72, 14.51 ppm. HRMS *m/z* (ESI) calcd for [C<sub>22</sub>H<sub>24</sub>N<sub>2</sub>O<sub>2</sub>+Na]<sup>+</sup> 371.1730, found 371.1733.

#### Ethyl (4-((3,4-dimethoxythiophen-2-yl)methyl)phenyl)carbamate (**8l**)

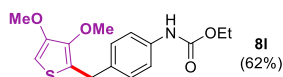

The reaction of 0.3 mmol of imidated *p*-tolylcarbamate **2a** (142.2 mg) and 3,4-dimethoxythiophene (**7l**, 86.4 mg) with KOH (33.6 mg) in HFIP (2 mL) at 40 °C in argon afforded 60.0 mg of **8l** (62%) after flash chromatography on silica gel using petroleum ether and ethyl acetate (8:1, *v/v*) as the eluent.

White solid, m.p. 101.6-101.9 °C. <sup>1</sup>H NMR (DMSO-*d*<sub>6</sub>, 400 MHz): δ = 9.51 (s, 1H), 7.34 (d, *J* = 8.3 Hz, 2H), 7.07 (d, *J* = 8.5 Hz, 2H), 6.30 (s, 1H), 4.07 (q, *J* = 7.1 Hz, 2H), 3.83 (s, 2H), 3.70 (s, 3H), 3.64 (s, 3H), 1.19 (t, *J* = 7.1 Hz, 3H) ppm. <sup>13</sup>C NMR (DMSO-*d*<sub>6</sub>, 100 MHz): δ = 153.54, 150.11, 143.00, 137.52, 133.76, 128.64, 125.66, 118.28, 93.90, 60.19, 60.04, 56.97, 31.13, 14.51 ppm. HRMS *m/z* (ESI) calcd for [C<sub>16</sub>H<sub>19</sub>NO<sub>4</sub>S+Na]<sup>+</sup> 344.0927, found 344.0928.

#### Ethyl (4-((2,3-dihydrothieno[3,4-*b*][1,4]dioxin-5-yl)methyl)phenyl)carbamate (**8m**)

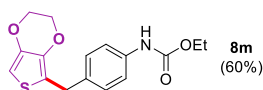

The reaction of 0.3 mmol of imidated *p*-tolylcarbamate **2a** (142.2 mg) and 2,3-dihydrothieno[3,4-*b*][1,4]dioxine (**7m**, 85.2 mg) with KOH (33.6 mg) in HFIP (2 mL) at 40 °C in argon afforded 57.7 mg of **8m** (60%) after flash chromatography on silica gel using petroleum ether and ethyl acetate (8:1 to 6:1, *v/v*) as the eluent.

White solid, m.p. 81.3-81.9 °C. <sup>1</sup>H NMR (CDCl<sub>3</sub>, 400 MHz): δ = 7.29 (d, *J* = 8.0 Hz, 2H), 7.17 (d, *J* = 8.3 Hz, 2H), 6.58 (s, 1H), 6.13 (s, 1H), 4.23-4.16 (m, 6H), 3.91 (s, 2H), 1.29 (t, *J* = 7.1 Hz, 3H) ppm. <sup>13</sup>C NMR (CDCl<sub>3</sub>, 100 MHz): δ = 141.47, 137.80, 136.20, 134.97, 129.05, 118.78, 116.72, 96.26, 64.66, 64.60, 61.15, 31.24, 14.53 ppm. HRMS *m/z* (ESI) calcd for [C<sub>16</sub>H<sub>17</sub>NO<sub>4</sub>S+Na]<sup>+</sup> 342.0771, found 342.0771.

#### Ethyl (4-((1*H*-pyrrol-2-yl)methyl)phenyl)carbamate (**8n**)

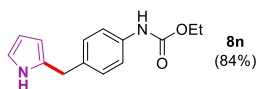

The reaction of 0.3 mmol of imidated *p*-tolylcarbamate **2a** (142.2 mg) and 1*H*-pyrrole (**7n**, 40.2 mg) with KOH (33.6 mg) in HFIP (2 mL) at 40 °C in argon afforded 61.8 mg of **8n** (84%) after flash chromatography on silica gel using petroleum ether and ethyl acetate (8:1, *v/v*) as the eluent.

Light-yellow solid, m.p. 50.8-51.4 °C. <sup>1</sup>H NMR (CDCl<sub>3</sub>, 400 MHz): δ = 7.86 (s, 1H), 7.30 (d, *J* = 8.0 Hz, 2H), 7.13 (d, *J* = 8.4 Hz, 2H), 6.65 (d, *J* = 1.5 Hz, 1H), 6.59 (s, 1H), 6.13 (q, *J* = 2.8 Hz, 1H), 5.97 (s, 1H), 4.21 (q, *J* = 7.1 Hz, 2H), 3.92 (s, 2H), 1.30 (t, *J* = 7.1 Hz, 3H) ppm. <sup>13</sup>C NMR (CDCl<sub>3</sub>, 100 MHz): δ = 153.70,



136.26, 134.51, 130.69, 129.23, 119.04, 116.93, 108.28, 106.31, 61.20, 33.35, 15.52 ppm. **HRMS  $m/z$  (ESI)** calcd for  $[C_{14}H_{16}N_2O_2+Na]^+$  267.1104, found 267.1108.

#### Ethyl (4-((5-pivalamidoquinolin-8-yl)methyl)phenyl)carbamate (**8o**)

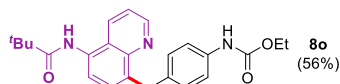

The reaction of 0.3 mmol of imidated *p*-tolylcarbamate **2a** (142.2 mg) and *N*-(quinolin-5-yl)pivalamide (**7o**, 136.8 mg) with KOH (33.6 mg) in HFIP (2 mL) at 40 °C in argon afforded 68.4 mg of **8o** (56%) after flash chromatography on silica gel using petroleum ether and ethyl acetate (8:1 to 6:1, *v/v*) as the eluent.

White solid, m.p. 173.2-174.0 °C.  **$^1H$  NMR (CDCl<sub>3</sub>, 400 MHz):**  $\delta$  = 10.29 (s, 1H), 8.77 (d,  $J$  = 4.0 Hz, 1H), 8.73 (d,  $J$  = 7.9 Hz, 1H), 8.23 (d,  $J$  = 8.4 Hz, 1H), 7.38-7.35 (m, 2H), 7.26 (d,  $J$  = 7.8 Hz, 2H), 7.06 (d,  $J$  = 8.3 Hz, 2H), 6.63 (s, 1H), 4.31 (s, 2H), 4.21 (q,  $J$  = 7.1 Hz, 2H), 1.42 (s, 9H), 1.28 (t,  $J$  = 7.1 Hz, 3H) ppm.  **$^{13}C$  NMR (CDCl<sub>3</sub>, 100 MHz):**  $\delta$  = 177.17, 153.67, 147.68, 139.29, 136.18, 135.28, 133.60, 133.15, 130.29, 128.88, 128.39, 126.70, 121.24, 118.86, 115.77, 61.07, 40.26, 37.61, 27.68, 14.48 ppm. **HRMS  $m/z$  (ESI)** calcd for  $[C_{24}H_{27}N_3O_3+Na]^+$  406.2125, found 406.2130.

#### Ethyl (4-(2,4,6-trimethoxybenzyl)phenyl)carbamate (**8p**)

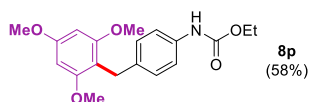

The reaction of 0.3 mmol of imidated *p*-tolylcarbamate **2a** (142.2 mg) and 1,3,5-trimethoxybenzene (**7p**, 100.8 mg) with KOH (33.6 mg) in HFIP (2 mL) at 40 °C in argon afforded 60.3 mg of **8p** (58%) after flash chromatography on silica gel using petroleum ether and ethyl acetate (10:1 to 8:1, *v/v*) as the eluent.

White solid, m.p. 350.6-351.0 °C.  **$^1H$  NMR (CDCl<sub>3</sub>, 400 MHz):**  $\delta$  = 7.20-7.14 (m, 4H), 6.51 (s, 1H), 6.13 (s, 2H), 4.18 (q,  $J$  = 7.1 Hz, 2H), 3.87 (s, 2H), 3.79 (s, 3H), 3.77 (s, 6H), 1.27 (t,  $J$  = 7.1 Hz, 3H) ppm.  **$^{13}C$  NMR (CDCl<sub>3</sub>, 100 MHz):**  $\delta$  = 159.52, 158.68, 153.71, 137.39, 135.14, 128.83, 118.52, 110.17, 90.50, 60.93, 55.60, 55.23, 27.53, 14.49 ppm. **HRMS  $m/z$  (ESI)** calcd for  $[C_{19}H_{23}NO_5+Na]^+$  368.1468, found 368.1467.

## 5) Tandem imidation-alkoxylation from *p*-tolylcarbamates **1** without isolation of **2** (Table 6, 6a-6t)

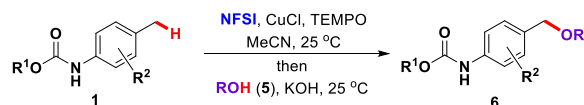

**Typical Procedure:** To a reaction tube charged with CuCl (1.5 mg, 0.015 mmol) and NFSI (189 mg, 0.6 mmol) was added a solution of *p*-tolylcarbamate (**1**, 0.3 mmol) and TEMPO (4.7 mg, 0.03 mmol) in anhydrous acetonitrile (2 mL) under argon (1 atm). After stirring at 25°C for 12 hours, the reaction was quenched with Na<sub>2</sub>CO<sub>3</sub> (2M, aq., 2 mL) and extracted with EtOAc (4 mL). The organic layer was concentrated *in vacuo*, dissolved in alcohols (**5**, 1 mL), and added to a reaction tube charged with KOH (67.2 mg, 1.2 mmol) under argon (1 atm). After stirring at 25°C for another 4 hours, the mixture was concentrated *in vacuo*, followed by purification via flash chromatography on silica gel using petroleum ether and ethyl acetate as the eluent to afford corresponding benzylic ethers **6**.

### Ethyl (4-(methoxymethyl)phenyl)carbamate (**6a**)

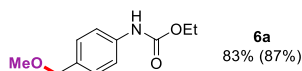

The tandem reaction of 0.3 mmol of ethyl *p*-tolylcarbamate (**1a**, 53.7 mg) as the starting material with methanol (**5a**, 1 mL) afforded 51.8 mg of **6a** (83%) after flash chromatography on silica gel using petroleum ether and ethyl acetate (8:1, *v/v*) as the eluent. For comparison, the 87% yield in parenthesis is calculated by multiplying the 91% yield of **2a** in Table 3 with the 96% yield of **6a** in Table 4.

### Ethyl (4-((hexyloxy)methyl)phenyl)carbamate (**6d**)

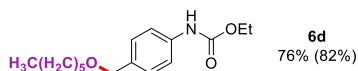

The tandem reaction of 0.3 mmol of ethyl *p*-tolylcarbamate (**1a**, 53.7 mg) as the starting material with hexanol (**5d**, 1 mL) afforded 63.5 mg of **6d** (76%) after flash chromatography on silica gel using petroleum ether and ethyl acetate (8:1, *v/v*) as the eluent. For comparison, the 82% yield in parenthesis is calculated by multiplying the 91% yield of **2a** in Table 3 with the 90% yield of **6d** in Table 4.

### Ethyl (4-(((3-methylbut-2-en-1-yl)oxy)methyl)phenyl)carbamate (**6g**)

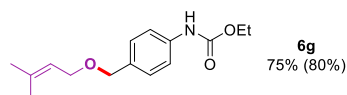

The tandem reaction of 0.3 mmol of ethyl *p*-tolylcarbamate (**1a**, 53.7 mg) as the starting material with 3-methylbut-2-en-1-ol (**5g**, 1 mL) afforded 59.4 mg of **6g** (75%) after flash chromatography on silica gel using petroleum ether and ethyl acetate (8:1, *v/v*) as the eluent. For comparison, the 80% yield in parenthesis is calculated by multiplying the 91% yield of **2a** in Table 3 with the 88% yield of **6g** in Table 4.

#### Ethyl 4-((but-2-yn-1-yloxy)methyl)phenylcarbamate (**6i**)

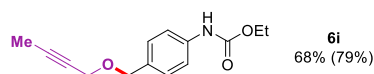

The tandem reaction of 0.3 mmol of ethyl *p*-tolylcarbamate (**1a**, 53.7 mg) as the starting material with but-2-yn-1-ol (**5i**, 1 mL) afforded 50.7 mg of **6i** (68%) after flash chromatography on silica gel using petroleum ether and ethyl acetate (8:1, *v/v*) as the eluent. For comparison, the 79% yield in parenthesis is calculated by multiplying the 91% yield of **2a** in Table 3 with the 87% yield of **6i** in Table 4.

#### Ethyl 4-((2-cyanoethoxy)methyl)phenylcarbamate (**6j**)

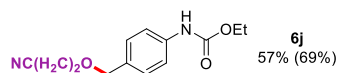

The tandem reaction of 0.3 mmol of ethyl *p*-tolylcarbamate (**1a**, 53.7 mg) as the starting material with 3-hydroxypropanenitrile (**5j**, 1 mL) afforded 42.7 mg of **6j** (57%) after flash chromatography on silica gel using petroleum ether and ethyl acetate (8:1, *v/v*) as the eluent. For comparison, the 69% yield in parenthesis is calculated by multiplying the 91% yield of **2a** in Table 3 with the 76% yield of **6j** in Table 4.

#### Ethyl (*E*)-4-(((3,7-dimethylocta-2,6-dien-1-yl)oxy)methyl)phenylcarbamate (**6m**)

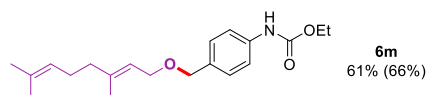

The tandem reaction of 0.3 mmol of ethyl *p*-tolylcarbamate (**1a**, 53.7 mg) as the starting material with (*E*)-3,7-dimethylocta-2,6-dien-1-ol (geraniol, **5m**, 1 mL) afforded 60.9 mg of **6m** (61%) after flash chromatography on silica gel using petroleum ether and ethyl acetate (8:1, *v/v*) as the eluent. For comparison, the 66% yield in parenthesis is calculated by multiplying the 91% yield of **2a** in Table 3 with the 73% yield of **6m** in Table 4.

#### 4-((Ethoxycarbonyl)amino)benzyl acetate (**6p**)

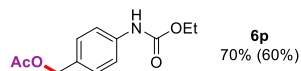

The tandem reaction of 0.3 mmol of ethyl *p*-tolylcarbamate (**1a**, 53.7 mg) as the starting material with sodium acetate (**5p**, 49.2 mg, 0.6 mmol) and KOH (33.6 mg, 0.6 mmol) afforded 49.6 mg of **6p** (70%) after flash chromatography on silica gel using petroleum ether and ethyl acetate (8:1, *v/v*) as the eluent. For comparison, the 60% yield in parenthesis is calculated by multiplying the 91% yield of **2a** in Table 3 with the 66% yield of **6m** in Table 4.

#### Isopropyl (4-(methoxymethyl)phenyl)carbamate (**6q**)

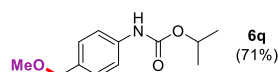

The tandem reaction of 0.3 mmol of isopropyl *p*-tolylcarbamate (57.9 mg, **1h**) as the starting material with methanol (**5a**, 1 mL) afforded 47.7 mg of **6q** (71%) after flash chromatography on silica gel using petroleum ether and ethyl acetate (10:1 to 8:1, *v/v*) as the eluent.

Light-yellow oil.  $^1\text{H NMR}$  ( $\text{CDCl}_3$ , 400 MHz):  $\delta$  = 7.36 (d,  $J$  = 8.2 Hz, 2H), 7.26 (d,  $J$  = 8.5 Hz, 2H), 6.68 (s, 1H), 5.02 (h,  $J$  = 6.3 Hz, 1H), 4.40 (s, 2H), 3.36 (s, 3H), 1.29 (d,  $J$  = 6.3 Hz, 6H) ppm.  $^{13}\text{C NMR}$  ( $\text{CDCl}_3$ , 100 MHz):  $\delta$  = 153.18, 137.59, 132.85, 128.66, 118.42, 74.22, 68.68, 57.83, 22.05 ppm. HRMS  $m/z$  (ESI) calcd for  $[\text{C}_{12}\text{H}_{17}\text{NO}_3+\text{Na}]^+$  246.1101, found 246.1099.

#### *Tert*-Pentyl (4-(methoxymethyl)phenyl)carbamate (**6r**)

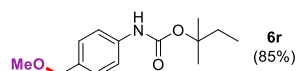

The tandem reaction of 0.3 mmol of *tert*-pentyl *p*-tolylcarbamate (66.3 mg, **1i**) as the starting material with methanol (**5a**, 1 mL) afforded 64.3 mg of **6r** (85%) after flash chromatography on silica gel using petroleum ether and ethyl acetate (10:1 to 8:1, *v/v*) as the eluent.

Light-yellow oil.  $^1\text{H NMR}$  ( $\text{CDCl}_3$ , 400 MHz):  $\delta$  = 7.34 (d,  $J$  = 8.2 Hz, 2H), 7.25 (d,  $J$  = 8.3 Hz, 2H), 6.58 (s, 1H), 4.40 (s, 2H), 3.35 (s, 3H), 1.84 (q,  $J$  = 7.5 Hz, 2H), 1.48 (s, 6H), 0.93 (t,  $J$  = 7.5 Hz, 3H) ppm.  $^{13}\text{C NMR}$  ( $\text{CDCl}_3$ , 100 MHz):  $\delta$  = 152.66, 137.87, 132.60, 128.62, 118.34, 82.92, 74.24, 57.80, 33.57, 25.76, 8.27 ppm. HRMS  $m/z$  (ESI) calcd for  $[\text{C}_{14}\text{H}_{21}\text{NO}_3+\text{Na}]^+$  274.1414, found 274.1416.

### Ethyl (4-(methoxymethyl)-3-methylphenyl)carbamate (**6s**)

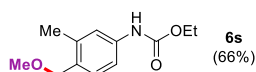

The tandem reaction of 0.3 mmol of ethyl (3,4-dimethylphenyl)carbamate (57.9 mg, **1b**) as the starting material with methanol (**5a**, 1 mL) afforded 44.4 mg of **6s** (66%) after flash chromatography on silica gel using petroleum ether and ethyl acetate (10:1 to 8:1, v/v) as the eluent.

Light-yellow oil.  $^1\text{H NMR}$  ( $\text{CDCl}_3$ , 400 MHz):  $\delta$  = 7.23-7.21 (m, 2H), 7.26 (dd,  $J$  = 8.3 Hz, 2.0 Hz, 1H), 6.66 (s, 1H), 4.40 (s, 2H), 4.21 (q,  $J$  = 7.1 Hz, 2H), 3.37 (s, 3H), 2.31 (s, 3H), 1.30 (t,  $J$  = 7.1 Hz, 3H) ppm.  $^{13}\text{C NMR}$  ( $\text{CDCl}_3$ , 100 MHz):  $\delta$  = 153.57, 137.88, 137.51, 131.05, 129.61, 120.28, 115.68, 72.59, 61.1, 57.91, 18.84, 14.52 ppm. HRMS  $m/z$  (ESI) calcd for  $[\text{C}_{12}\text{H}_{17}\text{NO}_3+\text{Na}]^+$  246.1101, found 246.1101.

### Ethyl (3-fluoro-4-(methoxymethyl)phenyl)carbamate (**6t**)

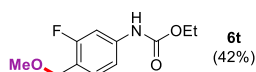

The tandem reaction of 0.3 mmol of ethyl (3-fluoro-4-methylphenyl)carbamate (59.1 mg, **1e**) as the starting material with methanol (**5a**, 1 mL) afforded 28.9 mg of **6t** (42%) after flash chromatography on silica gel using petroleum ether and ethyl acetate (10:1 to 8:1, v/v) as the eluent.

Light-yellow oil.  $^1\text{H NMR}$  ( $\text{CDCl}_3$ , 400 MHz):  $\delta$  = 9.89 (s, 1H), 7.38 (dd,  $J$  = 10.6 Hz, 2.1 Hz, 1H), 7.30 (t,  $J$  = 8.4 Hz, 1H), 7.20 (dd,  $J$  = 8.4 Hz, 2.1 Hz, 1H), 4.36 (s, 2H), 4.13 (q,  $J$  = 7.1 Hz, 2H), 3.25 (s, 3H), 1.25 (t,  $J$  = 7.1 Hz, 3H) ppm.  $^{13}\text{C NMR}$  ( $\text{CDCl}_3$ , 100 MHz):  $\delta$  = 160.44 (d,  $J$  = 241.9 Hz), 153.41, 140.72 (d,  $J$  = 11.2 Hz), 131.03 (d,  $J$  = 6.0 Hz), 118.24 (d,  $J$  = 15.3 Hz), 113.55, 104.58 (d,  $J$  = 26.4 Hz), 67.08 (d,  $J$  = 2.6 Hz), 60.43, 57.35, 14.45 ppm. HRMS  $m/z$  (ESI) calcd for  $[\text{C}_{11}\text{H}_{14}\text{FNO}_3+\text{Na}]^+$  228.1031, found 228.1031.

## 6) Tandem imidation-arylation from *p*-tolylcarbamates **1** without isolation of **2** (Table 6,

### **8a-8s**)

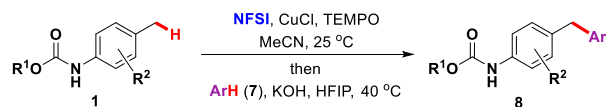

**Typical Procedure:** To a reaction tube charged with CuCl (1.5 mg, 0.015 mmol) and NFSI (189 mg, 0.6 mmol) was added a solution of *p*-tolylcarbamate (**1**, 0.3 mmol) and TEMPO (4.7 mg, 0.03 mmol) in anhydrous acetonitrile (2 mL) under argon (1 atm). After stirring at 25°C for 12 hours, the reaction was quenched with Na<sub>2</sub>CO<sub>3</sub> (2M, aq., 2 mL) and extracted with EtOAc (4 mL). The organic layer was concentrated *in vacuo*, dissolved in HFIP (2 mL), and added to a reaction tube charged with KOH (34.6 mg, 0.6 mmol) and arene (**7**, 0.9 mmol) at 25 °C under argon (1 atm). After stirring at 40°C for another 4 hours, the mixture was concentrated *in vacuo*, followed by purification via flash chromatography on silica gel using petroleum ether and ethyl acetate as the eluent to afford corresponding benzylated arene **8**.

### Ethyl (4-((1*H*-indol-3-yl)methyl)phenyl)carbamate (**8a**)

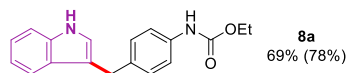

The tandem reaction of 0.3 mmol of ethyl *p*-tolylcarbamate (**1a**, 53.7 mg) as the starting material with 1*H*-indole (**7a**, 105.3 mg) afforded 61.1 mg of **8a** (69%) after flash chromatography on silica gel using petroleum ether and ethyl acetate (10:1 to 8:1, *v/v*) as the eluent. For comparison, the 78% yield in parenthesis is calculated by multiplying the 91% yield of **2a** in Table 3 with the 86% yield of **8a** in Table 5.

### Ethyl (4-((6-fluoro-1*H*-indol-3-yl)methyl)phenyl)carbamate (**8e**)

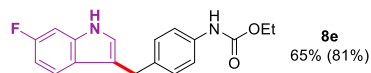

The tandem reaction of 0.3 mmol of ethyl *p*-tolylcarbamate (**1a**, 53.7 mg) as the starting material with 6-fluoro-1*H*-indole (**7e**, 121.5 mg) afforded 61.2 mg of **8e** (65%) after flash chromatography on silica gel using petroleum ether and ethyl acetate (10:1 to 8:1, *v/v*) as the eluent. For comparison, the 81% yield in parenthesis is calculated by multiplying the 91% yield of **2a** in Table 3 with the 89% yield of **8e** in Table 5.

### Ethyl (4-((6-fluoro-1*H*-indol-3-yl)methyl)phenyl)carbamate (**8g**)

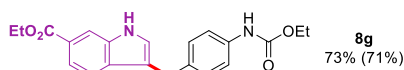

The tandem reaction of 0.3 mmol of ethyl *p*-tolylcarbamate (**1a**, 53.7 mg) as the starting material with ethyl 1*H*-indole-6-carboxylate (**7g**, 170.1 mg) afforded 80.4 mg of **8g** (73%) after flash chromatography on silica gel using petroleum ether and ethyl acetate (6:1 to 3:1, *v/v*) as the eluent. For comparison, the 71% yield in parenthesis is calculated by multiplying the 91% yield of **2a** in Table 3 with the 78% yield of **8g** in Table 5.

#### Ethyl (4-((1-methyl-1*H*-indol-3-yl)methyl)phenyl)carbamate (**8h**)

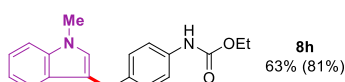

The tandem reaction of 0.3 mmol of ethyl *p*-tolylcarbamate (**1a**, 53.7 mg) as the starting material with 1-methyl-1*H*-indole (**7h**, 117.9 mg) afforded 58.6 mg of **8h** (63%) after flash chromatography on silica gel using petroleum ether and ethyl acetate (10:1 to 8:1, *v/v*) as the eluent. For comparison, the 81% yield in parenthesis is calculated by multiplying the 91% yield of **2a** in Table 3 with the 89% yield of **8h** in Table 5.

#### Ethyl (4-((2,3-dimethyl-3*H*-indol-3-yl)methyl)phenyl)carbamate (**8j**)

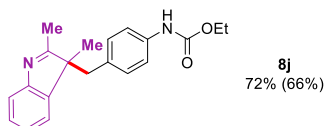

The tandem reaction of 0.3 mmol of ethyl *p*-tolylcarbamate (**1a**, 53.7 mg) as the starting material with 2,3-dimethyl-1*H*-indole (**7j**, 130.6 mg) afforded 69.8 mg of **8j** (72%) after flash chromatography on silica gel using petroleum ether and ethyl acetate (3:1 to 1:1, *v/v*) as the eluent. For comparison, the 66% yield in parenthesis is calculated by multiplying the 91% yield of **2a** in Table 3 with the 73% yield of **8j** in Table 5.

#### Ethyl (4-((3,4-dimethoxythiophen-2-yl)methyl)phenyl)carbamate (**8l**)

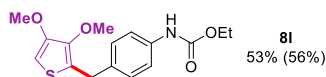

The tandem reaction of 0.3 mmol of ethyl *p*-tolylcarbamate (**1a**, 53.7 mg) as the starting material with 3,4-dimethoxythiophene (**7l**, 129.6 mg) afforded 51.4 mg of **8l** (53%) after flash chromatography on silica gel using petroleum ether and ethyl acetate (8:1, *v/v*) as the eluent. For comparison, the 56% yield in parenthesis is calculated by multiplying the 91% yield of **2a** in Table 3 with the 62% yield of **8l** in Table 5.

### Ethyl (4-((8-pivalamidoquinolin-5-yl)methyl)phenyl)carbamate (**8o**)

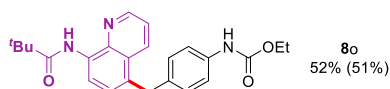

The tandem reaction of 0.3 mmol of ethyl *p*-tolylcarbamate (**1a**, 53.7 mg) as the starting material with *N*-(quinolin-5-yl)pivalamide (**7o**, 205.2 mg) afforded 63.5 mg of **8o** (52%) after flash chromatography on silica gel using petroleum ether and ethyl acetate (8:1 to 6:1, *v/v*) as the eluent. For comparison, the 51% yield in parenthesis is calculated by multiplying the 91% yield of **2a** in Table 3 with the 56% yield of **8o** in Table 5.

### Ethyl (4-(2,4,6-trimethoxybenzyl)phenyl)carbamate (**8p**)

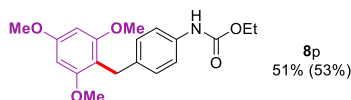

The tandem reaction of 0.3 mmol of ethyl *p*-tolylcarbamate (**1a**, 53.7 mg) as the starting material with 1,3,5-trimethoxybenzene (**7p**, 151.2 mg) afforded 53.1 mg of **8p** (51%) after flash chromatography on silica gel using petroleum ether and ethyl acetate (10:1 to 8:1, *v/v*) as the eluent. For comparison, the 53% yield in parenthesis is calculated by multiplying the 91% yield of **2a** in Table 3 with the 58% yield of **8p** in Table 5.

### Isopropyl (4-((1*H*-indol-3-yl)methyl)phenyl)carbamate (**8q**)

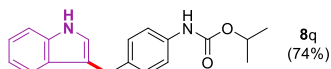

The tandem reaction of 0.3 mmol of isopropyl *p*-tolylcarbamate (**1h**, 57.9 mg) as the starting material with 1*H*-indole (**7a**, 105.3 mg) afforded 68.7 mg of **8q** (74%) after flash chromatography on silica gel using petroleum ether and ethyl acetate (10:1 to 8:1, *v/v*) as the eluent.

White solid, m.p. 129.1-130.0 °C. <sup>1</sup>H NMR (DMSO-*d*<sub>6</sub>, 400 MHz): δ = 10.78 (s, 1H), 9.39 (s, 1H), 7.36-7.28 (m, 4H), 7.14-7.07 (m, 3H), 7.00 (td, *J* = 7.6 Hz, 1.2 Hz, 1H), 6.87 (t, *J* = 7.5 Hz, 1H), 4.82 (h, *J* = 6.2 Hz, 1H), 3.92 (s, 2H), 1.19 (d, *J* = 6.2 Hz, 6H) ppm. <sup>13</sup>C NMR (DMSO-*d*<sub>6</sub>, 100 MHz): δ = 153.18, 136.97, 136.42, 135.56, 128.62, 126.95, 122.97, 120.90, 118.57, 118.21, 114.13, 111.36, 67.23, 30.47, 22.00 ppm. HRMS *m/z* (ESI) calcd for [C<sub>19</sub>H<sub>20</sub>N<sub>2</sub>O<sub>2</sub>+Na]<sup>+</sup> 331.1417, found 331.1425.



### **Tert-Pentyl (4-((1*H*-indol-3-yl)methyl)phenyl)carbamate (8r)**

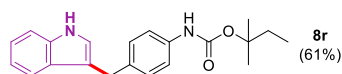

The tandem reaction of 0.3 mmol of *tert*-pentyl *p*-tolylcarbamate (66.3 mg, **1i**) as the starting material with 1*H*-indole (**7a**, 105.3 mg) afforded 61.5 mg of **8r** (61%) after flash chromatography on silica gel using petroleum ether and ethyl acetate (10:1 to 8:1, *v/v*) as the eluent.

Colourless oil. <sup>1</sup>H NMR (DMSO-*d*<sub>6</sub>, 400 MHz): δ = 10.78 (s, 1H), 9.17 (s, 1H), 7.35 (dd, *J* = 8.0 Hz, 1.0 Hz, 1H), 7.30-7.28 (m, 3H), 7.11 (d, *J* = 8.6 Hz, 2H), 7.07 (d, *J* = 2.4 Hz, 1H), 7.00 (td, *J* = 8.2 Hz, 1.1 Hz, 1H), 6.87 (td, *J* = 8.0 Hz, 1.0 Hz, 1H), 3.91 (s, 2H), 1.74 (q, *J* = 7.5 Hz, 2H), 1.37 (s, 6H), 0.84 (t, *J* = 7.5 Hz, 3H) ppm. <sup>13</sup>C NMR (DMSO-*d*<sub>6</sub>, 100 MHz): δ = 152.77, 137.21, 136.43, 135.29, 128.55, 126.95, 122.96, 120.89, 118.58, 118.19, 114.17, 111.36, 80.99, 32.97, 30.47, 25.71, 8.18 ppm. HRMS *m/z* (ESI) calcd for [C<sub>21</sub>H<sub>24</sub>N<sub>2</sub>O<sub>2</sub>+Na]<sup>+</sup> 357.1730, found 359.1727.

### **Ethyl (4-((1*H*-indol-3-yl)methyl)-3-methylphenyl)carbamate (8s)**

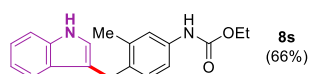

The tandem reaction of 0.3 mmol of ethyl (3,4-dimethylphenyl)carbamate (57.9 mg, **1b**) as the starting material with 1*H*-indole (**7a**, 105.3 mg) afforded 61.6 mg of **8s** (66%) after flash chromatography on silica gel using petroleum ether and ethyl acetate (10:1 to 8:1, *v/v*) as the eluent.

Colourless oil. <sup>1</sup>H NMR (DMSO-*d*<sub>6</sub>, 400 MHz): δ = 10.77 (s, 1H), 9.40 (s, 1H), 7.38 (dd, *J* = 7.9 Hz, 1.0 Hz, 1H), 7.30 (d, *J* = 8.1 Hz, 1H), 7.22-7.14 (m, 2H), 7.03-6.99 (m, 2H), 6.91-6.87 (m, 2H), 4.06 (q, *J* = 7.1 Hz, 2H), 3.90 (s, 2H), 2.20 (s, 3H), 1.19 (t, *J* = 7.1 Hz, 3H) ppm. <sup>13</sup>C NMR (DMSO-*d*<sub>6</sub>, 100 MHz): δ = 153.59, 137.00, 136.41, 136.12, 133.48, 129.33, 127.09, 123.13, 120.91, 119.91, 118.55, 118.22, 115.75, 113.13, 111.40, 59.97, 28.23, 19.45, 14.57 ppm. HRMS *m/z* (ESI) calcd for [C<sub>19</sub>H<sub>20</sub>N<sub>2</sub>O<sub>2</sub>+Na]<sup>+</sup> 331.1417, found 331.1419.

## 7) Applications to the preparation of key intermediates for the synthesis of bioactive molecules (Scheme 2)

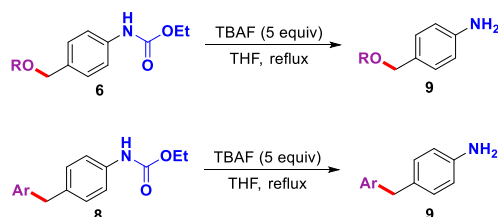

**Typical Procedure for deprotection:** To a reaction tube charged with benzyl ether **6** or benzylated arene **8** (0.3 mmol) was added a solution of Bu<sub>4</sub>NF (1.5 mL of 1.0 M solution in THF, 1.5mmol) under argon (1 atm). After stirring under reflux for 12 hours, the mixture was concentrated *in vacuo*, followed by purification via flash chromatography on silica gel using petroleum ether and ethyl acetate as the eluent to afford corresponding aniline **9**.

### 4-(Methoxymethyl)aniline (**9a**)

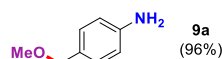

The deprotection of 0.3 mmol of ethyl (4-(methoxymethyl)phenyl)carbamate (62.7 mg, **6a**) afforded 39.6 mg of **9a** (96%) after flash chromatography on silica gel using petroleum ether and ethyl acetate (6:1, v/v) as the eluent.

White solid, m.p. 166.8-167.4 °C. <sup>1</sup>H NMR (DMSO-d<sub>6</sub>, 400 MHz): δ = 6.92 (d, *J* = 8.4 Hz, 2H), 6.48 (d, *J* = 8.4 Hz, 2H), 5.01 (s, 2H), 4.14 (s, 2H), 3.15 (s, 3H) ppm. <sup>13</sup>C NMR (DMSO-d<sub>6</sub>, 100 MHz): δ = 148.22, 129.26, 124.96, 113.48, 73.94, 56.72 ppm. HRMS *m/z* (ESI) calcd for [C<sub>8</sub>H<sub>11</sub>NO+H]<sup>+</sup> 138.0913, found 138.0910.

### 4-(Ethoxymethyl)aniline (**9b**)

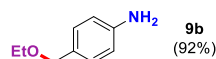

The deprotection of 0.3 mmol of ethyl (4-(ethoxymethyl)phenyl)carbamate (66.9 mg, **6b**) afforded 41.9 mg of **9b** (92%) after flash chromatography on silica gel using petroleum ether and ethyl acetate (6:1, v/v) as the eluent.

Colourless oil. <sup>1</sup>H NMR (CDCl<sub>3</sub>, 400 MHz): δ = 7.12 (d, *J* = 8.3 Hz, 2H), 6.63 (d, *J* = 8.4 Hz, 2H), 4.37 (s, 2H), 3.58 (brs, 2H), 3.49 (q, *J* = 7.0 Hz, 2H), 1.21 (t, *J* = 7.0 Hz, 3H) ppm. <sup>13</sup>C NMR (CDCl<sub>3</sub>, 100 MHz): δ = 145.89, 129.32, 128.27, 114.85, 72.52, 65.08, 15.15 ppm. HRMS *m/z* (ESI) calcd for [C<sub>9</sub>H<sub>13</sub>NO+H]<sup>+</sup> 152.1070, found 152.1067.

#### 4-(2,4,6-Trimethoxybenzyl)aniline (**9p**)

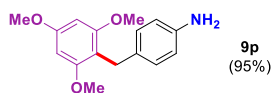

The deprotection of 0.3 mmol of ethyl (4-(2,4,6-trimethoxybenzyl)phenyl)carbamate (103.5 mg, **8p**) afforded 78.1 mg of **9p** (95%) after flash chromatography on silica gel using petroleum ether and ethyl acetate (3:1, *v/v*) as the eluent.

Light-yellow solid, m.p. 110.0-110.7 °C. <sup>1</sup>H NMR (CDCl<sub>3</sub>, 400 MHz): δ = 7.04 (d, *J* = 8.4 Hz, 2H), 6.55 (d, *J* = 8.3 Hz, 2H), 6.14 (s, 2H), 3.82 (s, 2H), 3.79 (s, 2H), 3.79 (s, 3H), 3.77 (s, 6H) ppm. <sup>13</sup>C NMR (CDCl<sub>3</sub>, 100 MHz): δ = 159.35, 158.70, 143.67, 132.42, 129.09, 115.03, 110.86, 90.55, 55.64, 55.63, 55.25, 27.27 ppm. HRMS *m/z* (ESI) calcd for [C<sub>9</sub>H<sub>13</sub>NO+H]<sup>+</sup> 152.1070, found 152.1067.

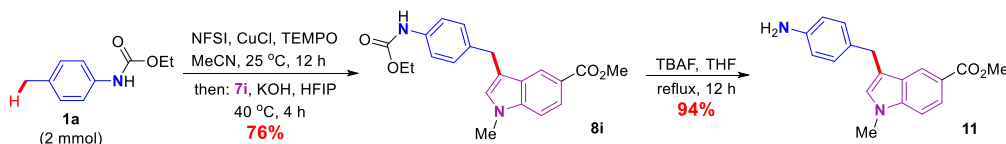

**Typical Procedure:** To a reaction tube charged with CuCl (9.9 mg, 0.1 mmol) and NFSI (1.26 g, 4 mmol) was added a solution of ethyl *p*-tolylcarbamate (**1a**, 358.2 mg, 2 mmol) and TEMPO (31.3 mg, 0.2 mmol) in anhydrous acetonitrile (10 mL) under argon (1 atm). After stirring at 25°C for 12 hours, the reaction was quenched with Na<sub>2</sub>CO<sub>3</sub> (2M, aq., 2 mL) and extracted with EtOAc (4 mL). The organic layer was concentrated *in vacuo*, dissolved in HFIP (12 mL), and added to a reaction tube charged with KOH (224.4 mg, 4 mmol) and methyl 1-methyl-1*H*-indole-5-carboxylate (**7i**, 756.3 mg, 4 mmol) at 25 °C under argon (1 atm). After stirring at 40°C for another 4 hours, the mixture was concentrated *in vacuo*, followed by purification via flash chromatography on silica gel using petroleum ether and ethyl acetate as the eluent to afford 556.4 mg of methyl 3-(4-((ethoxycarbonyl)amino)benzyl)-1-methyl-1*H*-indole-5-carboxylate (**8i**, 76%).

Subsequently, to a reaction tube charged with the above **8i** (556.4 mg, 1.52 mmol) was added a solution of Bu<sub>4</sub>NF (10 mL of 1.0 M solution in THF, 10 mmol) under argon (1 atm). After stirring under reflux for 12 hours, the mixture was concentrated *in vacuo*, followed by purification via flash chromatography on silica gel using petroleum ether and ethyl acetate as the effluent to afford 420.6 mg of methyl 3-(4-aminobenzyl)-1-methyl-1*H*-indole-5-carboxylate (**11**, 94%).

#### Methyl 3-(4-aminobenzyl)-1-methyl-1*H*-indole-5-carboxylate (**11**)

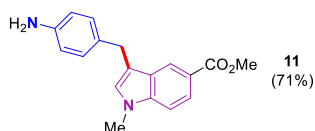

Synthesis of key intermediate **11** from 0.3 mmol of ethyl *p*-tolylcarbamate (**1a**, 358.2 mg, 2 mmol) afforded 420.6 mg of **11** (71% total yield from **1a**) after flash chromatography on silica gel using petroleum ether and ethyl acetate (3:1, *v/v*) as the eluent. For comparison, the literature reported total yield of the identical intermediate from the same amount of starting material is 53%.

White solid, m.p. 149.4-150.0 °C. **<sup>1</sup>H NMR (DMSO-*d*<sub>6</sub>, 400 MHz)**: δ = 8.08 (d, *J* = 1.6 Hz, 1H), 7.71 (dd, *J* = 8.6 Hz, 1.6 Hz, 1H), 7.42 (d, *J* = 8.6 Hz, 1H), 7.13 (s, 1H), 6.87 (d, *J* = 8.4 Hz, 2H), 6.44 (d, *J* = 8.4 Hz, 2H), 4.80 (s, 2H), 3.85 (s, 2H), 3.78 (s, 3H), 3.73 (s, 3H) ppm. **<sup>13</sup>C NMR (DMSO-*d*<sub>6</sub>, 100 MHz)**: δ = 167.23, 146.54, 139.20, 129.17, 128.75, 127.95, 126.87, 121.95, 121.40, 119.69, 116.05, 113.94, 109.59, 51.65, 32.43, 29.74 ppm. **HRMS *m/z* (ESI)** calcd for [C<sub>18</sub>H<sub>18</sub>N<sub>2</sub>O<sub>2</sub>+H]<sup>+</sup> 317.1261, found 317.1261.

## Control Experiments

### 1) To demonstrate the crucial role of the carbamate directing group (Scheme 3)

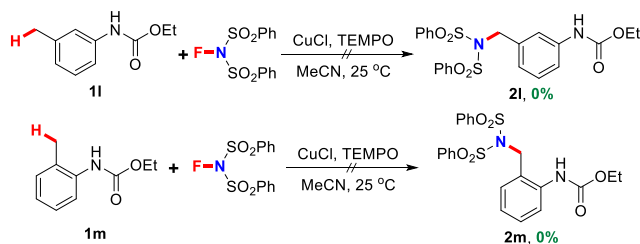

**Experimental Procedure:** To a reaction tube charged with CuCl (1.5 mg, 0.015 mmol) and NFSI (189 mg, 0.6 mmol) was added a solution of TEMPO (4.7 mg, 0.03 mmol) and ethyl *m*-tolylcarbamate (**1l**, 53.7 mg, 0.3 mmol) or ethyl *o*-tolylcarbamate (**1m**, 53.7 mg, 0.3 mmol) in anhydrous acetonitrile (2 mL) under argon (1 atm). After stirring at 25°C for 12 hours, no corresponding benzylic imidated product **2l** or **2m** could be observed on GC-MS.

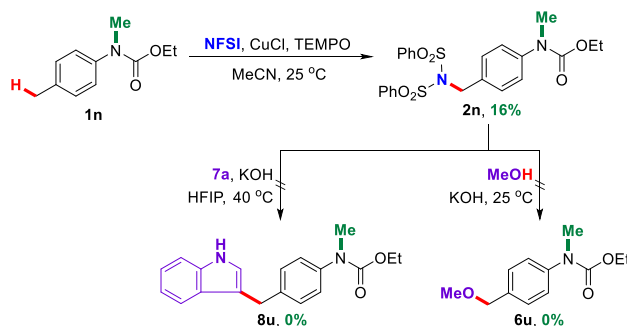

**Experimental Procedure:** To a reaction tube charged with CuCl (1.5 mg, 0.015 mmol) and NFSI (189 mg, 0.6 mmol) was added a solution of ethyl methyl(*p*-tolyl)carbamate (**1n**, 57.9 mg, 0.3 mmol) and TEMPO (4.7 mg, 0.03 mmol) in anhydrous acetonitrile (2 mL) under argon (1 atm). After stirring at 25°C for 12 hours, the mixture was concentrated *in vacuo* to give dark residue, which was purified by flash chromatography on silica gel using petroleum ether and ethyl acetate as the eluent to afford 23.6 mg of **2n** (16%).

To a reaction tube charged with imidated *p*-tolylcarbamate **2n** (146.4 mg, 0.3 mmol) was added a suspension of KOH (67.2 mg, 1.2 mmol) in methanol (**5a**, 1 mL) under argon (1 atm). After stirring at 25°C for 4 hours, no corresponding benzyl ether **6u** could be observed on GC-MS.

To a reaction tube charged with imidated *p*-tolylcarbamate **2n** (146.4 mg, 0.3 mmol) and KOH (33.6 mg, 0.6 mmol) was added a solution of 1*H*-indole (**7a**, 70.2 mg, 0.6 mmol) in HFIP (2 mL) under argon (1 atm). After stirring at 40°C for 4 hours, no corresponding benzylated indole **8u** could be observed on GC-MS.

### Ethyl methyl(4-((*N*-(phenylsulfonyl)phenylsulfonamido)methyl)phenyl)carbamate (**2n**)

The reaction of 0.3 mmol of ethyl methyl(*p*-tolyl)carbamate (**1n**, 57.9 mg) and NFSI (189 mg) with CuCl (1.5 mg) and TEMPO (4.7 mg) at 25 °C in argon afforded 23.6 mg of **2n** (16%) after flash chromatography on silica gel using petroleum ether and ethyl acetate (6:1 to 3:1, *v/v*) as the eluent.

White solid, m.p. 137.0-137.9 °C. <sup>1</sup>H NMR (CDCl<sub>3</sub>, 400 MHz): δ = 7.77-7.75 (m, 4H), 7.55-7.51 (m, 2H), 7.41-7.37 (m, 4H), 7.31 (d, *J* = 8.5 Hz, 2H), 7.08 (d, *J* = 8.4 Hz, 2H), 4.89 (s, 2H), 4.16 (q, *J* = 7.1 Hz, 2H), 3.25 (s, 1H), 1.23 (t, *J* = 7.1 Hz, 3H) ppm. <sup>13</sup>C NMR (CDCl<sub>3</sub>, 100 MHz): δ = 155.33, 143.16, 139.77, 133.52, 129.55, 129.35, 128.69, 127.89, 125.26, 61.63, 51.84, 37.41, 14.50 ppm. HRMS *m/z* (ESI) calcd for [C<sub>23</sub>H<sub>24</sub>N<sub>2</sub>O<sub>6</sub>S<sub>2</sub>+Na]<sup>+</sup> 511.0968, found 511.0964.

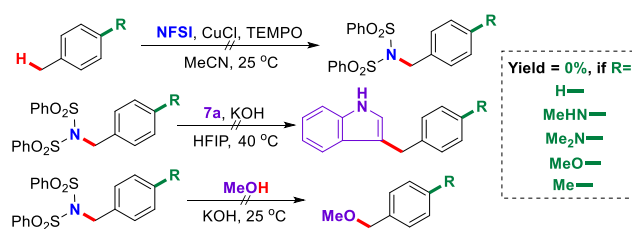

**Experimental Procedure:** To a reaction tube charged with CuCl (1.5 mg, 0.015 mmol) and NFSI (189 mg, 0.6 mmol) was added a solution of TEMPO (4.7 mg, 0.03 mmol) and toluene, *N*,4-dimethylaniline, *N,N*,4-trimethylaniline, 1-methoxy-4-methylbenzene or *p*-xylene (0.3 mmol) in anhydrous acetonitrile (2 mL) under argon (1 atm). After stirring at 25°C for 12 hours, no corresponding benzylic imidated product could be observed on GC-MS.

To a reaction tube charged with *N*-benzyl-*N*-(phenylsulfonyl)benzenesulfonamide, *N*-(4-methylbenzyl)-*N*-(phenylsulfonyl)benzenesulfonamide or *N*-(4-methoxybenzyl)-*N*-(phenylsulfonyl)benzenesulfonamide (0.3 mmol) was added a suspension of KOH (67.2 mg, 1.2 mmol) in methanol (**5a**, 1 mL) under argon (1 atm). After stirring at 25°C for 4 hours, no corresponding benzyl ether could be observed on GC-MS.

To a reaction tube charged with *N*-benzyl-*N*-(phenylsulfonyl)benzenesulfonamide, *N*-(4-methylbenzyl)-*N*-(phenylsulfonyl)benzenesulfonamide or *N*-(4-methoxybenzyl)-*N*-(phenylsulfonyl)benzenesulfonamide (0.3 mmol) and KOH (33.6 mg, 0.6 mmol) was added a solution of 1*H*-indole (**7a**, 70.2 mg, 0.6 mmol) in HFIP (2 mL) under argon (1 atm). After stirring at 40°C for 4 hours, no corresponding benzylated indole

could be observed on GC-MS.

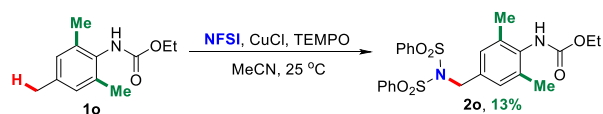

**Experimental Procedure:** To a reaction tube charged with CuCl (1.5 mg, 0.015 mmol) and NFSI (189 mg, 0.6 mmol) was added a solution of ethyl mesitylcarbamate (**1o**, 62.1 mg, 0.3 mmol) and TEMPO (4.7 mg, 0.03 mmol) in anhydrous acetonitrile (2 mL) under argon (1 atm). After stirring at 25°C for 12 hours, the mixture was concentrated *in vacuo* to give dark residue, which was purified by flash chromatography on silica gel using petroleum ether and ethyl acetate as the eluent to afford 19.3 mg of **2o** (13%).

#### Ethyl (2,6-dimethyl-4-((N-(phenylsulfonyl)phenylsulfonamido)methyl)phenyl)carbamate (**2o**)

The reaction of 0.3 mmol of ethyl methyl(*p*-tolyl)carbamate (**1o**, 62.1 mg) and NFSI (189 mg) with CuCl (1.5 mg) and TEMPO (7.0 mg) at 25 °C in argon afforded 19.3 mg of **2o** (13%) after flash chromatography on silica gel using petroleum ether and ethyl acetate (6:1 to 3:1, *v/v*) as the eluent.

Light-yellow oil. <sup>1</sup>H NMR (CDCl<sub>3</sub>, 400 MHz): δ = 7.80-7.78 (m, 4H), 7.60-7.56 (m, 2H), 7.48-7.44 (m, 4H), 6.98 (s, 2H), 5.96 (s, 1H), 4.87 (s, 2H), 4.22 (q, *J* = 7.1 Hz, 2H), 2.14 (s, 6H), 1.25 (t, *J* = 7.1 Hz, 3H) ppm. <sup>13</sup>C NMR (CDCl<sub>3</sub>, 100 MHz): δ = 154.26, 139.84, 135.88, 133.57, 132.83, 128.74, 128.58, 128.03, 60.30, 52.13, 18.11, 14.59 ppm. HRMS *m/z* (ESI) calcd for [C<sub>24</sub>H<sub>26</sub>N<sub>2</sub>O<sub>6</sub>S<sub>2</sub>+Na]<sup>+</sup> 525.1125, found 525.1129.

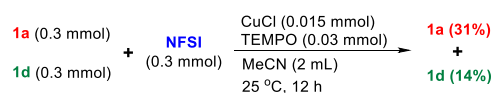

**Experimental Procedure:** To a reaction tube charged with CuCl (1.5 mg, 0.015 mmol) and NFSI (94.6 mg, 0.3 mmol) was added a solution of ethyl *p*-tolylcarbamate (**1a**, 53.7 mg, 0.3 mmol), ethyl (2,4-dimethylphenyl)carbamate (**1d**, 57.9 mg, 0.3 mmol) and TEMPO (4.7 mg, 0.03 mmol) in anhydrous acetonitrile (2 mL) under argon (1 atm). After stirring at 25°C for 12 hours, the mixture was concentrated *in vacuo* to give dark residue, which was purified by flash chromatography on silica gel using petroleum ether and ethyl acetate as the eluent to afford 44.3 mg of **2a** (31%) and 20.7 mg of **2d** (14%).

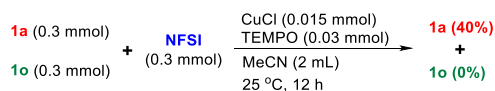

**Experimental Procedure:** To a reaction tube charged with CuCl (1.5 mg, 0.015 mmol) and NFSI (94.6 mg,

0.3 mmol) was added a solution of ethyl *p*-tolylcarbamate (**1a**, 53.7 mg, 0.3 mmol), ethyl mesitylcarbamate (**1o**, 62.1 mg, 0.3 mmol) and TEMPO (4.7 mg, 0.03 mmol) in anhydrous acetonitrile (2 mL) under argon (1 atm). After stirring at 25°C for 12 hours, the mixture was concentrated *in vacuo* to give dark residue, which was purified by flash chromatography on silica gel using petroleum ether and ethyl acetate as the eluent to afford 57.2 mg of **2a** (40%), whereas no **2o** could be observed on GC-MS.



## 2) To indicate some key differences compared to the previous palladium-catalysed benzylic C-H imidation with NFSI (Scheme 4)

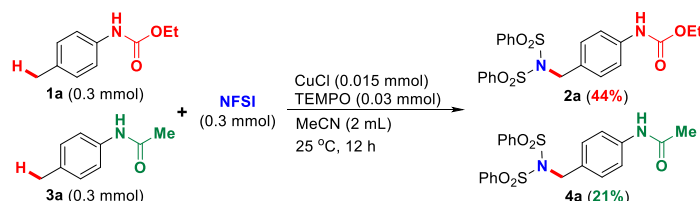

**Experimental Procedure:** To a reaction tube charged with CuCl (1.5 mg, 0.015 mmol) and NFSI (94.6 mg, 0.3 mmol) was added a solution of ethyl *p*-tolylcarbamate (**1a**, 53.7 mg, 0.3 mmol), *N*-(*p*-tolyl)acetamide (**3a**, 44.7 mg, 0.3 mmol) and TEMPO (4.7 mg, 0.03 mmol) in anhydrous acetonitrile (2 mL) under argon (1 atm). After stirring at 25°C for 12 hours, the mixture was concentrated *in vacuo* to give dark residue, which was purified by flash chromatography on silica gel using petroleum ether and ethyl acetate as the eluent to afford 62.9 mg of **2a** (44%) and 27.6 mg of **4a** (21%).

### *N*-(4-((*N*-(Phenylsulfonyl)phenylsulfonamido)methyl)phenyl)acetamide (**4a**)

White solid, m.p. 164.5-165.0 °C. <sup>1</sup>H NMR (DMSO-*d*<sub>6</sub>, 400 MHz): δ = 9.99 (s, 1H), 7.80-7.71 (m, 6H), 7.59-7.52 (m, 6H), 7.25 (d, *J* = 8.5 Hz, 2H), 4.97 (s, 2H), 2.08 (s, 3H) ppm. <sup>13</sup>C NMR (CDCl<sub>3</sub>, 100 MHz): δ = 168.73, 139.69, 137.92, 133.71, 130.06, 129.75, 128.83, 127.94, 119.61, 51.95, 24.44 ppm. HRMS *m/z* (ESI) calcd for [C<sub>21</sub>H<sub>20</sub>N<sub>2</sub>O<sub>5</sub>S<sub>2</sub>+H]<sup>+</sup> 445.0886, found 445.0884.

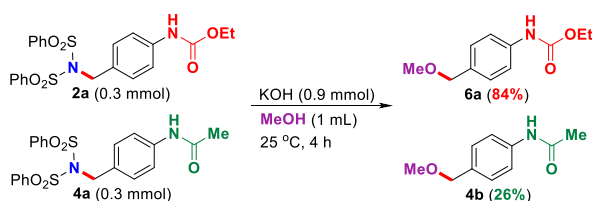

**Experimental Procedure:** To a reaction tube charged with the imidated *p*-tolylcarbamate **2a** (142.2 mg, 0.3 mmol) and the imidated *p*-tolylacetamide **4a** (133.2 mg, 0.3 mmol) was added a suspension of KOH (50.5 mg, 0.9 mmol) in methanol (**5a**, 1 mL) under argon (1 atm). After stirring at 25°C for 4 hours, the mixture was concentrated *in vacuo* to give dark residue, which was purified by flash chromatography on silica gel using petroleum ether and ethyl acetate as the eluent to afford 52.9 mg of **6a** (84%) and 13.8 mg of **4b** (26%).

### *N*-(4-(Methoxymethyl)phenyl)acetamide (**4b**)

White solid, m.p. 98.0-98.5 °C. <sup>1</sup>H NMR (CDCl<sub>3</sub>, 400 MHz): δ = 7.48 (d, *J* = 8.3 Hz, 2H), 7.36 (s, 1H), 7.28 (d, *J* = 8.3 Hz, 2H), 4.41 (s, 2H), 3.37 (s, 3H), 2.17 (s, 3H) ppm. <sup>13</sup>C NMR (CDCl<sub>3</sub>, 100 MHz): δ = 168.31,

137.34, 134.05, 128.53, 119.75, 74.21, 57.96, 24.58 ppm. **HRMS  $m/z$  (ESI)** calcd for  $[C_{10}H_{13}NO_2+Na]^+$  202.0839, found 202.0837.

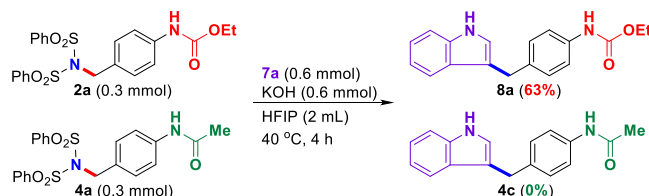

**Experimental Procedure:** To a reaction tube charged with the imidated *p*-tolylcarbamate **2a** (142.2 mg, 0.3 mmol), the imidated *p*-tolylacetamide **4a** (133.2 mg, 0.3 mmol) and KOH (33.6 mg, 0.6 mmol) was added a solution of *1H*-indole (**7a**, 70.2 mg, 0.6 mmol) in HFIP (2 mL) under argon (1 atm). After stirring at 40°C for 4 hours, the mixture was concentrated *in vacuo* to give dark residue, which was purified by flash chromatography on silica gel using petroleum ether and ethyl acetate as the eluent to afford 55.7 mg of **8a** (63%), whereas no **4c** could be observed on GC-MS.

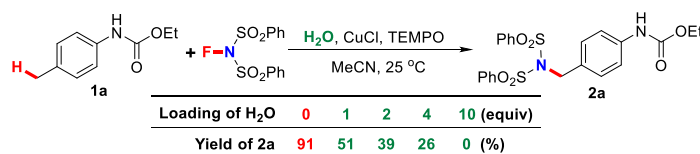

**Experimental Procedure:** To a reaction tube charged with CuCl (1.5 mg, 0.015 mmol) and NFSI (189 mg, 0.6 mmol) was added a solution of ethyl *p*-tolylcarbamate (**1a**, 53.7 mg, 0.3 mmol), H<sub>2</sub>O (6 μL, 0.3 mmol) and TEMPO (4.7 mg, 0.03 mmol) in anhydrous acetonitrile (2 mL) under argon (1 atm). After stirring at 25°C for 12 hours, the mixture was concentrated *in vacuo* to give dark residue, which was purified by flash chromatography on silica gel using petroleum ether and ethyl acetate as the eluent to afford corresponding 72.8 mg of the benzylic imidated *p*-tolylcarbamate **2a** (51%).

To a reaction tube charged with CuCl (1.5 mg, 0.015 mmol) and NFSI (189 mg, 0.6 mmol) was added a solution of ethyl *p*-tolylcarbamate (**1a**, 53.7 mg, 0.3 mmol), H<sub>2</sub>O (11 μL, 0.6 mmol) and TEMPO (4.7 mg, 0.03 mmol) in anhydrous acetonitrile (2 mL) under argon (1 atm). After stirring at 25°C for 12 hours, the mixture was concentrated *in vacuo* to give dark residue, which was purified by flash chromatography on silica gel using petroleum ether and ethyl acetate as the eluent to afford corresponding 55.2 mg of the benzylic imidated *p*-tolylcarbamate **2a** (39%).

To a reaction tube charged with CuCl (1.5 mg, 0.015 mmol) and NFSI (189 mg, 0.6 mmol) was added a solution of ethyl *p*-tolylcarbamate (**1a**, 53.7 mg, 0.3 mmol), H<sub>2</sub>O (22 μL, 1.2 mmol) and TEMPO (4.7 mg,

0.03 mmol) in anhydrous acetonitrile (2 mL) under argon (1 atm). After stirring at 25°C for 12 hours, the mixture was concentrated *in vacuo* to give dark residue, which was purified by flash chromatography on silica gel using petroleum ether and ethyl acetate as the eluent to afford corresponding 37.3 mg of the benzylic imidated *p*-tolylcarbamate **2a** (26%).

To a reaction tube charged with CuCl (1.5 mg, 0.015 mmol) and NFSI (189 mg, 0.6 mmol) was added a solution of ethyl *p*-tolylcarbamate (**1a**, 53.7 mg, 0.3 mmol), H<sub>2</sub>O (54 μL, 3 mmol) and TEMPO (4.7 mg, 0.03 mmol) in anhydrous acetonitrile (2 mL) under argon (1 atm). After stirring at 25°C for 12 hours, no benzylic imidated *p*-tolylcarbamate **2a** could be observed on GC-MS.

### 3) To support the radical pathway proposed in Scheme 5

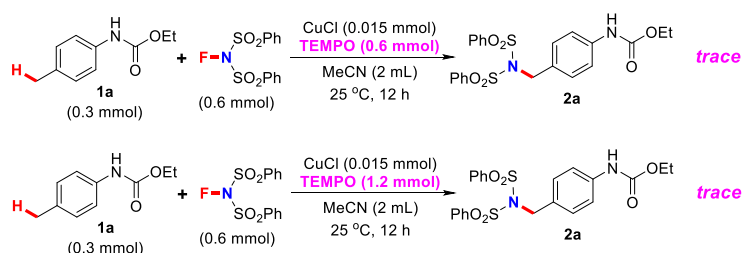

**Experimental Procedure:** To a reaction tube charged with CuCl (1.5 mg, 0.015 mmol) and NFSI (189 mg, 0.6 mmol) was added a solution of TEMPO (93.8 mg, 0.6 mmol) and ethyl *p*-tolylcarbamate (**1a**, 53.7 mg, 0.3 mmol) in anhydrous acetonitrile (2 mL) under argon (1 atm). After stirring at 25°C for 12 hours, only trace amount of benzylic imidated product **2a** could be observed on TLC.

To a reaction tube charged with CuCl (1.5 mg, 0.015 mmol) and NFSI (189 mg, 0.6 mmol) was added a solution of TEMPO (187.5 mg, 1.2 mmol) and ethyl *p*-tolylcarbamate (**1a**, 53.7 mg, 0.3 mmol) in anhydrous acetonitrile (2 mL) under argon (1 atm). After stirring at 25°C for 12 hours, only trace amount of benzylic imidated product **2a** could be observed on TLC.

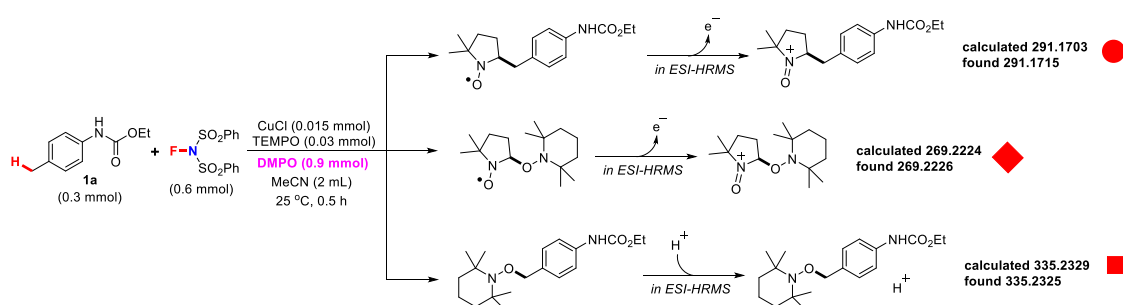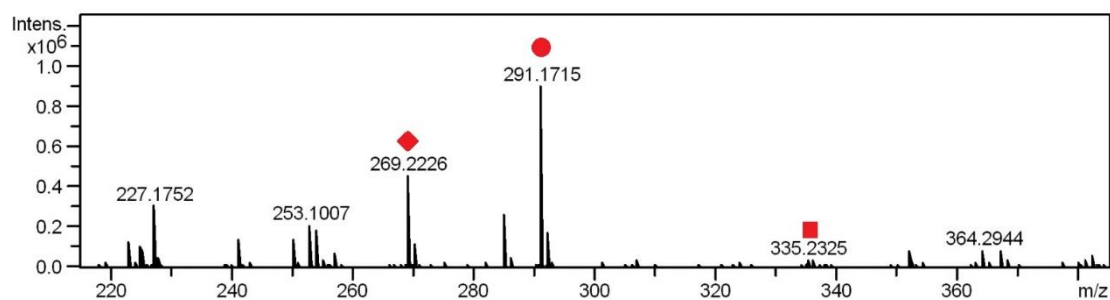

**Experimental Procedure:** To a reaction tube charged with CuCl (1.5 mg, 0.015 mmol) and NFSI (189 mg, 0.6 mmol) was added a solution of TEMPO (4.7 mg, 0.03 mmol) and ethyl *p*-tolylcarbamate (**1a**, 53.7 mg, 0.3 mmol) in anhydrous acetonitrile (1 mL) under argon (1 atm). Then a solution of DMPO (101.8 mg, 0.9 mmol) in anhydrous acetonitrile (1 mL) was added immediately. After stirring at 25°C for 30 minutes, the reaction mixture was investigated by ESI-HRMS.

**The DMPO adduct of the benzylic radical:** calcd for  $[\text{C}_{16}\text{H}_{23}\text{N}_2\text{O}_3]^+$  291.1703, found 291.1715.

**The DMPO adduct of TEMPO:** calcd for  $[\text{C}_{15}\text{H}_{29}\text{N}_2\text{O}_2]^+$  269.2224, found 269.2226.

**The TEMPO adduct of the benzylic radical:** calcd for  $[\text{C}_{19}\text{H}_{30}\text{N}_2\text{O}_3+\text{H}]^+$  335.2329, found 335.2325.

7.7995  
7.7808  
7.7783  
7.5661  
7.5474  
7.5288  
7.4293  
7.4092  
7.3900  
7.2998  
7.2785  
7.2575  
7.2355  
6.8683

4.8795  
4.2392  
4.2214  
4.2037  
4.1859

1.3067  
1.2889  
1.2712

0.0000

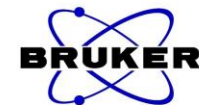

```

NAME      CLJ-WL-SZ019
EXPNO     1
PROCNO    1
Date_     20190527
Time      19.24
INSTRUM   spect
PROBHD    5 mm PABBO BB/
PULPROG   zg30
TD         65536
SOLVENT   CDCl3
NS         8
DS         0
SWH       8012.820 Hz
FIDRES    0.122266 Hz
AQ         4.0894966 sec
RG         18.6
DW         62.400 usec
DE         6.50 usec
TE         300.6 K
D1         1.00000000 sec
TDO        1
  
```

```

===== CHANNEL f1 =====
SFO1     400.1324710 MHz
NUC1      1H
P1        8.04 usec
SI        65536
SF        400.1300093 MHz
WDW       EM
SSB       0
LB        0.30 Hz
GB         0
PC         1.00
  
```

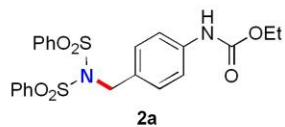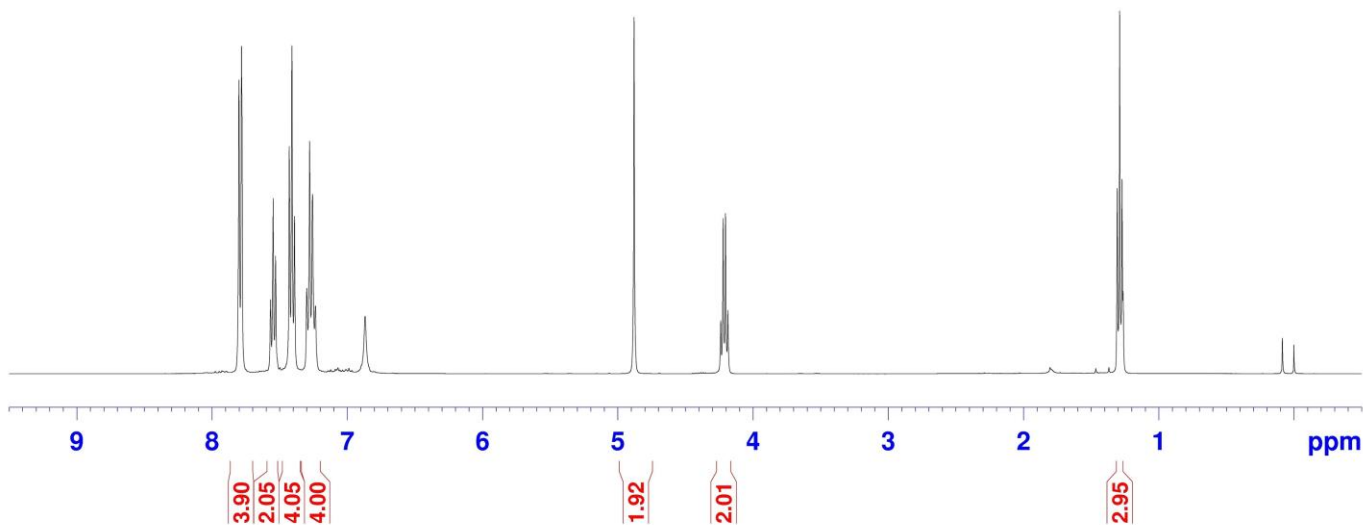

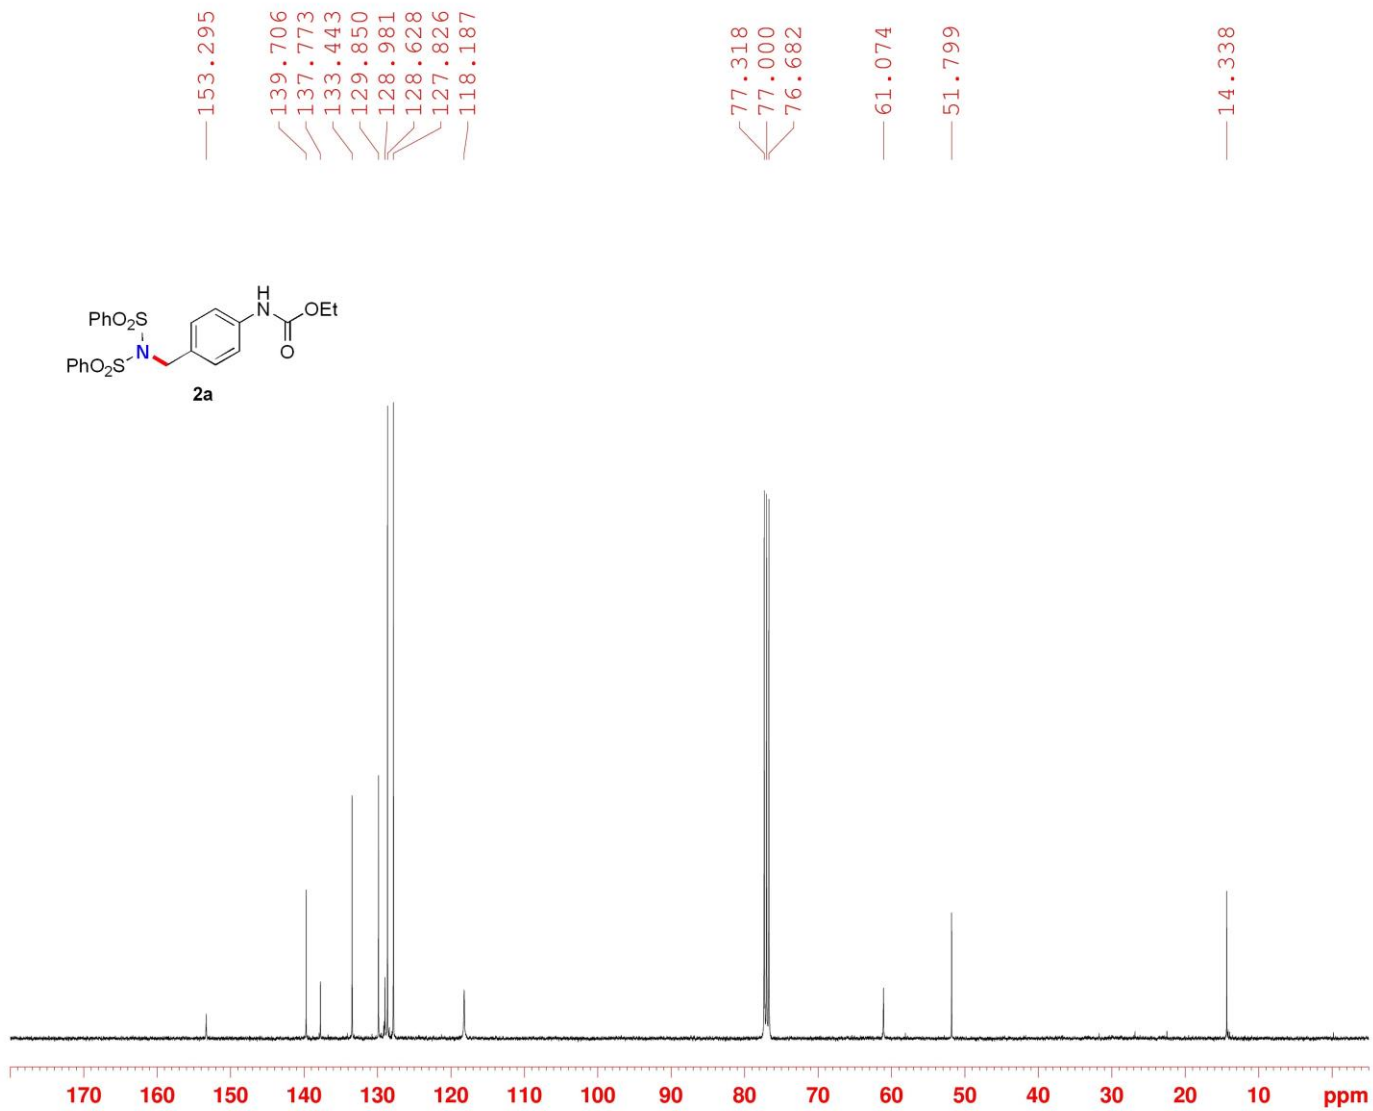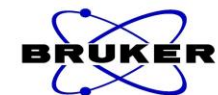

```

NAME      2019-08-22 shaozhong-S2078
EXPNO    1
PROCNO   1
Date_    20190822
Time     11.29 h
INSTRUM  spect
PROBHD   E116098_0673 (
PULPROG  zgpg30
TD       65536
SOLVENT  CDCl3
NS       512
DS       4
SWH      24038.461 Hz
FIDRES   0.733596 Hz
AQ       1.3631988 sec
RG       203.48
DW       20.800 usec
DE       6.50 usec
TE       295.0 K
D1       2.0000000 sec
D11      0.03000000 sec
TDO      1
SFO1     100.6228298 MHz
NUC1     13C
P1       10.00 usec
SI       32768
SF       100.6127944 MHz
WDW      EM
SSB      0
LB       1.00 Hz
GB       0
PC       1.40
  
```

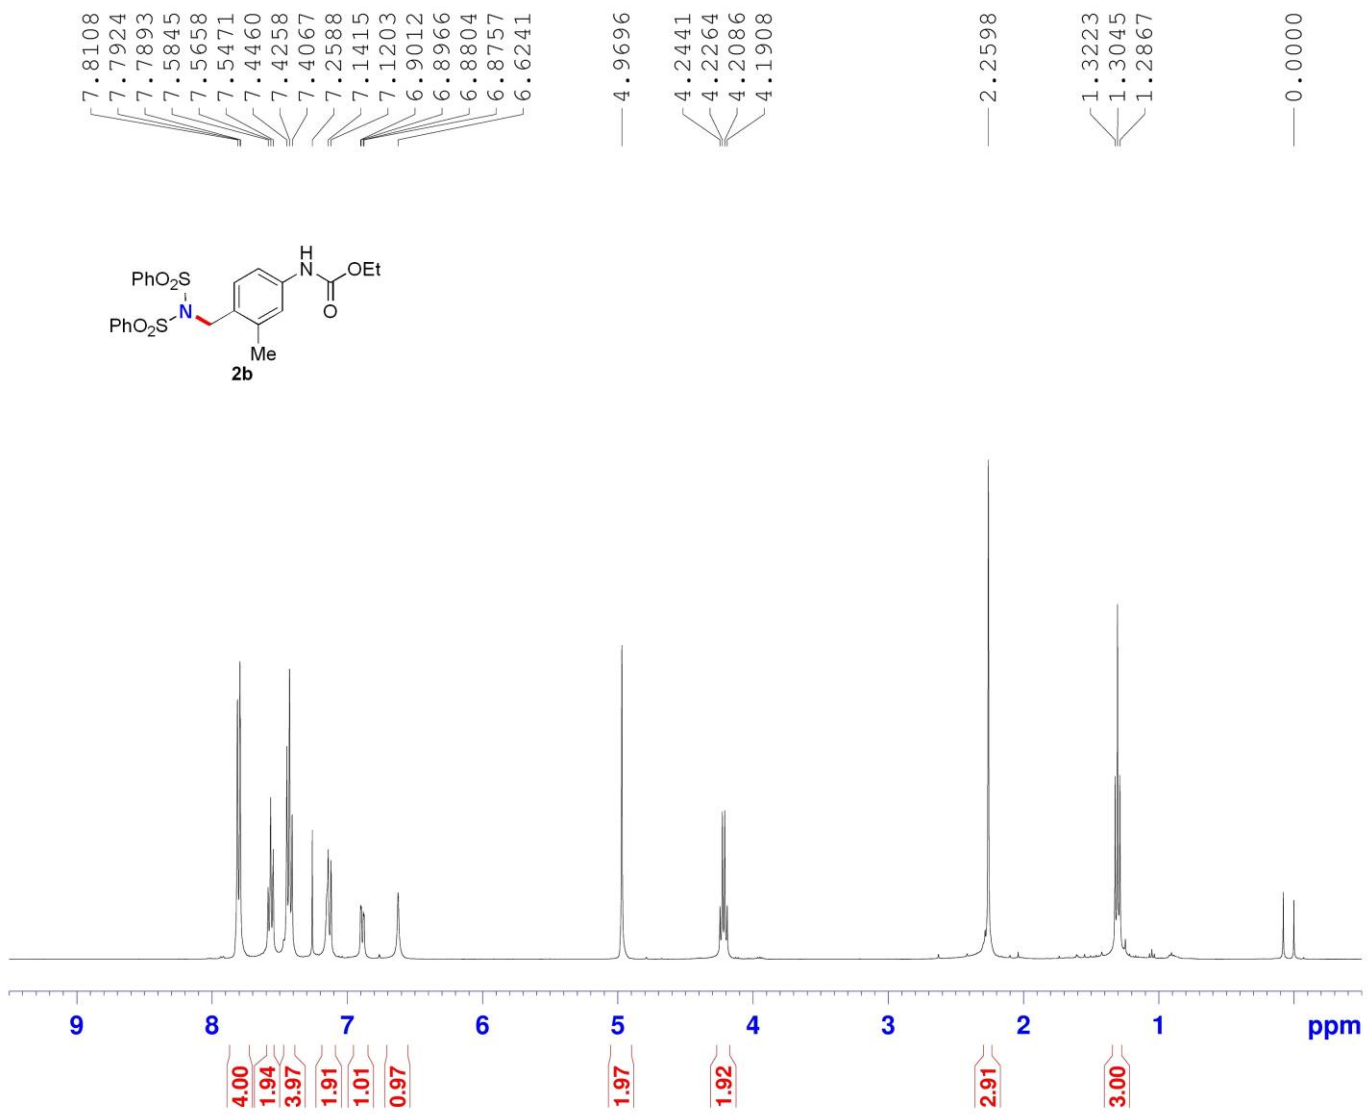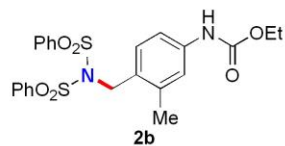

**BRUKER**

```

NAME          CLJ-WL-S2059
EXPNO         1
PROCNO       1
Date_        20190706
Time         16.44
INSTRUM      spect
PROBHD       5 mm PABBO BB/
PULPROG      zg30
TD           65536
SOLVENT      CDCl3
NS           8
DS           0
SWH          8012.820 Hz
FIDRES       0.122266 Hz
AQ           4.0894966 sec
RG           36.4
DW           62.400 usec
DE           6.50 usec
TE           300.6 K
D1           1.00000000 sec
TD0          1

===== CHANNEL f1 =====
SFO1         400.1324710 MHz
NUC1         1H
P1           8.04 usec
SI           65536
SF           400.1300099 MHz
WDW          EM
SSB          0
LB           0.30 Hz
GB           0
PC           1.00
  
```



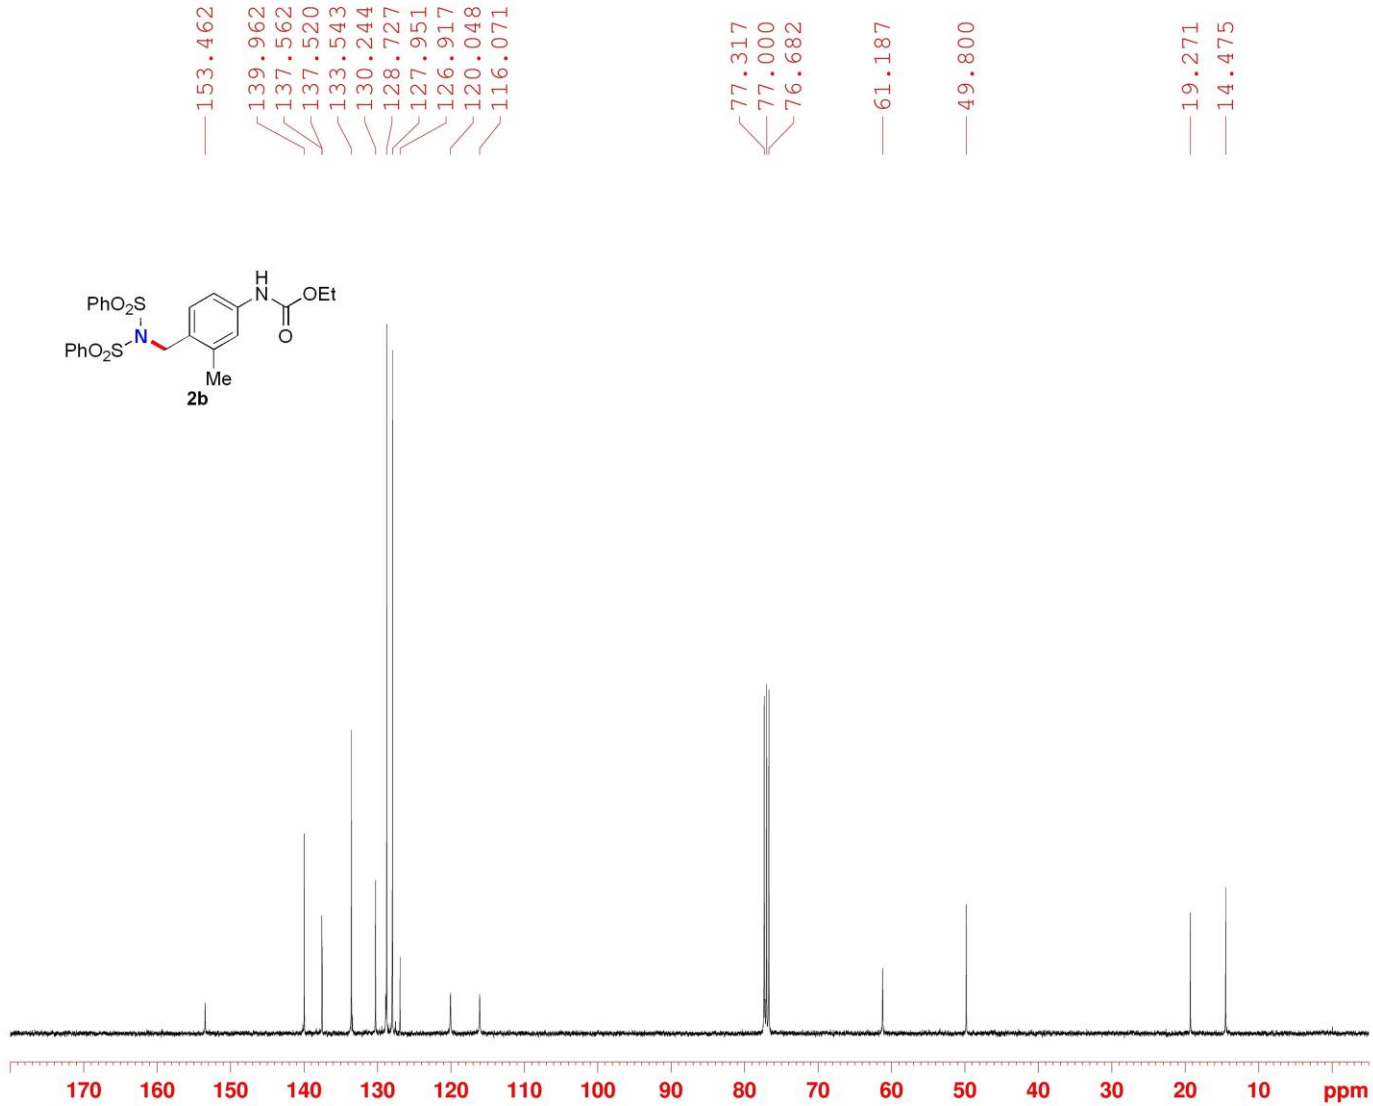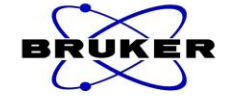

```

NAME      CLJ-WL-SZ059
EXPNO     2
PROCNO    1
Date_     20190706
Time      17.14
INSTRUM   spect
PROBHD    5 mm PABBO BB/
PULPROG   zgpg30
TD         65536
SOLVENT   CDCl3
NS         495
DS         0
SWH       24038.461 Hz
FIDRES    0.366798 Hz
AQ         1.3631988 sec
RG         194.26
DW         20.800 usec
DE         6.50 usec
TE         300.6 K
D1         2.00000000 sec
D11        0.03000000 sec
TD0        1

===== CHANNEL f1 =====
SFO1      100.6228293 MHz
NUC1       13C
P1         8.54 usec
SI         32768
SF         100.6127767 MHz
WDW        EM
SSB        0
LB         1.00 Hz
GB         0
PC         1.40

```

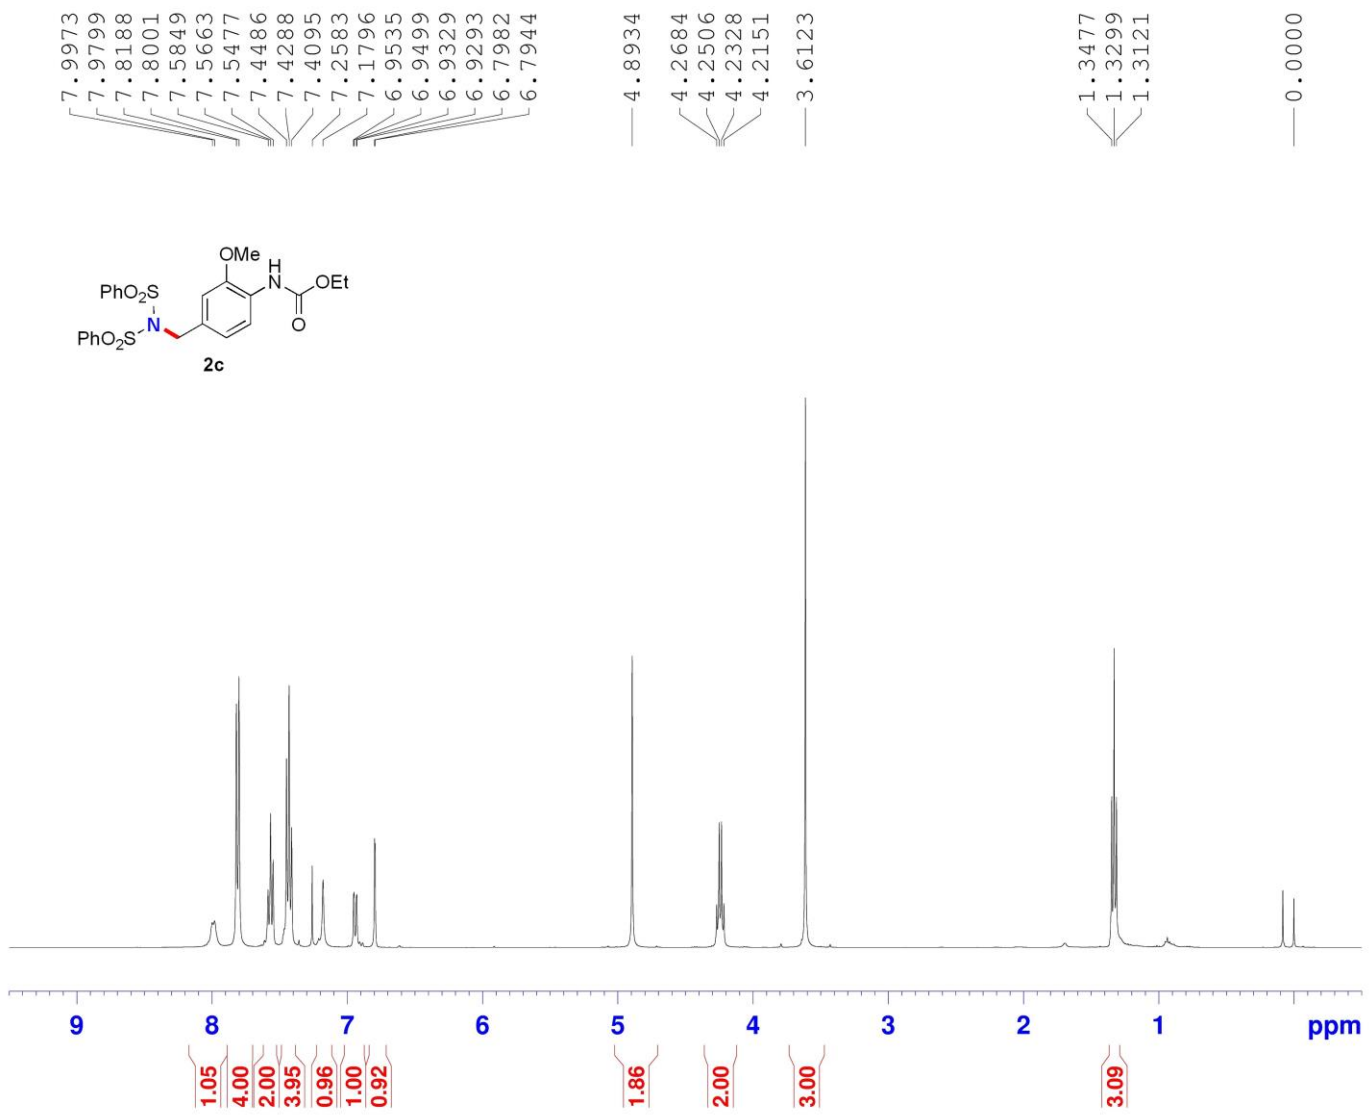

**BRUKER**

```

NAME      2019-07-15 shaozhong-064
EXPNO     1
PROCNO    1
Date_     20190715
Time      9.28 h
INSTRUM   spect
PROBHD    z116098_0673 (
PULPROG   zg30
TD         65536
SOLVENT   CDCl3
NS         16
DS         2
SWH        8012.820 Hz
FIDRES     0.244532 Hz
AQ          4.0894966 sec
RG          31.12
DW          62.400 usec
DE          6.50 usec
TE          294.8 K
D1          1.00000000 sec
TD0        1
SFO1       400.1324708 MHz
NUC1       1H
P1          10.00 usec
SI          65536
SF          400.1300101 MHz
WDW         EK
SSB         0
LB          0.30 Hz
GB          0
PC          1.00
  
```

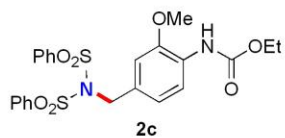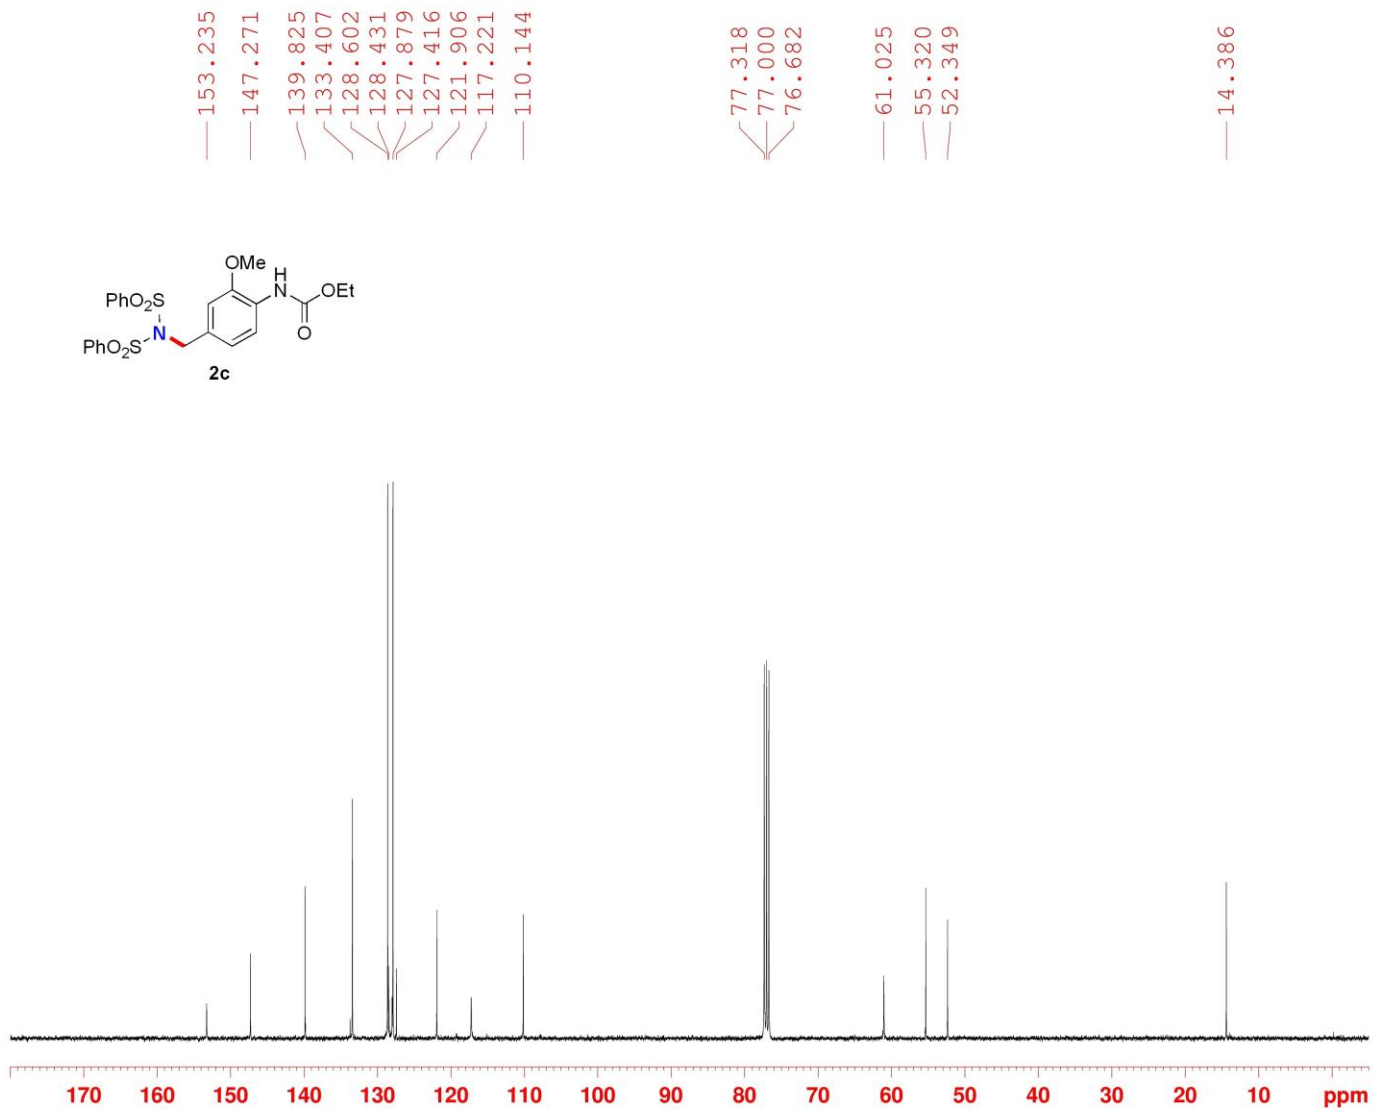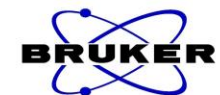

```

NAME      2019-07-15 shaozhong-064
EXPNO    2
PROCNO   1
Date_    20190715
Time     9.43 h
INSTRUM  spect
PROBHD   2116098_0673 (
PULPROG  zgpg30
TD       65536
SOLVENT  CDCl3
NS       256
DS       4
SWH      24038.461 Hz
FIDRES   0.733596 Hz
AQ       1.3631988 sec
RG       203.48
DW       20.800 usec
DE       6.50 usec
TE       295.0 K
D1       2.0000000 sec
D11      0.03000000 sec
TD0      1
SFO1     100.6228298 MHz
NUC1     13C
P1       10.00 usec
SI       32768
SF       100.6127907 MHz
WDW      EM
SSB      0
LB       1.00 Hz
GB       0
PC       1.40
  
```

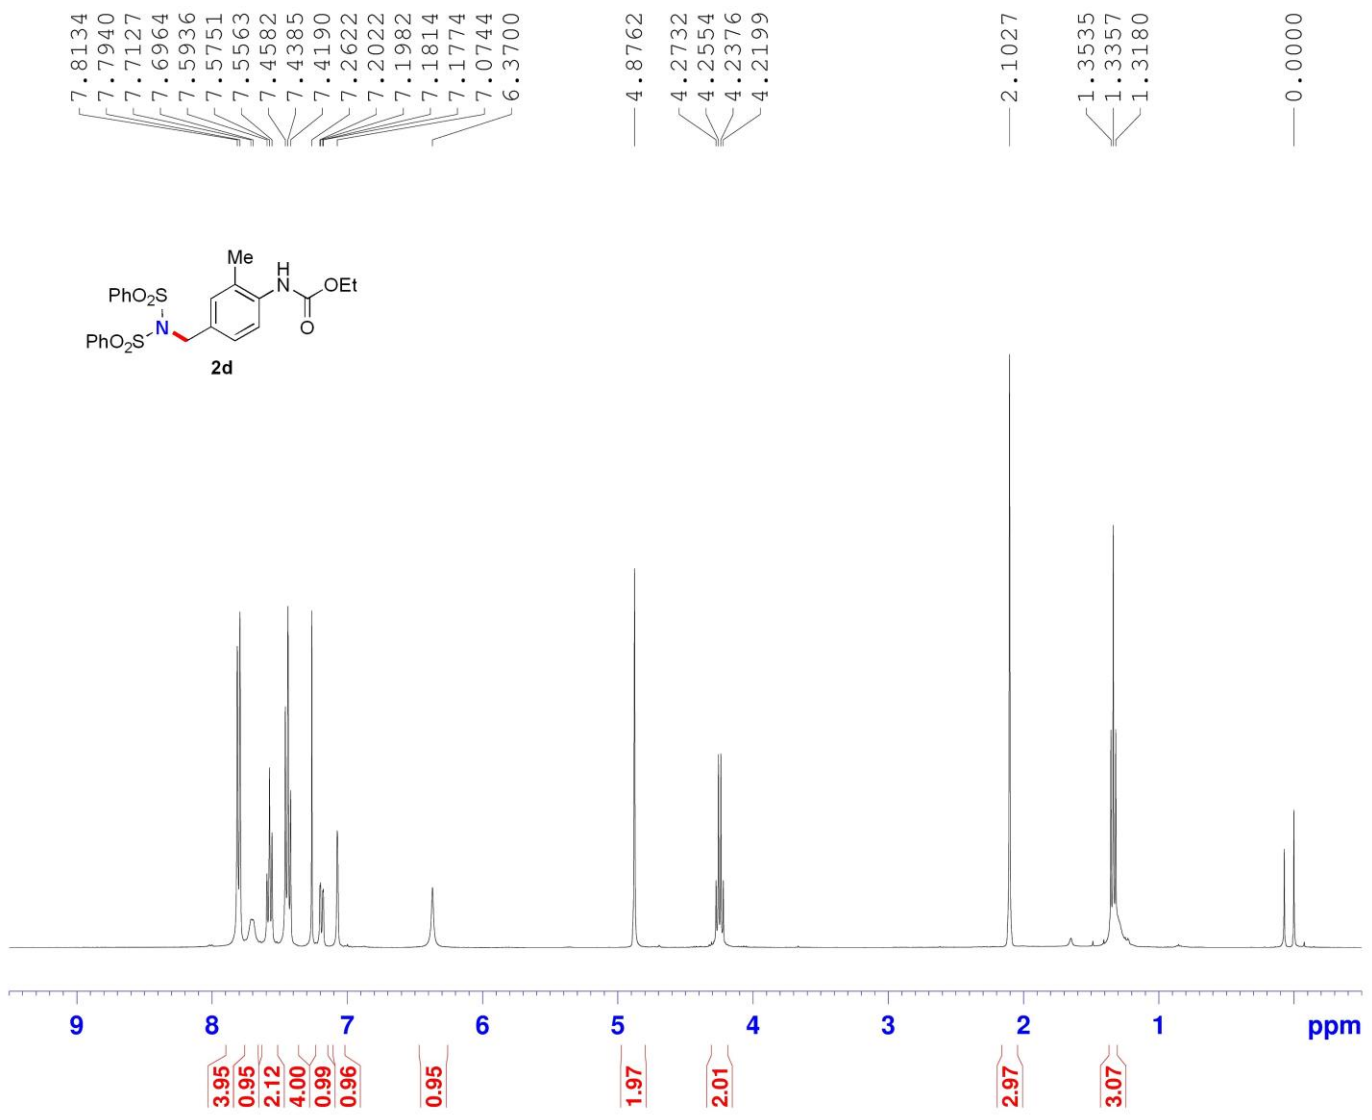

**BRUKER**

```

NAME      2019-07-15_luta0-S2063
EXPNO     1
PROCNO    1
Date_     20190715
Time      11.32 h
INSTRUM   spect
PROBHD    z116098_0673 (
PULPROG   zg30
TD         65536
SOLVENT   CDCl3
NS         16
DS         2
SWH        8012.820 Hz
FIDRES     0.244532 Hz
AQ         4.0894966 sec
RG         57.49
DW         62.400 usec
DE         6.50 usec
TE         294.7 K
D1         1.00000000 sec
TD0        1
SFO1      400.1324708 MHz
NUC1       1H
P1         10.00 usec
SI         65536
SF         400.1300088 MHz
WDW        EM
SSB        0
LB         0.30 Hz
GB         0
PC         1.00
  
```

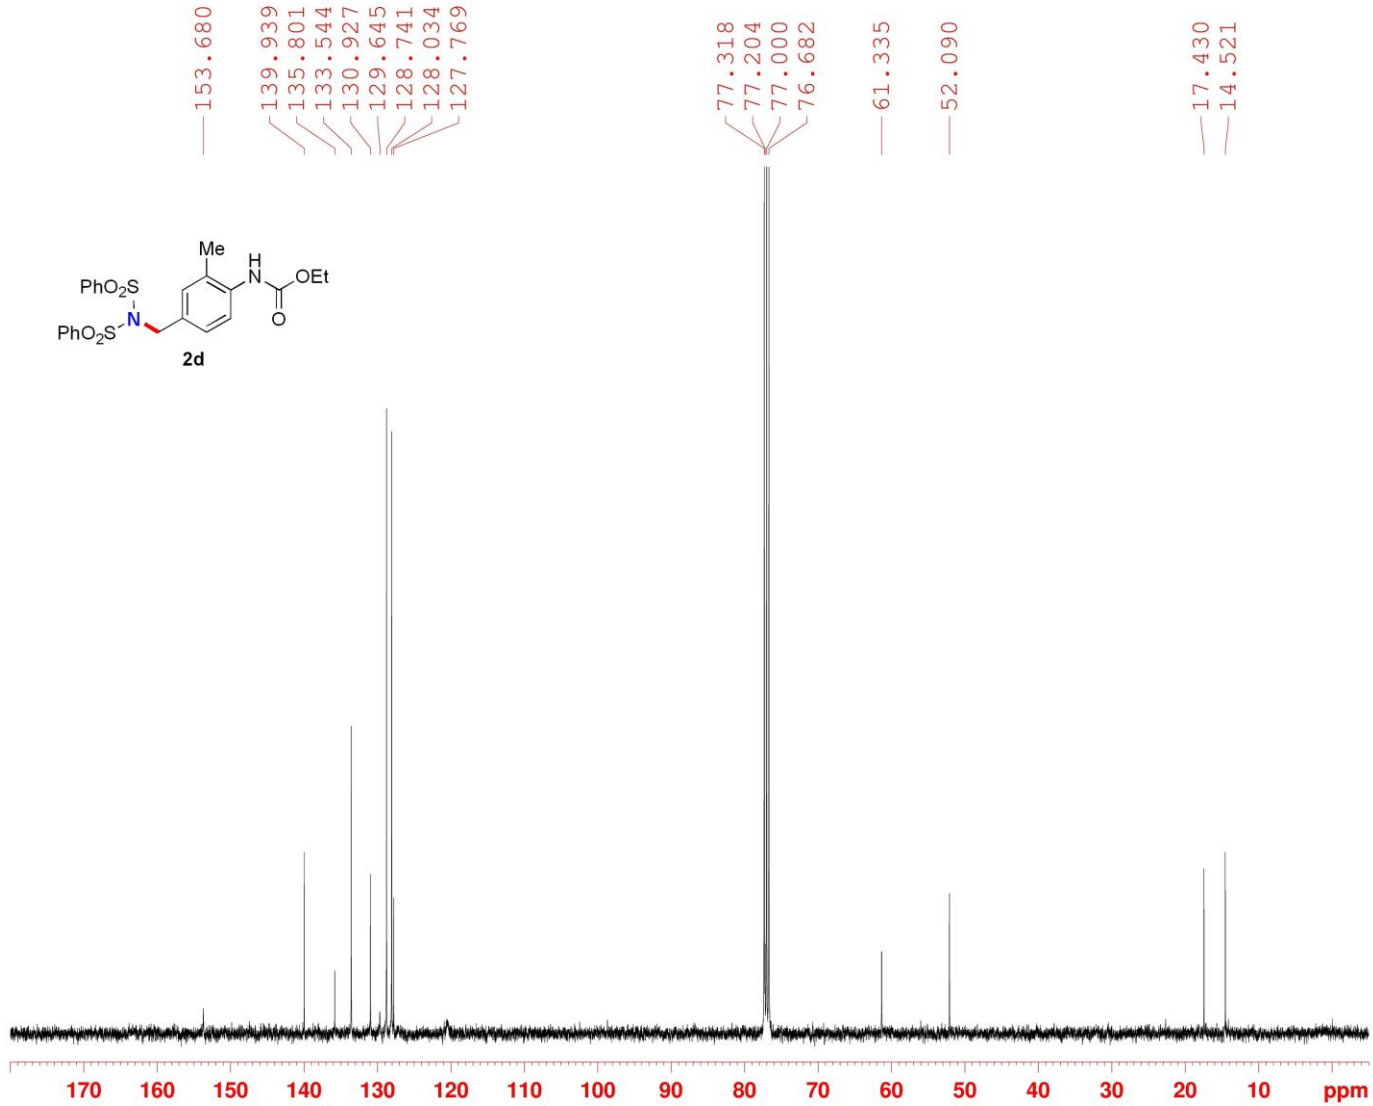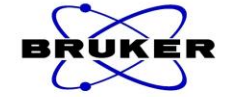

```

NAME      2019-07-15 lutao-SZ063
EXPNO     2
PROCNO    1
Date_     20190715
Time      11.48 h
INSTRUM   spect
PROBHD    Z116098_0673 (
PULPROG   zgpg30
TD         65536
SOLVENT   CDCl3
NS         256
DS         4
SWH        24038.461 Hz
FIDRES     0.733596 Hz
AQ         1.3631988 sec
RG         203.48
DW         20.800 usec
DE         6.50 usec
TE         295.3 K
D1         2.0000000 sec
D11        0.0300000 sec
TD0        1
SFO1      100.6228298 MHz
NUC1       13C
P1         10.00 usec
SI         32768
SF         100.6127759 MHz
WDW        EM
SSB        0
LB         1.00 Hz
GB         0
PC         1.40
  
```

7.8728  
7.8540  
7.6115  
7.5929  
7.5742  
7.4760  
7.4561  
7.4369  
7.3254  
7.2967  
7.2604  
7.1938  
7.1739  
7.1538  
6.7383  
6.7182

4.9970

4.2504  
4.2327  
4.2149  
4.1972

1.3229  
1.3052  
1.2874

0.0000

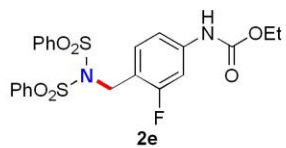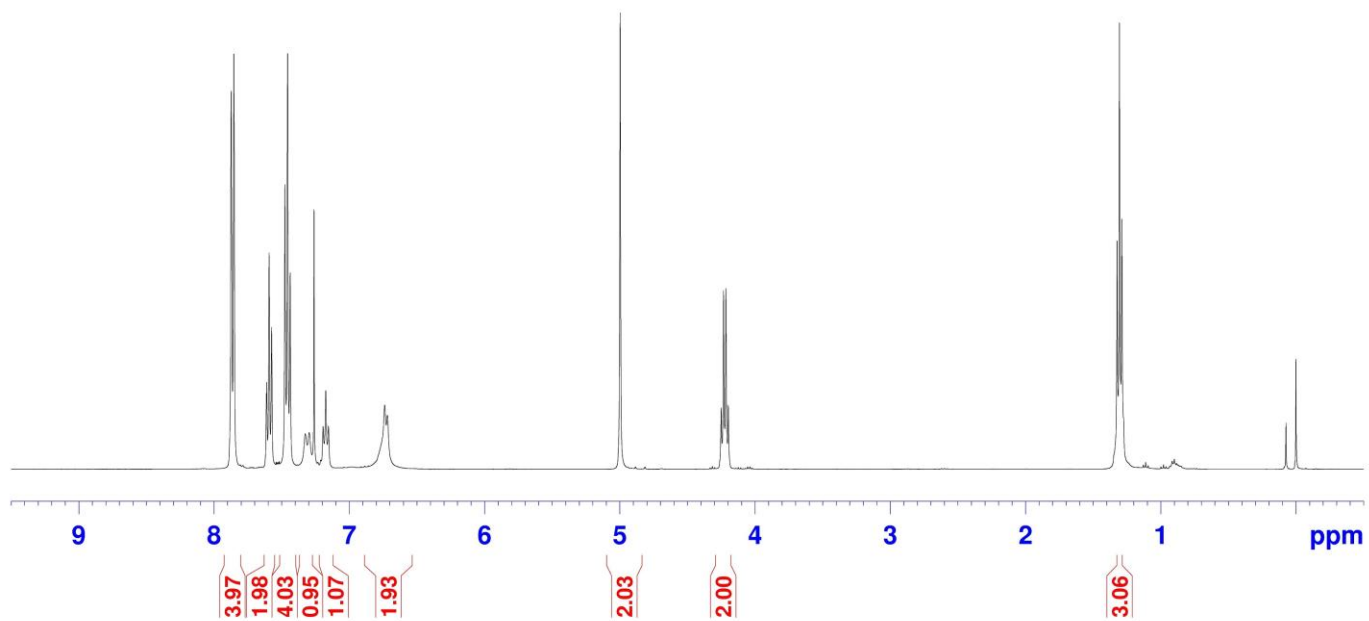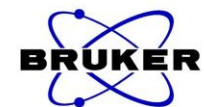

```

NAME      2019-08-22 shaozhong-S2079
EXPNO     1
PROCNO    1
Date_     20190822
Time      11.34 h
INSTRUM   spect
PROBHD    Z116098_0673 (
PULPROG   zg30
TD         65536
SOLVENT   CDCl3
NS         16
DS         2
SWH        8012.820 Hz
FIDRES     0.244532 Hz
AQ         4.0894966 sec
RG         31.12
DW         62.400 usec
DE         6.20 usec
TE         294.7 K
D1         1.00000000 sec
TD0        1
SFO1       400.1324708 MHz
NUC1       1H
P1         10.00 usec
SI         65536
SF         400.1300994 MHz
WDW        EM
SBB         0
LB         0.30 Hz
GB         0
PC         1.00
  
```

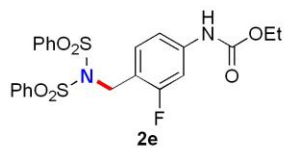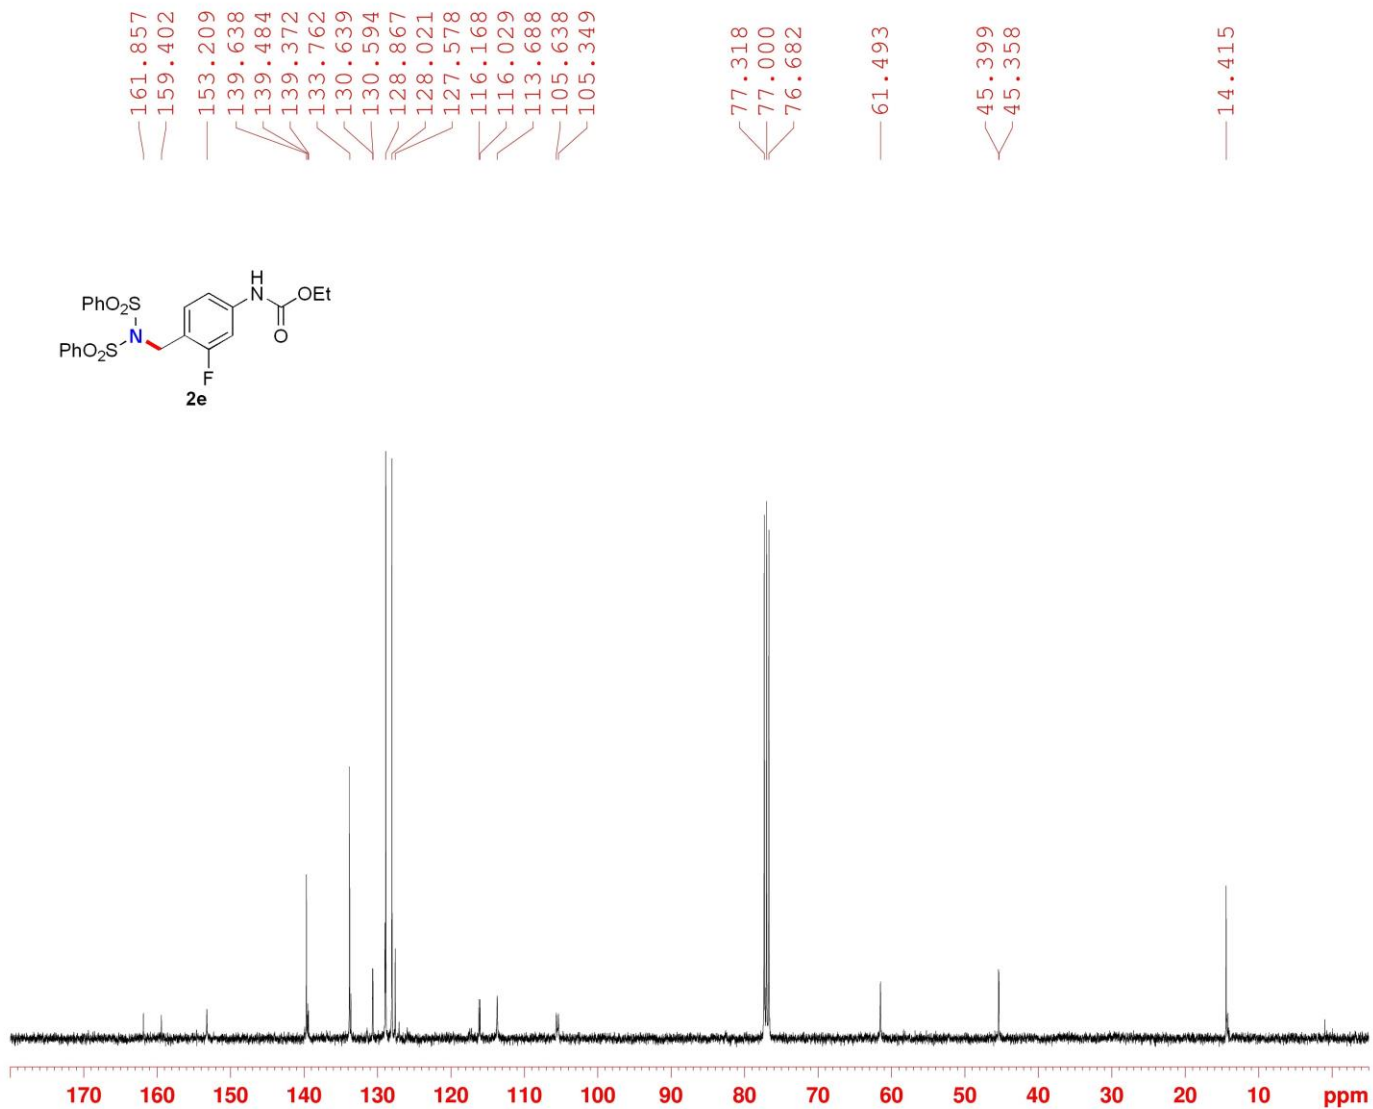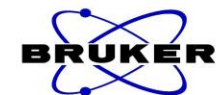

```

NAME      2019-07-15 shaozhong-068
EXPNO     2
PROCNO    1
Date_     20190715
Time      16.36 h
INSTRUM   spect
PROBHD    2116098_0673 (
PULPROG   zgpg30
TD         65536
SOLVENT   CDCl3
NS         256
DS         4
SWH        24038.461 Hz
FIDRES     0.733596 Hz
AQ         1.3631988 sec
RG         203.48
DW         20.800 usec
DE         6.50 usec
TE         295.1 K
D1         2.0000000 sec
D11        0.0300000 sec
TD0        1
SFO1      100.6228298 MHz
NUC1       13C
P1         10.00 usec
SI         32768
SF         100.6127766 MHz
WDW        EM
SSB        0
LB         1.00 Hz
GB         0
PC         1.40
  
```

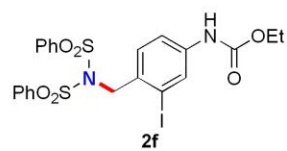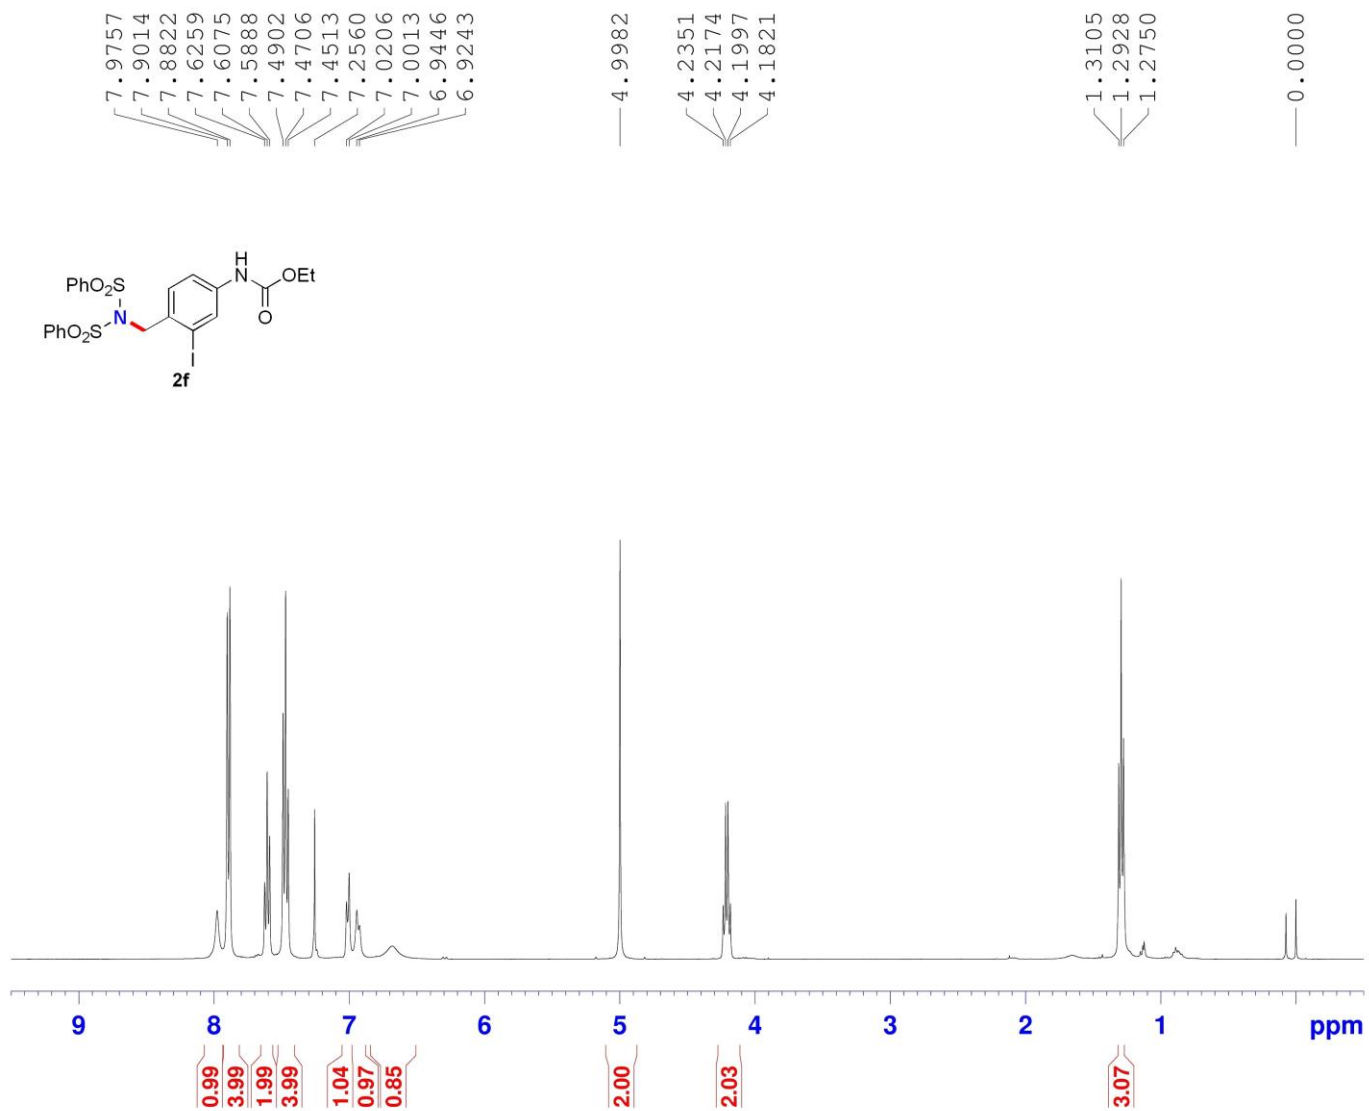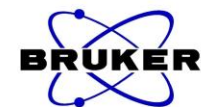

```

NAME      2019-08-17 shaozhong-S2077
EXPNO    1
PROCNO   1
Date_    20190817
Time     13.39 h
INSTRUM  spect
PROBHD   Z116098_0673 (
PULPROG  zg30
TD       65536
SOLVENT  CDCl3
NS       16
DS       2
SWH      8012.820 Hz
FIDRES   0.244532 Hz
AQ       4.0894966 sec
RG       31.12
DW       62.400 usec
DE       6.20 usec
TE       298.2 K
D1       1.00000000 sec
TDO      1
SFO1     400.1324708 MHz
NUC1     1H
P1       10.00 usec
SI       65536
SF       400.1300110 MHz
WDW      EM
SSB      0
LB       0.30 Hz
GB       0
PC       1.00
  
```



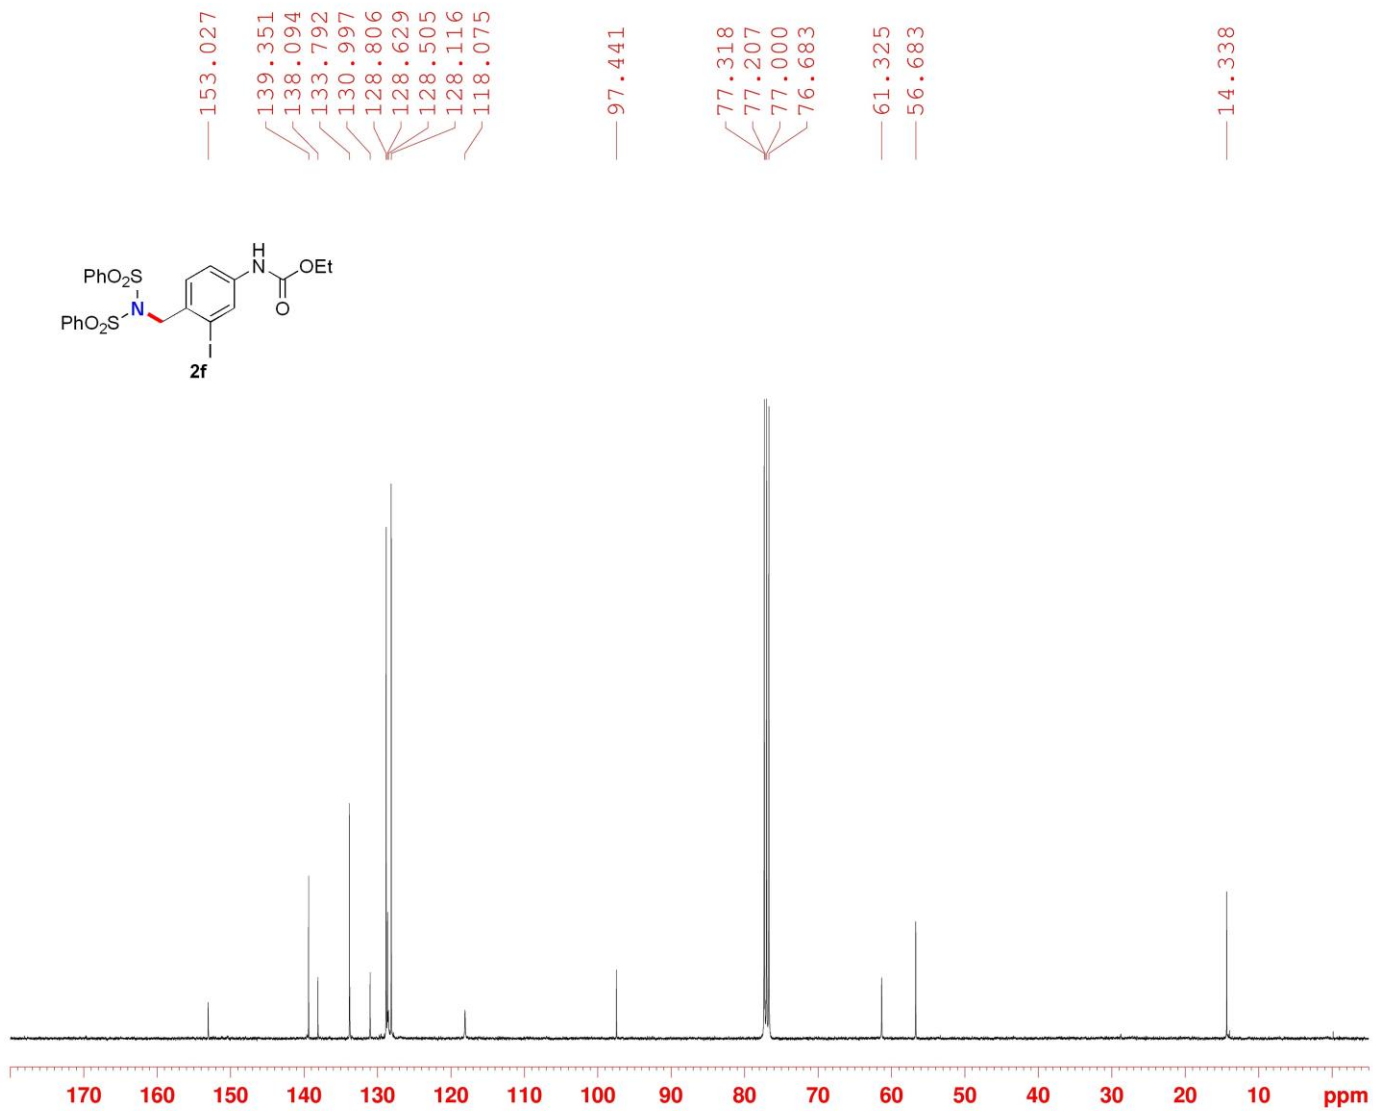

```

NAME      2019-08-17 shaozhong-S2077
EXPNO     2
PROCNO    1
Date_     20190817
Time      14.39 h
INSTRUM   spect
PROBHD    E116098_0673 (
PULPROG   zgpg30
TD         65536
SOLVENT   CDCl3
NS         1024
DS         4
SWH       24038.461 Hz
FIDRES    0.733596 Hz
AQ         1.3631988 sec
RG         203.48
DW         20.800 usec
DE         6.50 usec
TE         298.2 K
D1         2.00000000 sec
D11        0.03000000 sec
TDO        1
SF01       100.6228298 MHz
NUC1       13c
P1         10.00 usec
SI         32768
SF         100.6127892 MHz
WDW        EM
SSB        0
LB         1.00 Hz
GB         0
PC         1.40
  
```

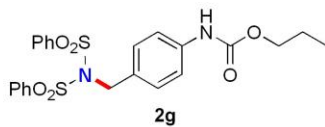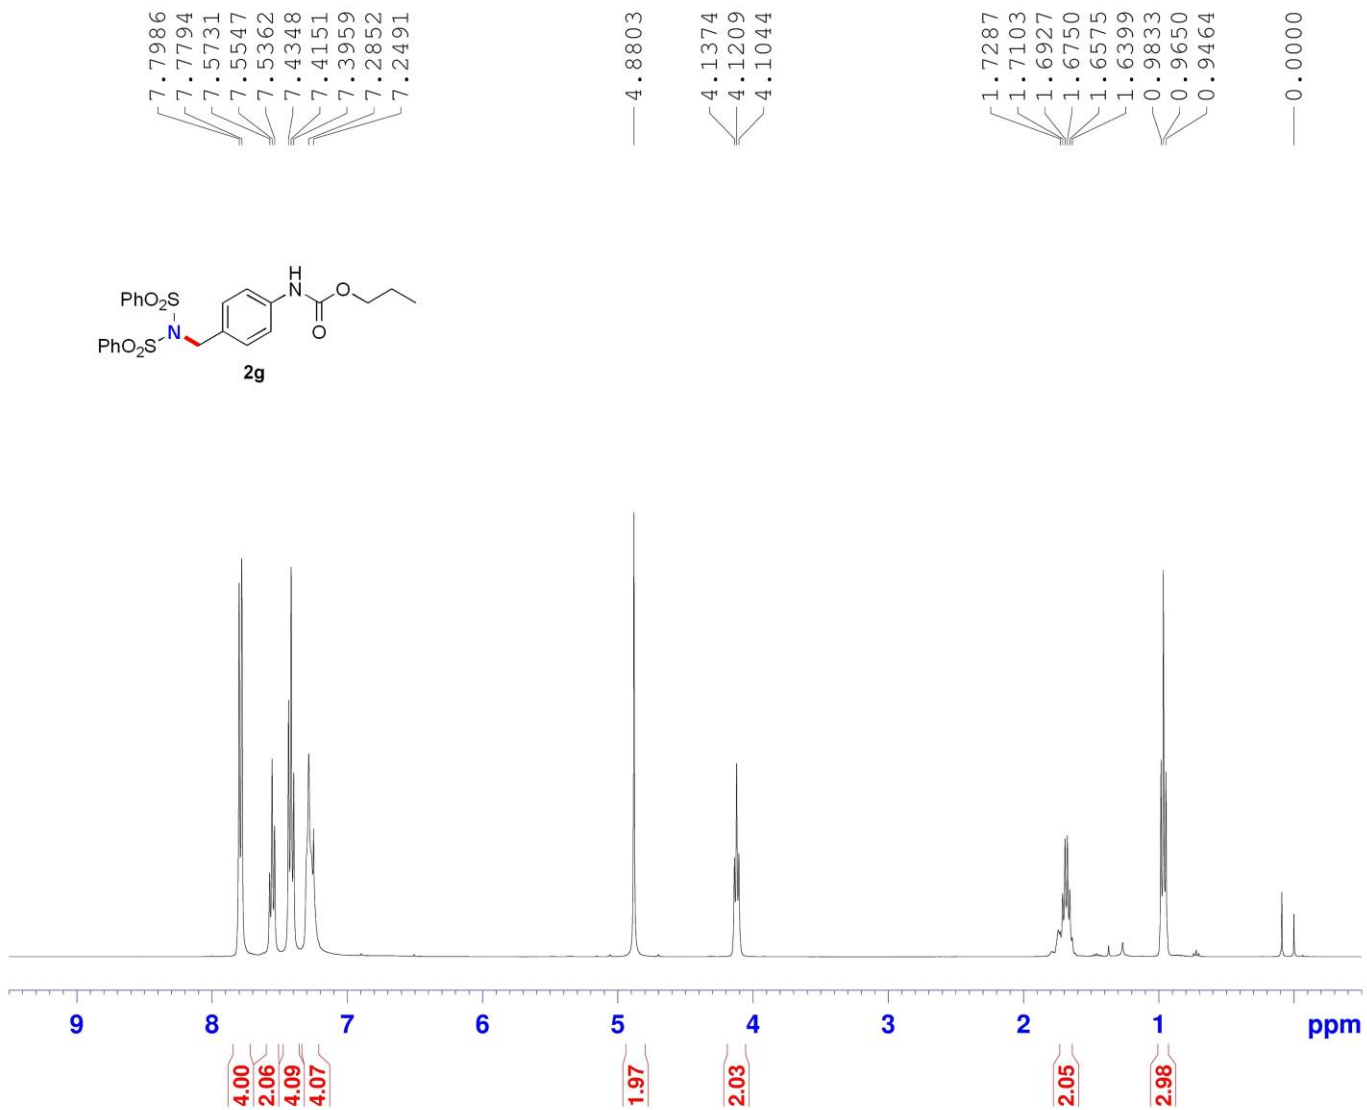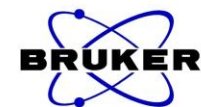

```

NAME      2019-07-04 lutao-S2051
EXPNO     1
PROCNO    1
Date_     20190704
Time      23.46 h
INSTRUM   spect
PROBHD    z116098_0673 (
PULPROG   zg30
TD         65536
SOLVENT   CDCl3
NS         16
DS         2
SWH        8012.820 Hz
FIDRES     0.244532 Hz
AQ         4.0894966 sec
RG         31.12
DW         62.400 usec
DE         6.50 usec
TE         294.5 K
D1         1.00000000 sec
TD0        1
SFO1      400.1324708 MHz
NUC1       1H
P1         10.00 usec
SI         65536
SF         400.1300135 MHz
WDW        EM
SSB        0
LB         0.30 Hz
GB         0
PC         1.00
  
```

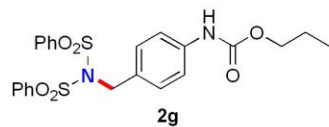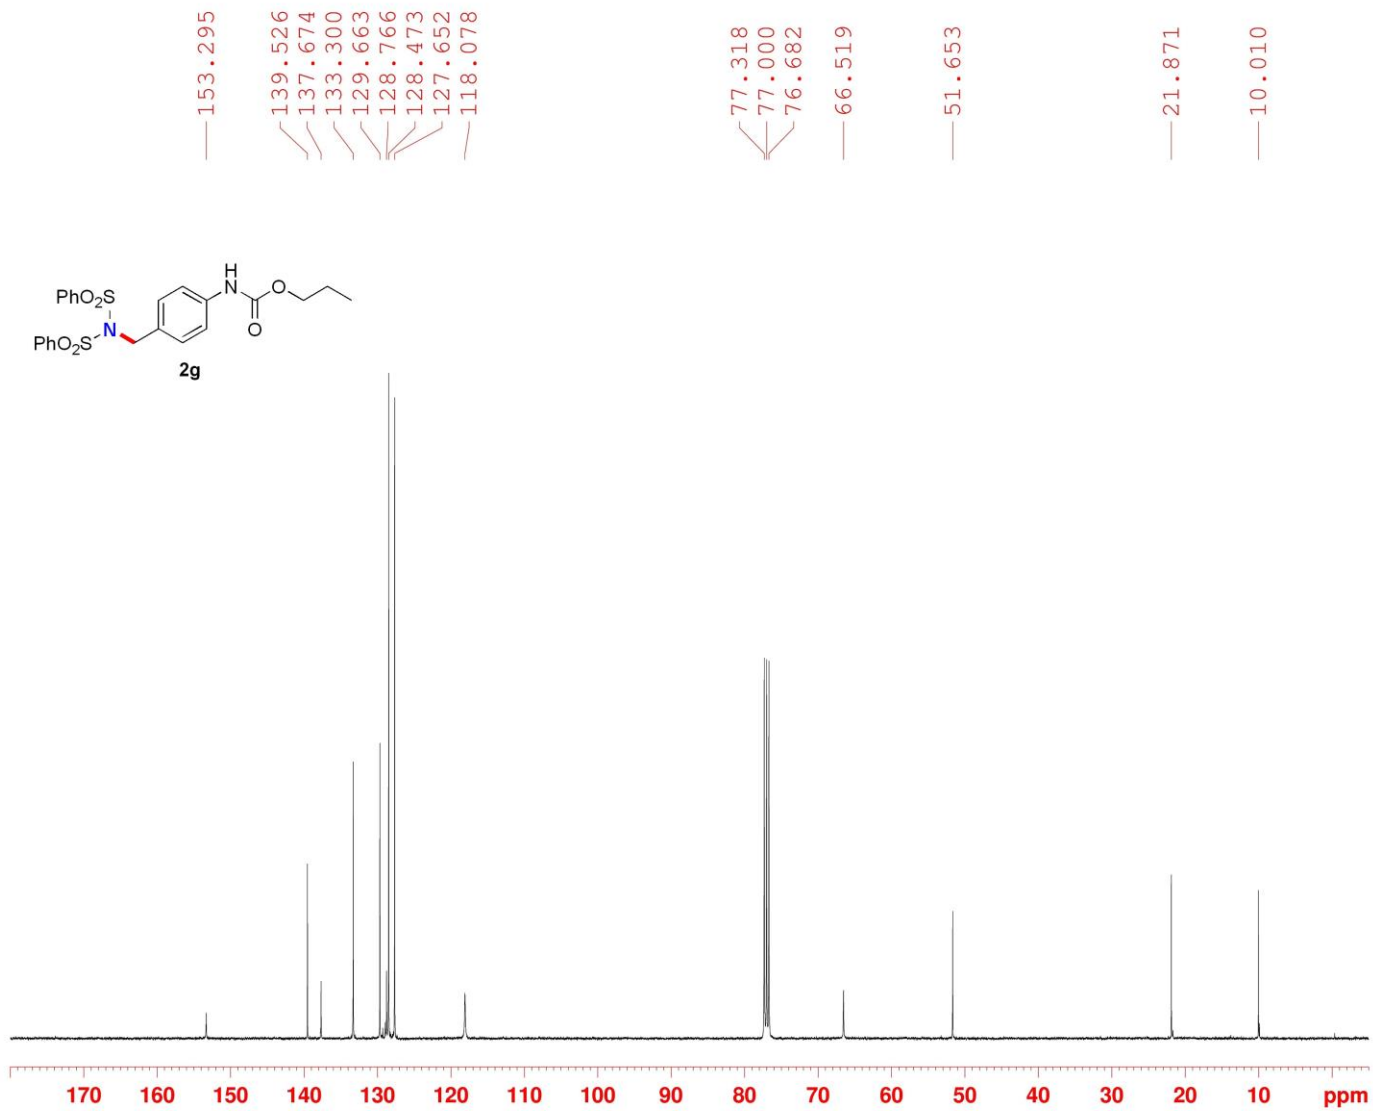

```

NAME      2019-07-04 lutao-SZ051
EXPNO     2
PROCNO    1
Date_     20190705
Time      0.16 h
INSTRUM   spect
PROBHD    Z116098_0673 (
PULPROG   zgpg30
TD         65536
SOLVENT   CDCl3
NS         512
DS         4
SWH        24038.461 Hz
FIDRES     0.733596 Hz
AQ         1.3631988 sec
RG         203.48
DW         20.800 usec
DE         6.50 usec
TE         294.8 K
D1         2.0000000 sec
D11        0.0300000 sec
TD0        1
SFO1       100.6228298 MHz
NUC1       13C
P1         10.00 usec
SI         32768
SF         100.6128120 MHz
WDW        EM
SSB        0
LB         1.00 Hz
GB         0
PC         1.40
  
```

7.8021  
7.7835  
7.7808  
7.5804  
7.5618  
7.5431  
7.4435  
7.4235  
7.4042  
7.3087  
7.2878  
7.2640  
7.2427  
6.7720

5.0551  
5.0395  
5.0239  
5.0083  
4.9928  
4.8790

1.3037  
1.2881

0.0000

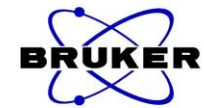

```

NAME      2019-07-04 lntao-S2052
EXPNO     1
PROCNO    1
Date_     20190705
Time      0.20 h
INSTRUM   spect
PROBHD    z116098_0673 (
PULPROG   zg30
TD         65536
SOLVENT   CDCl3
NS         16
DS         2
SWH        8012.820 Hz
FIDRES     0.244532 Hz
AQ         4.0894966 sec
RG         31.12
DW         62.400 usec
DE         6.50 usec
TE         294.6 K
D1         1.00000000 sec
TD0        1
SFO1       400.1324708 MHz
NUC1       1H
P1         10.00 usec
SI         65536
SF         400.1300079 MHz
WDW        EM
SSB        0
LB         0.30 Hz
GB         0
PC         1.00
  
```

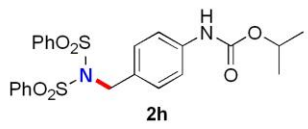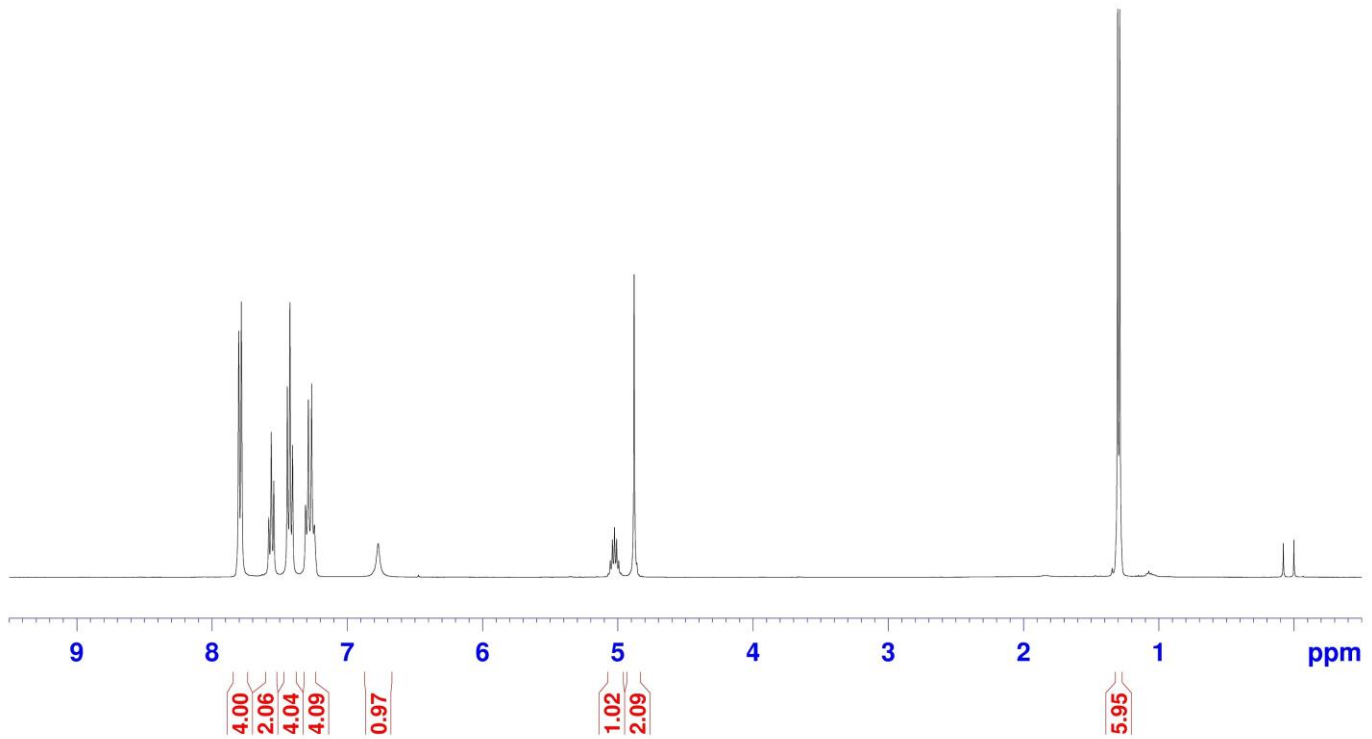

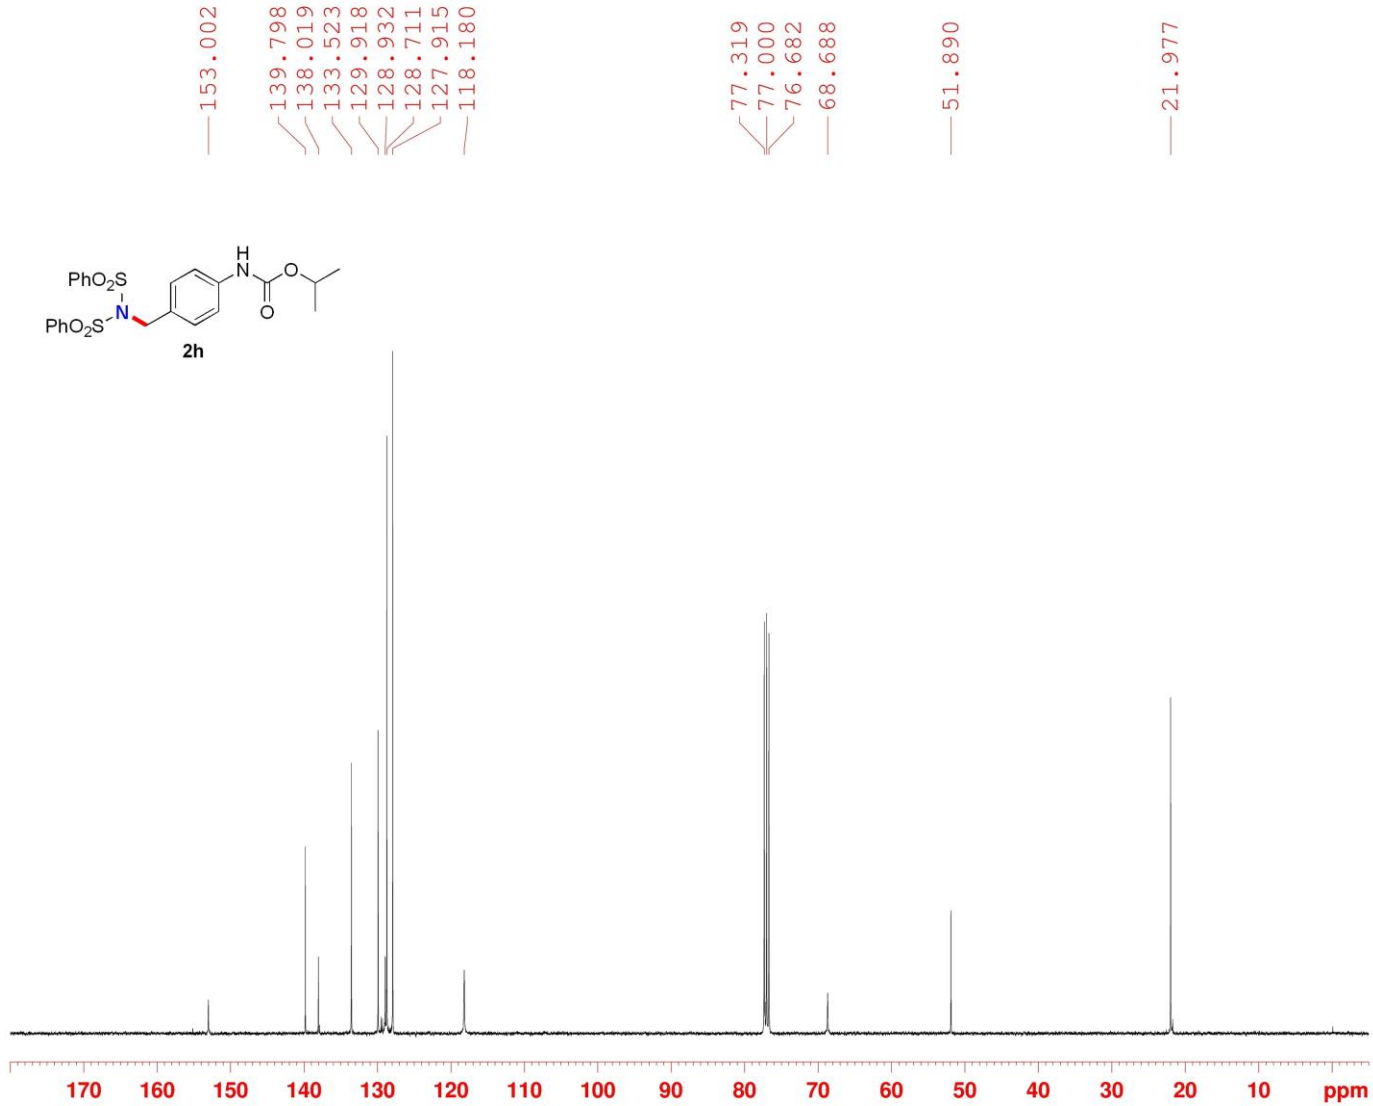

```

NAME      2019-07-04 lutao-S2052
EXPNO    2
PROCNO   1
Date_    20190705
Time     0.51 h
INSTRUM  spect
PROBHD   Z116098_0673 (
PULPROG  zgpg30
TD       65536
SOLVENT  CDCl3
NS       512
DS       4
SWH      24038.461 Hz
FIDRES   0.733596 Hz
AQ       1.3631988 sec
RG       203.48
DW       20.800 usec
DE       6.50 usec
TE       295.0 K
D1       2.0000000 sec
D11      0.0300000 sec
TD0      1
SFO1     100.6228298 MHz
NUC1     13C
P1       10.00 usec
SI       32768
SF       100.6127847 MHz
WDW      EM
SSB      0
LB       1.00 Hz
GB       0
PC       1.40
  
```

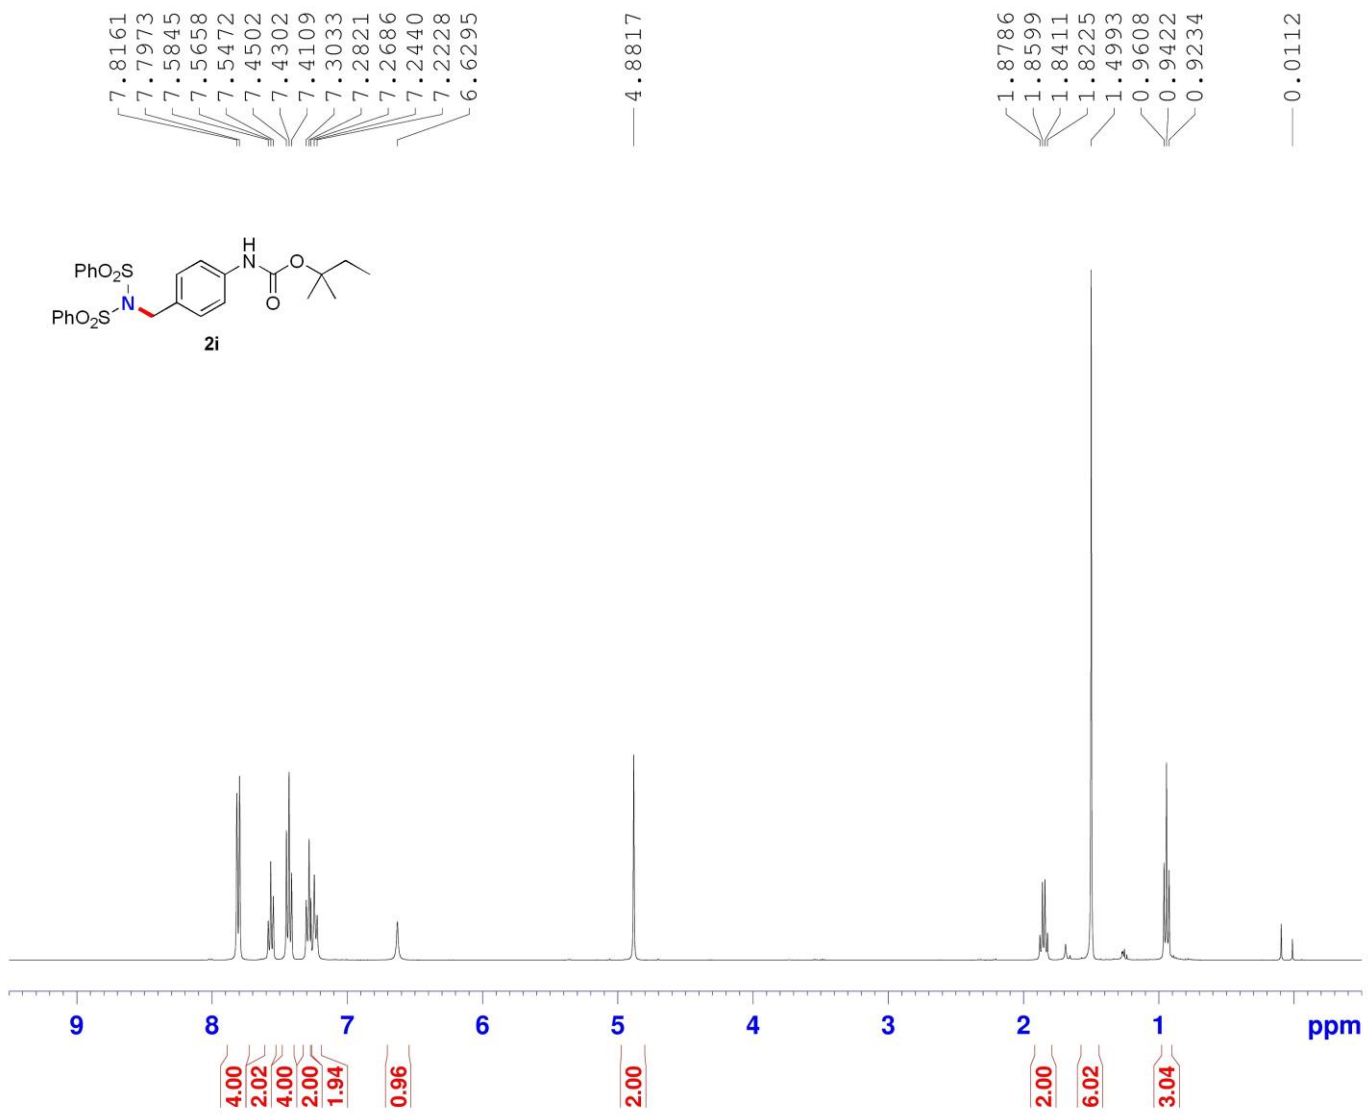

**BRUKER**

```

NAME          CLJ-WL-S2053
EXPNO         1
PROCNO        1
Date_         20190702
Time          4.45
INSTRUM       spect
PROBHD        5 mm PABBO BB/
PULPROG       zg30
TD            65536
SOLVENT       CDCl3
NS            8
DS            0
SWH           8012.820 Hz
FIDRES        0.122266 Hz
AQ            4.0894966 sec
RG            21.11
DW            62.400 usec
DE            6.50 usec
TE            300.6 K
D1            1.00000000 sec
TD0           1

===== CHANNEL f1 =====
SFO1          400.1324710 MHz
NUC1          1H
P1            8.04 usec
SI            65536
SF            400.1300061 MHz
WDW           EM
SSB           0
LB            0.30 Hz
GB            0
PC            1.00
  
```

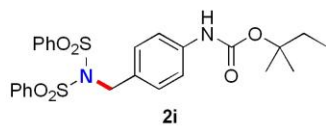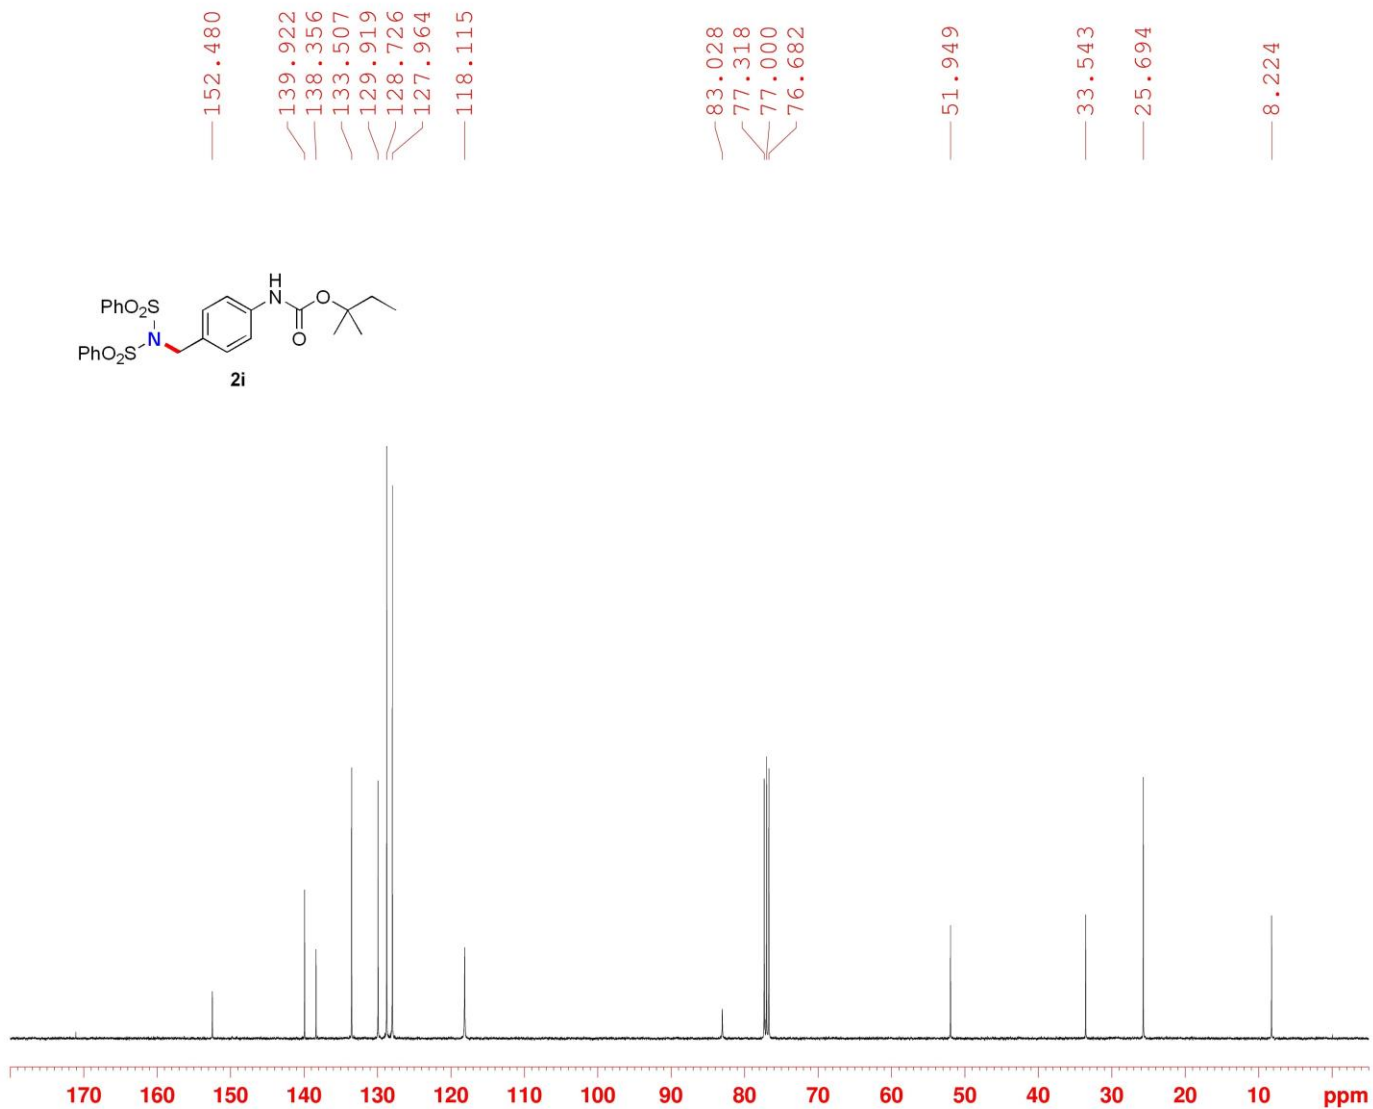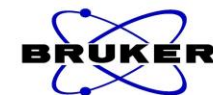

```

NAME      CLJ-WL-SZ053
EXPNO     2
PROCNO    1
Date_     20190702
Time      5.15
INSTRUM   spect
PROBHD    5 mm PABBO BB/
PULPROG   zgpg30
TD         65536
SOLVENT   CDCl3
NS         512
DS         0
SWH        24038.461 Hz
FIDRES     0.366798 Hz
AQ         1.3631988 sec
RG         194.26
DW         20.800 usec
DE         6.50 usec
TE         300.6 K
D1         2.00000000 sec
D11        0.03000000 sec
TD0        1

```

```

===== CHANNEL f1 =====
SFO1      100.6228293 MHz
NUC1       13C
P1         8.54 usec
SI         32768
SF         100.6127804 MHz
WDW        EM
SSB        0
LB         1.00 Hz
GB         0
PC         1.40

```

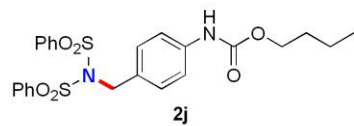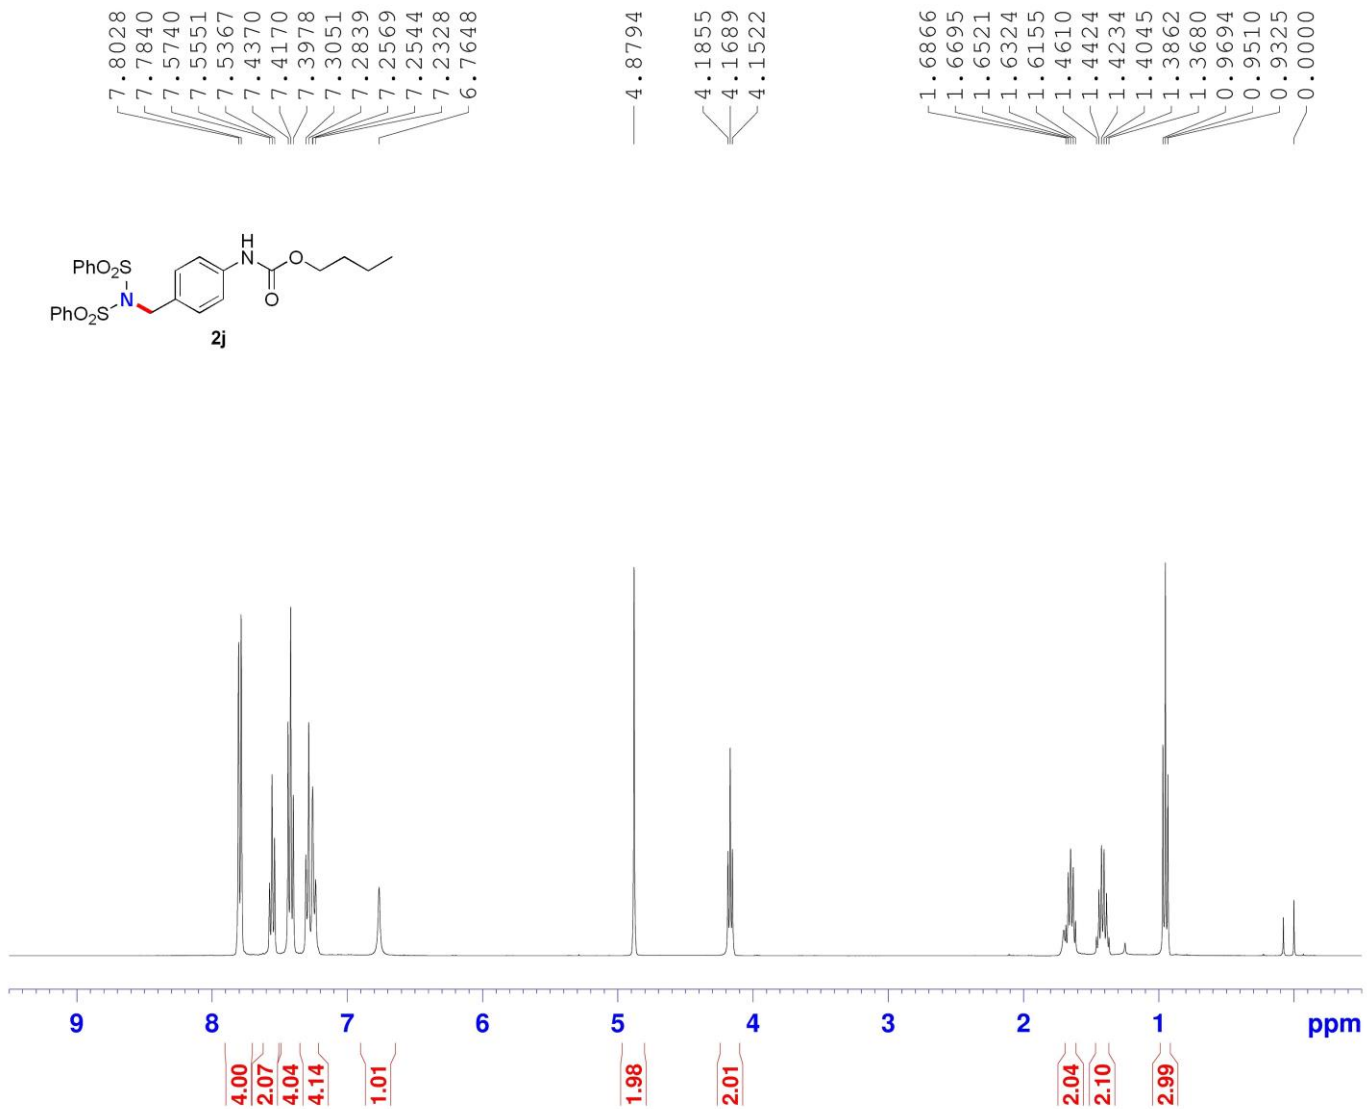

```

NAME      CLJ-WL-SZ028
EXPNO     1
PROCNO    1
Date_     20190614
Time      4.38
INSTRUM   spect
PROBHD    5 mm PABBO BB/
PULPROG   zg30
TD         65536
SOLVENT   CDCl3
NS         8
DS         0
SWH        8012.820 Hz
FIDRES     0.122266 Hz
AQ         4.0894966 s
RG         32.77
DW         62.400 us
DE         6.50 us
TE         300.6 K
D1         1.00000000 s
TDO        1
  
```

```

===== CHANNEL f1 =====
SFO1      400.1324710 MHz
NUC1      1H
P1        8.04 us
SI        65536
SF        400.1300102 MHz
WDW       EM
SSB       0
LB        0.30 Hz
GB        0
PC        1.00
  
```



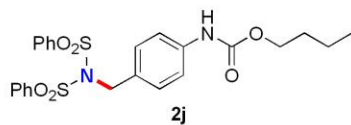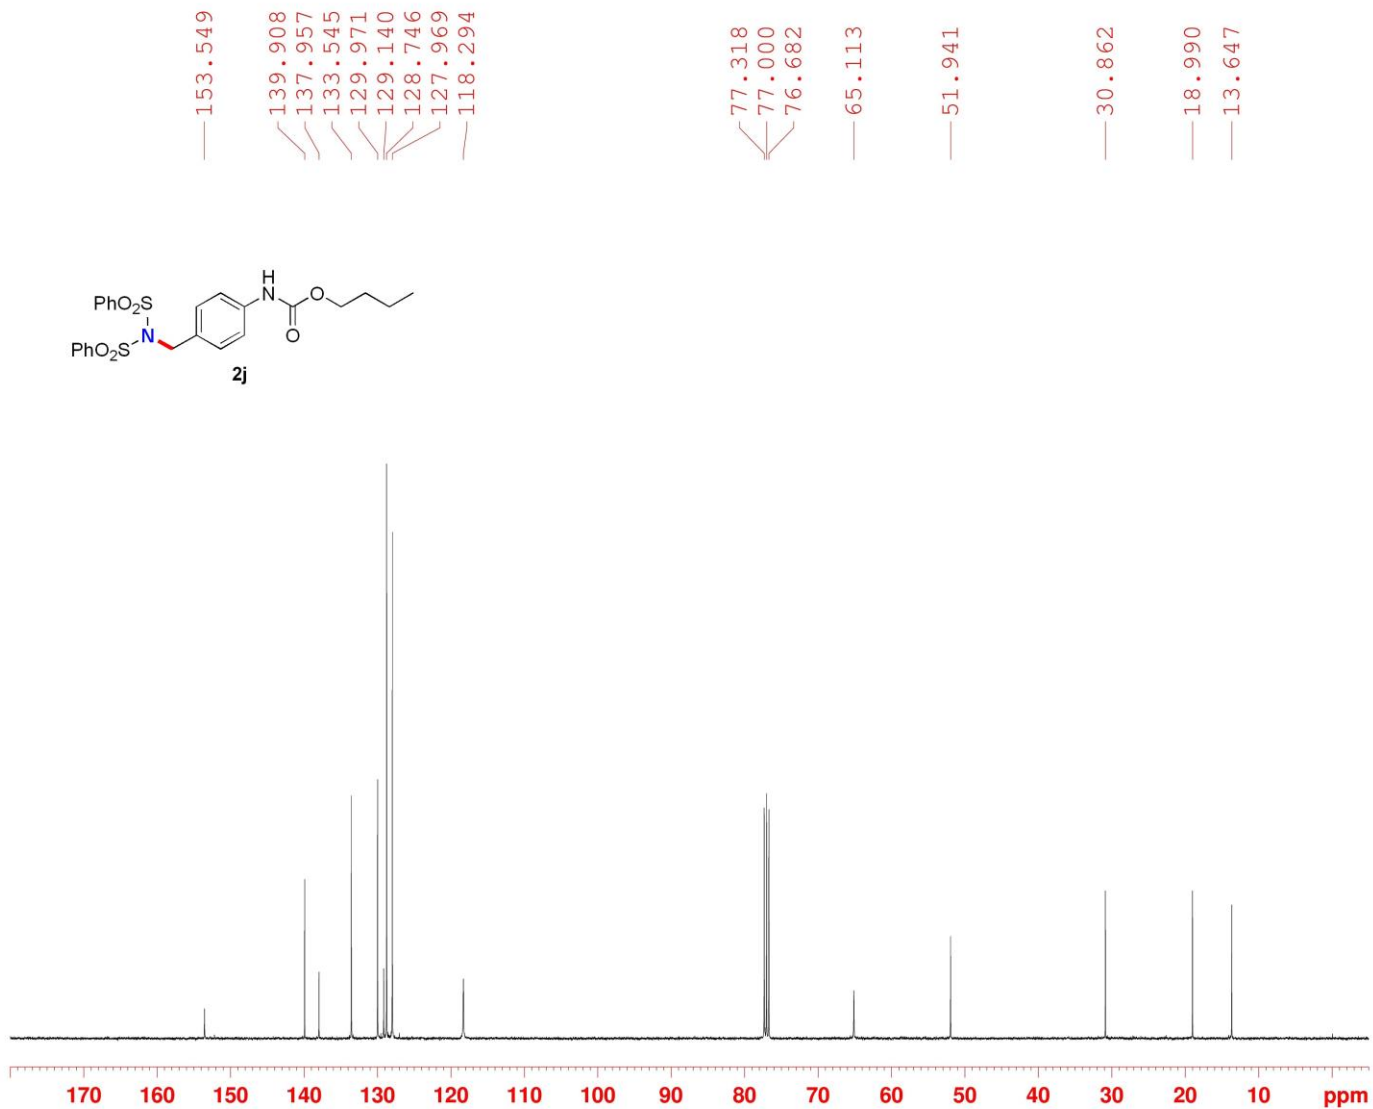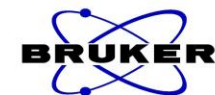

```

NAME      CLJ-WL-SZ028
EXPNO     2
PROCNO    1
Date_     20190614
Time      5.09
INSTRUM   spect
PROBHD    5 mm PABBO BB/
PULPROG   zgpg30
TD         65536
SOLVENT   CDCl3
NS         512
DS         0
SWH        24038.461 Hz
FIDRES     0.366798 Hz
AQ         1.3631988 sec
RG         194.26
DW         20.800 usec
DE         6.50 usec
TE         300.6 K
D1         2.00000000 sec
D11        0.03000000 sec
TD0        1

```

```

===== CHANNEL f1 =====
SFO1      100.6228293 MHz
NUC1      13C
P1         8.54 usec
SI         32768
SF         100.6127790 MHz
WDW        EM
SSB         0
LB         1.00 Hz
GB         0
PC         1.40

```

7.8106  
7.7919  
7.7892  
7.5811  
7.5625  
7.5438  
7.4449  
7.4248  
7.4054  
7.3988  
7.3784  
7.3358  
7.3139  
7.2876  
7.2644  
7.2517  
7.2461  
7.1980  
7.1790

4.8881

0.0001

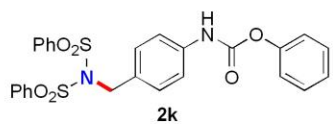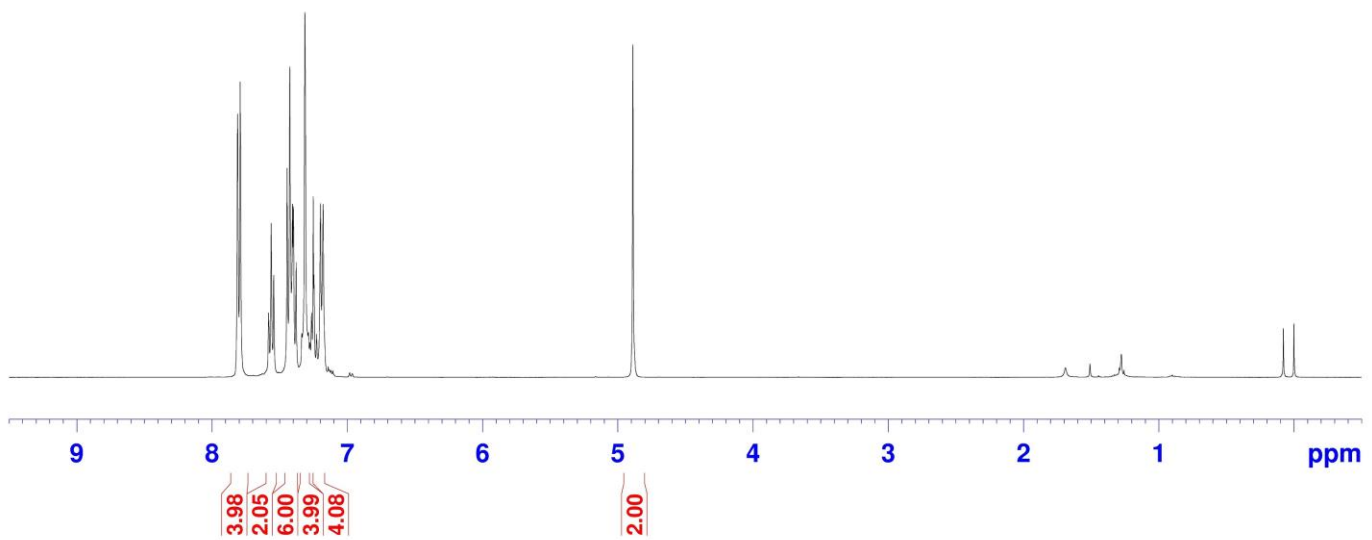

**BRUKER**

```

NAME      2019-07-08 shaozhong-050
EXPNO    1
PROCNO   1
Date_    20190708
Time     16.10 h
INSTRUM  spect
PROBHD   z116098_0673 (
PULPROG  zg30
TD       65536
SOLVENT  CDCl3
NS       16
DS       2
SWH      8012.820 Hz
FIDRES   0.244532 Hz
AQ       4.0894966 sec
RG       31.12
DW       62.400 usec
DE       6.50 usec
TE       294.5 K
D1       1.00000000 sec
TDO      1
SFO1     400.1324708 MHz
NUC1     1H
P1       10.00 usec
SI       65536
SF       400.1300130 MHz
WDW      EK
SSB      0
LB       0.30 Hz
GB       0
PC       1.00
  
```

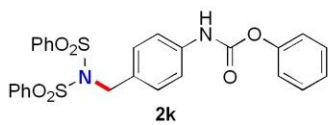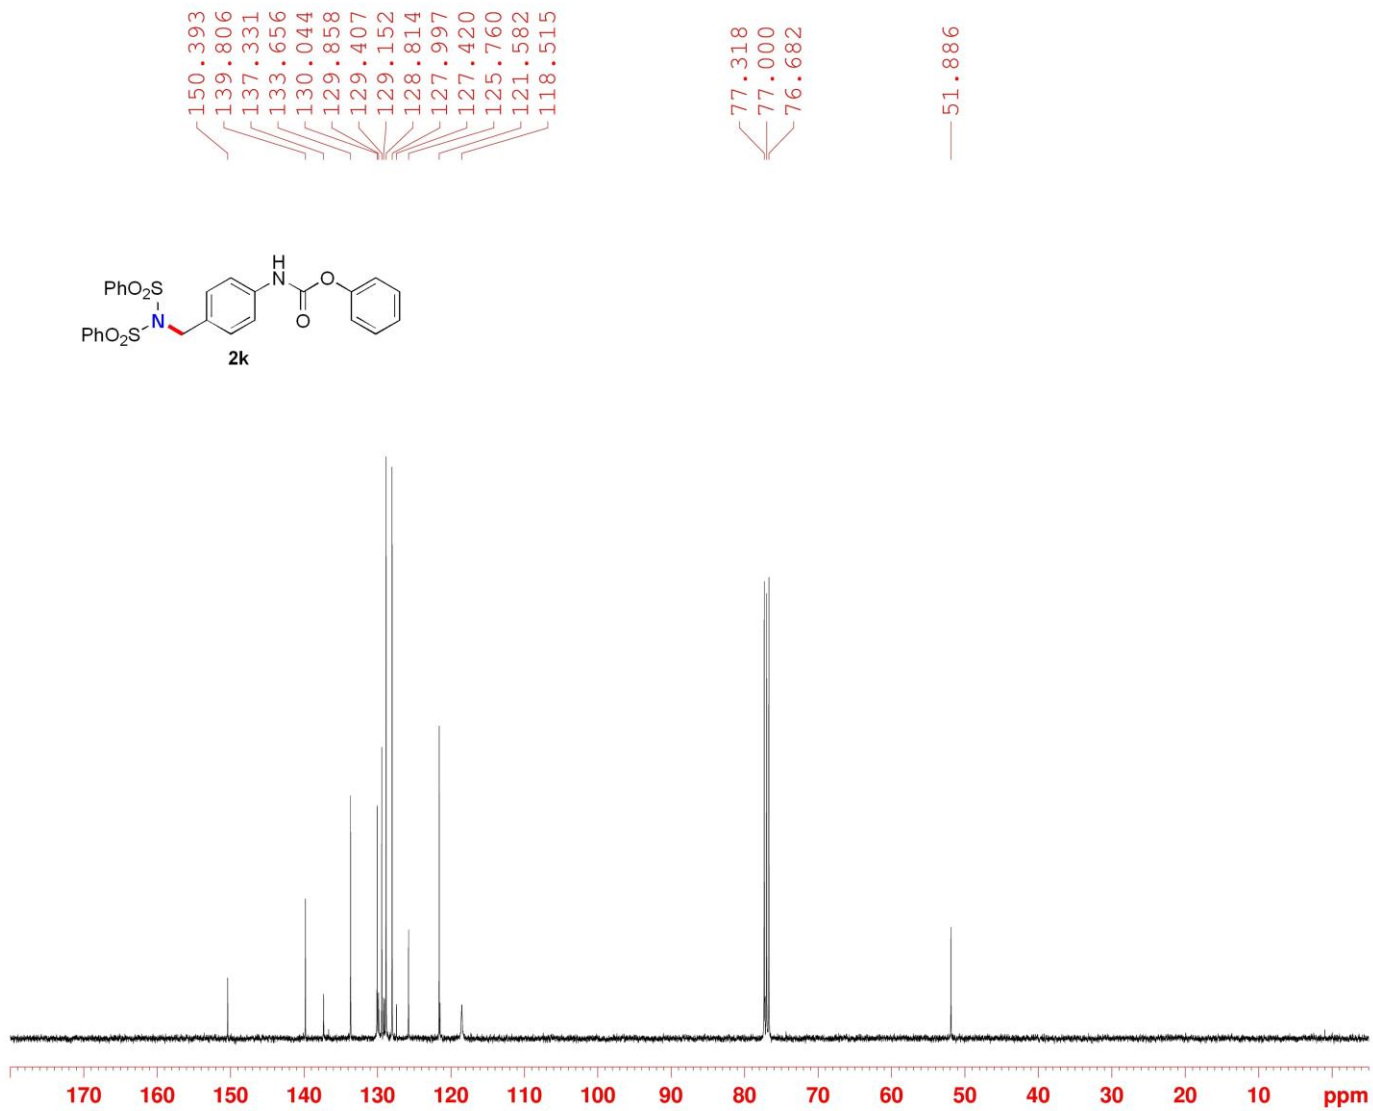

```

NAME      2019-07-08 shaozhong-050
EXPNO     2
PROCNO    1
Date_     20190708
Time      16.26 h
INSTRUM   spect
PROBHD    2116098_0673 (
PULPROG   zgpg30
TD         65536
SOLVENT   CDCl3
NS         256
DS         4
SWH        24038.461 Hz
FIDRES     0.733596 Hz
AQ         1.3631988 sec
RG         203.48
DW         20.800 usec
DE         6.50 usec
TE         295.3 K
D1         2.0000000 sec
D11        0.0300000 sec
TD0        1
SFO1      100.6228298 MHz
NUC1       13C
P1         10.00 usec
SI         32768
SF         100.6127784 MHz
WDW        EM
SSB        0
LB         1.00 Hz
GB         0
PC         1.40
  
```

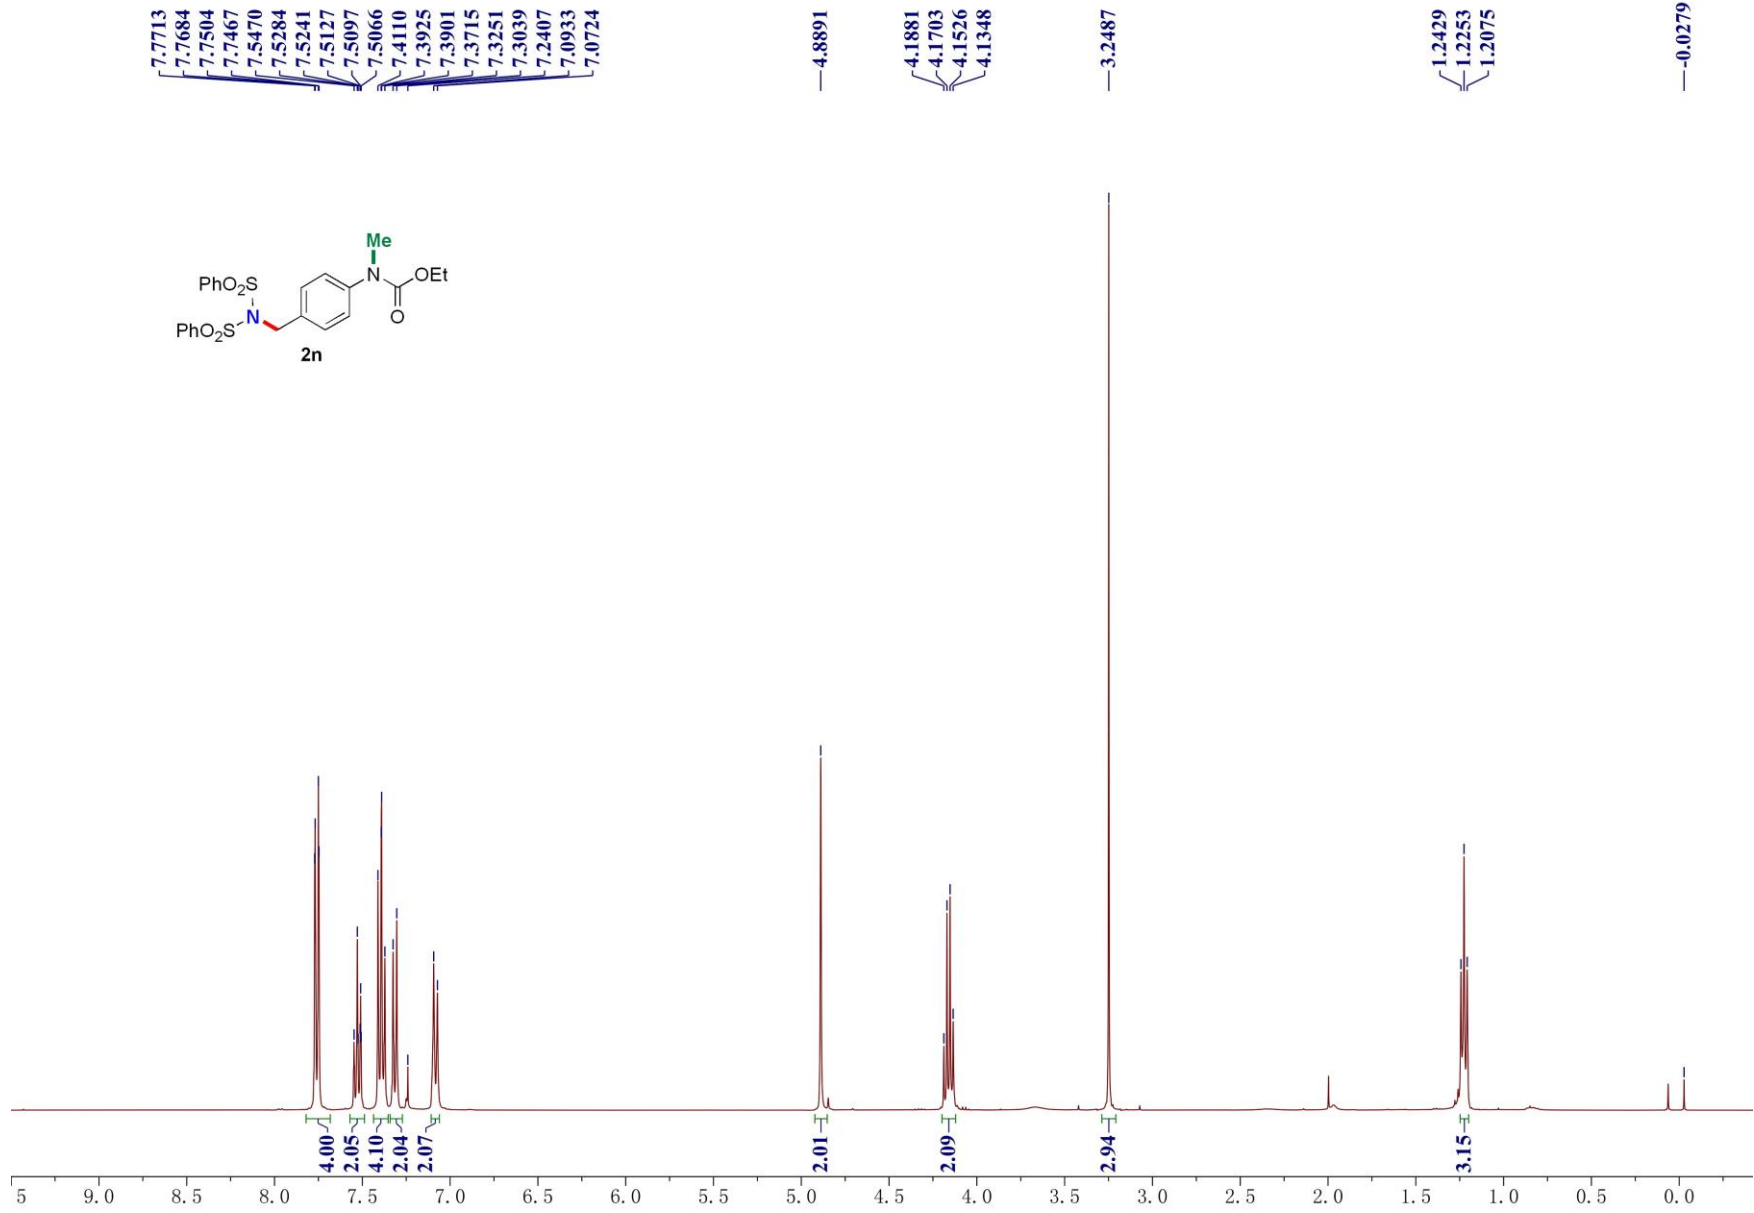

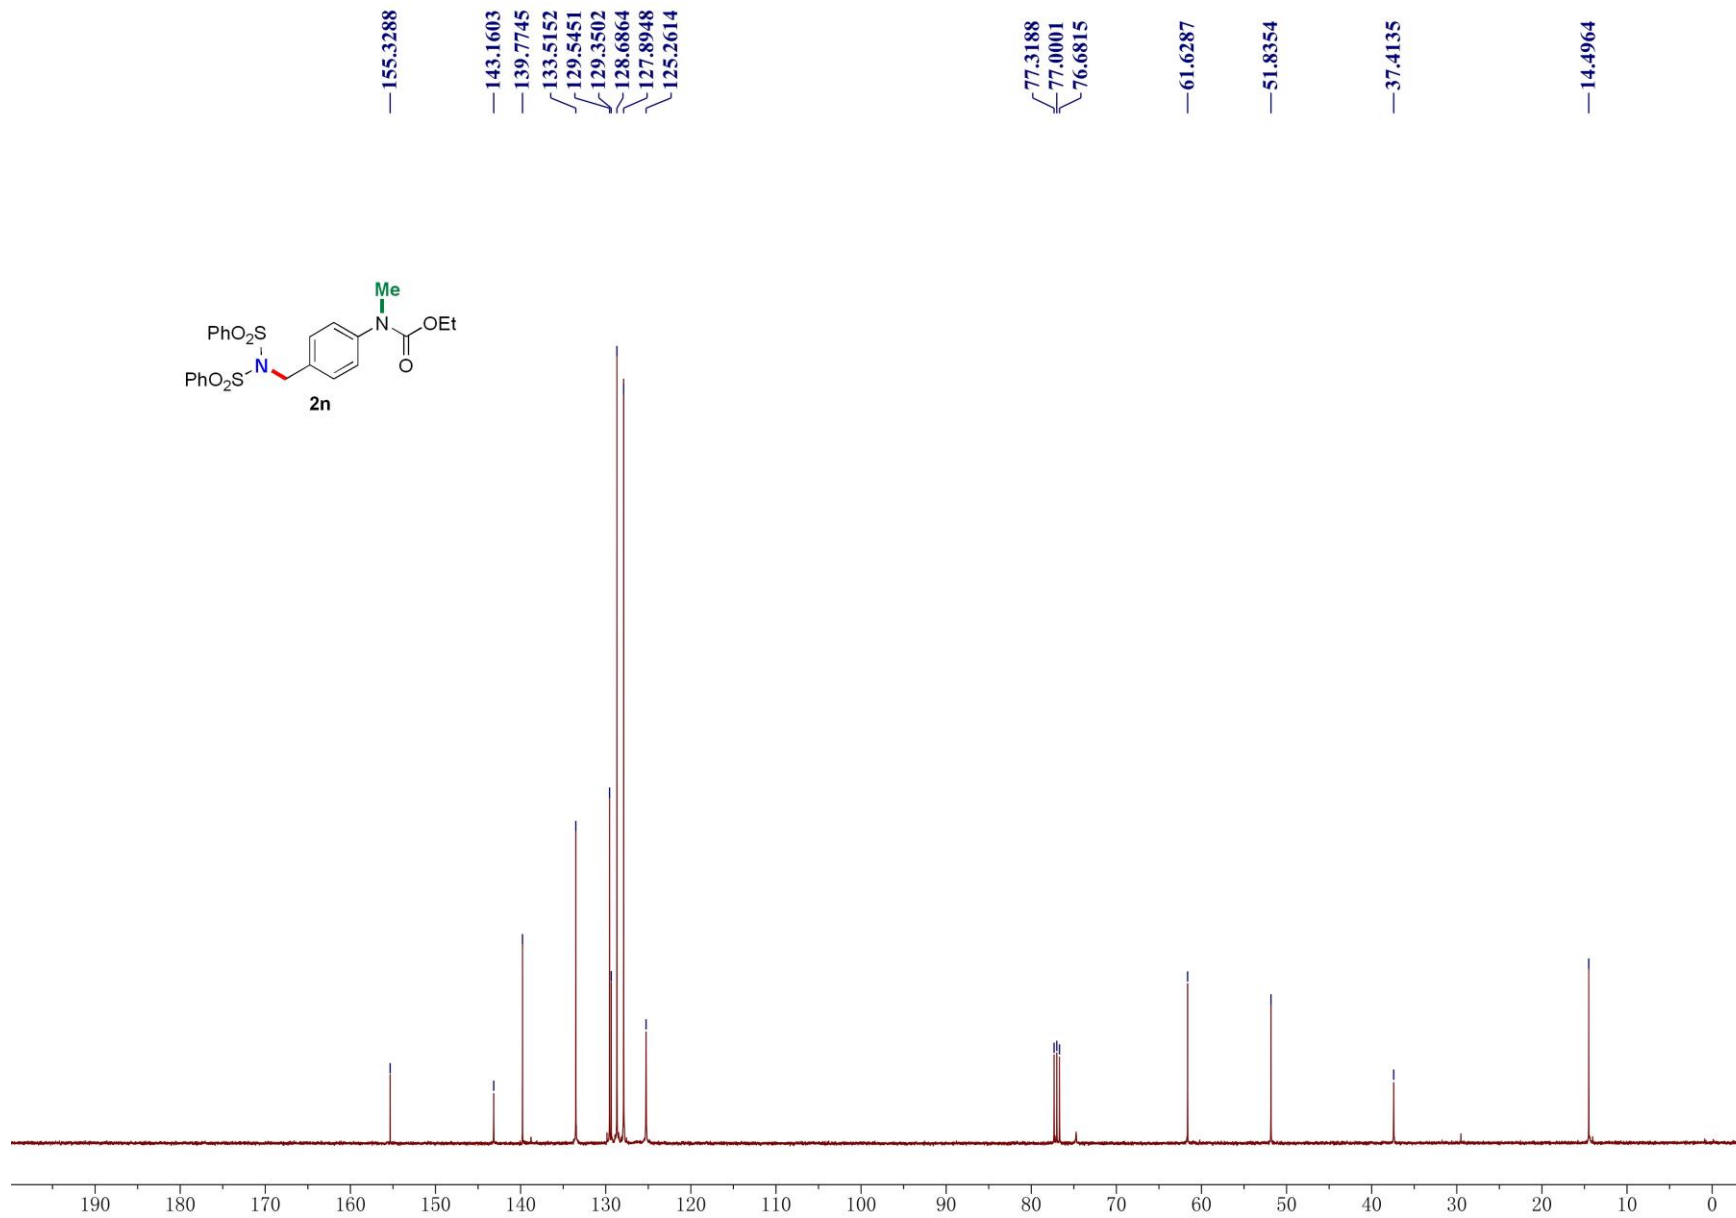

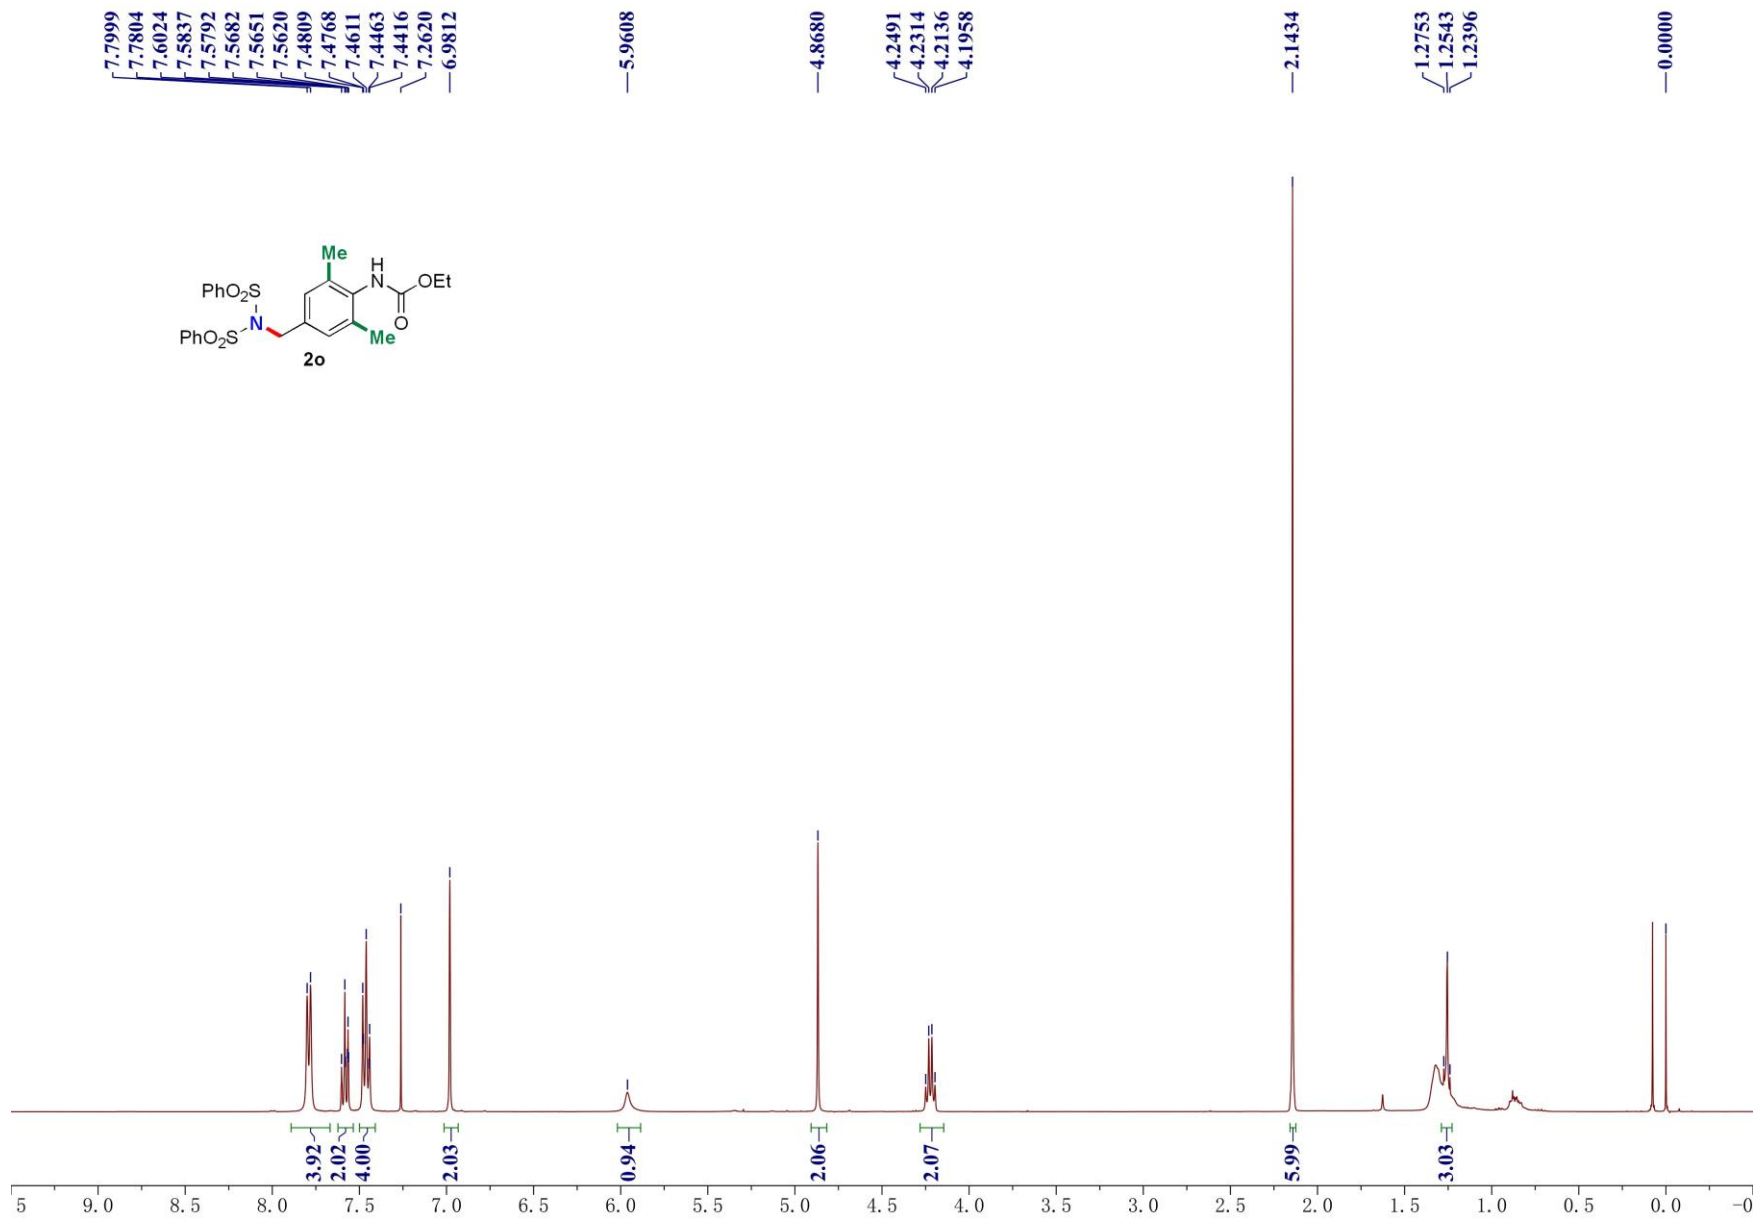

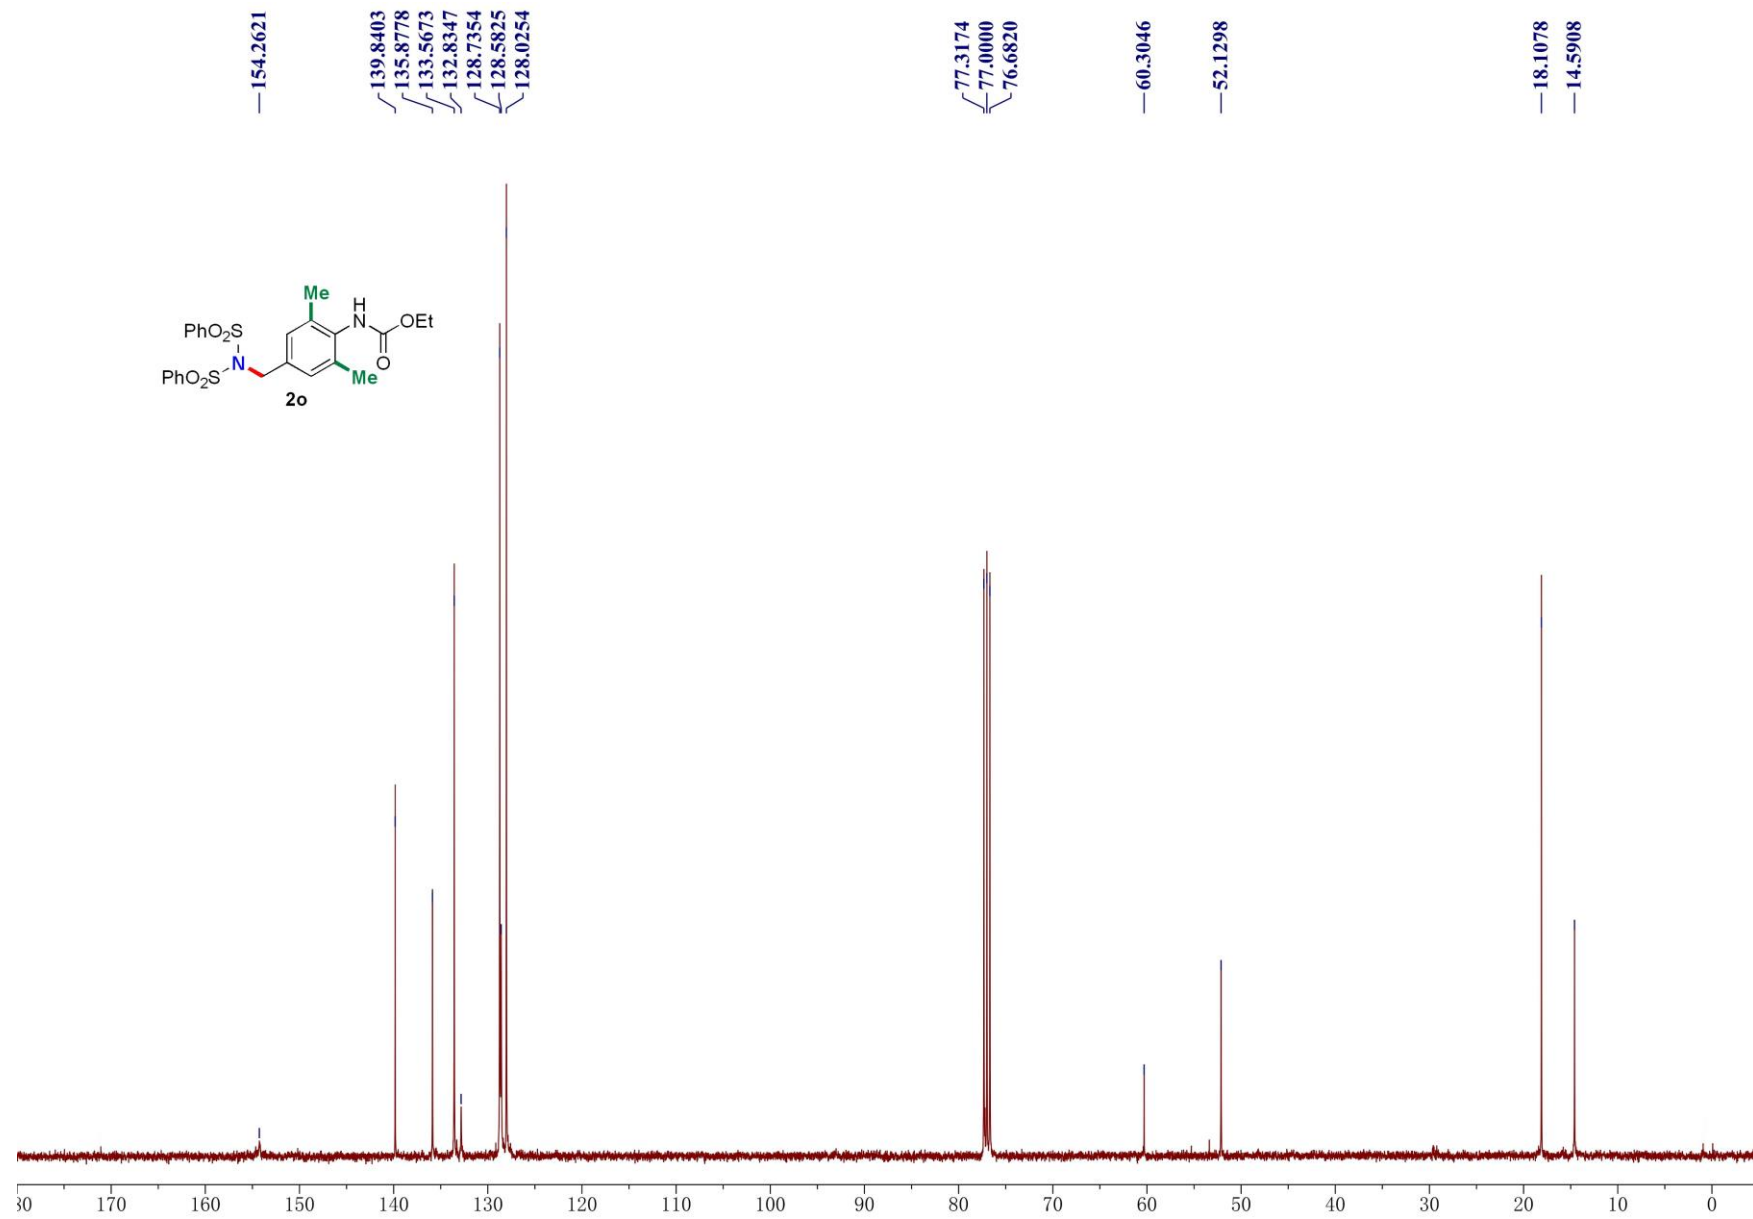

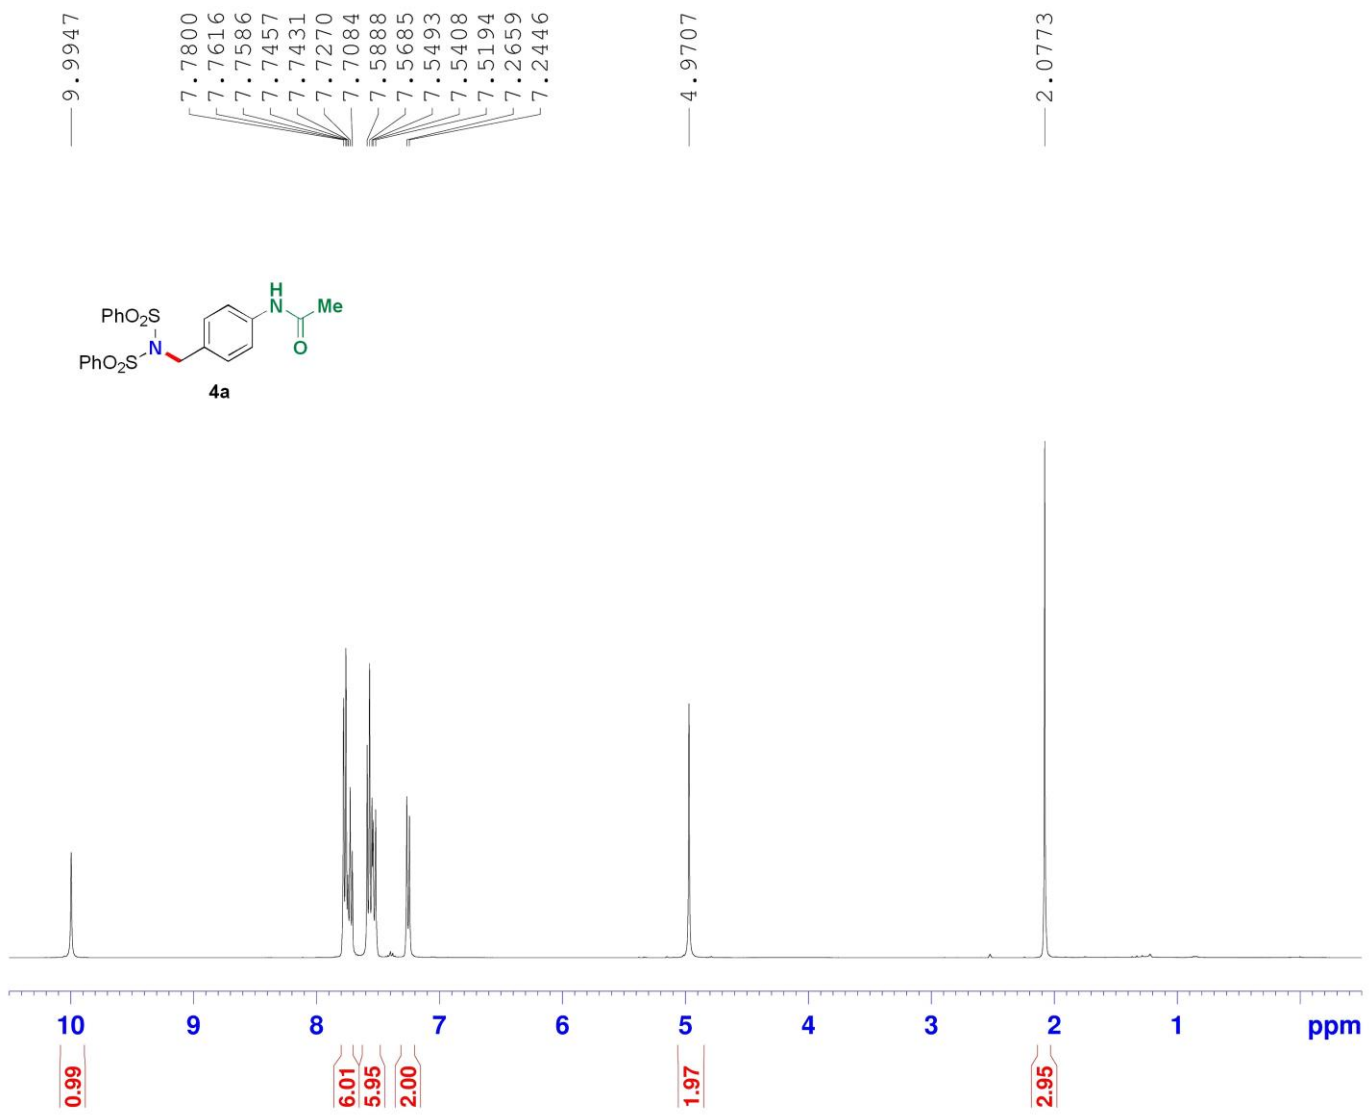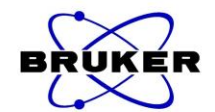

```

NAME          CLJ-WL-SZ023
EXPNO         1
PROCNO        1
Date_         20190530
Time          19.47
INSTRUM       spect
PROBHD        5 mm PABBO BB/
PULPROG       zg30
TD            65536
SOLVENT       DMSO
NS            8
DS            0
SWH           8012.820 Hz
FIDRES        0.122266 Hz
AQ            4.0894966 sec
RG            18.6
DW            62.400 usec
DE            6.50 usec
TE            300.7 K
D1            1.00000000 sec
TD0           1
===== CHANNEL f1 =====
SFO1          400.1324710 MHz
NUC1          1H
P1            8.04 usec
SI            65536
SF            400.1299970 MHz
WDW           EM
SSB           0
LB            0.30 Hz
GB            0
PC            1.00

```



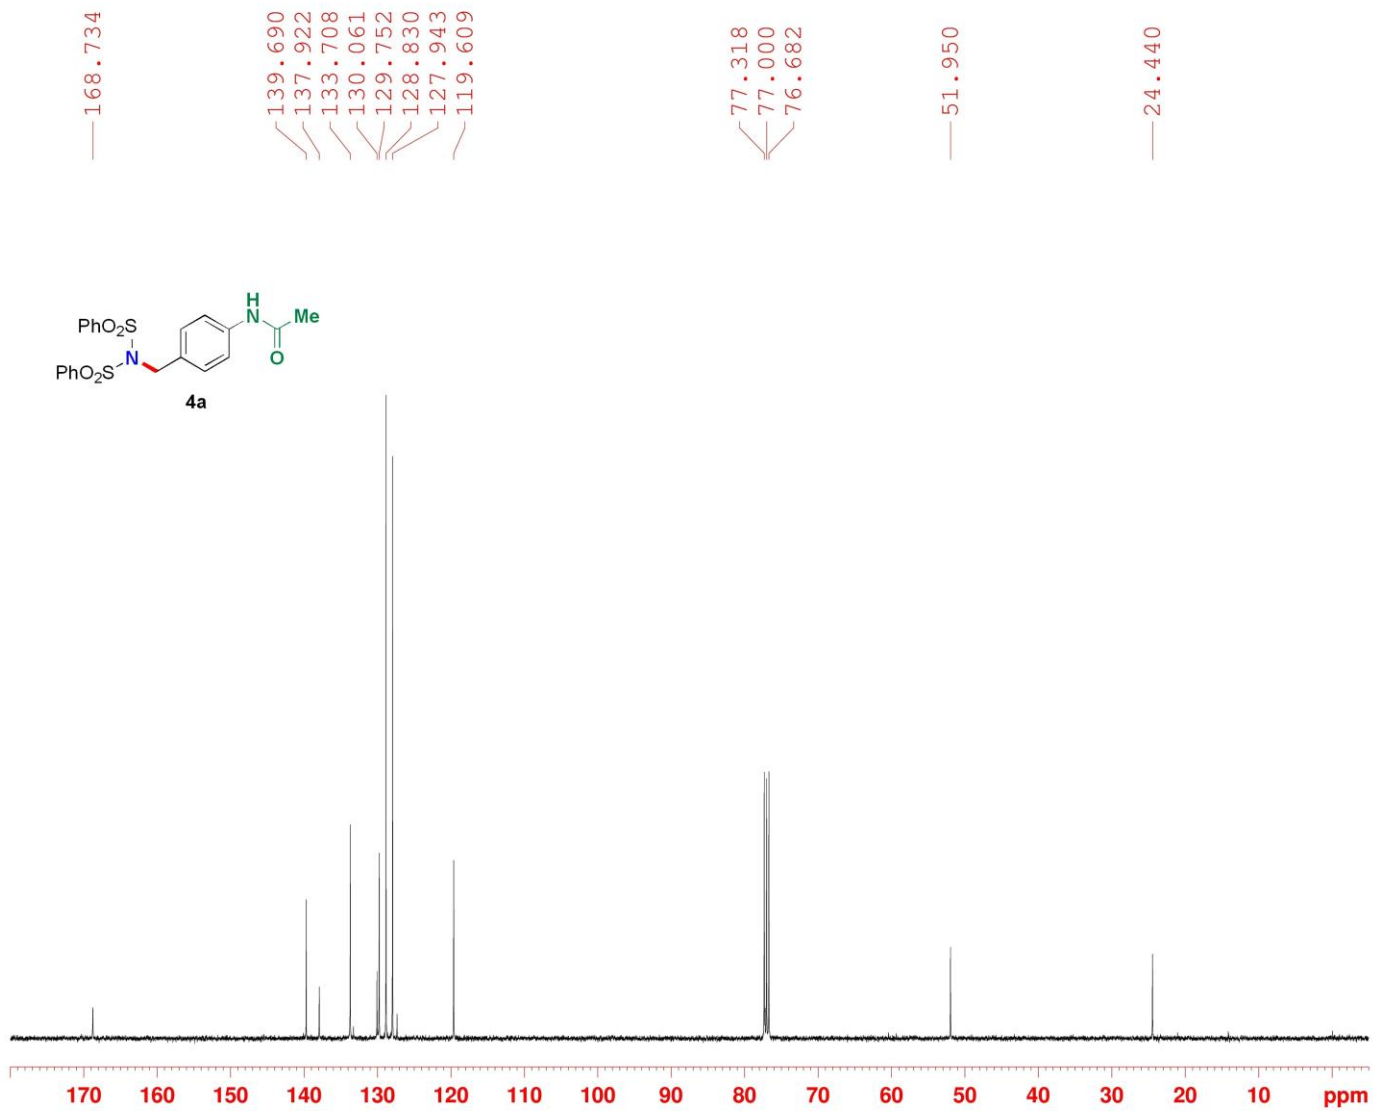

```

NAME      2019-06-24 shaozhong-047
EXPNO    1
PROCNO   1
Date_    20190624
Time     10.10 h
INSTRUM  spect
PROBHD   2116098_0673 (
PULPROG  zgpg30
TD       65536
SOLVENT  CDCl3
NS       256
DS       4
SWH      24038.461 Hz
FIDRES   0.733596 Hz
AQ       1.3631988 sec
RG       203.48
DW       20.800 usec
DE       6.50 usec
TE       296.1 K
D1       2.0000000 sec
D11      0.0300000 sec
TDO      1
SFO1     100.6228298 MHz
NUC1     13C
P1       10.00 usec
SI       32768
SF       100.6127791 MHz
WDW      EM
SSB      0
LB       1.00 Hz
GB       0
PC       1.40

```

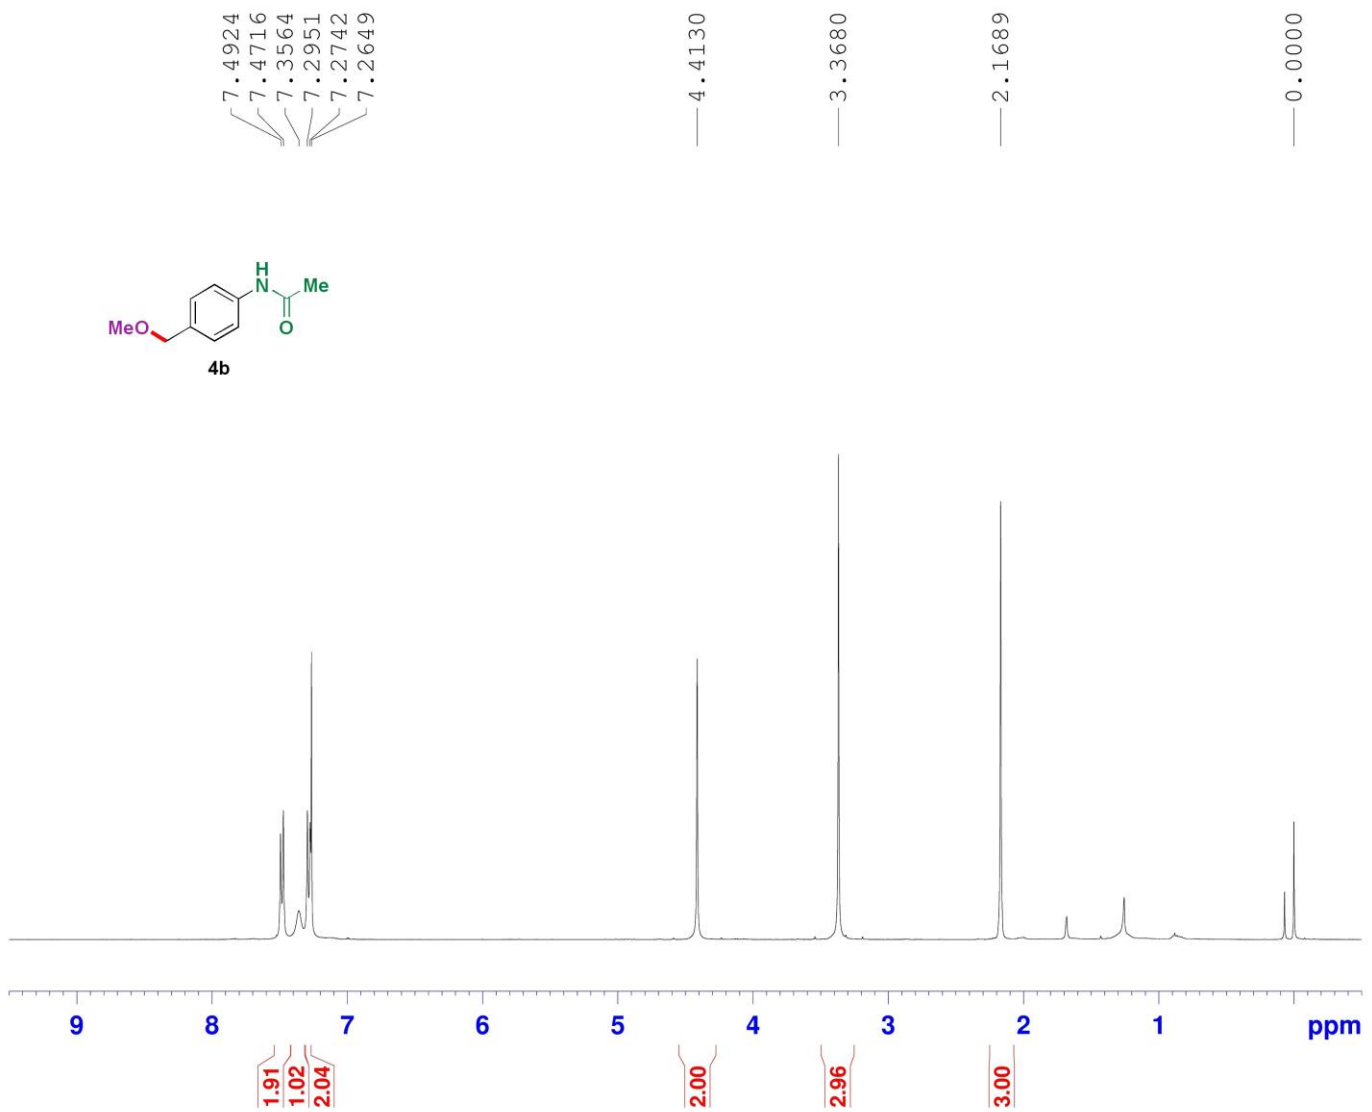

**BRUKER**

```

NAME      2019-09-29 shaozhong-089
EXPNO    1
PROCNO   1
Date_    20190929
Time     10.19 h
INSTRUM  spect
PROBHD   z116098_0673 (
PULPROG  zg30
TD        65536
SOLVENT  CDCl3
NS        16
DS        2
SWH       8012.820 Hz
FIDRES    0.244532 Hz
AQ         4.0894966 sec
RG         80.75
DW        62.400 usec
DE         6.50 usec
TE        295.8 K
D1        1.00000000 sec
TD0       1
SFO1      400.1324708 MHz
NUC1      1H
P1        10.00 usec
SI        65536
SF        400.1300078 MHz
WDW       EM
SSB       0
LB        0.30 Hz
GB        0
PC        1.00
  
```

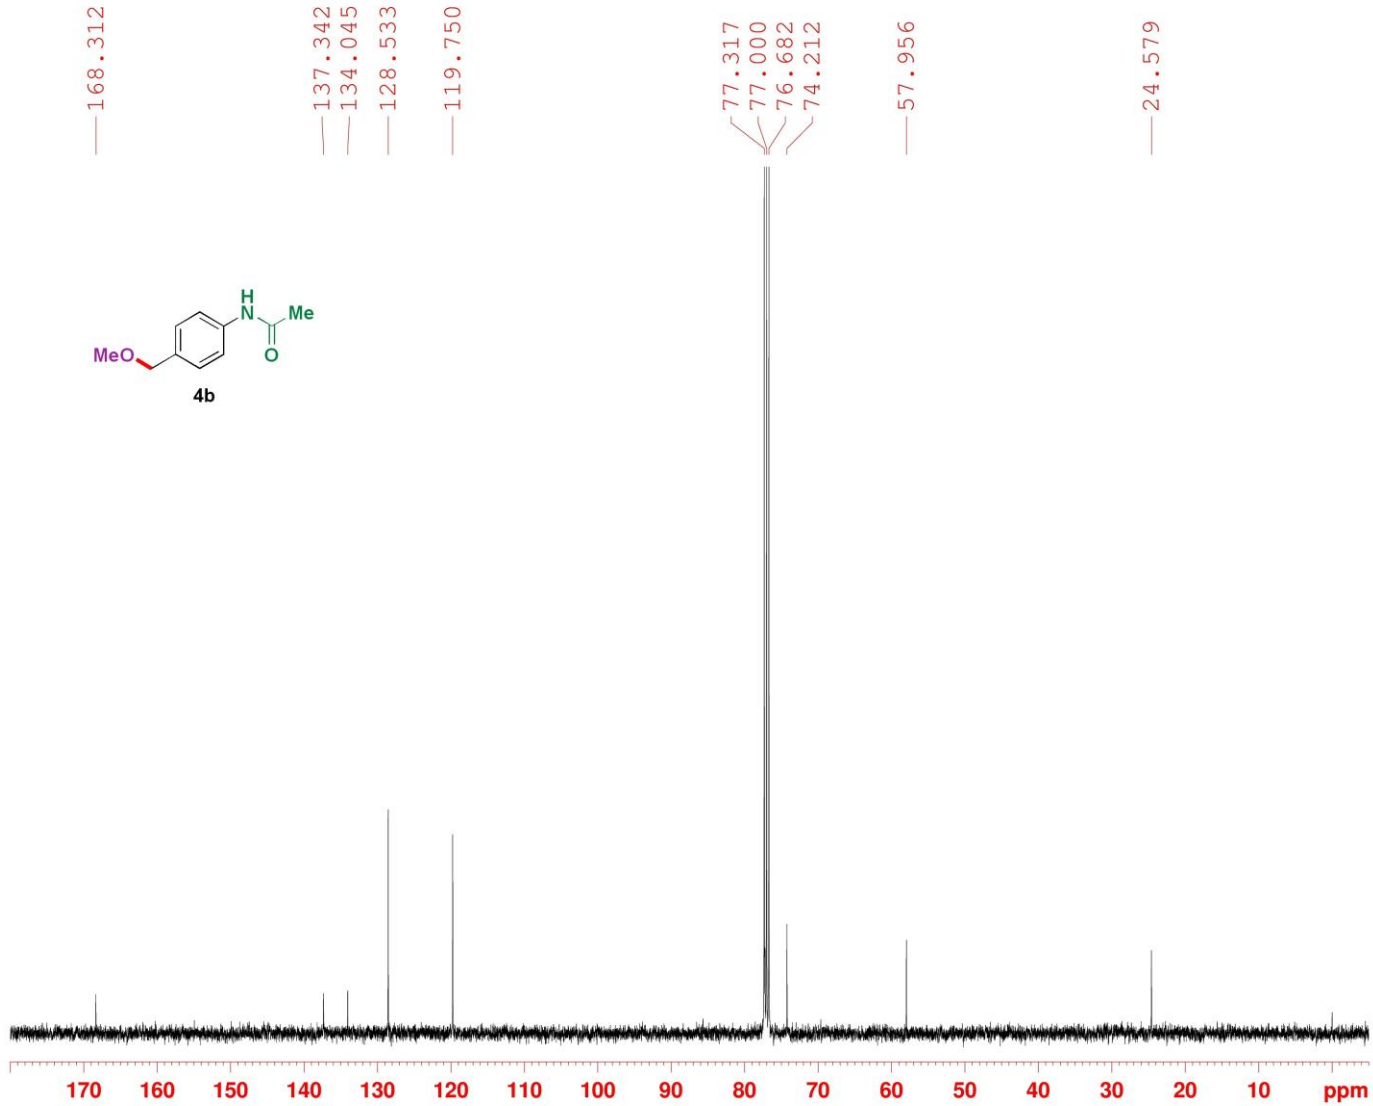

```

NAME      2019-09-29 shaozhong-089
EXPNO     2
PROCNO    1
Date_     20190929
Time      10.34 h
INSTRUM   spect
PROBHD    2116098_0673 (
PULPROG   zgpg30
TD         65536
SOLVENT   CDCl3
NS         256
DS         4
SWH        24038.461 Hz
FIDRES     0.733596 Hz
AQ         1.3631988 sec
RG         203.48
DW         20.800 usec
DE         6.50 usec
TE         296.5 K
D1         2.0000000 sec
D11        0.0300000 sec
TDO        1
SFO1       100.6228298 MHz
NUC1       13C
P1         10.00 usec
SI         32768
SF         100.6127726 MHz
WDW        EM
SSB        0
LB         1.00 Hz
GB         0
PC         1.40
  
```

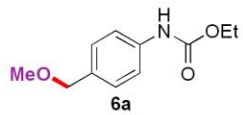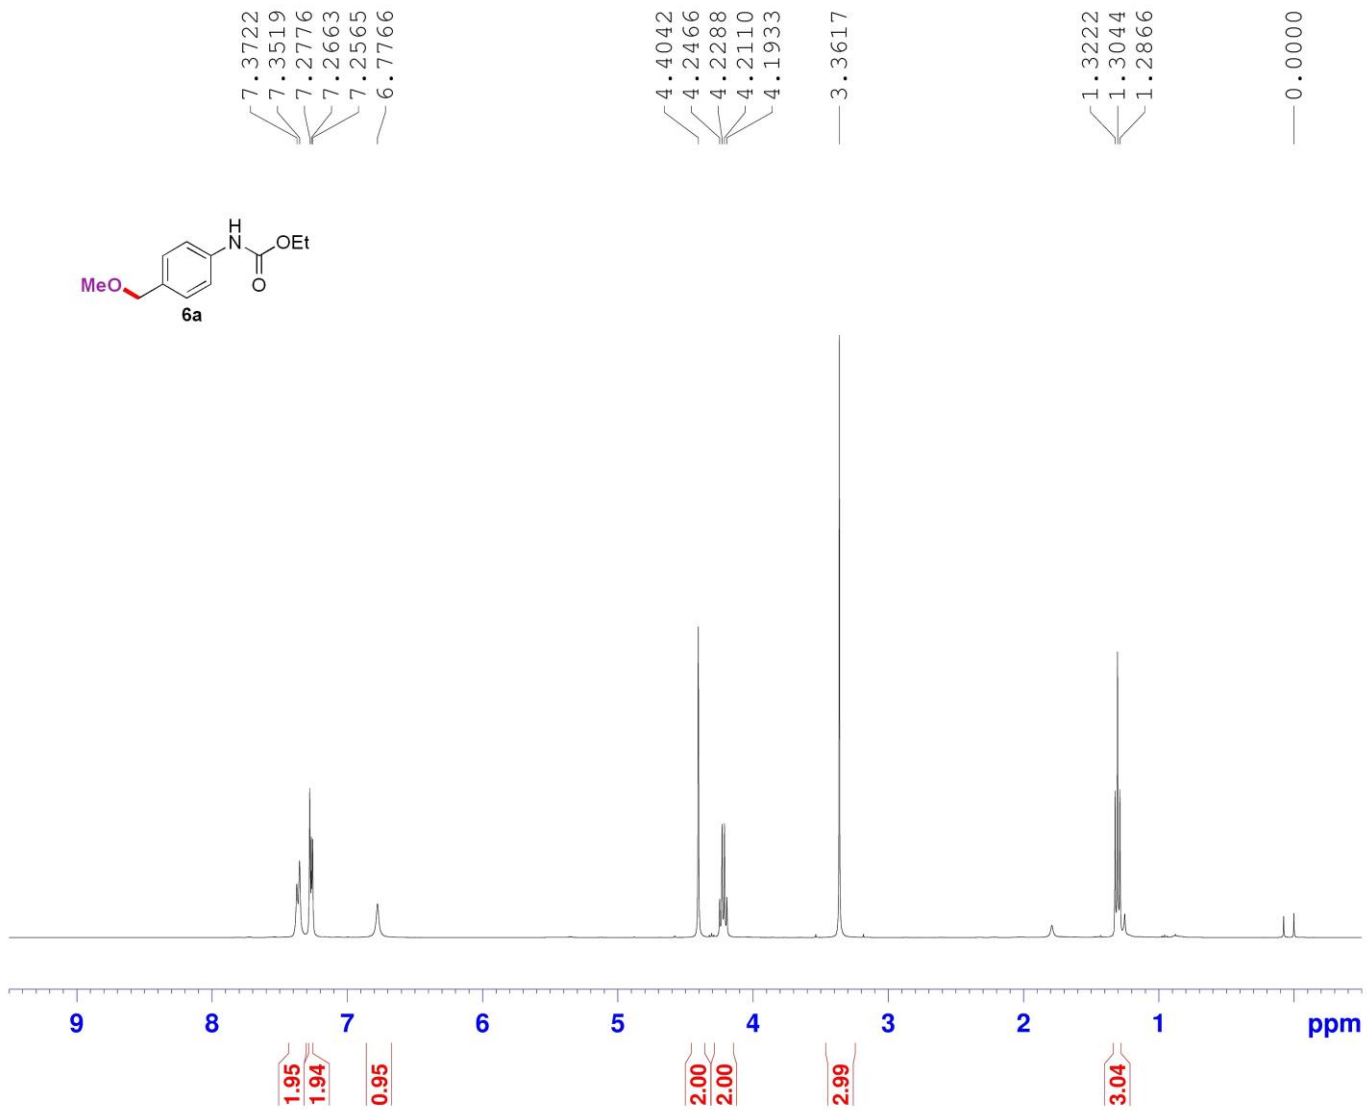

```

NAME      2019-09-12 yangdong-SZ081
EXPNO    1
PROCNO   1
Date_    20190913
Time     0.18 h
INSTRUM  spect
PROBHD   z116098_0673 (
PULPROG  zg30
TD        65536
SOLVENT  CDCl3
NS        16
DS        2
SWH       8012.820 Hz
FIDRES    0.244532 Hz
AQ        4.0894966 sec
RG        31.12
DW        62.400 usec
DE        6.50 usec
TE        294.7 K
D1        1.00000000 sec
TD0       1
SFO1     400.1324708 MHz
NUC1      1H
P1        10.00 usec
SI        65536
SF        400.1300072 MHz
W6W       EM
SGB       0
LB        0.30 Hz
GB        0
PC        1.00
  
```

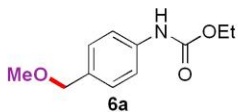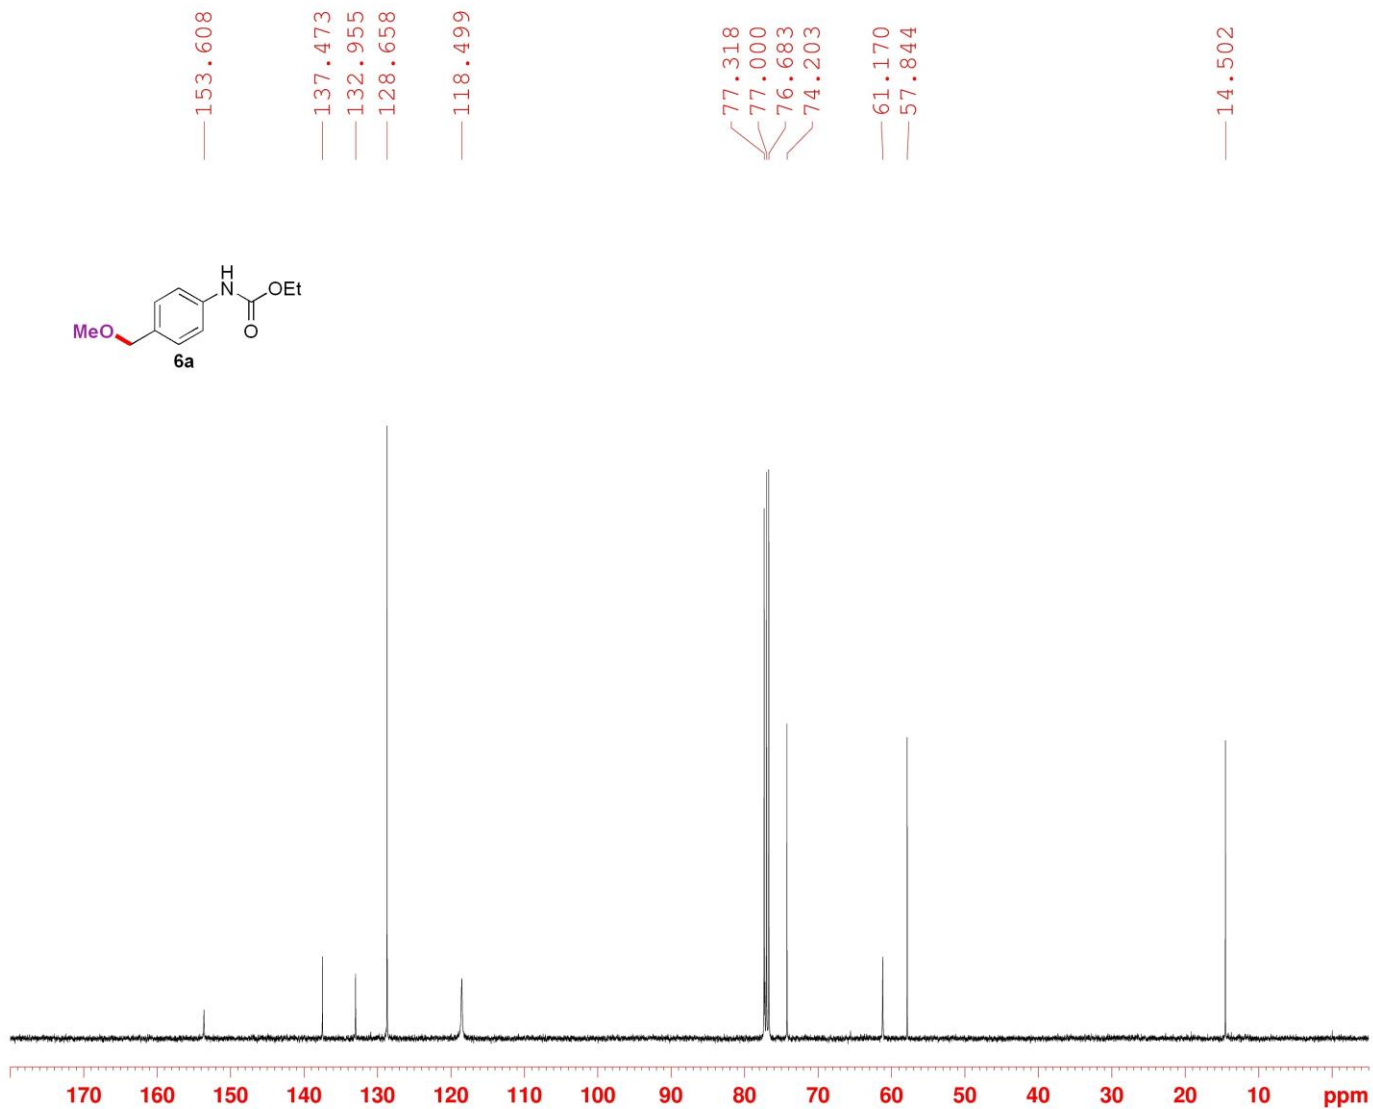

```

NAME      2019-09-12 yangdong-SZ081
EXPNO     2
PROCNO    1
Date_     20190913
Time      0.47 h
INSTRUM   spect
PROBHD    Z116098_0673 (
PULPROG   zgpg30
TD         65536
SOLVENT   CDCl3
NS         512
DS         4
SWH        26041.666 Hz
FIDRES     0.794729 Hz
AQ         1.2383412 sec
RG         203.48
DW         19.200 usec
DE         6.50 usec
TE         295.1 K
D1         2.00000000 sec
D11        0.03000000 sec
TD0        1
SFO1       100.6228298 MHz
NUC1       13C
P1         10.00 usec
SI         32768
SF         100.6127753 MHz
WDW        EM
SSB        0
LB         1.00 Hz
GB         0
PC         1.40
  
```

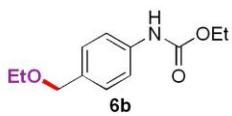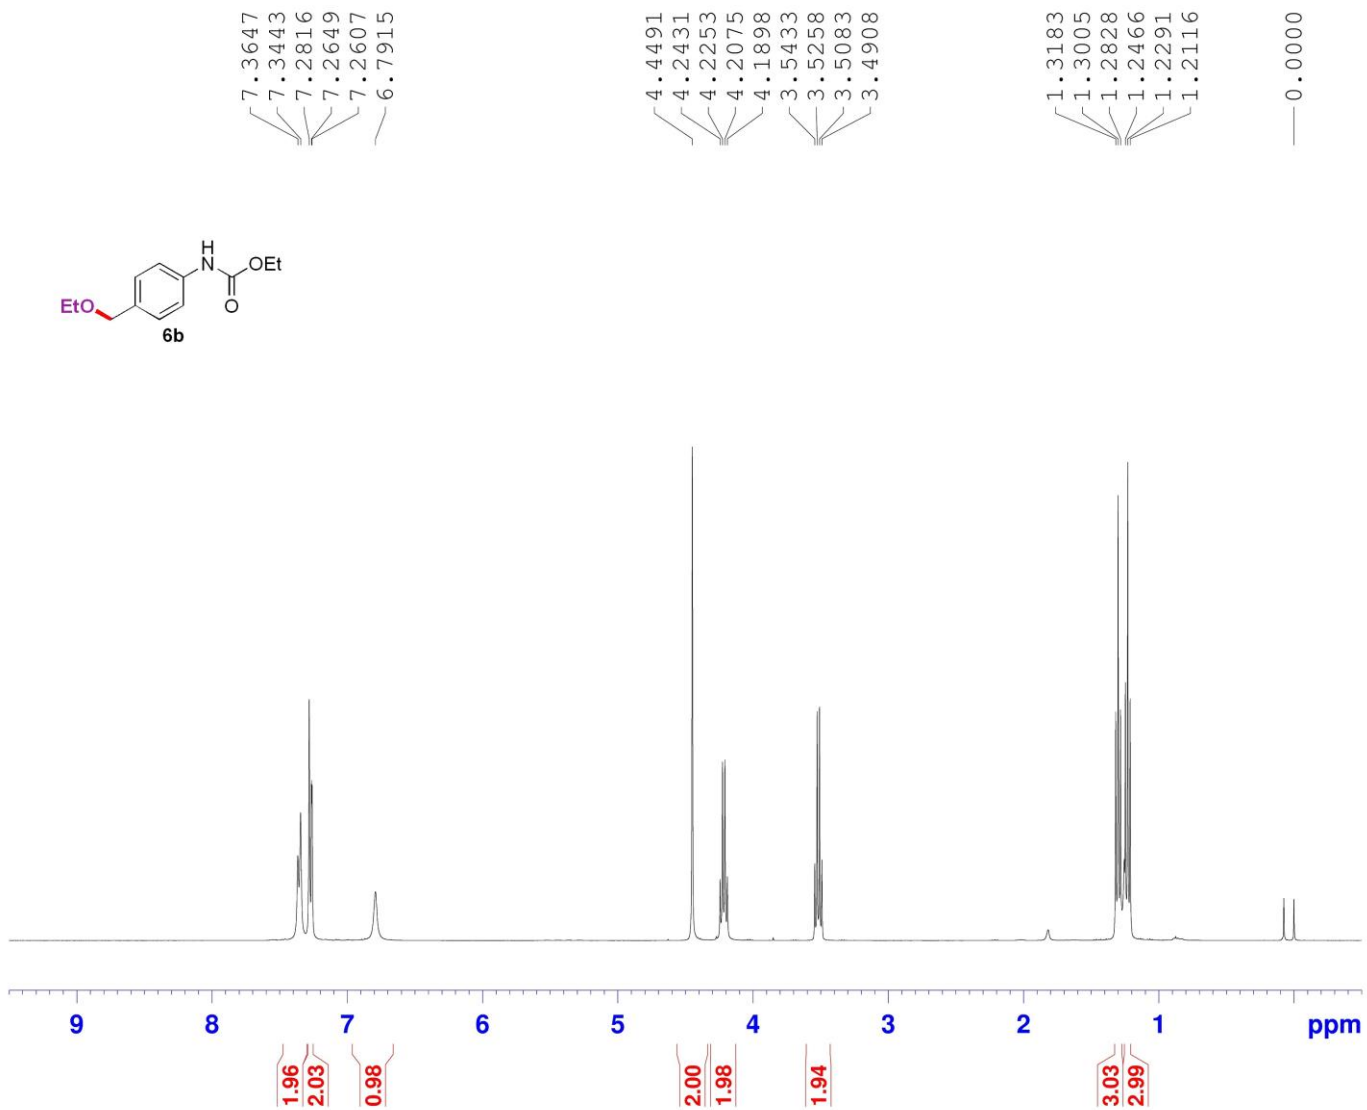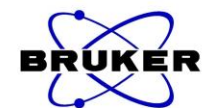

NAME 2019-09-29 shaozhong-088  
 EXPNO 1  
 PROCNO 1  
 Date\_ 20190929  
 Time 9.58 h  
 INSTRUM spect  
 PROBRD z116098\_0673 (1  
 PULPROG zg30  
 TD 65536  
 SOLVENT CDCl3  
 NS 16  
 DS 2  
 SWH 8012.820 Hz  
 FIDRES 0.244532 Hz  
 AQ 4.0894966 sec  
 RG 31.12  
 DW 62.400 usec  
 DE 6.50 usec  
 TE 295.9 K  
 D1 1.00000000 sec  
 TD0 1  
 SFO1 400.1324708 MHz  
 NUC1 1H  
 P1 10.00 usec  
 SI 65536  
 SF 400.1300076 MHz  
 WDW EK  
 SSB 0  
 LB 0.30 Hz  
 GB 0  
 PC 1.00

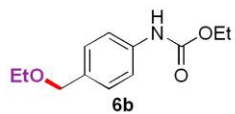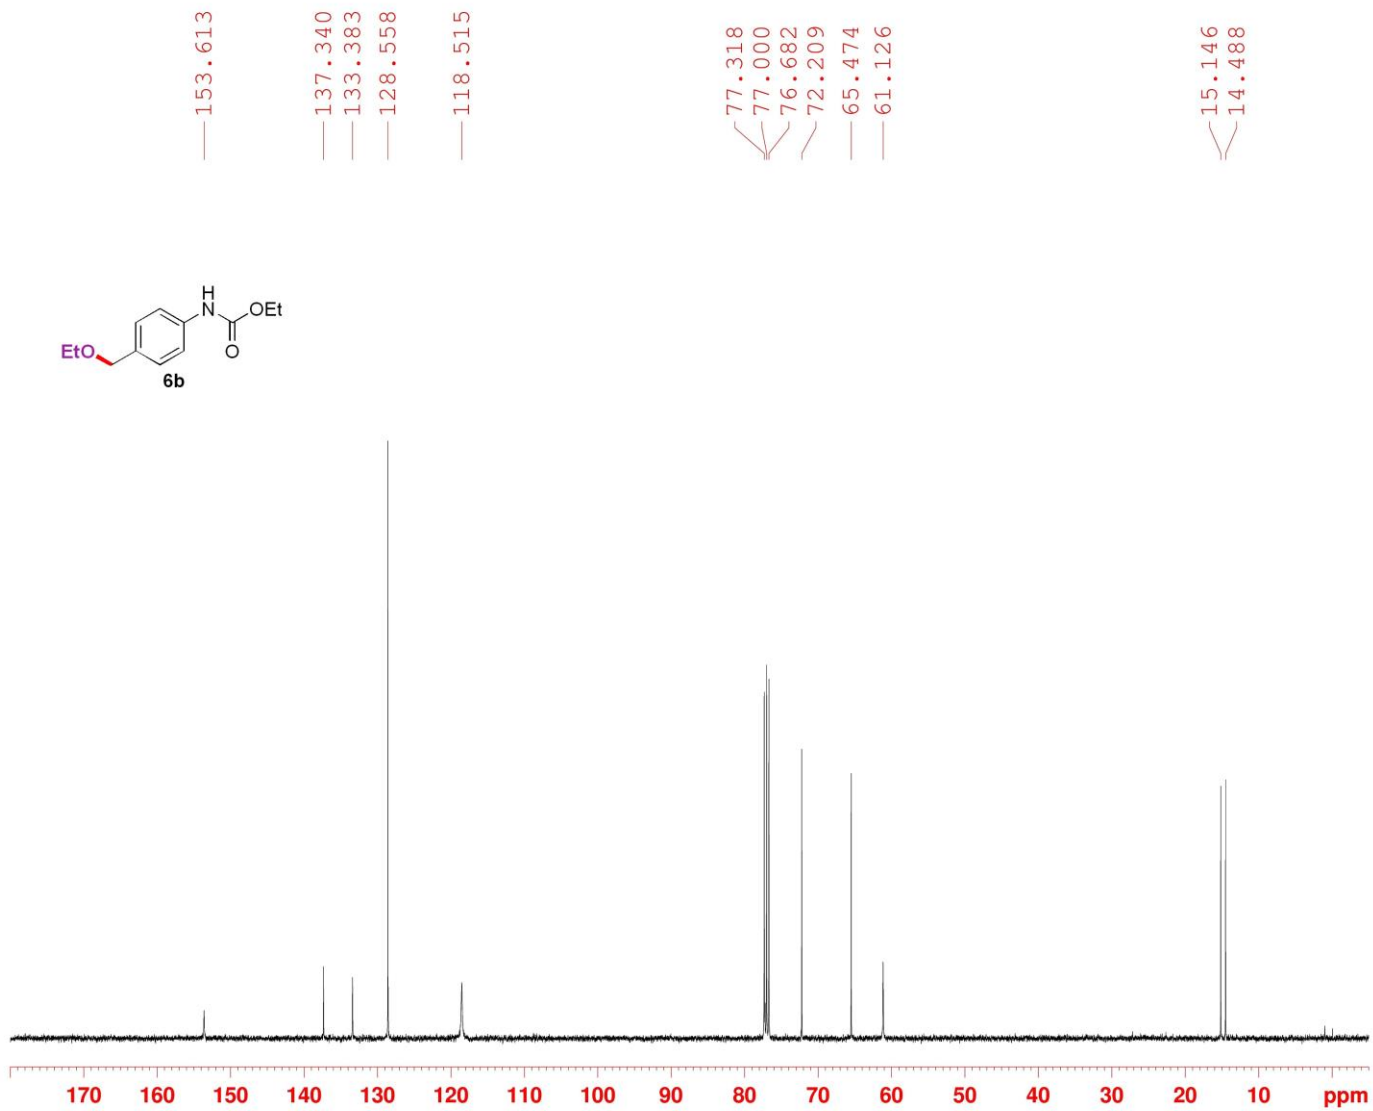

```

NAME      2019-09-29 shaozhong-088
EXPNO    2
PROCNO    1
Date_     20190929
Time      10.14 h
INSTRUM   spect
PROBHD    2116098_0673 (
PULPROG   zgpg30
TD         65536
SOLVENT   CDCl3
NS         256
DS         4
SWH        24038.461 Hz
FIDRES     0.733596 Hz
AQ         1.3631988 sec
RG         203.48
DW         20.800 usec
DE         6.50 usec
TE         296.1 K
D1         2.0000000 sec
D11        0.0300000 sec
TD0        1
SFO1      100.6228298 MHz
NUC1       13C
P1         10.00 usec
SI         32768
SF         100.6127765 MHz
WDW        EM
SSB        0
LB         1.00 Hz
GB         0
PC         1.40
  
```

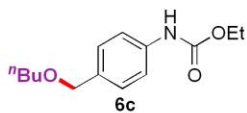

7.3642  
7.3439  
7.2730  
7.2647  
7.2519  
6.8448

4.4417  
4.2409  
4.2231  
4.2053  
4.1876  
3.4620  
3.4455  
3.4289  
1.6196  
1.6026  
1.5958  
1.5853  
1.5654  
1.5488  
1.4256  
1.4073  
1.3883  
1.3693  
1.3510  
1.3327  
1.3149  
1.2972  
1.2794  
0.9244  
0.9060  
0.8875  
0.0000

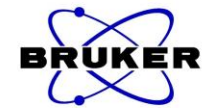

```

NAME      2019-11-11 shaozhong-S2102
EXPNO    1
PROCNO   1
Date_    20191111
Time     20.58 h
INSTRUM  spect
PROBHD   zg30
PULPROG  zg30
TD        65536
SOLVENT  CDCl3
NS        16
DS        2
SWH       8012.820 Hz
FIDRES    0.244532 Hz
AQ        4.0894966 sec
RG        31.12
DW        62.400 usec
DE        6.50 usec
TE        295.8 K
D1        1.00000000 sec
TDO       1
SFO1     400.1324708 MHz
NUC1     1H
P1        10.00 usec
S1        65536
SF        400.1300078 MHz
WOM       EM
SBB       0
LB        0.30 Hz
GB        0
PC        1.00
  
```

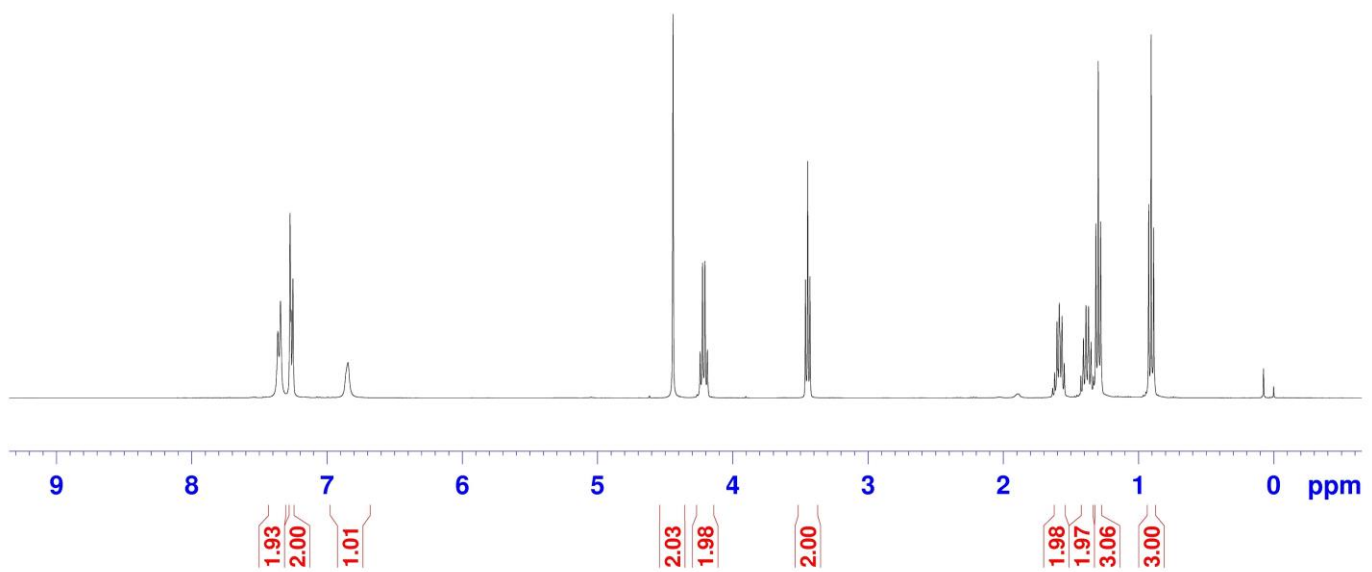



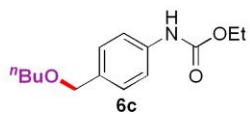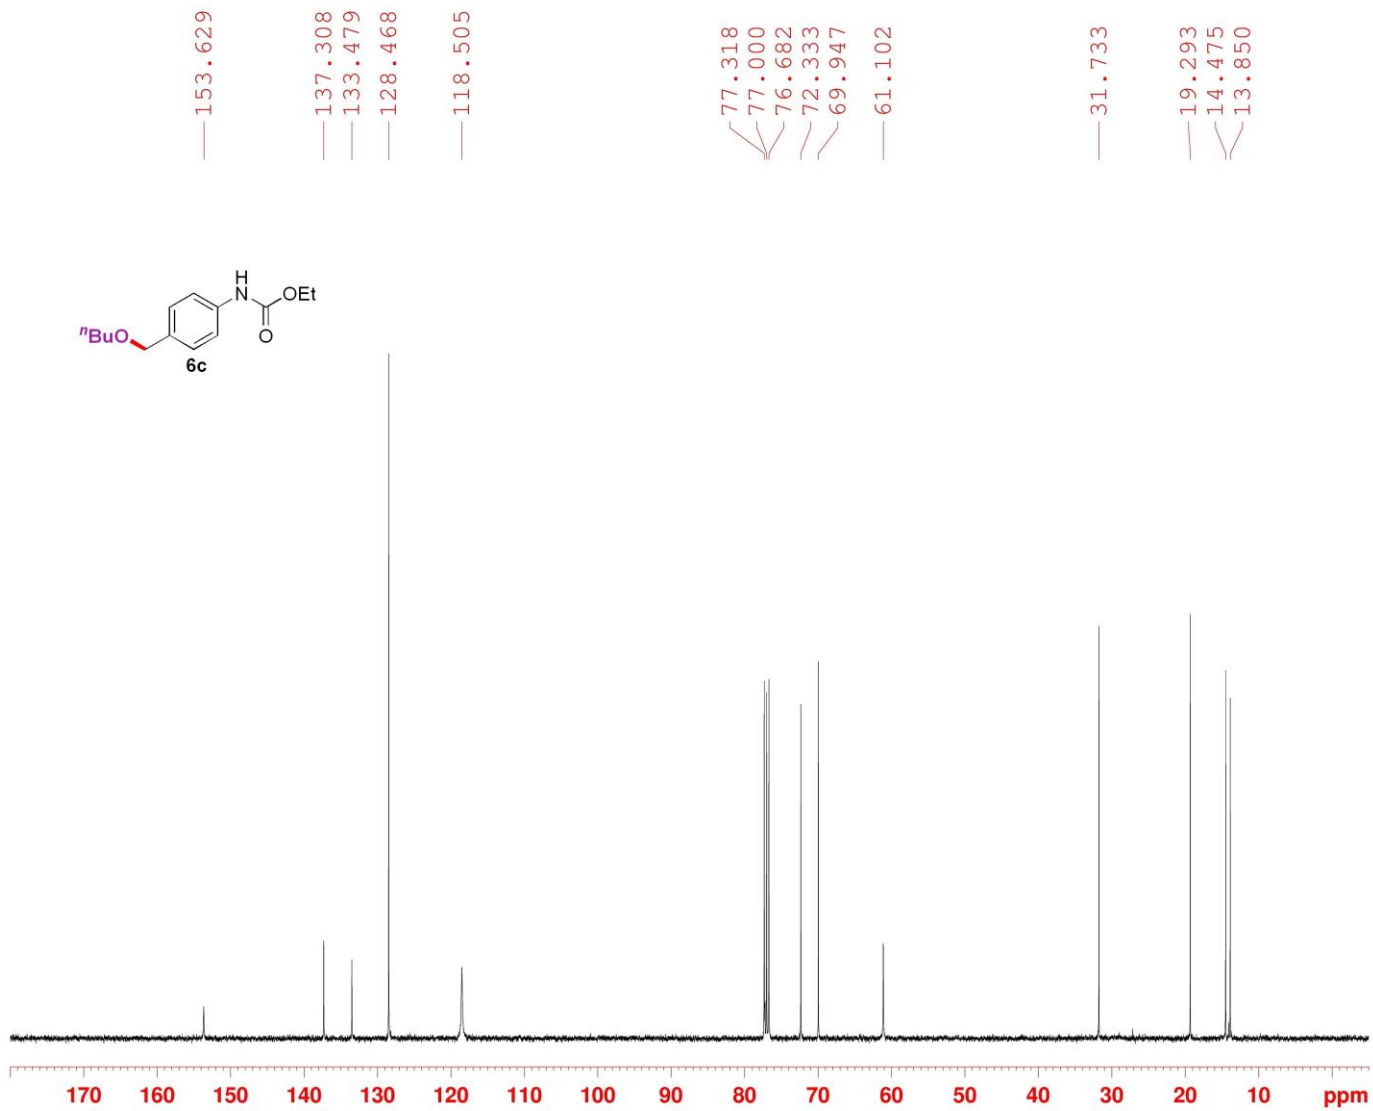

```

NAME      2019-11-11  shaohong-S2102
EXPNO     2
PROCNO    1
Date_     20191111
Time      21:14 h
INSTRUM   spect
PROBHD    E116098_0673 (
PULPROG   zgpg30
TD         65536
SOLVENT   CDCl3
NS         256
DS         4
SWH        24038.461 Hz
FIDRES     0.733596 Hz
AQ         1.3631988 sec
RG         203.48
DW         20.800 usec
DE         6.50 usec
TE         296.4 K
D1         2.0000000 sec
D11        0.0300000 sec
TDO        1
SF01       100.6228298 MHz
NUC1       13C
P1         10.00 usec
SI         32768
SF         100.6127776 MHz
WDW        EM
SSB        0
LB         1.00 Hz
GB         0
PC         1.40
  
```

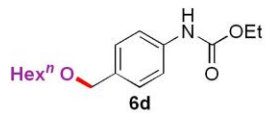

7.3639  
7.3438  
7.2753  
7.2627  
7.2544  
6.7929

4.4426  
4.2426  
4.2248  
4.2071  
4.1893  
3.4529  
3.4362  
3.4195

1.6297  
1.6130  
1.5958  
1.5764  
1.5594  
1.3616  
1.3464  
1.3171  
1.2994  
1.2815  
1.2610  
0.8948  
0.8783  
0.8608  
0.0000



```

NAME      2019-11-11 shaozhong-S2103
EXPNO     1
PROCNO    1
Date_     20191111
Time      21.19 h
INSTRUM   spect
PROBHD    z116098_0673 (
PULPROG   zg30
TD         65536
SOLVENT   CDCl3
NS         16
DS         2
SWH        8012.820 Hz
FIDRES     0.244532 Hz
AQ         4.0894966 sec
RG         31.12
DW         62.400 usec
DE         6.50 usec
TE         295.9 K
D1         1.00000000 sec
TDO        1
SFO1       400.1324708 MHz
NUC1       1H
P1         10.00 usec
S1         65536
SF         400.1300085 MHz
WOM        EM
SBB         0
LB         0.30 Hz
GB         0
PC         1.00
  
```

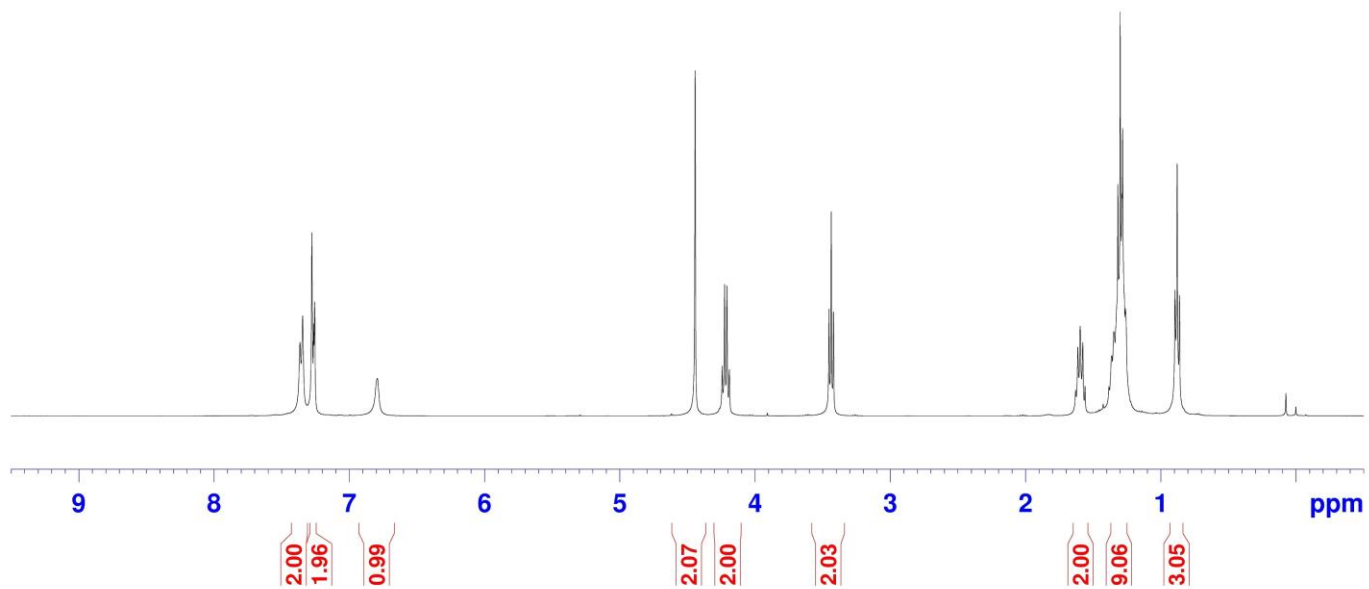

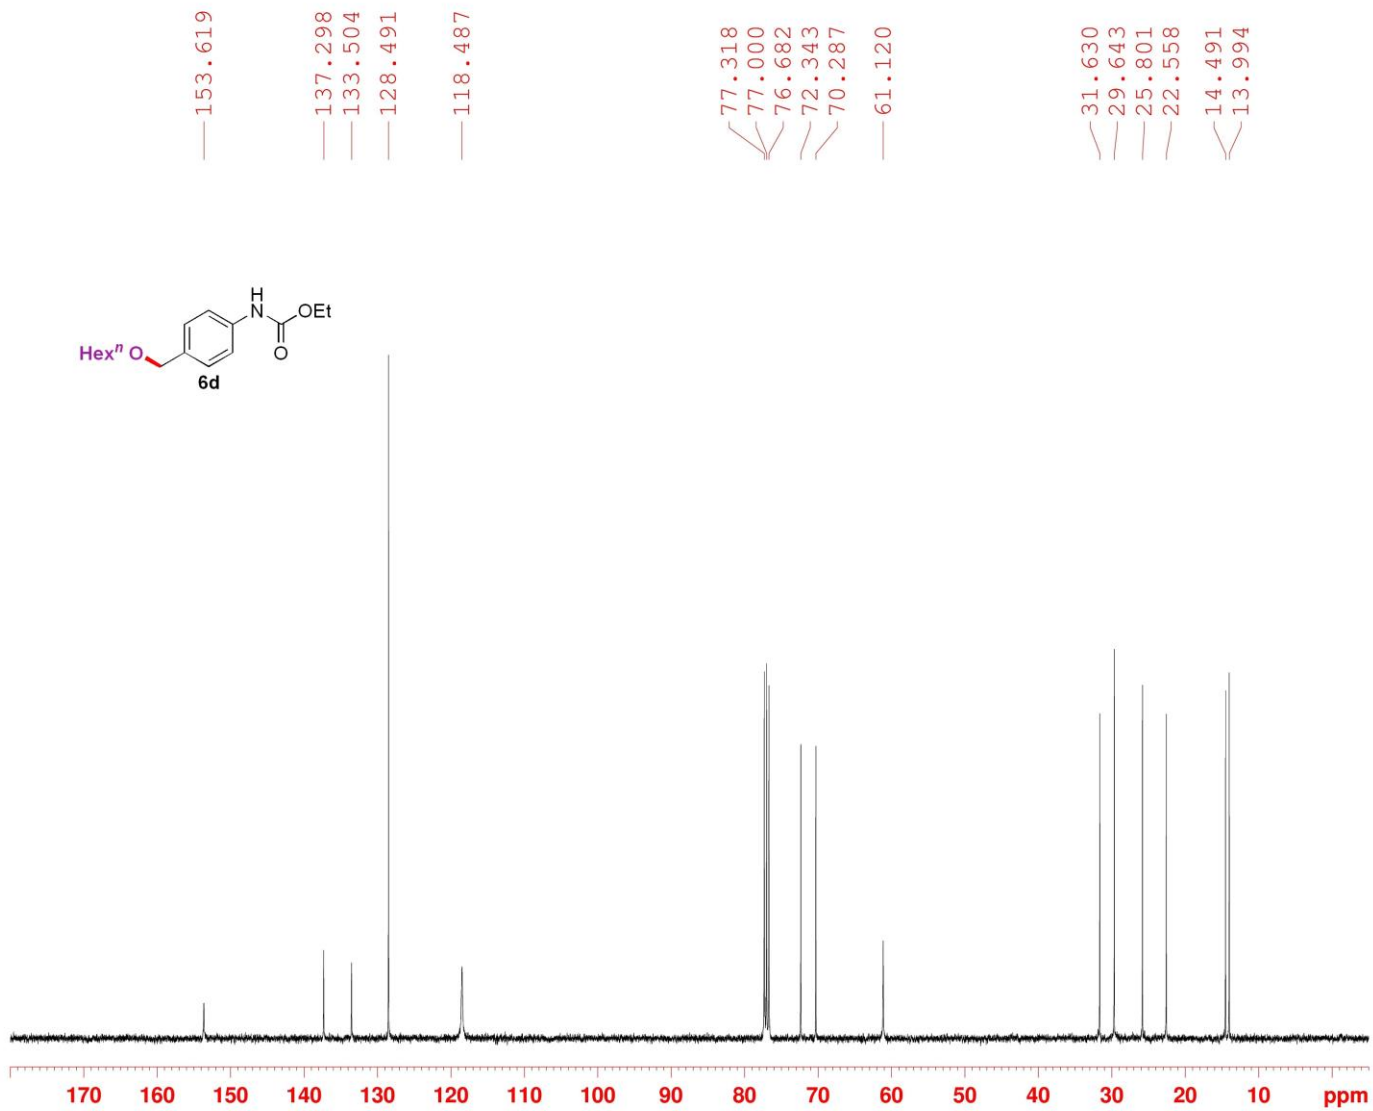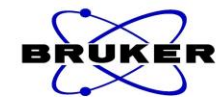

```

NAME      2019-11-11 shaozhong-S2103
EXPNO     2
PROCNO    1
Date_     20191111
Time      21.35 h
INSTRUM   spect
PROBHD    E116098_0673 (
PULPROG   zgpg30
TD         65536
SOLVENT   CDCl3
NS         256
DS         4
SWH        24038.461 Hz
FIDRES     0.733596 Hz
AQ         1.3631988 sec
RG         203.48
DW         20.800 usec
DE         6.50 usec
TE         295.8 K
D1         2.0000000 sec
D11        0.03000000 sec
TDO        1
SF01       100.6228298 MHz
NUC1       13C
P1         10.00 usec
SI         32768
SF         100.6127767 MHz
WDW        EM
SSB        0
LB         1.00 Hz
GB         0
PC         1.40
  
```

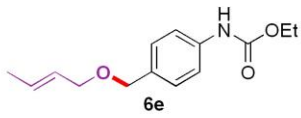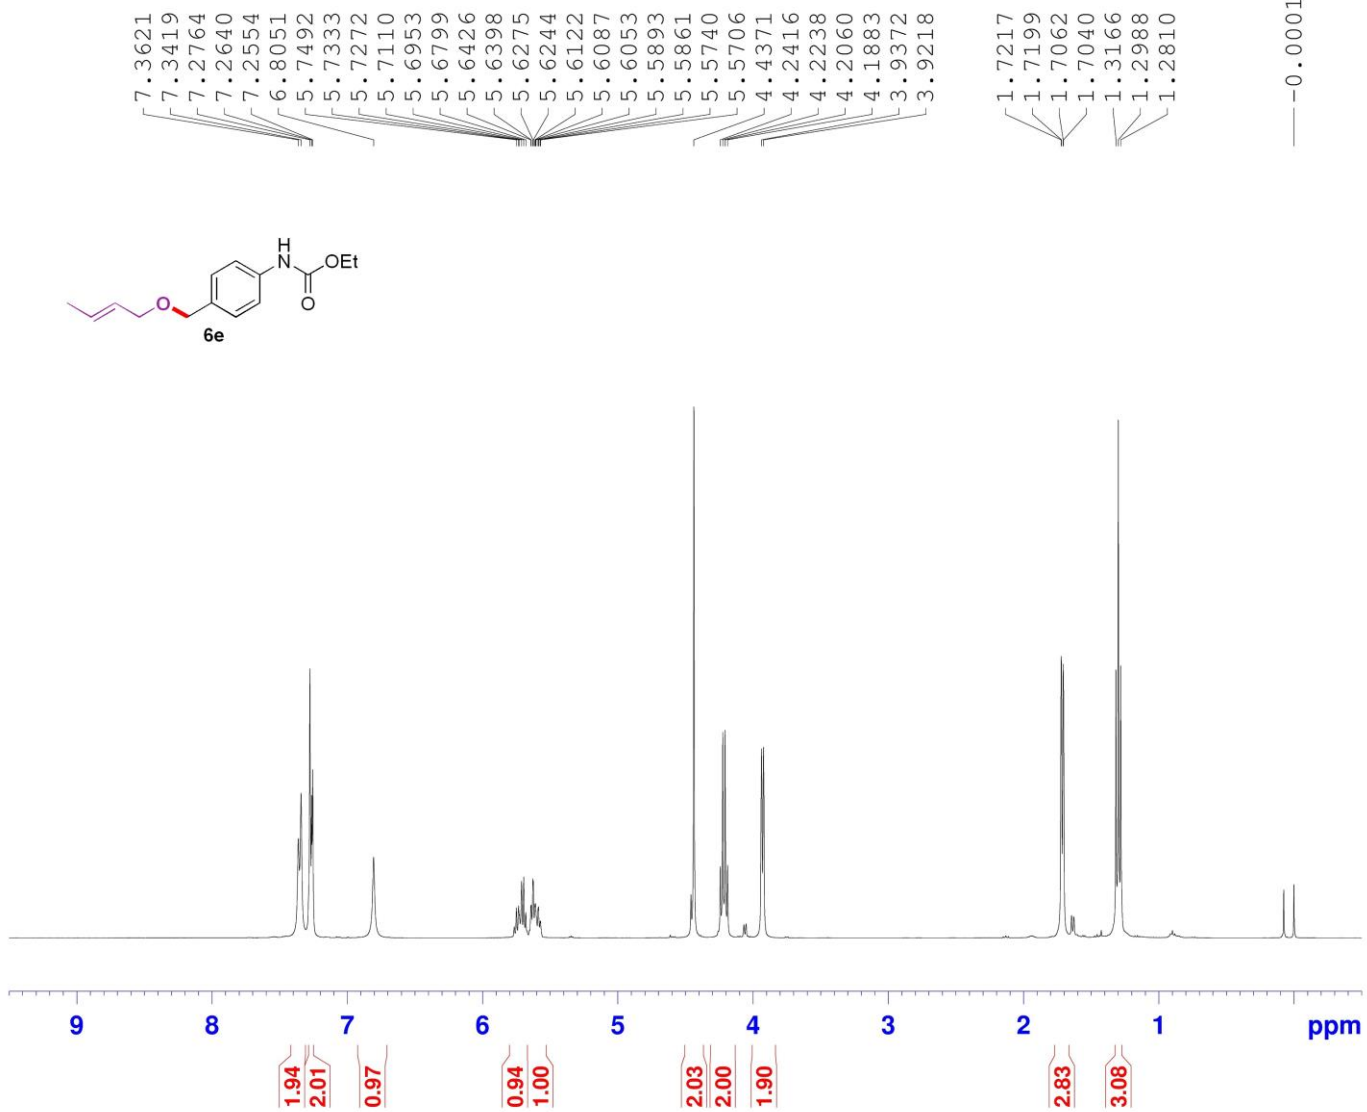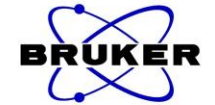

```

NAME      2019-11-14 shaozhong-SZ111
EXPNO    1
PROCNO   1
Date_    20191114
Time     23.31 h
INSTRUM  spect
PROBHD   z116098_0673 (
PULPROG  zg30
TD       65536
SOLVENT  CDCl3
NS       16
DS       2
SWH      8012.820 Hz
FIDRES   0.244532 Hz
AQ       4.0894966 sec
RG       31.12
DW       62.400 usec
DE       6.50 usec
TE       296.0 K
D1       1.00000000 sec
TDO      1
SFO1     400.1324708 MHz
NUC1     1H
P1       10.00 usec
S1       65536
SF       400.1300080 MHz
WOM      EM
SBB      0
LB       0.30 Hz
GB       0
PC       1.00
  
```

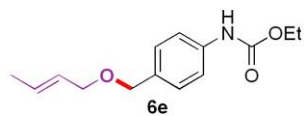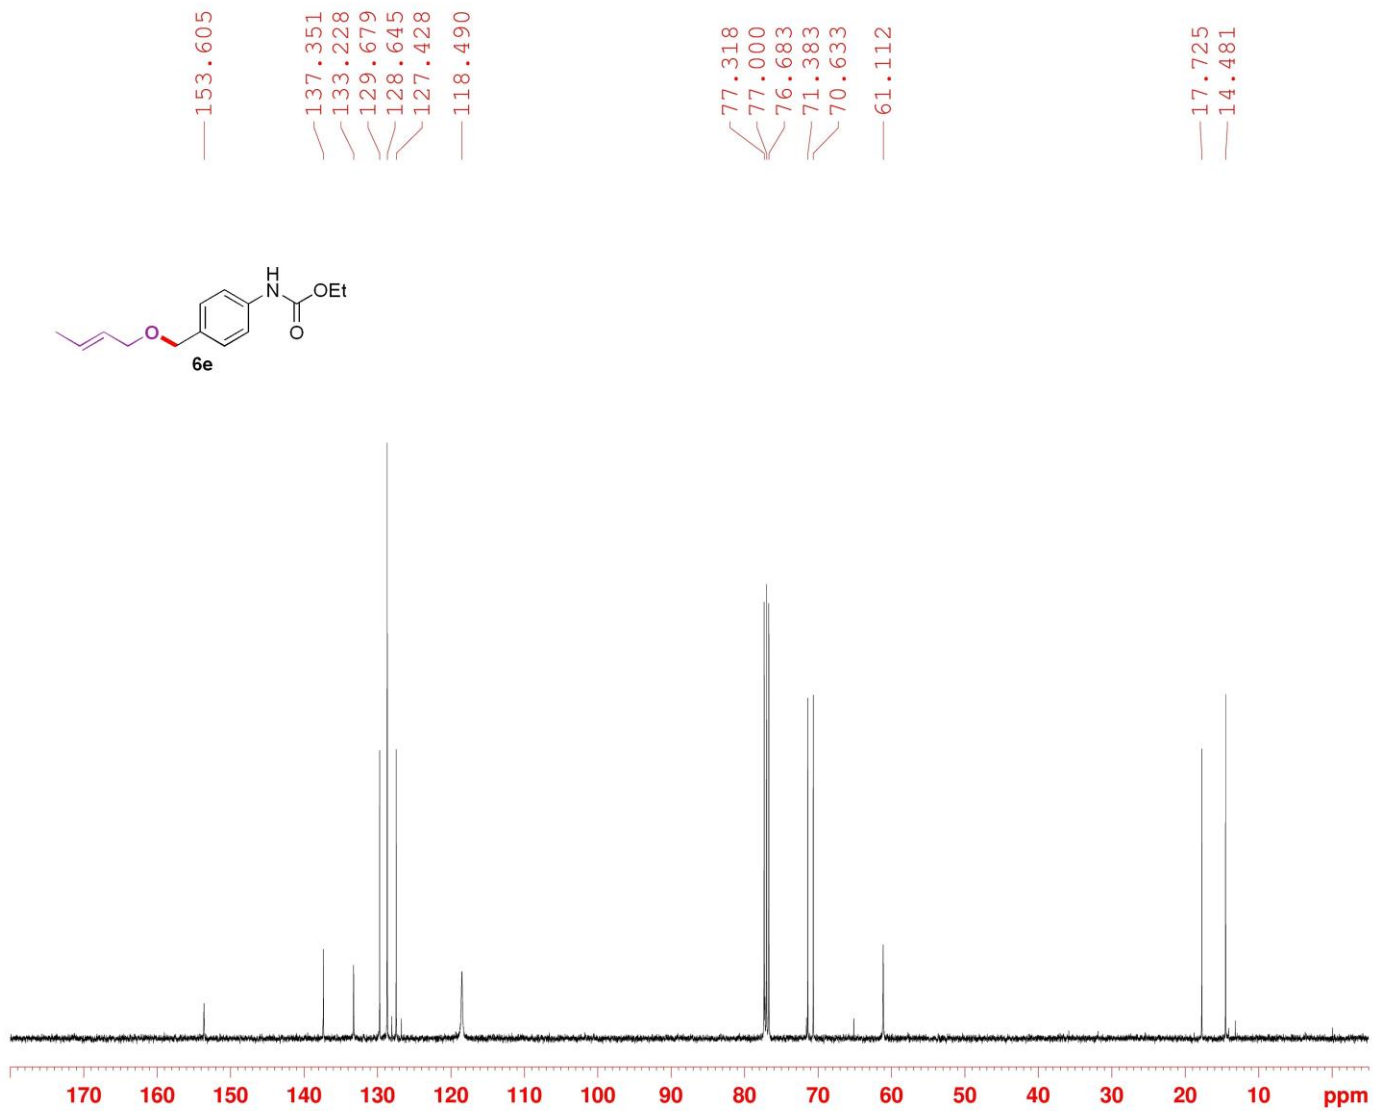

```

NAME      2019-11-14 shaohong-S2111
EXPNO     2
PROCNO    1
Date_     20191114
Time      23.46 h
INSTRUM   spect
PROBHD    E116098_0673 (
PULPROG   zgpg30
TD         65536
SOLVENT   CDCl3
NS         256
DS         4
SWH        26041.666 Hz
FIDRES     0.7947229 Hz
AQ         1.2583412 sec
RG         203.48
DW         19.200 usec
DE         6.50 usec
TE         295.7 K
D1         2.0000000 sec
D11        0.03000000 sec
TDO        1
SF01       100.6228298 MHz
NUC1       13C
P1         10.00 usec
SI         32768
SF         100.6127773 MHz
WDW        EM
SSB        0
LB         1.00 Hz
GB         0
PC         1.40
  
```

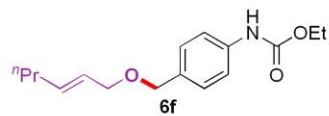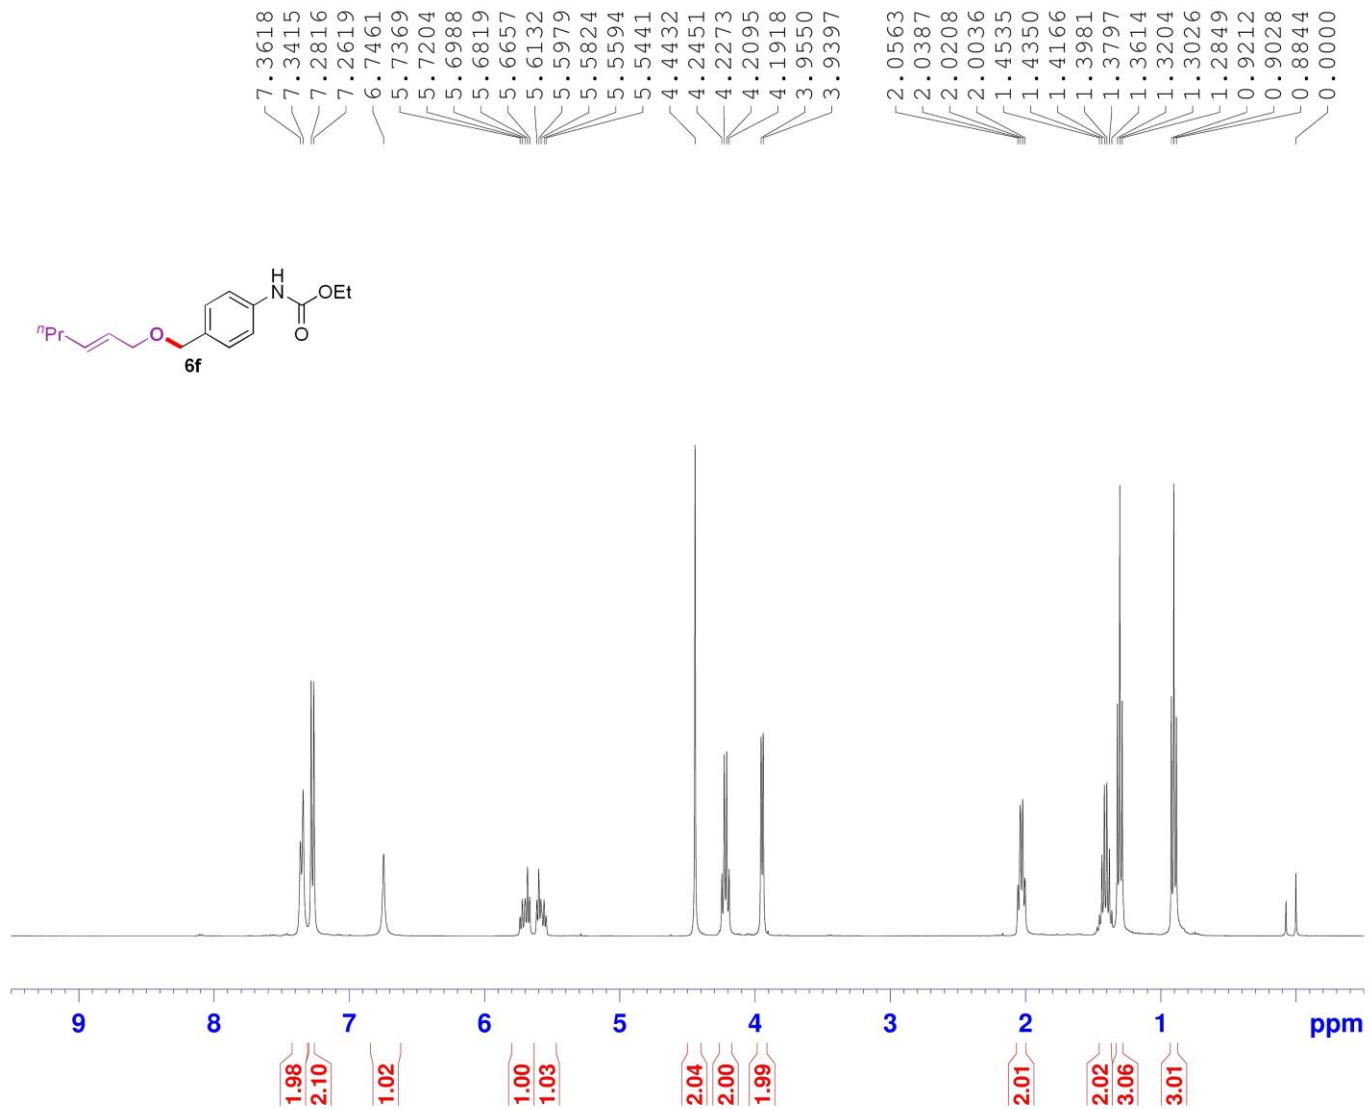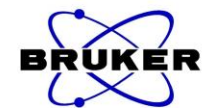

```

NAME      2019-11-18 shaozhong-SZ116
EXPNO     1
PROCNO    1
Date_     20191118
Time      18.39 h
INSTRUM   spect
PROBHD    z116098_0673 (
PULPROG   zg30
TD         65536
SOLVENT   CDCl3
NS         16
DS         2
SWH        8012.820 Hz
FIDRES     0.244532 Hz
AQ         4.0894966 sec
RG         31.12
DW         62.400 usec
DE         6.50 usec
TE         297.1 K
D1         1.00000000 sec
TDO        1
SFO1       400.1324708 MHz
NUC1       1H
P1         10.00 usec
S1         65536
SF         400.1300086 MHz
WOM        EM
SBB         0
LB         0.30 Hz
GB         0
PC         1.00
  
```

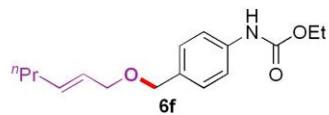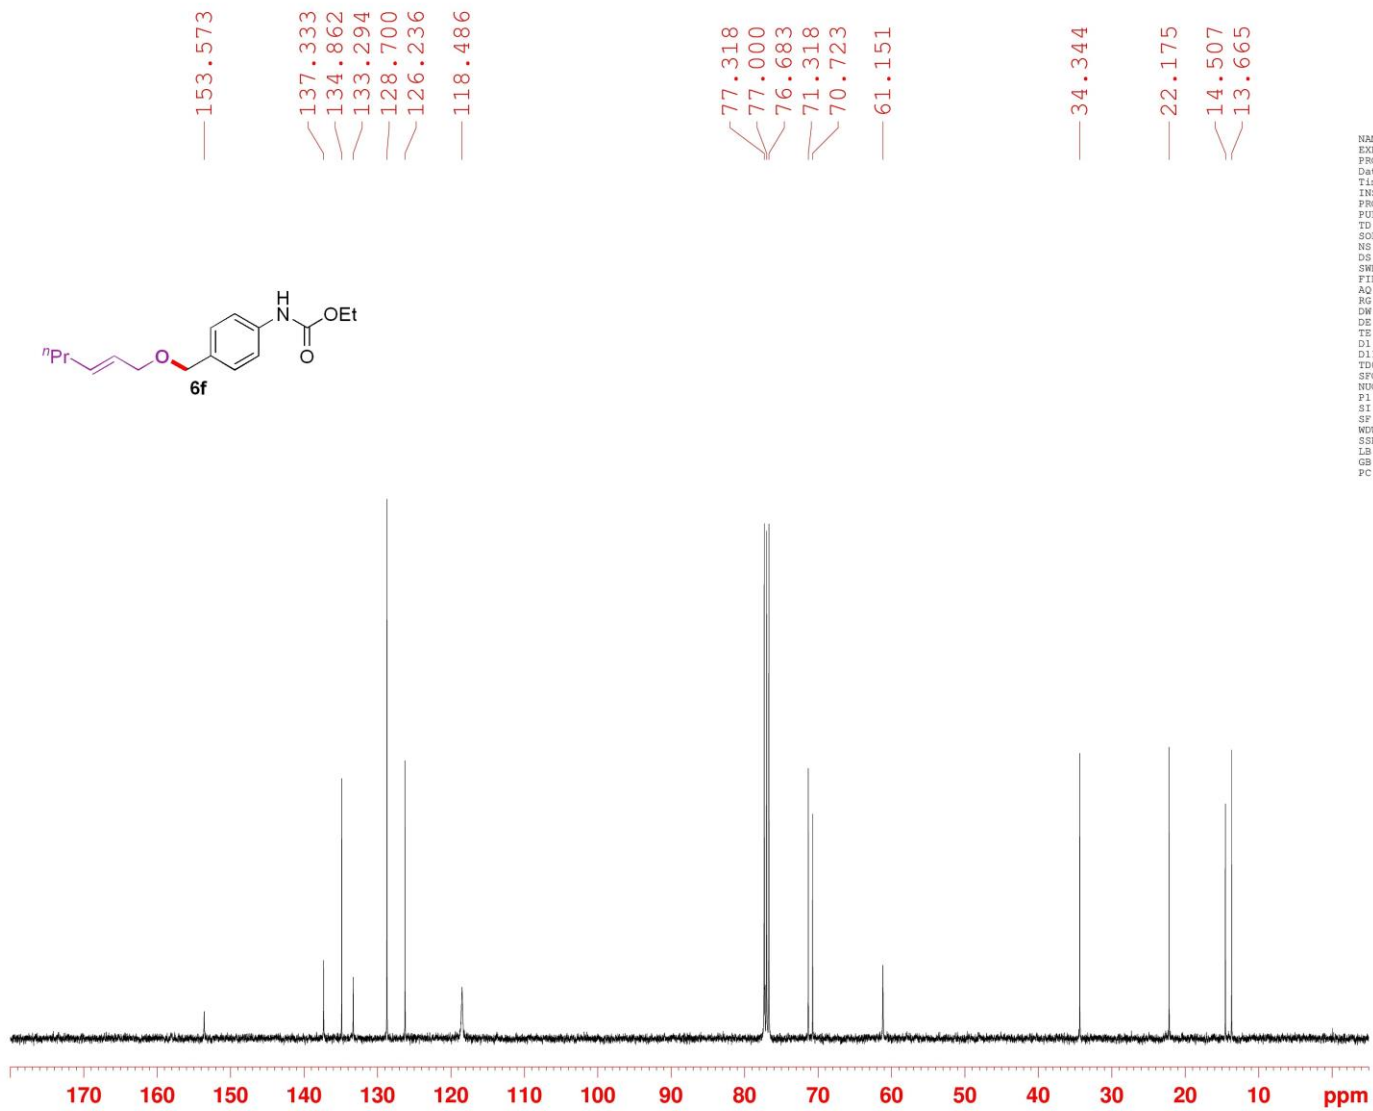

```

NAME      2019-11-25 shaohong-S2116
EXPNO    1
PROCNO   1
Date_    20191125
Time     17.12 h
INSTRUM  spect
PROBHD   z116098_0673 (
PULPROG  zgpg30
TD        65536
SOLVENT  CDCl3
NS        256
DS        4
SHE      24038.461 Hz
FIDRES   0.733596 Hz
AQ        1.3631988 sec
RG        203.48
DW        20.800 usec
DE        6.50 usec
TE        299.5 K
D1        2.0000000 sec
D11       0.0300000 sec
TDO       1
SFO1     100.6228298 MHz
NUC1      13C
P1        10.00 usec
SI        32768
SF        100.6127753 MHz
WDW       EM
SSB       0
LB        1.00 Hz
GB        0
PC        1.40
  
```

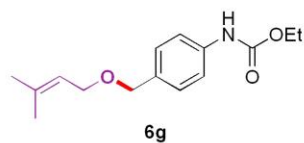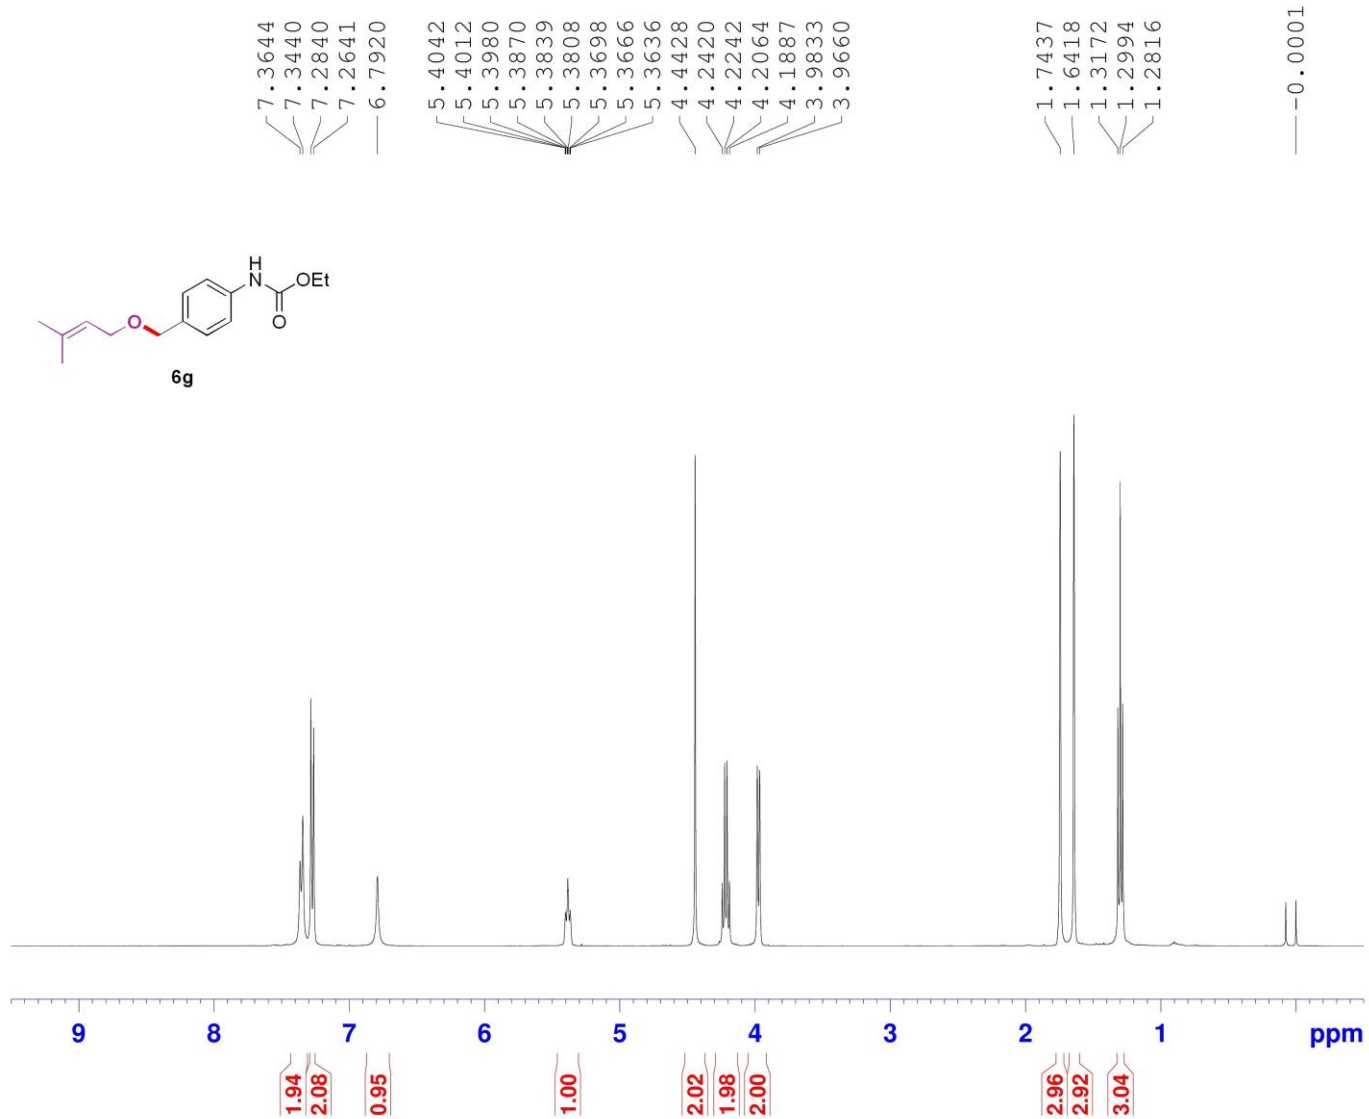

```

NAME      2019-11-14 shaozhong-S2114
EXPNO    1
PROCNO   1
Date_    20191115
Time     0.30 h
INSTRUM  spect
PROBHD   zg30
PULPROG  zg30
TD       65536
SOLVENT  CDCl3
NS       16
DS       2
SWH      8012.820 Hz
FIDRES   0.244532 Hz
AQ       4.0894966 sec
RG       31.12
DW       62.400 usec
DE       6.50 usec
TE       296.1 K
D1       1.00000000 sec
TDO      1
SFO1     400.1324708 MHz
NUC1     1H
P1       10.00 usec
S1       65536
SF       400.1300078 MHz
WOM      EM
SBB      0
LB       0.30 Hz
GB       0
PC       1.00
  
```



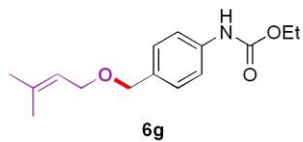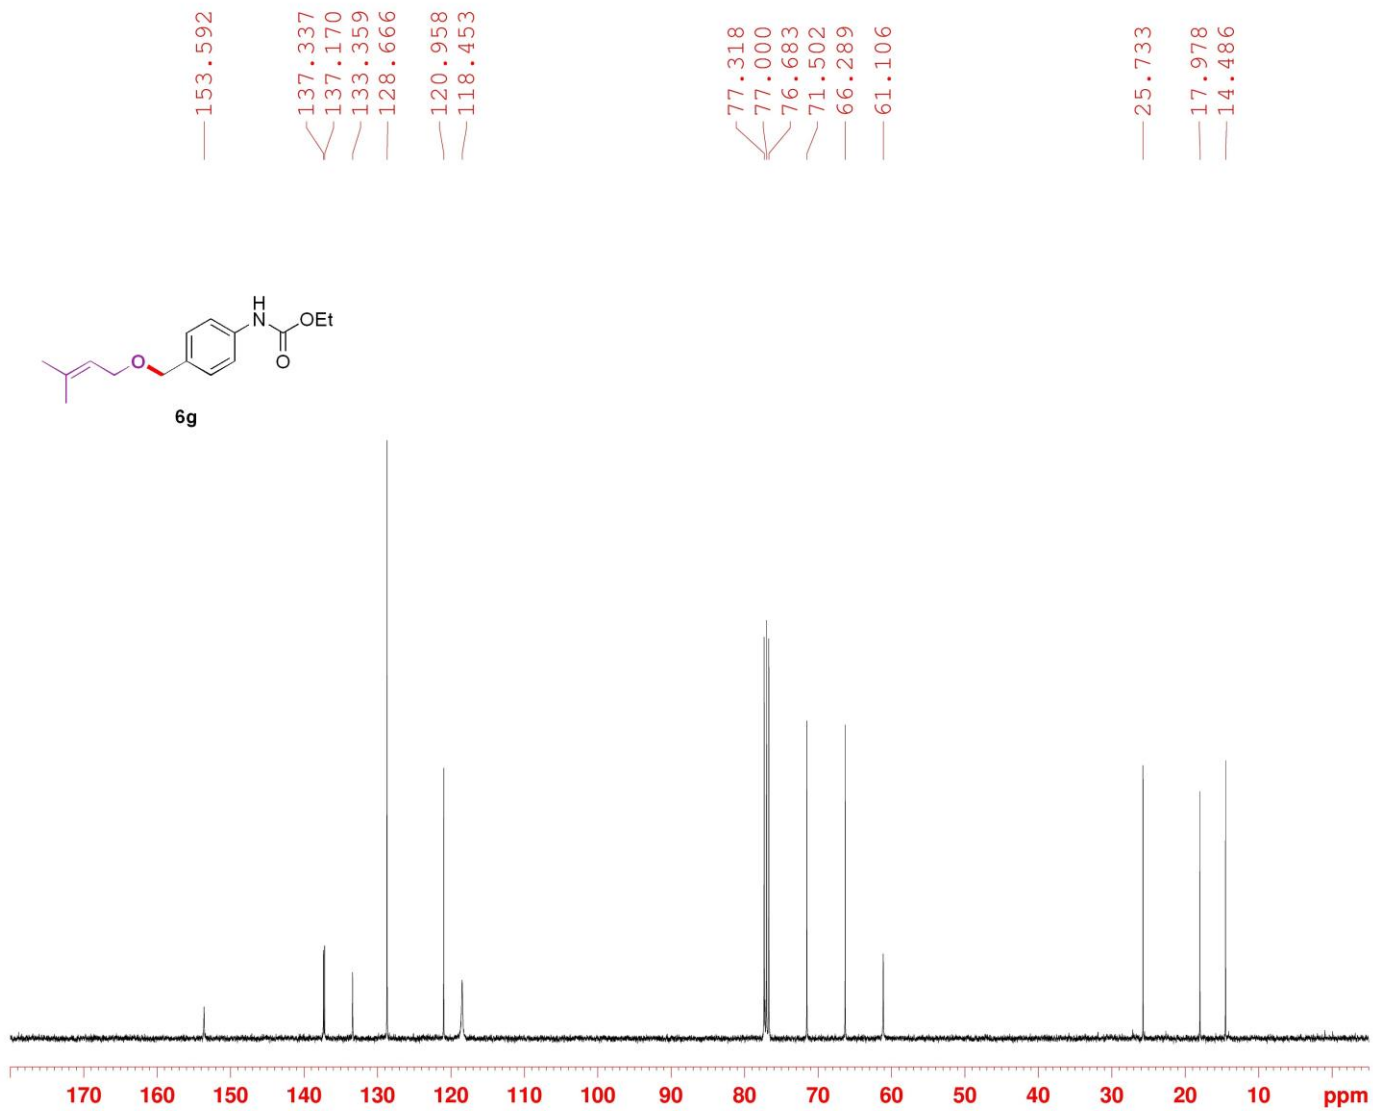

```

NAME      2019-11-14 shaozhong-S2114
EXPNO     2
PROCNO    1
Date_     20191115
Time      0.45 h
INSTRUM   spect
PROBHD    E116098_0673 (
PULPROG   zgpg30
TD         65536
SOLVENT   CDCl3
NS         256
DS         4
SWH        26041.666 Hz
FIDRES     0.7947229 Hz
AQ         1.2583412 sec
RG         203.48
DW         19.200 usec
DE         6.50 usec
TE         295.4 K
D1         2.0000000 sec
D11        0.0300000 sec
TDO        1
SFO1       100.6228298 MHz
NUC1       13C
P1         10.00 usec
SI         32768
SF         100.6127773 MHz
WDW        EM
SSB        0
LB         1.00 Hz
GB         0
PC         1.40
  
```

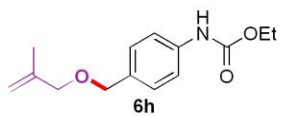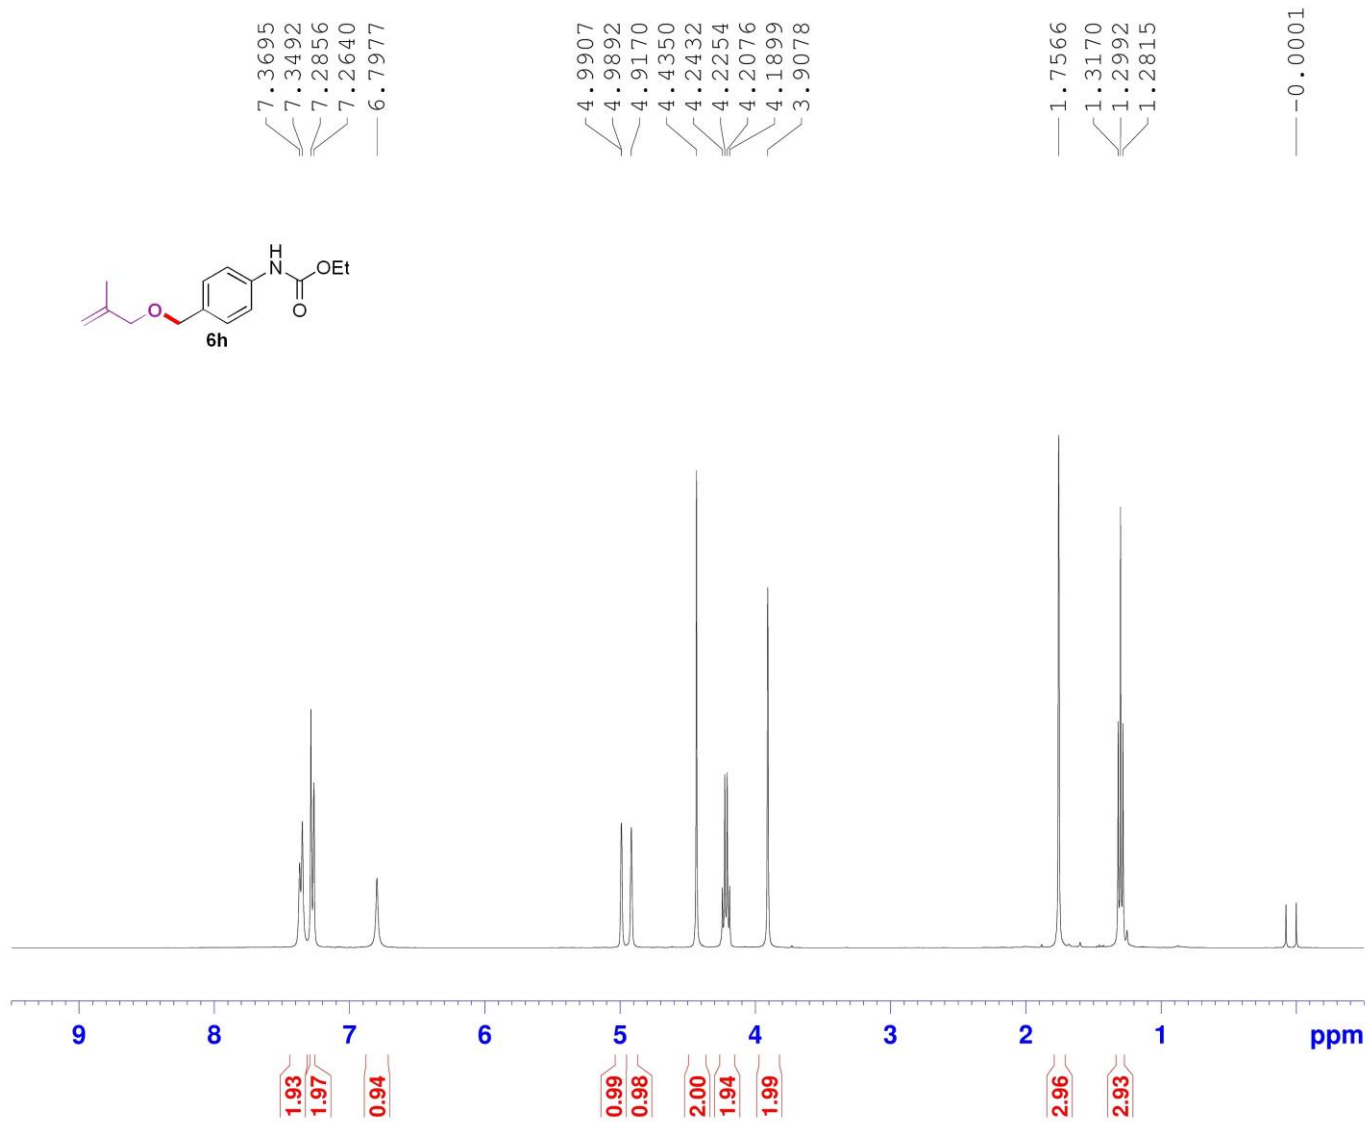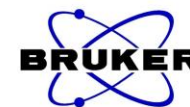

```

NAME      2019-11-14 shaozhong-S2110
EXPNO    1
PROCNO   1
Date_    20191114
Time     23.12 h
INSTRUM  spect
PROBHD   zg30
PULPROG  zg30
TD        65536
SOLVENT  CDCl3
NS        16
DS        2
SWH       8012.820 Hz
FIDRES    0.244532 Hz
AQ         4.0894966 sec
RG         31.12
DW         62.400 usec
DE         6.50 usec
TE         295.6 K
D1         1.00000000 sec
TDO        1
SFO1      400.1324708 MHz
NUC1       1H
P1         10.00 usec
S1         65536
SF         400.1300090 MHz
WOM        EM
SBB         0
LB         0.30 Hz
GB         0
PC         1.00
  
```

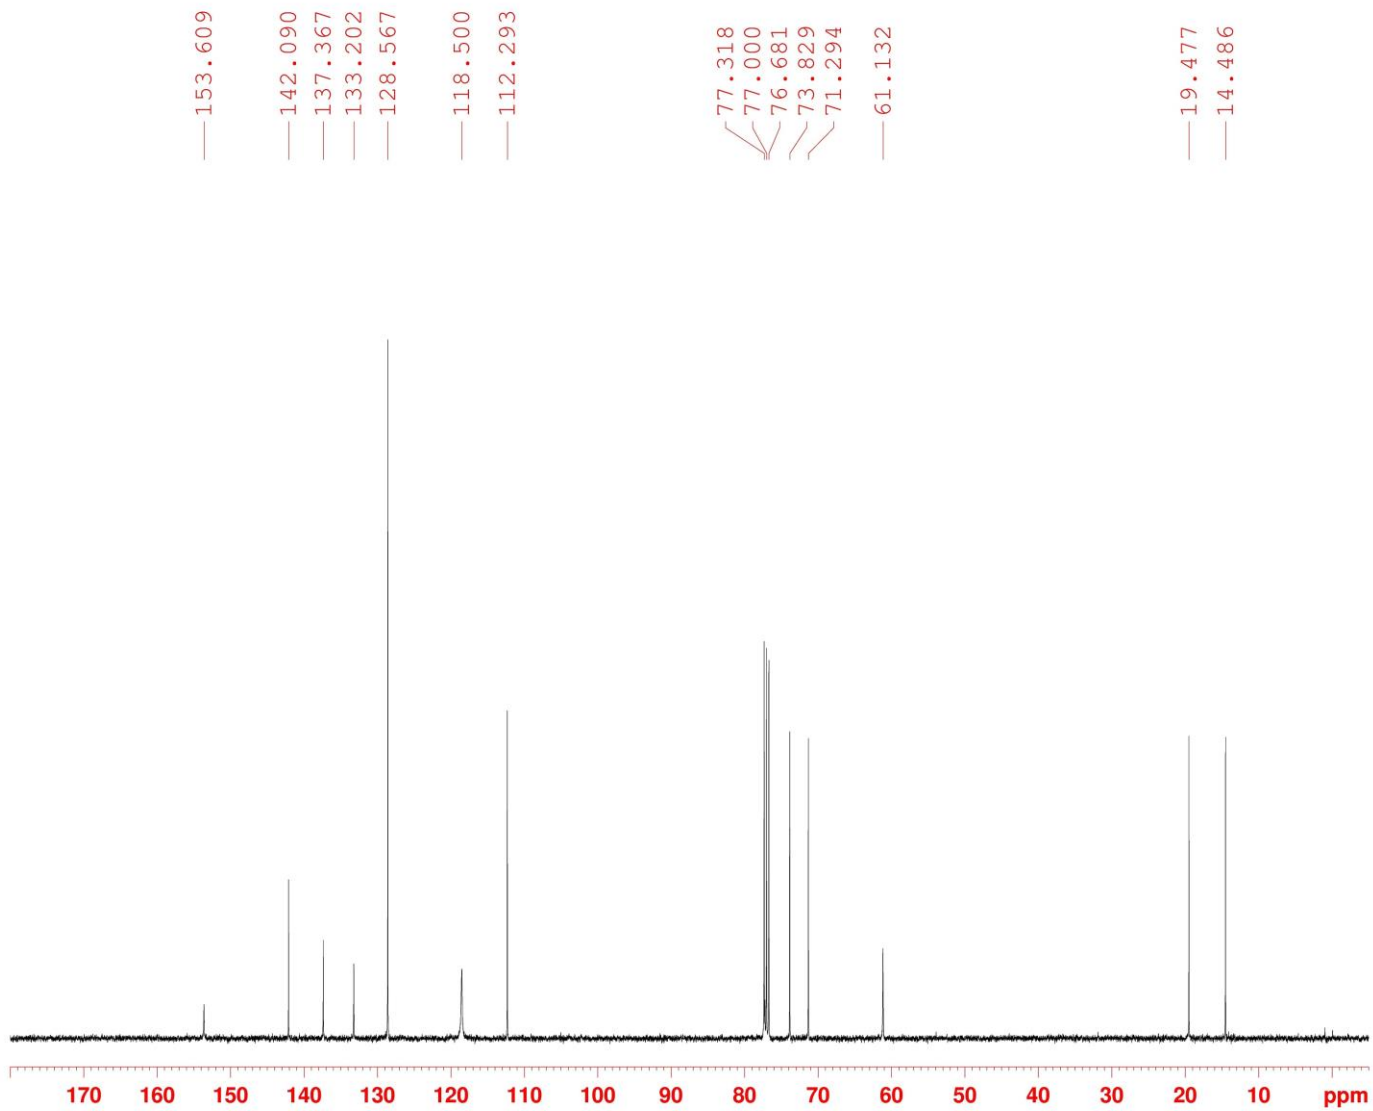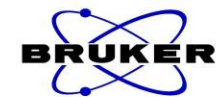

```

NAME      2019-11-14 shaohong-S2110
EXPNO     2
PROCNO    1
Date_     20191114
Time      23.27 h
INSTRUM   spect
PROBHD    E116098_0673 (
PULPROG   zgpg30
TD         65536
SOLVENT   CDCl3
NS         256
DS         4
SWH        26041.666 Hz
FIDRES     0.7947229 Hz
AQ         1.2583412 sec
RG         203.48
DW         19.200 usec
DE         6.50 usec
TE         296.3 K
D1         2.0000000 sec
D11        0.03000000 sec
TDO        1
SFO1       100.6228298 MHz
NUC1       13c
P1         10.00 usec
SI         32768
SF         100.6127773 MHz
WDW        EM
SSB        0
LB         1.00 Hz
GB         0
PC         1.40
  
```

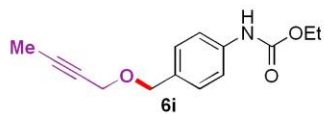

7.3726  
7.3522  
7.2907  
7.2722  
7.2699  
6.8796

4.5231  
4.2407  
4.2230  
4.2052  
4.1875  
4.1105  
4.1049  
4.0992  
4.0937

1.8736  
1.8679  
1.8622  
1.3148  
1.2970  
1.2792

0.0000

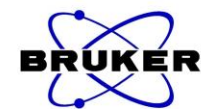

```

NAME      2019-11-12 yangdong-S2107
EXPNO     1
PROCNO    1
Date_     20191112
Time      10.56 h
INSTRUM   spect
PROBHD    Z116098_0673 (
PULPROG   zg30
TD         65536
SOLVENT   CDCl3
NS         16
DS         2
SWH        8012.820 Hz
FIDRES     0.244532 Hz
AQ          4.0894966 sec
RG          51.12
DW          62.400 usec
DE          6.50 usec
TE          295.6 K
D1          1.00000000 sec
TDO        1
SFO1       400.1324708 MHz
NUC1        1H
P1          10.00 usec
SI          65536
SF          400.1300045 MHz
WDW         EM
SSB         0
LB          0.30 Hz
GB          0
PC          1.00
  
```

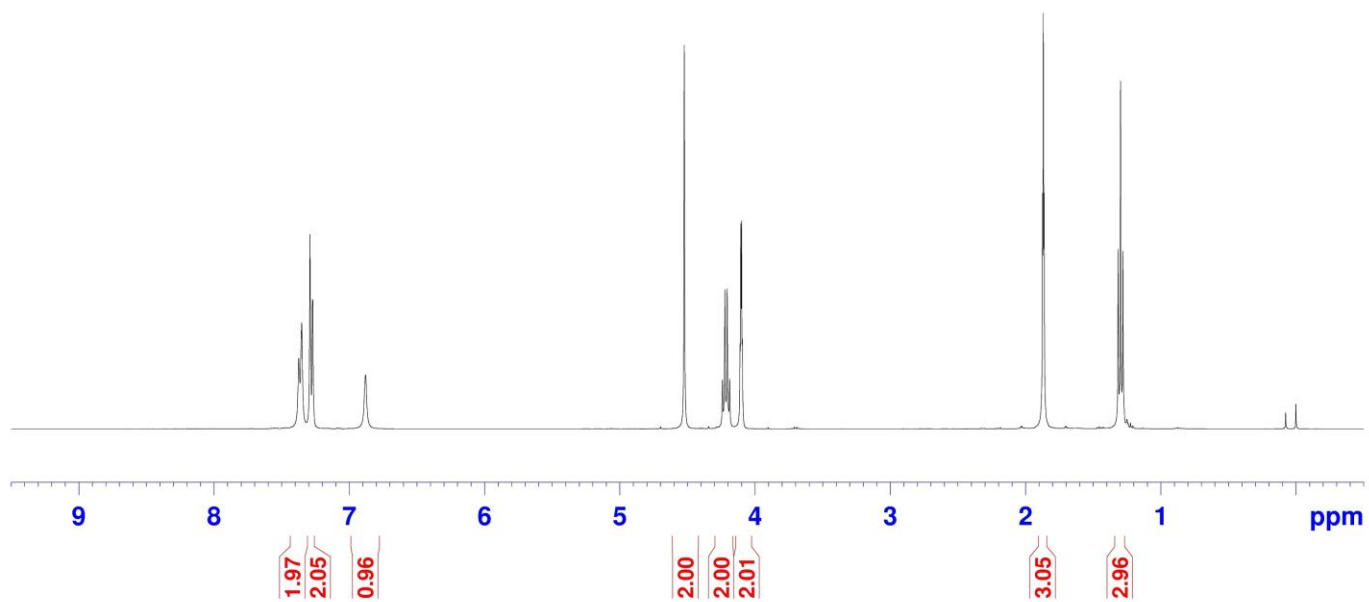

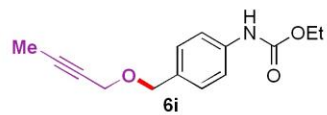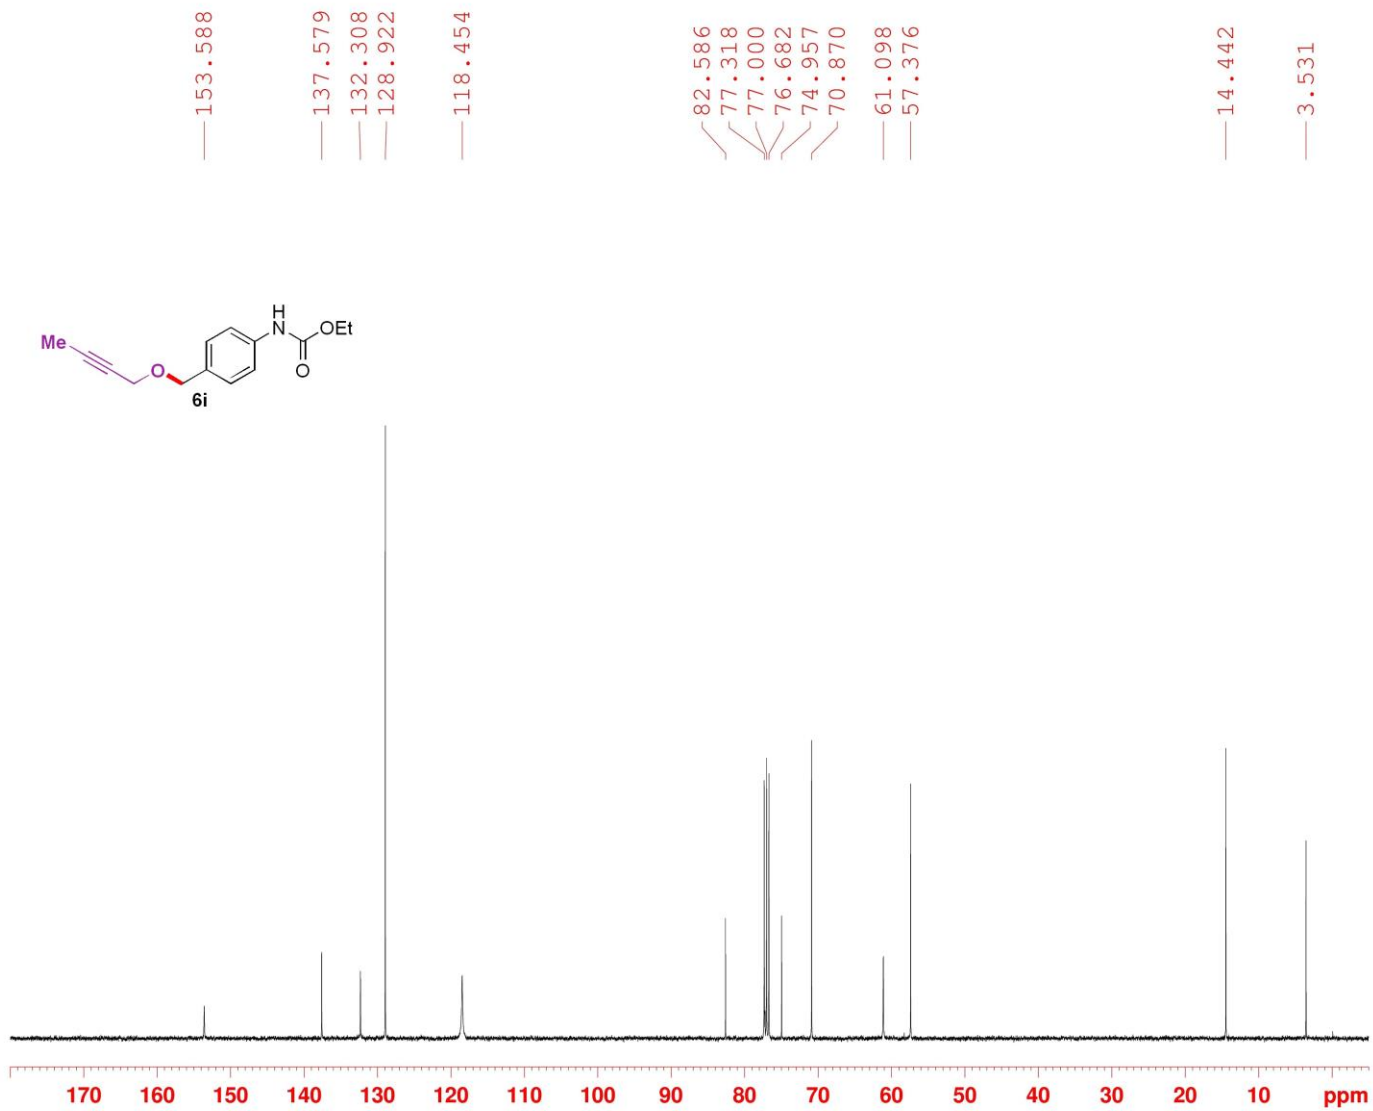

```

NAME      2019-11-12 yangdong-S2107
EXPNO    2
PROCNO   1
Date_    20191112
Time     11.11 h
INSTRUM  spect
PROBHD   Z116098_0673 (
PULPROG  zgpg30
TD       65536
SOLVENT  CDCl3
NS       256
DS       4
SWH      24038.461 Hz
FIDRES   0.733596 Hz
AQ       1.3631988 sec
RG       203.48
DW       20.800 usec
DE       6.50 usec
TE       296.0 K
D1       2.00000000 sec
D11      0.03000000 sec
TD0      1
SFO1     100.6228298 MHz
NUC1     13C
P1       10.00 usec
SI       32768
SF       100.6127802 MHz
WDW      EM
SSB      0
LB       1.00 Hz
GB       0
PC       1.40
  
```

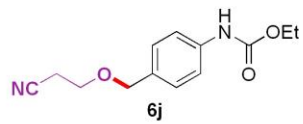

7.3920  
7.3715  
7.2870  
7.2684  
— 6.7691

4.5201  
4.2495  
4.2318  
4.2140  
4.1963  
3.6696  
3.6537  
3.6378

2.6231  
2.6072  
2.5913

1.3259  
1.3082  
1.2904

— 0.0000

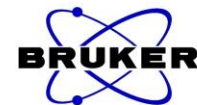

```

NAME      2019-11-11 shaozhong-S2104
EXPNO     1
PROCNO    1
Date_     20191111
Time      21.39 h
INSTRUM   spect
PROBHD    z116098_0673 (
PULPROG   zg30
TD         65536
SOLVENT   CDCl3
NS         16
DS         2
SWH        8012.820 Hz
FIDRES     0.244532 Hz
AQ         4.0894966 sec
RG         31.12
DW         62.400 usec
DE         6.50 usec
TE         295.6 K
D1         1.00000000 sec
TDO        1
SFO1       400.1324708 MHz
NUC1       1H
P1         10.00 usec
S1         65536
SF         400.1300062 MHz
WOM        EM
SBB         0
LB         0.30 Hz
GB         0
PC         1.00
  
```

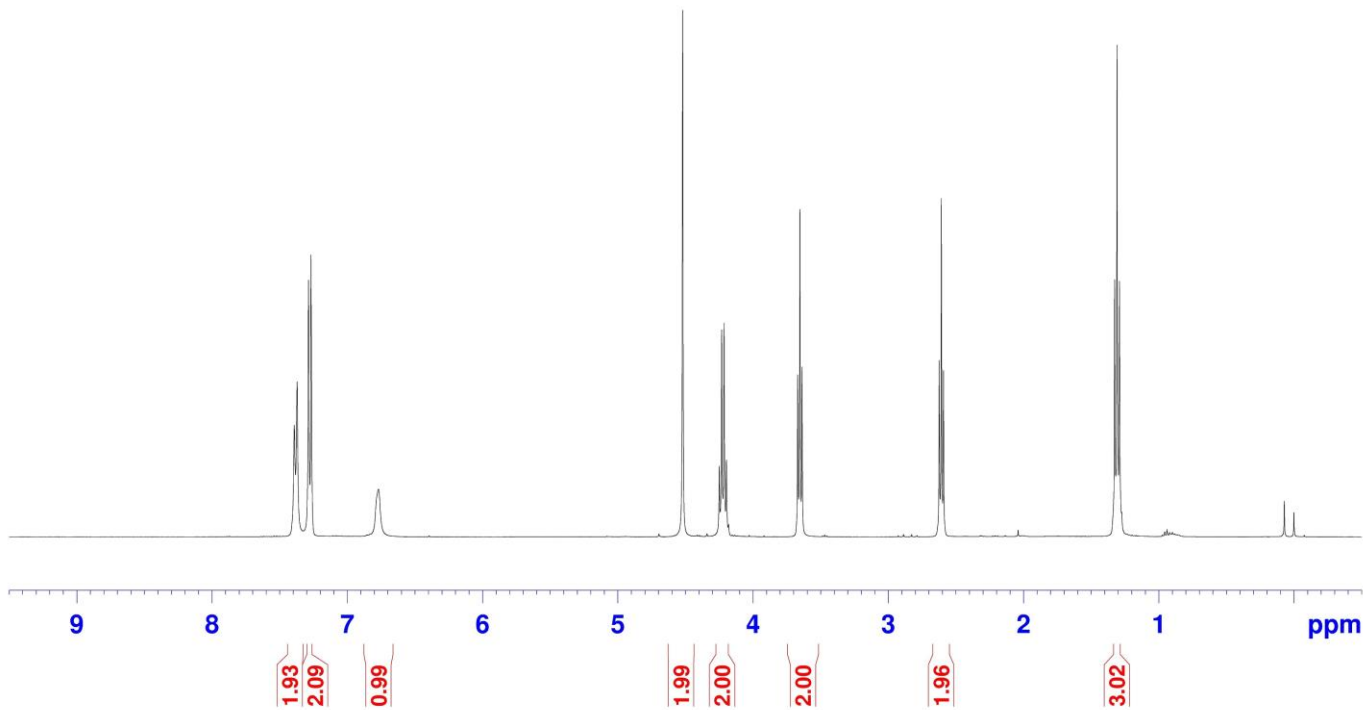

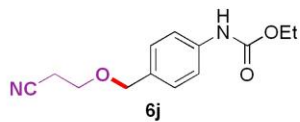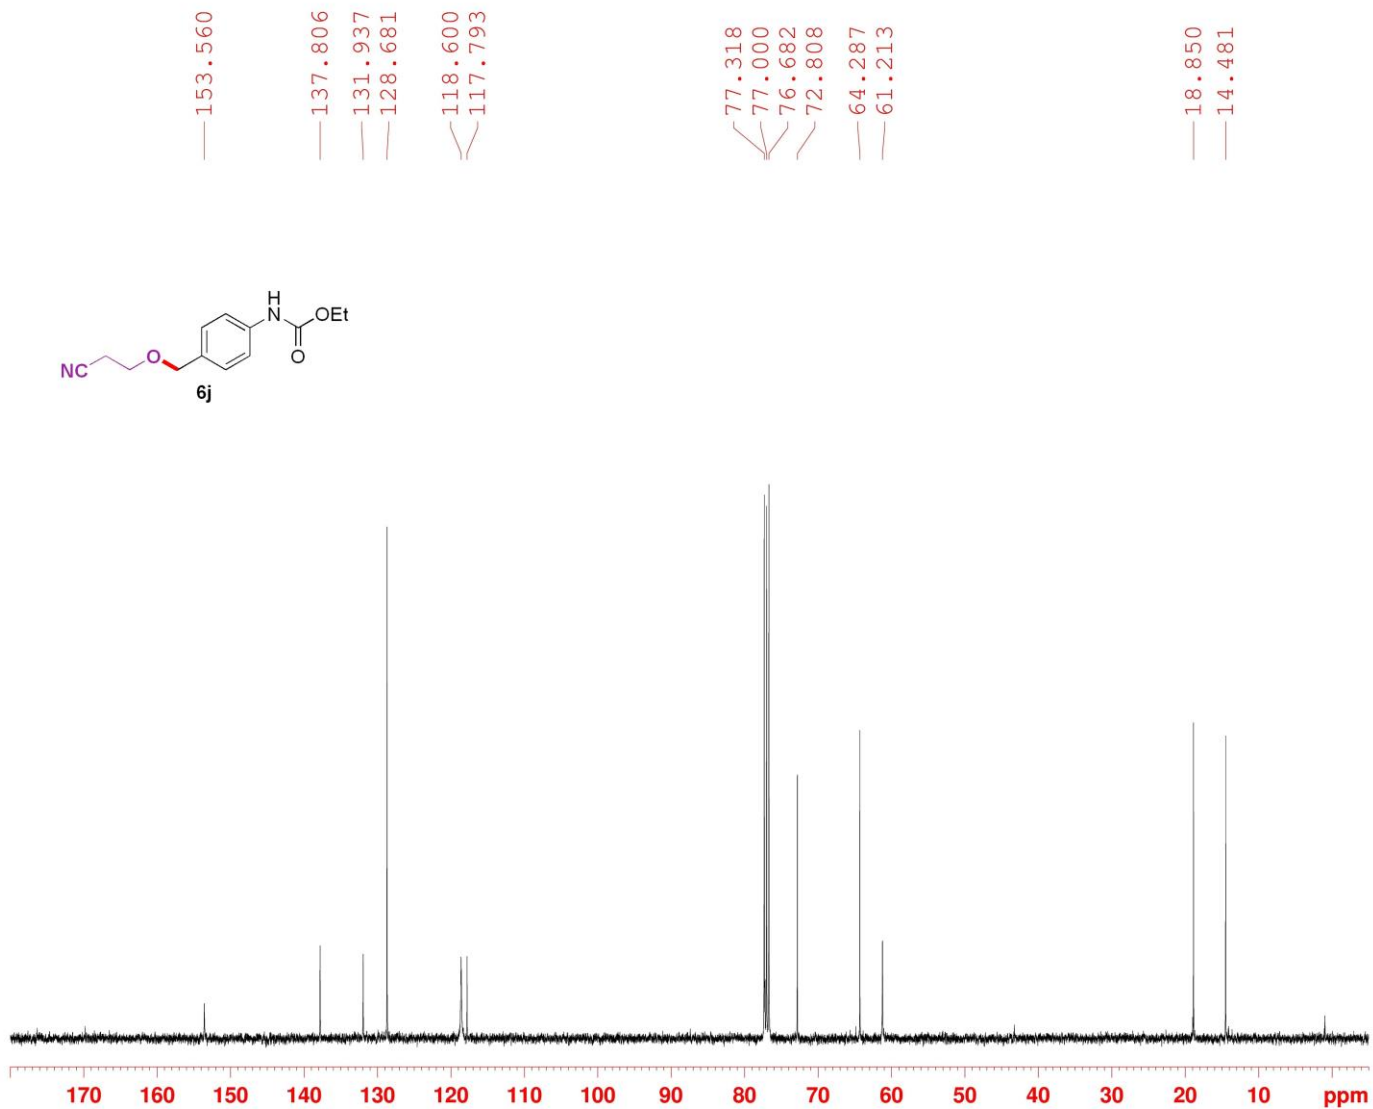

```

NAME      2019-11-11 shaozhong-S2104
EXPNO     2
PROCNO    1
Date_     20191111
Time      21.55 h
INSTRUM   spect
PROBHD    E116098_0673 (
PULPROG   zgpg30
TD         65536
SOLVENT   CDCl3
NS         256
DS         4
SWH        24038.461 Hz
FIDRES     0.733596 Hz
AQ         1.3631988 sec
RG         203.48
DW         20.800 usec
DE         6.50 usec
TE         296.3 K
D1         2.0000000 sec
D11        0.0300000 sec
TDO        1
SFO1       100.6228298 MHz
NUC1       13C
P1         10.00 usec
SI         32768
SF         100.6127769 MHz
WDW        EM
SSB        0
LB         1.00 Hz
GB         0
PC         1.40
  
```

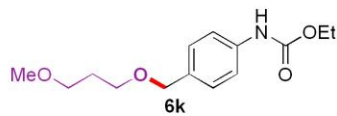

7.3681  
7.3480  
7.2755  
7.2613  
7.2403  
7.0107

4.4419  
4.2367  
4.2190  
4.2013  
4.1835  
3.5468  
3.5309  
3.5149  
3.4917  
3.4758  
3.4599  
3.3226  
1.9044  
1.8885  
1.8726  
1.8567  
1.8407  
1.3119  
1.2941  
1.2763

0.0000

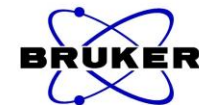

```

NAME      2019-11-11 shaozhong-S2105
EXPNO     1
PROCNO    1
Date_     20191111
Time      22.00 h
INSTRUM   spect
PROBHD    zg30
PULPROG   zg30
TD         65536
SOLVENT   CDCl3
NS         16
DS         2
SWH        8012.820 Hz
FIDRES     0.244532 Hz
AQ         4.0894966 sec
RG         22.71
DW         62.400 usec
DE         6.50 usec
TE         296.0 K
D1         1.00000000 sec
TDO        1
SFO1      400.1324708 MHz
NUC1       1H
P1         10.00 usec
S1         65536
SF         400.1300033 MHz
WOM        EM
SBB        0
LB         0.30 Hz
GB         0
PC         1.00
  
```

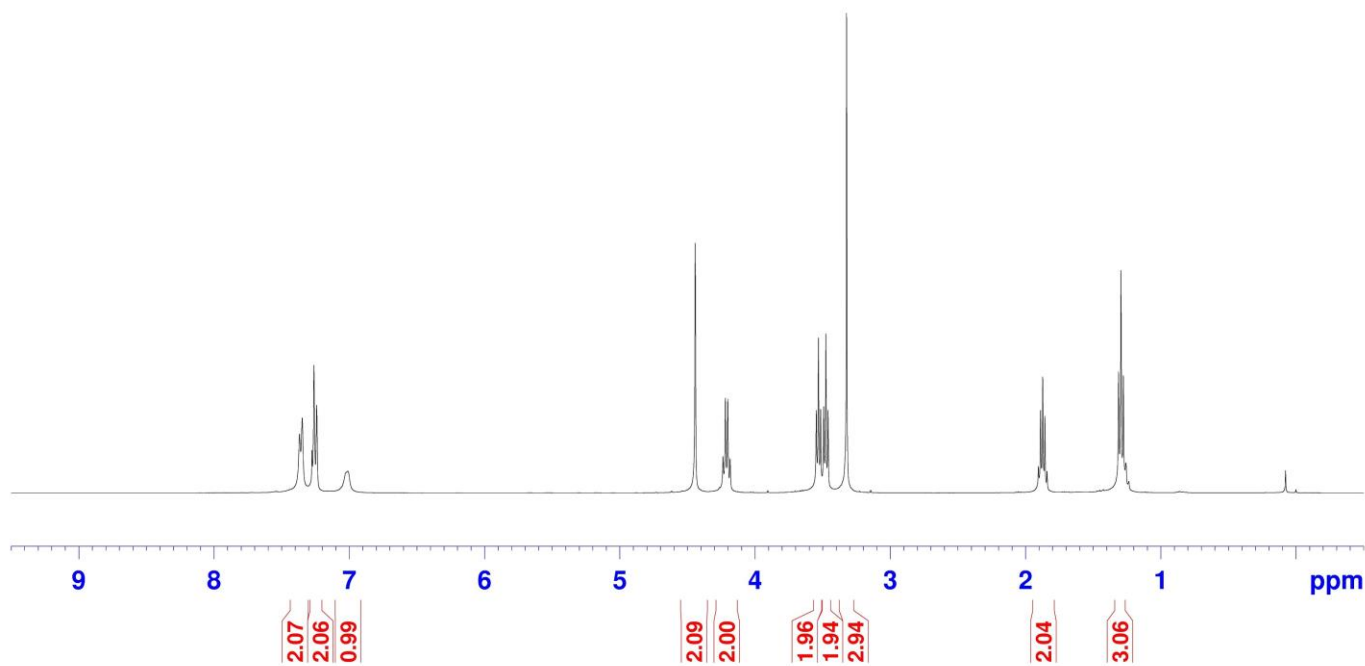



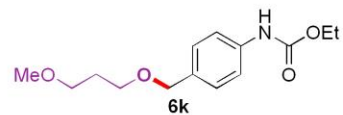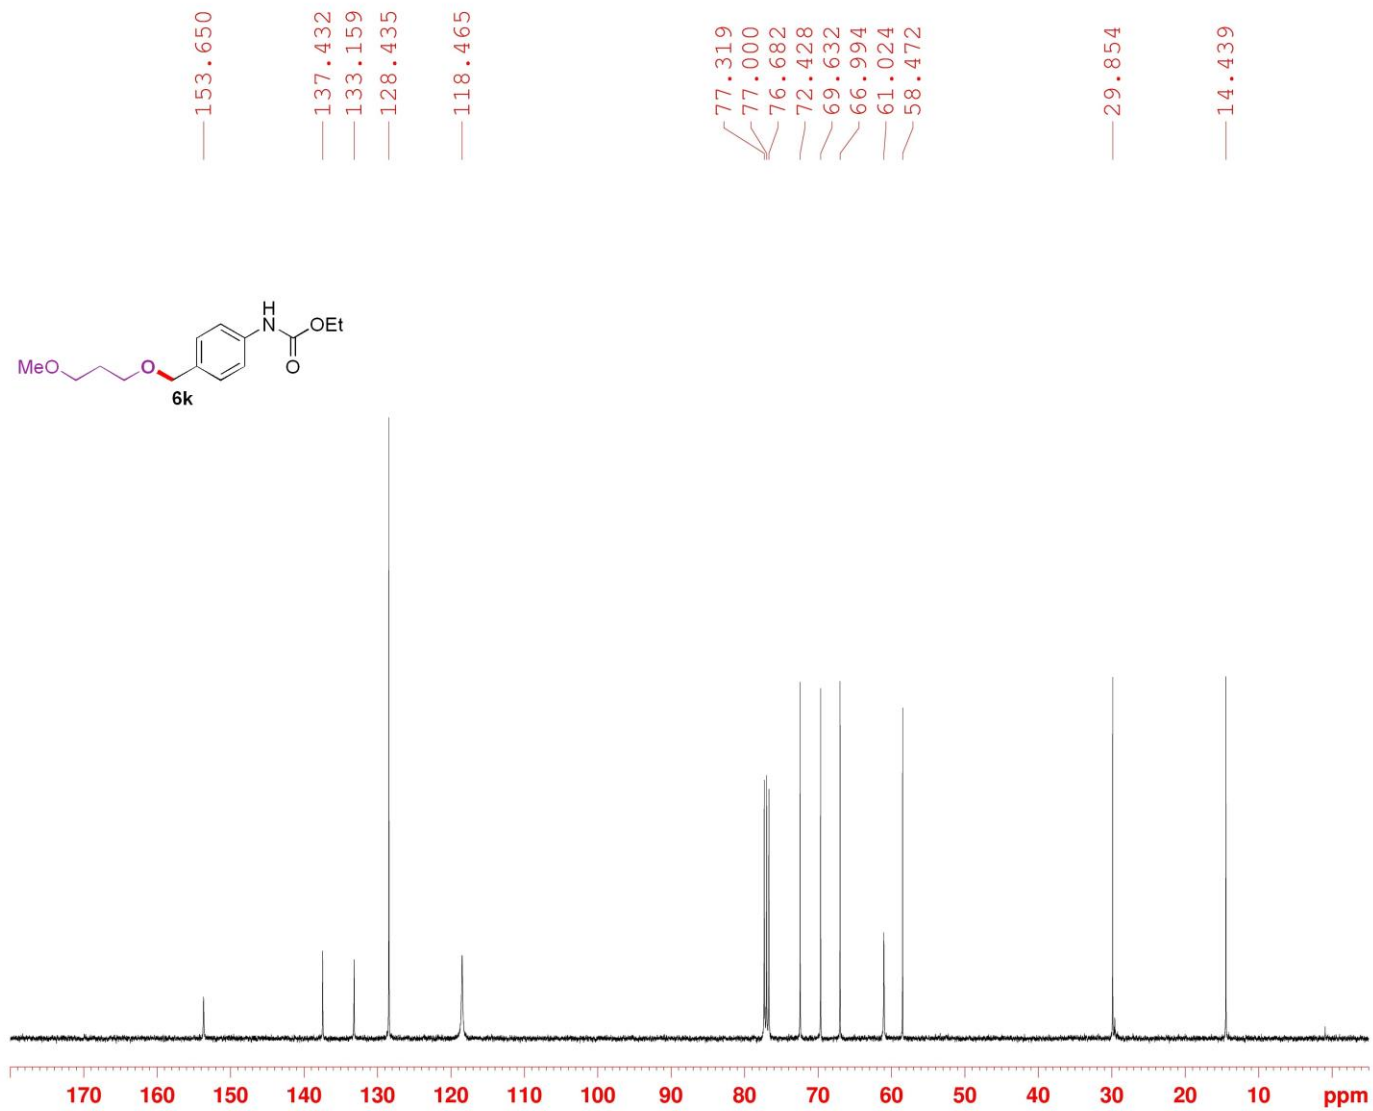

```

NAME      2019-11-11 shaozhong-S2105
EXPNO     2
PROCNO    1
Date_     20191111
Time      22.15 h
INSTRUM   spect
PROBHD    E116098_0673 (
PULPROG   zgpg30
TD         65536
SOLVENT   CDCl3
NS         256
DS         4
SWH        24038.461 Hz
FIDRES     0.733596 Hz
AQ         1.3631988 sec
RG         203.48
DW         20.800 usec
DE         6.50 usec
TE         295.4 K
D1         2.0000000 sec
D11        0.0300000 sec
TDO        1
SF01       100.6228298 MHz
NUC1       13C
P1         10.00 usec
SI         32768
SF         100.6127811 MHz
WDW        EM
SSB        0
LB         1.00 Hz
GB         0
PC         1.40
  
```

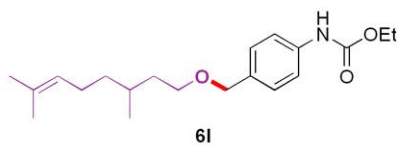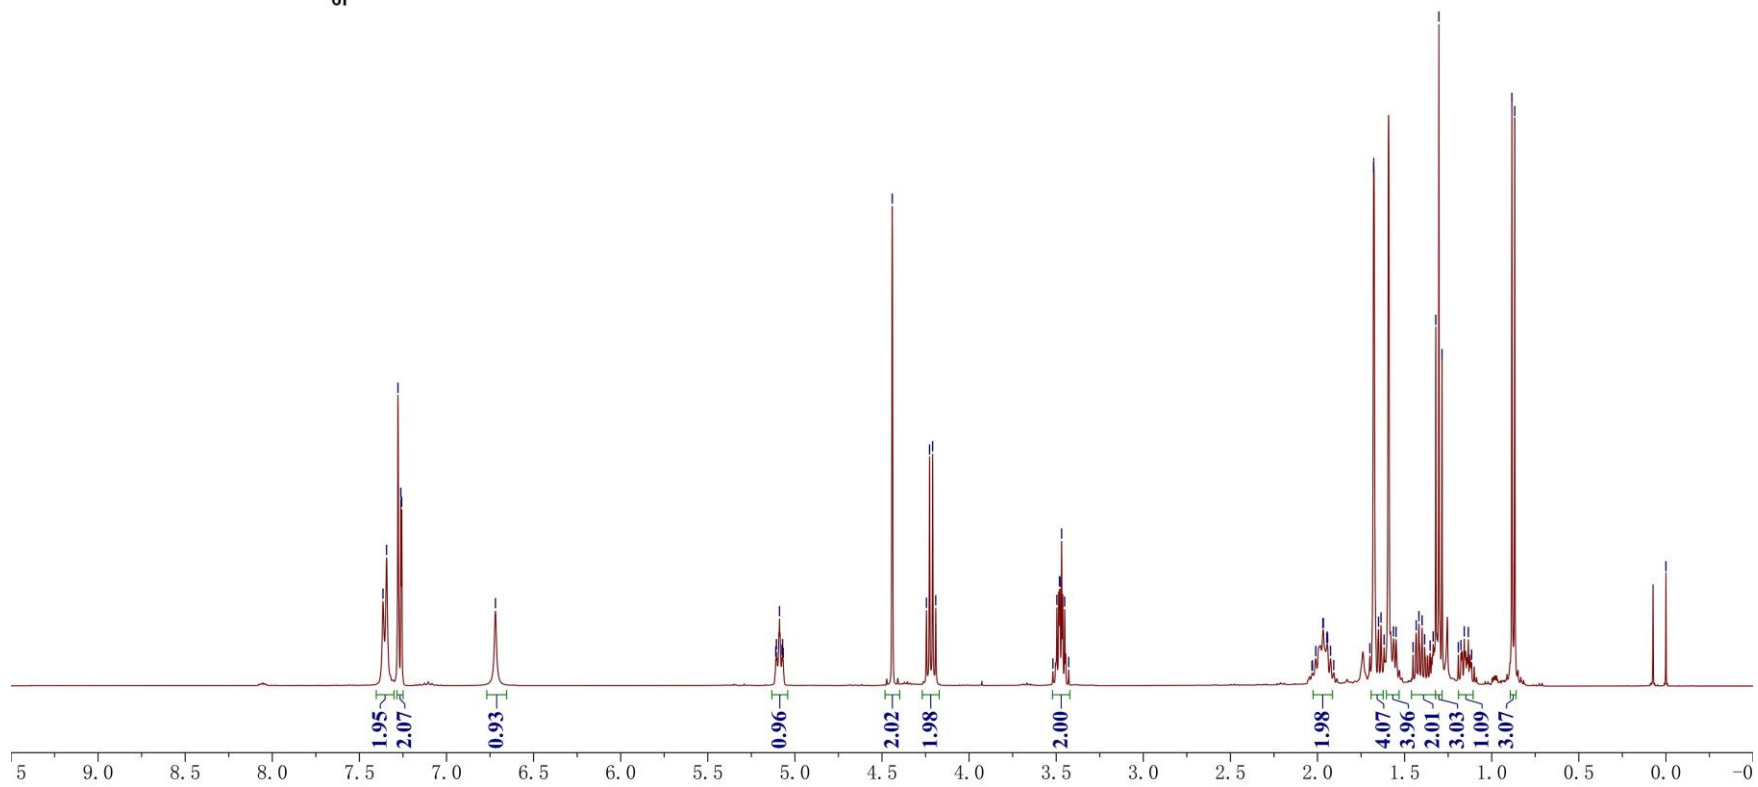

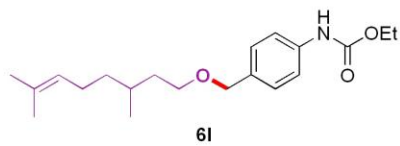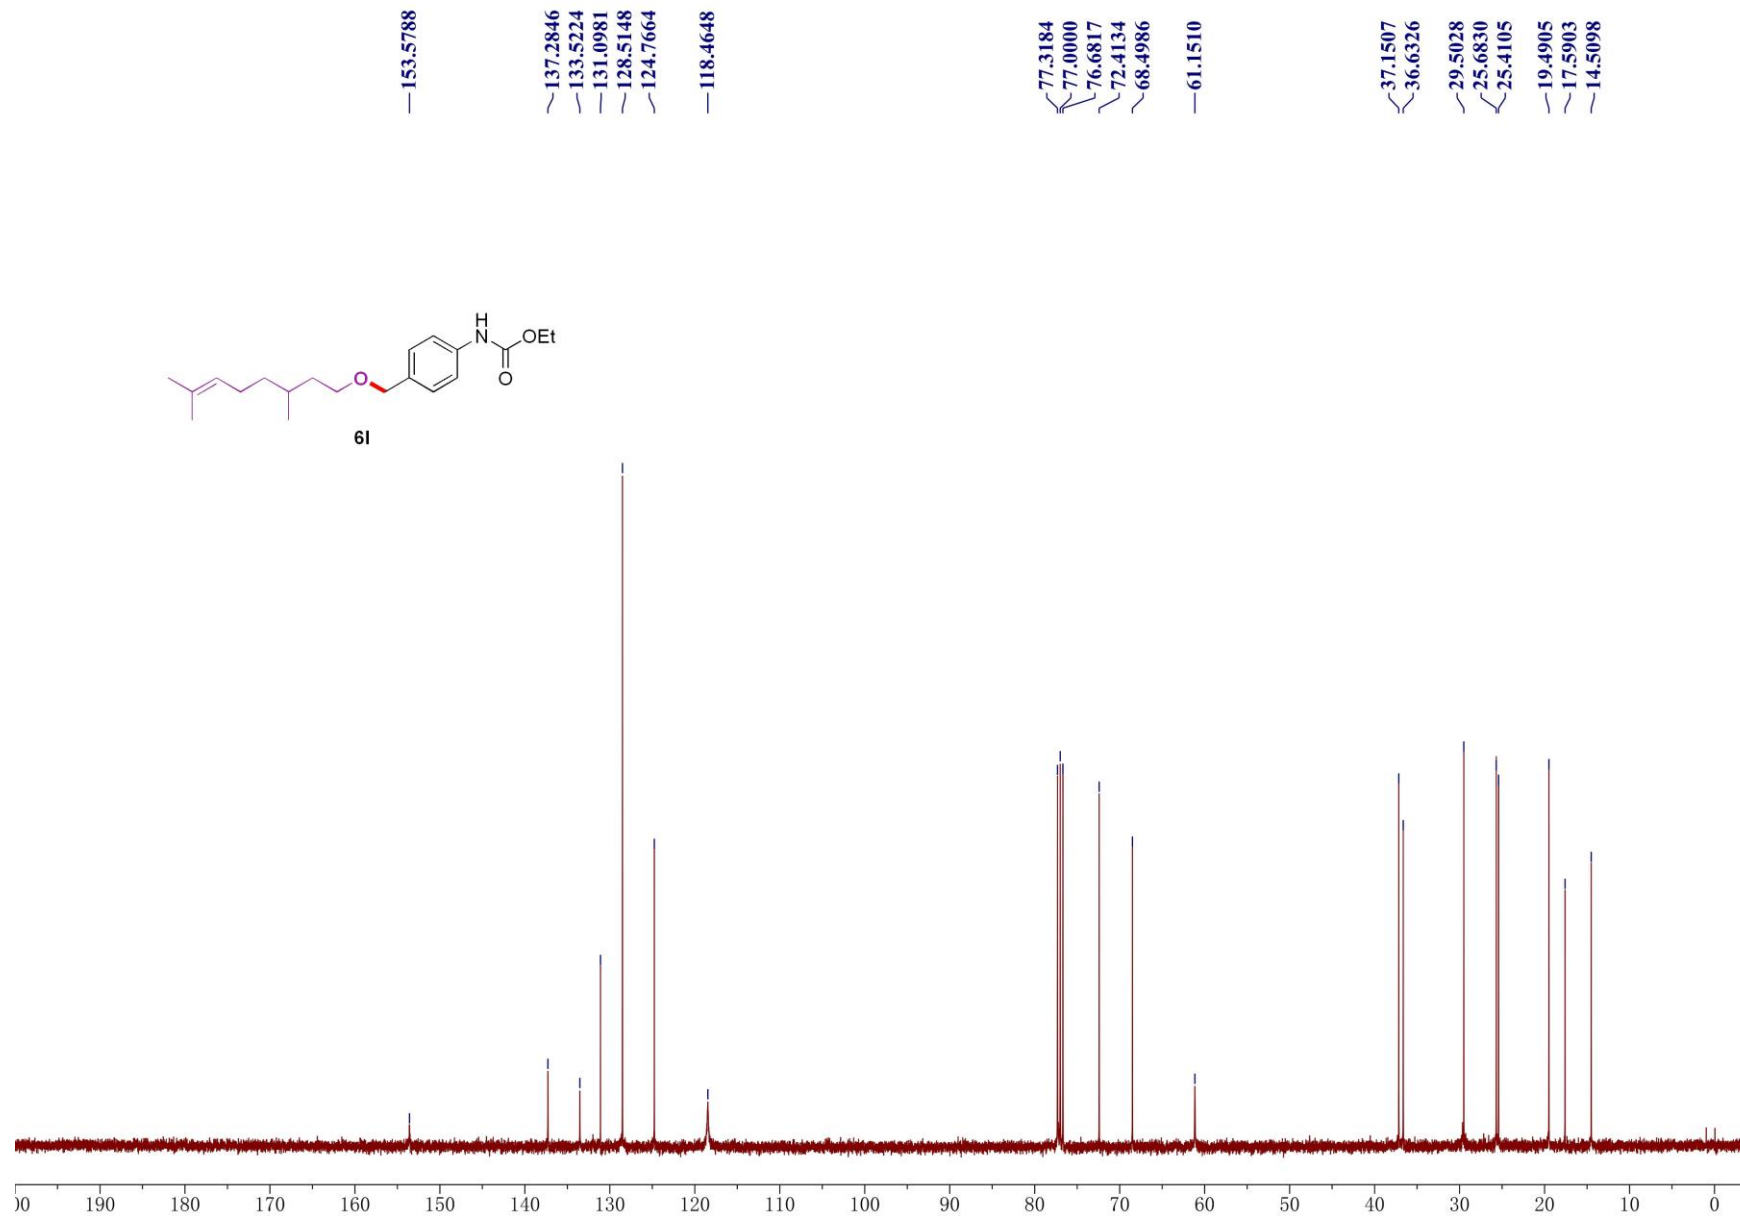

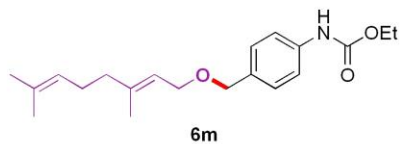

7.3646  
7.3443  
7.2887  
7.2675  
7.2625  
6.7324

5.4014  
5.3849  
5.3684  
5.1122  
5.0965  
5.0797  
4.4454  
4.2453  
4.2276  
4.2098  
4.1920  
4.0126  
3.9957

2.1153  
2.0957  
2.0799  
2.0553  
2.0362  
2.0199  
1.6750  
1.6341  
1.5987  
1.3211  
1.3034  
1.2856

0.0000

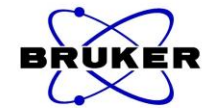

```

NAME      2019-11-18 shaozhong-S2118
EXPNO    1
PROCNO   1
Date_    20191119
Time     9.48 h
INSTRUM  spect
PROBHD   z116098_0673 (
PULPROG  zg30
TD       65536
SOLVENT  CDCl3
NS       16
DS       2
SWH      8012.820 Hz
FIDRES   0.244532 Hz
AQ       4.0894966 sec
RG       31.12
DW       62.400 usec
DE       6.50 usec
TE       296.8 K
D1       1.00000000 sec
TDO      1
SFO1     400.1324708 MHz
NUC1     1H
P1       10.00 usec
S1       65536
SF       400.1300088 MHz
WOM      EM
SBB      0
LB       0.30 Hz
GB       0
PC       1.00
  
```

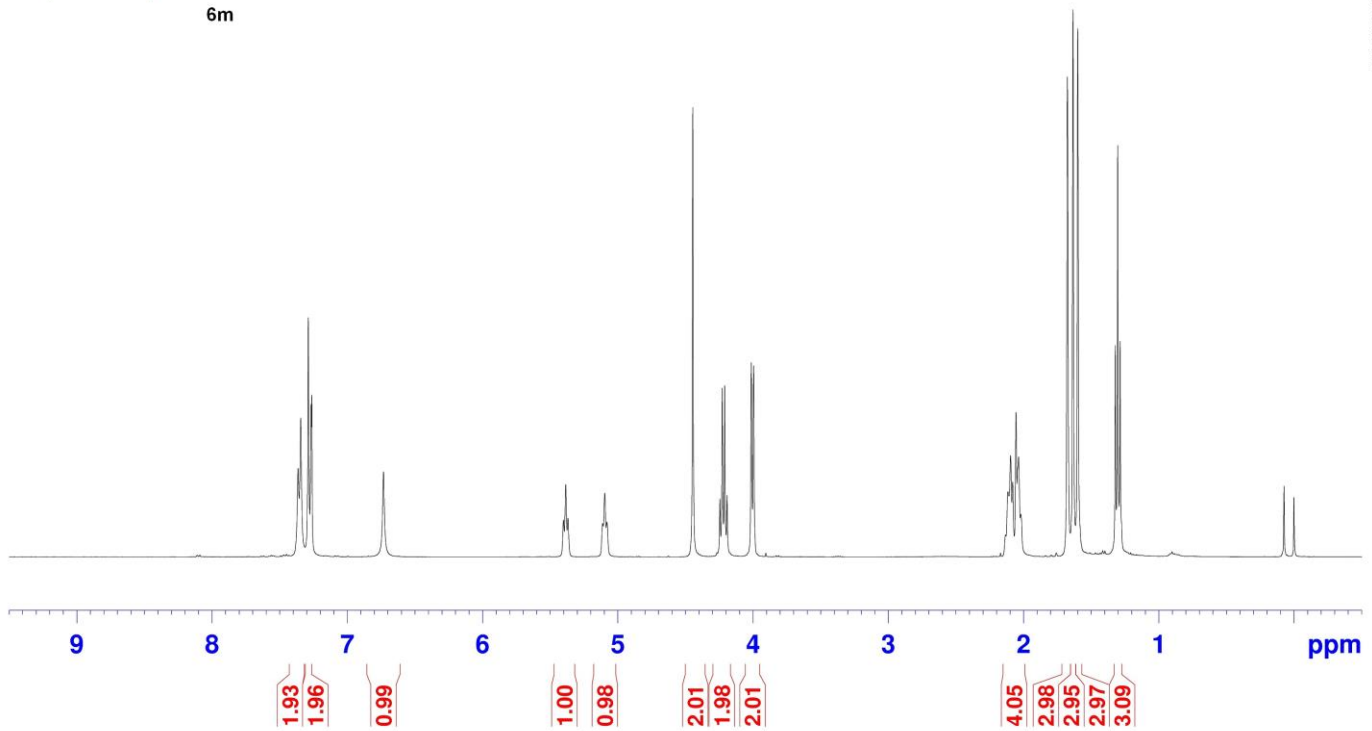

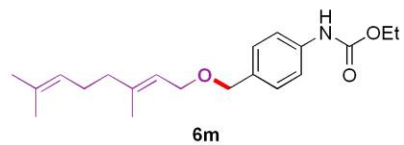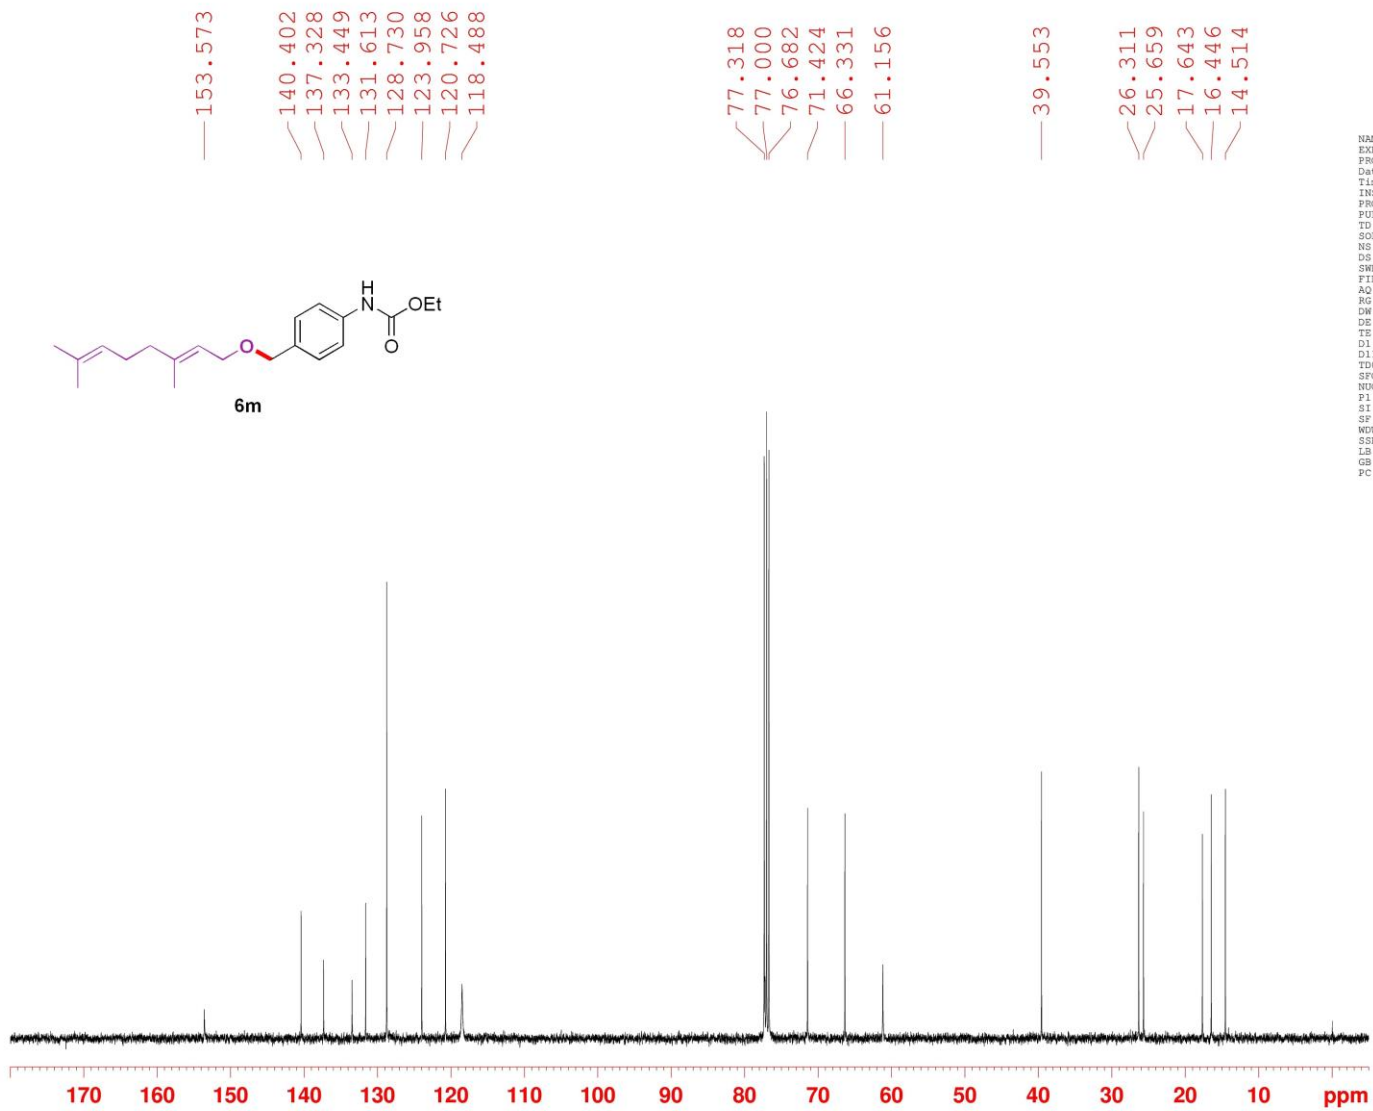

```

NAME      2019-11-25 shaohong-S2118
EXPNO    1
PROCNO    1
Date_    20191126
Time     3.44 h
INSTRUM   spect
PROBHD    E116098_0673 (
PULPROG   zgpg30
TD        65536
SOLVENT   CDCl3
NS        256
DS        4
SHE       24038.461 Hz
FIDRES    0.733596 Hz
AQ        1.3631988 sec
RG        203.48
DW        20.800 usec
DE        6.50 usec
TE        293.4 K
D1        2.00000000 sec
D11       0.03000000 sec
TDO       1
SFO1      100.6228298 MHz
NUC1      13C
P1        10.00 usec
SI        32768
SF        100.6127743 MHz
WDW       EM
SGB       0
LB        1.00 Hz
GB        0
PC        1.40
  
```

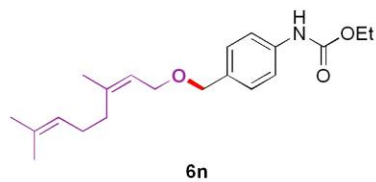

7.3583  
7.3379  
7.2859  
7.2625  
— 6.6529

5.4107  
5.3939  
5.3782  
5.0734  
4.4375  
4.2464  
4.2287  
4.2109  
4.1932  
3.9883  
3.9712

2.0543  
2.0470  
1.7510  
1.6696  
1.5818  
1.3237  
1.3059  
1.2881

— 0.0000

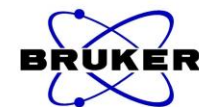

```

NAME      2019-11-18 shaozhong-SZ115
EXPNO     1
PROCNO    1
Date_     20191118
Time      18.34 h
INSTRUM   spect
PROBHD    z116098_0673 (
PULPROG   zg30
TD         65536
SOLVENT   CDCl3
NS         16
DS         2
SWH        8012.820 Hz
FIDRES     0.244532 Hz
AQ         4.0894966 sec
RG         31.12
DW         62.400 usec
DE         6.50 usec
TE         297.1 K
D1         1.00000000 sec
TDO        1
SFO1      400.1324708 MHz
NUC1       1H
P1         10.00 usec
S1         65536
SF         400.1300089 MHz
WOM        EM
SGB        0
LB         0.30 Hz
GB         0
PC         1.00
  
```

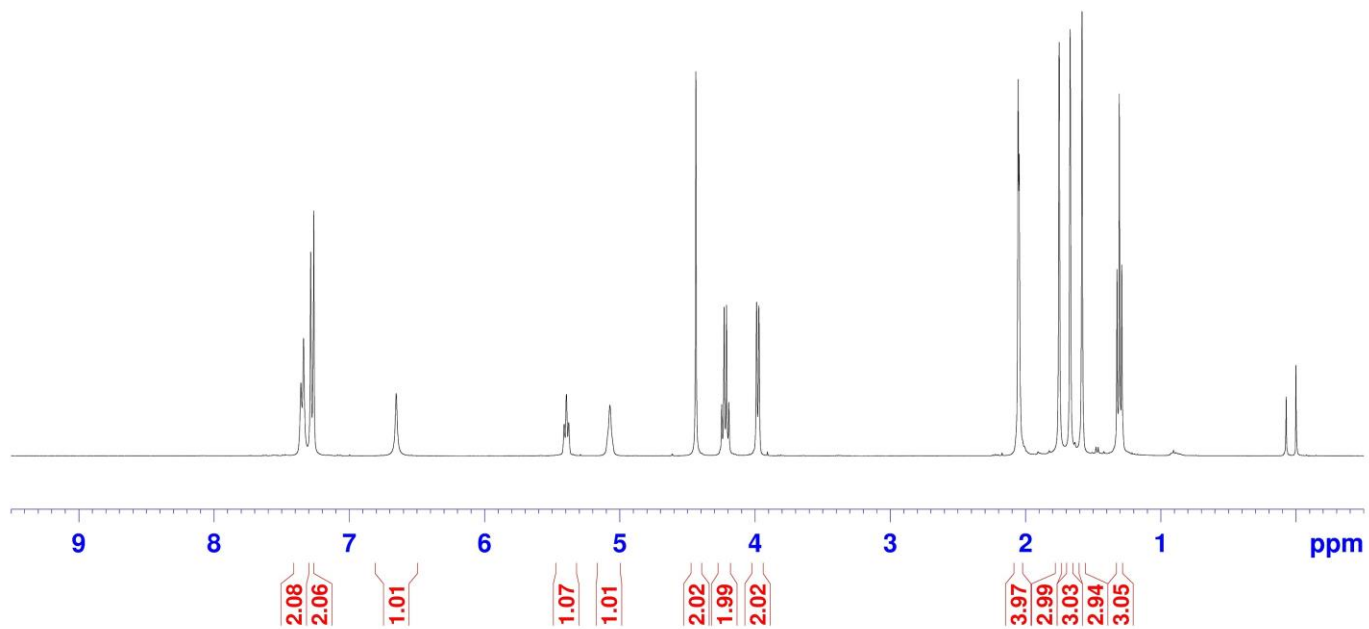

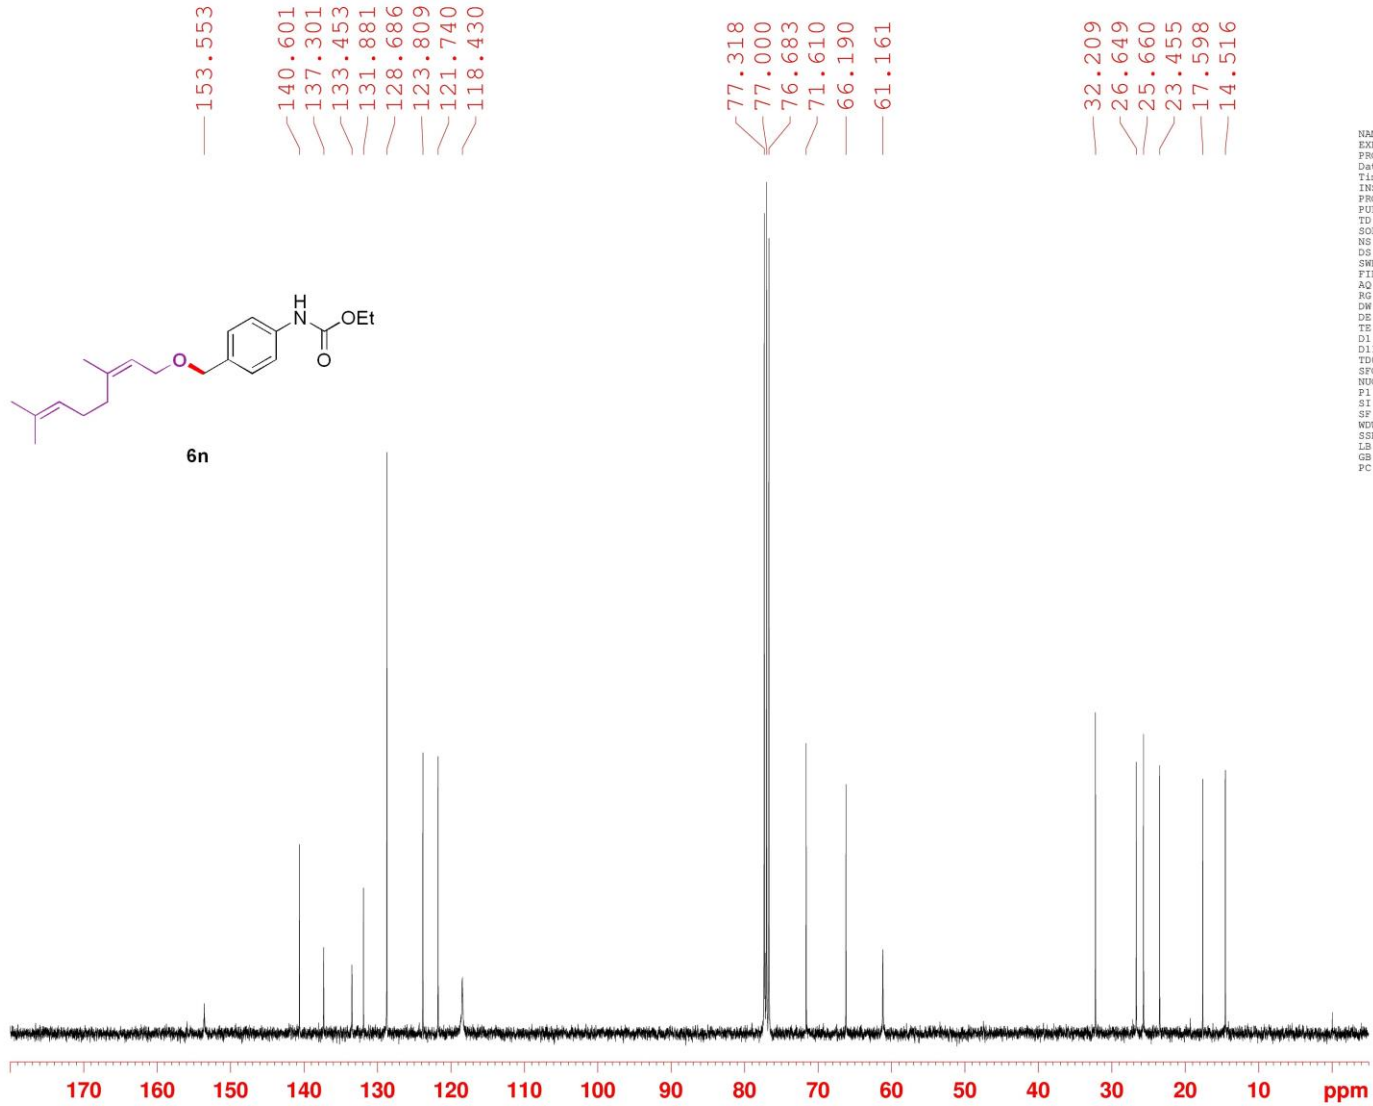

```

NAME      2019-11-25 shaohong-S2115
EXPNO    1
PROCNO   1
Date_    20191125
Time     11:54 h
INSTRUM  spect
PROBHD   z116098_0673 (
PULPROG  zgpg30
TD       65536
SOLVENT  CDCl3
NS       256
DS       4
SHE      24038.461 Hz
FIDRES   0.733596 Hz
AQ        1.3631988 sec
RG        203.48
DW        20.800 usec
DE        6.50 usec
TE        298.2 K
D1        2.0000000 sec
D11       0.0300000 sec
TDO       1
SFO1     100.6228298 MHz
NUC1      13C
P1        10.00 usec
SI        32768
SF        100.6127744 MHz
WDW       EM
SSB       0
LB        1.00 Hz
GB        0
PC        1.40
  
```

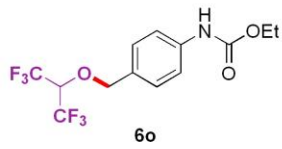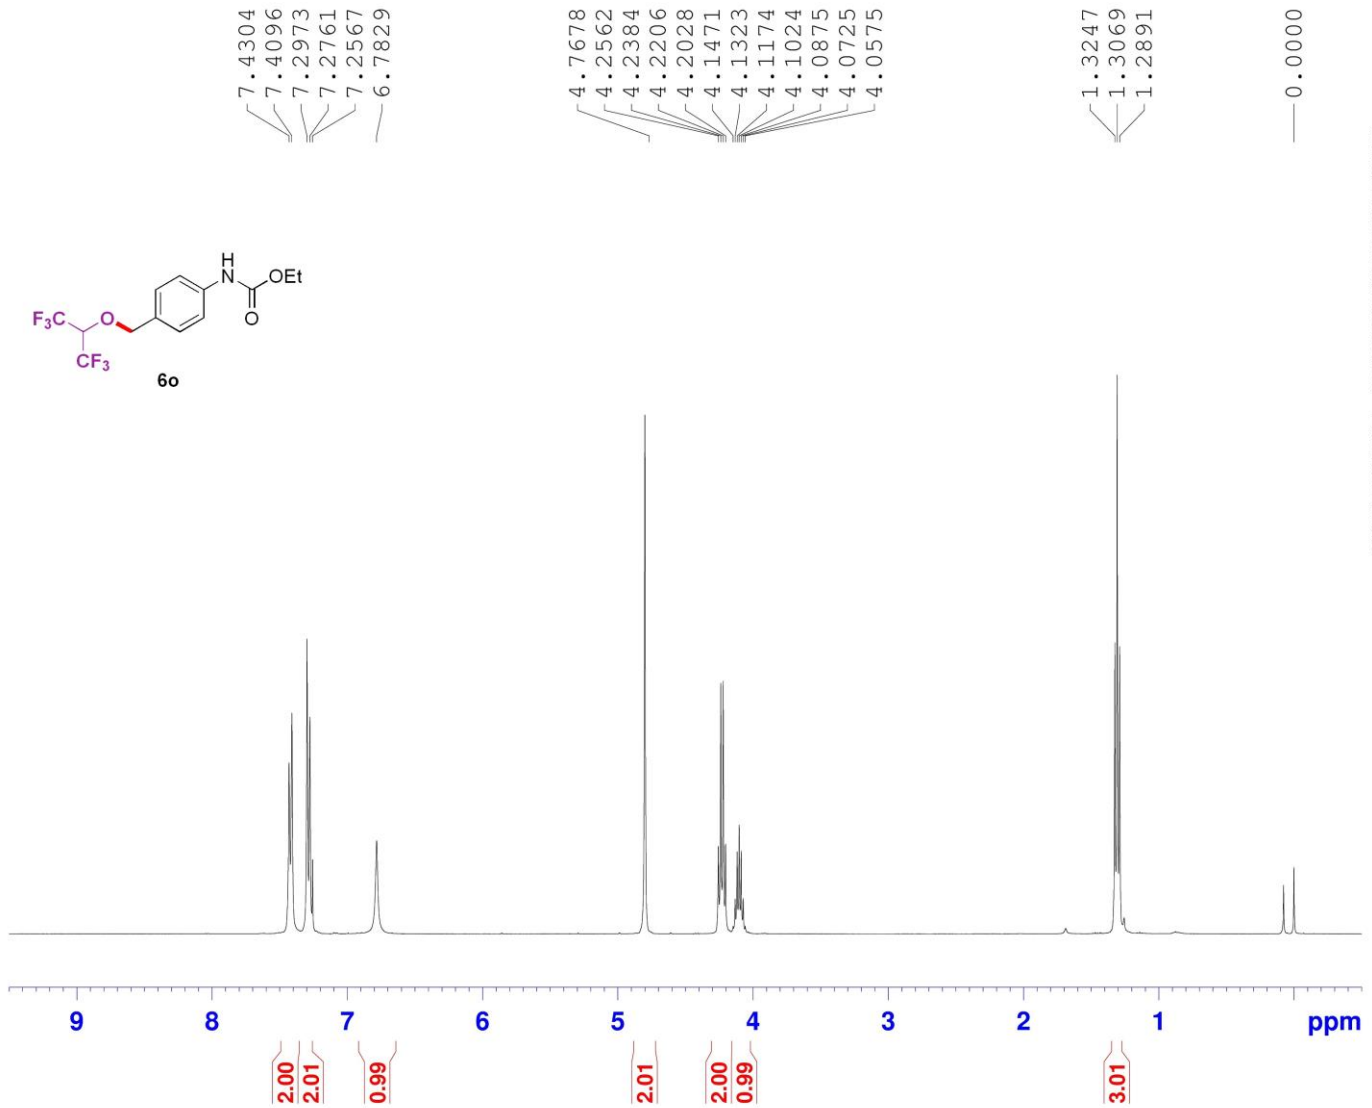

```

NAME      CLJ-WL-SZ132
EXPNO     1
PROCNO    1
Date_     20191217
Time      18.48
INSTRUM   spect
PROBHD    5 mm PABBO BB/
PULPROG   zg30
TD         65536
SOLVENT   CDCl3
NS         8
DS         0
SWH       8012.820 Hz
FIDRES    0.122266 Hz
AQ         4.0894966 sec
RG         41.07
DW         62.400 usec
DE         6.50 usec
TE         300.7 K
D1         1.00000000 sec
TD0        1
----- CHANNEL f1 -----
SF01      400.1324710 MHz
NUC1       1H
P1         8.04 usec
SI         65536
SF         400.1300108 MHz
WDW        EM
SSB        0
LB         0.30 Hz
GB         0
PC         1.00
  
```



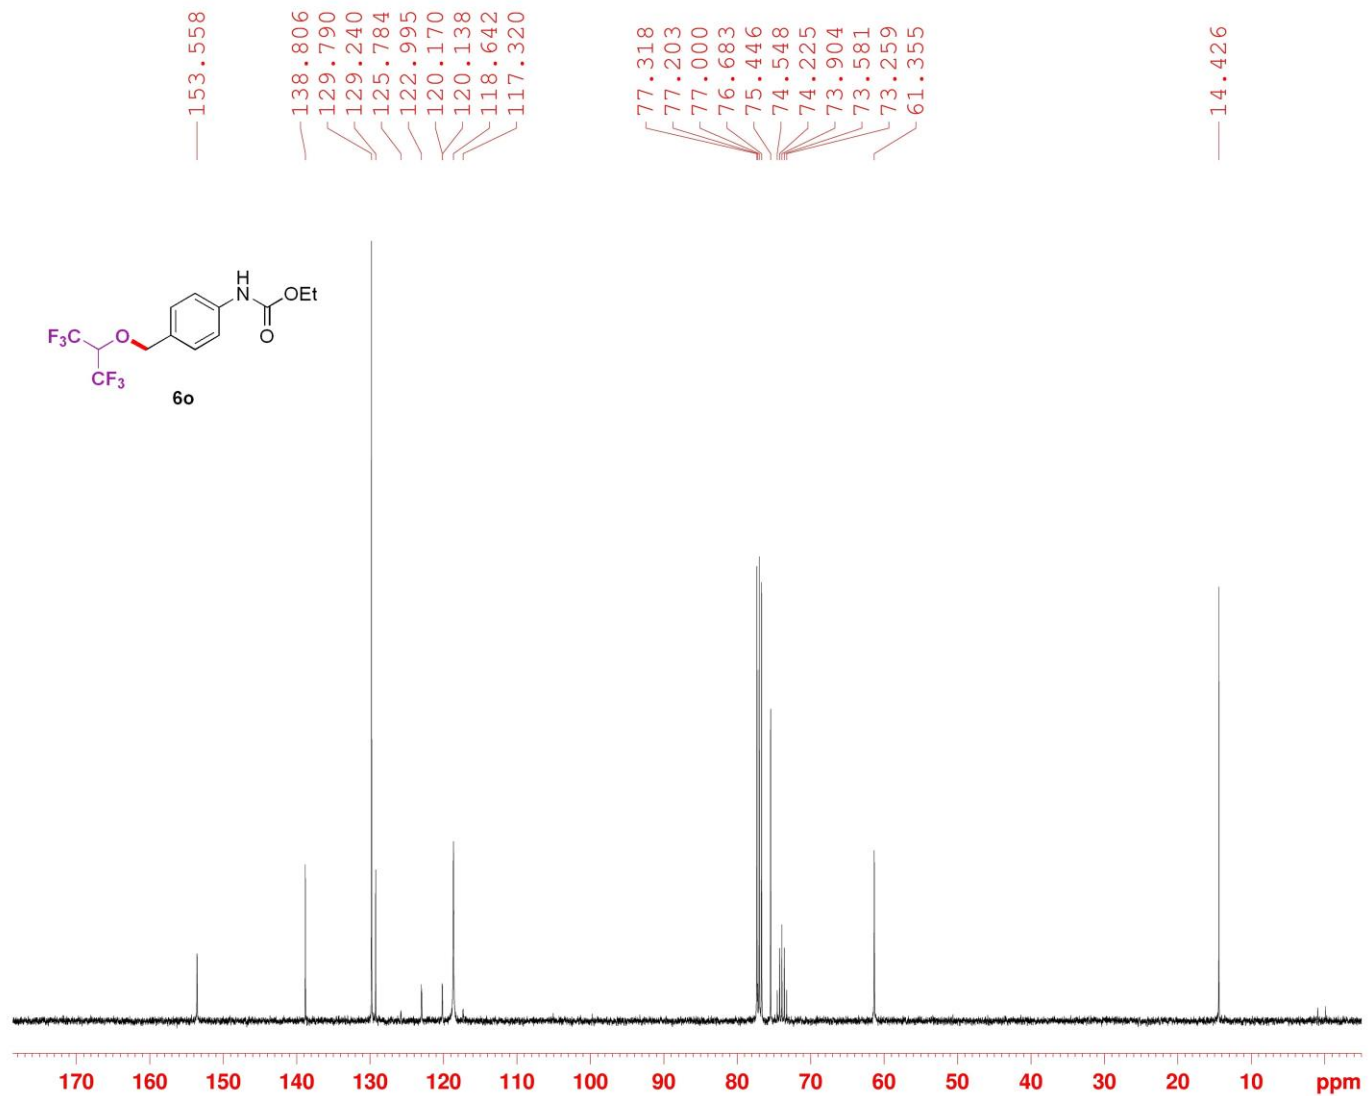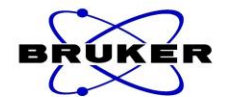

```

NAME      2019-12-31 shaozhong-142
EXPNO     1
PROCNO    1
Date_     20191231
Time      11.29 h
INSTRUM   spect
PROBHD    Z116098_0673 (
PULPROG   zgpg30
TD         65536
SOLVENT   CDCl3
NS         256
DS         4
SWH        24038.461 Hz
FIDRES     0.733596 Hz
AQ         1.3631988 sec
RG         203.48
DW         20.800 usec
DE         6.50 usec
TE         298.2 K
D1         2.00000000 sec
D11        0.03000000 sec
TDO        1
SFO1       100.6228298 MHz
NUC1       13C
P1         10.00 usec
SI         32768
SF         100.6127723 MHz
WDW        EM
SSB        0
LB         1.00 Hz
GB         0
PC         1.40

```

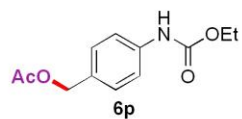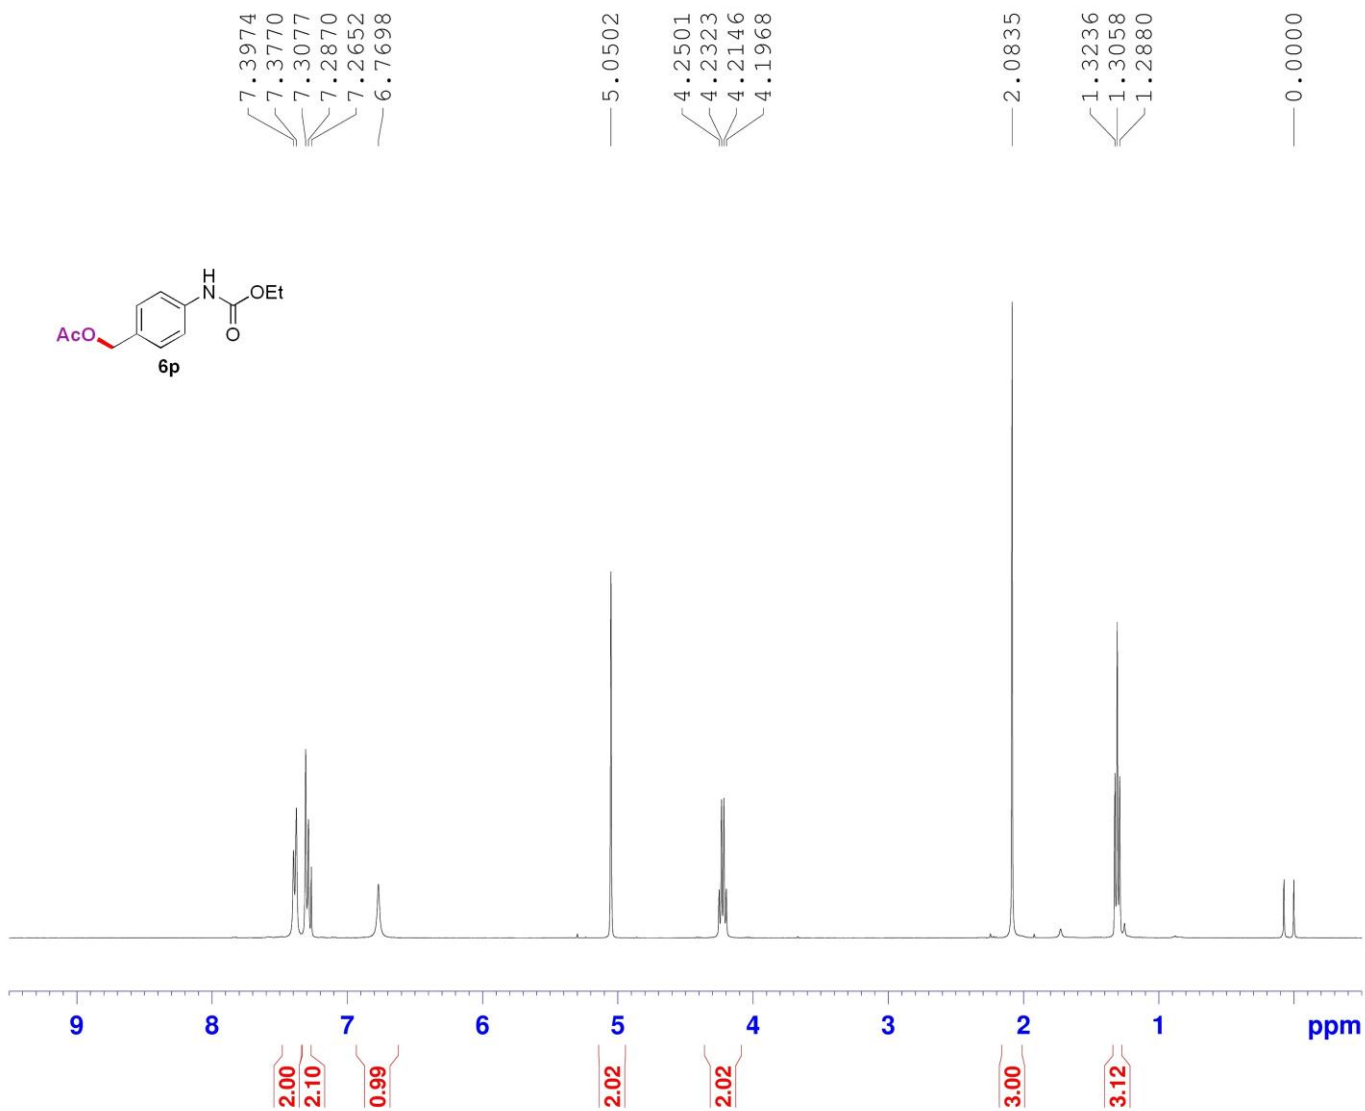

```

NAME      CLJ-WL-SZ161
EXPNO     1
PROCNO    1
Date_     20200115
Time      23.14
INSTRUM   spect
PROBHD    5 mm PABBO BB/
PULPROG   zg30
TD         65536
SOLVENT   CDCl3
NS         8
DS         0
SWH       8012.820 Hz
FIDRES    0.122266 Hz
AQ         4.0894966 sec
RG         70.36
DW         62.400 usec
DE         6.50 usec
TE         298.0 K
D1         1.00000000 sec
TD0        1

----- CHANNEL f1 -----
SF01      400.1324710 MHz
NUC1       1H
P1         8.04 usec
SI         65536
SF         400.1300070 MHz
WDW        EM
SSB        0
LB         0.30 Hz
GB         0
PC         1.00

```

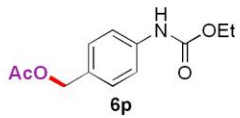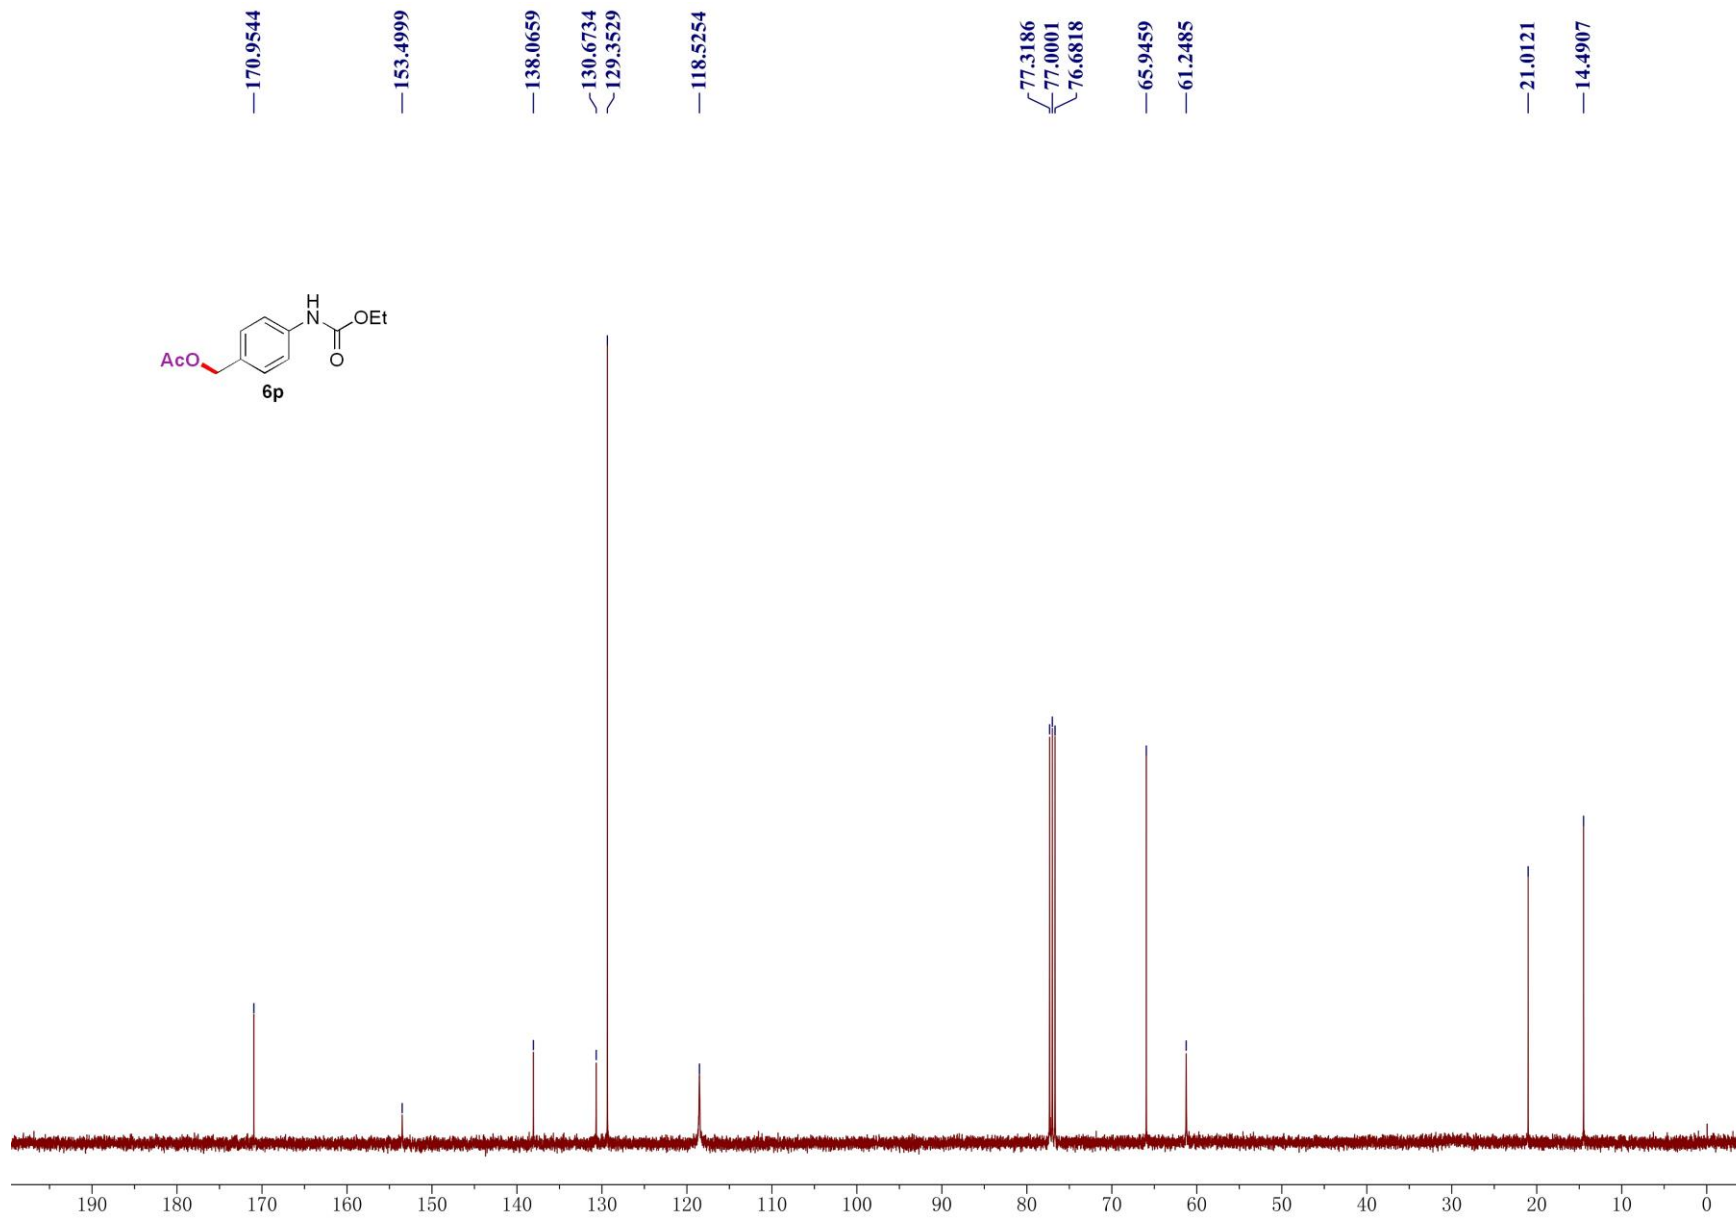

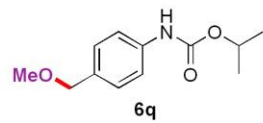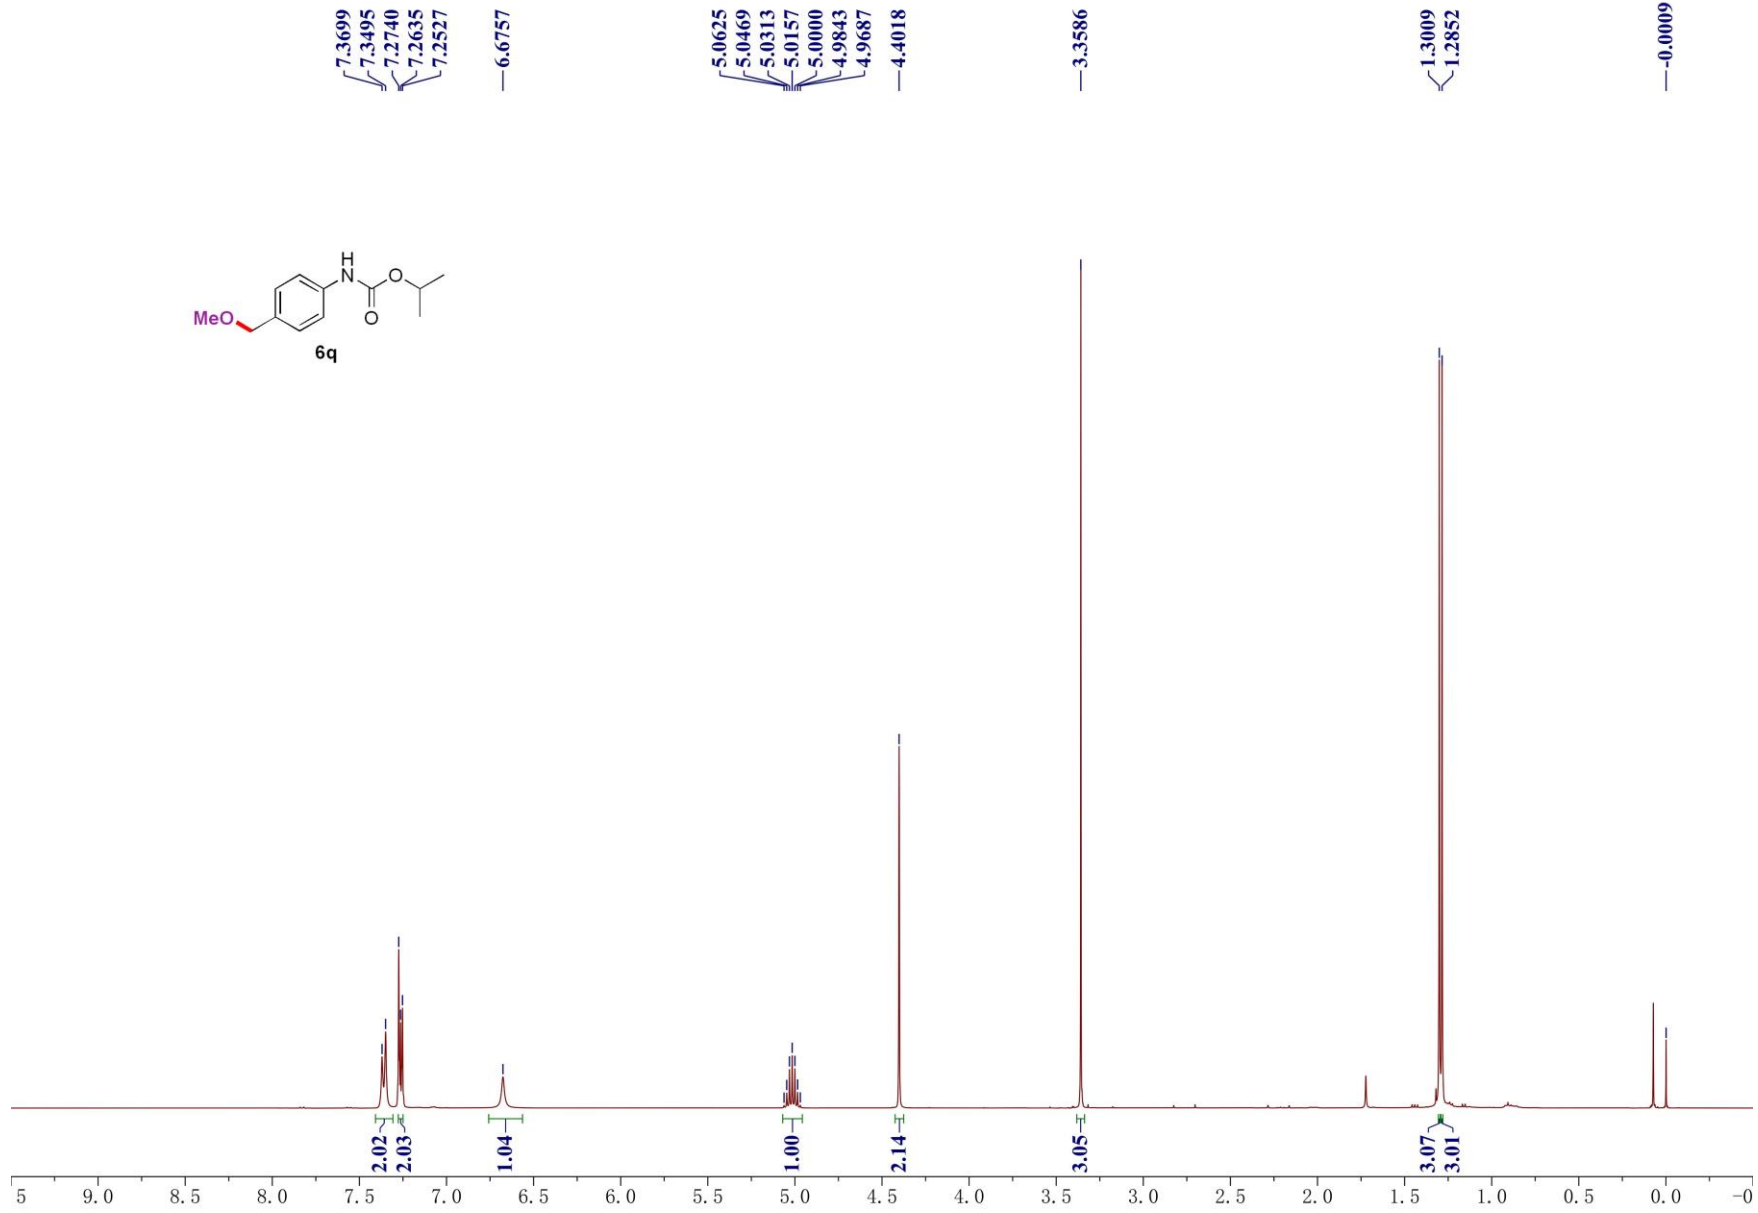

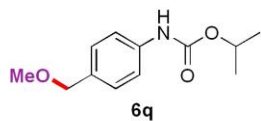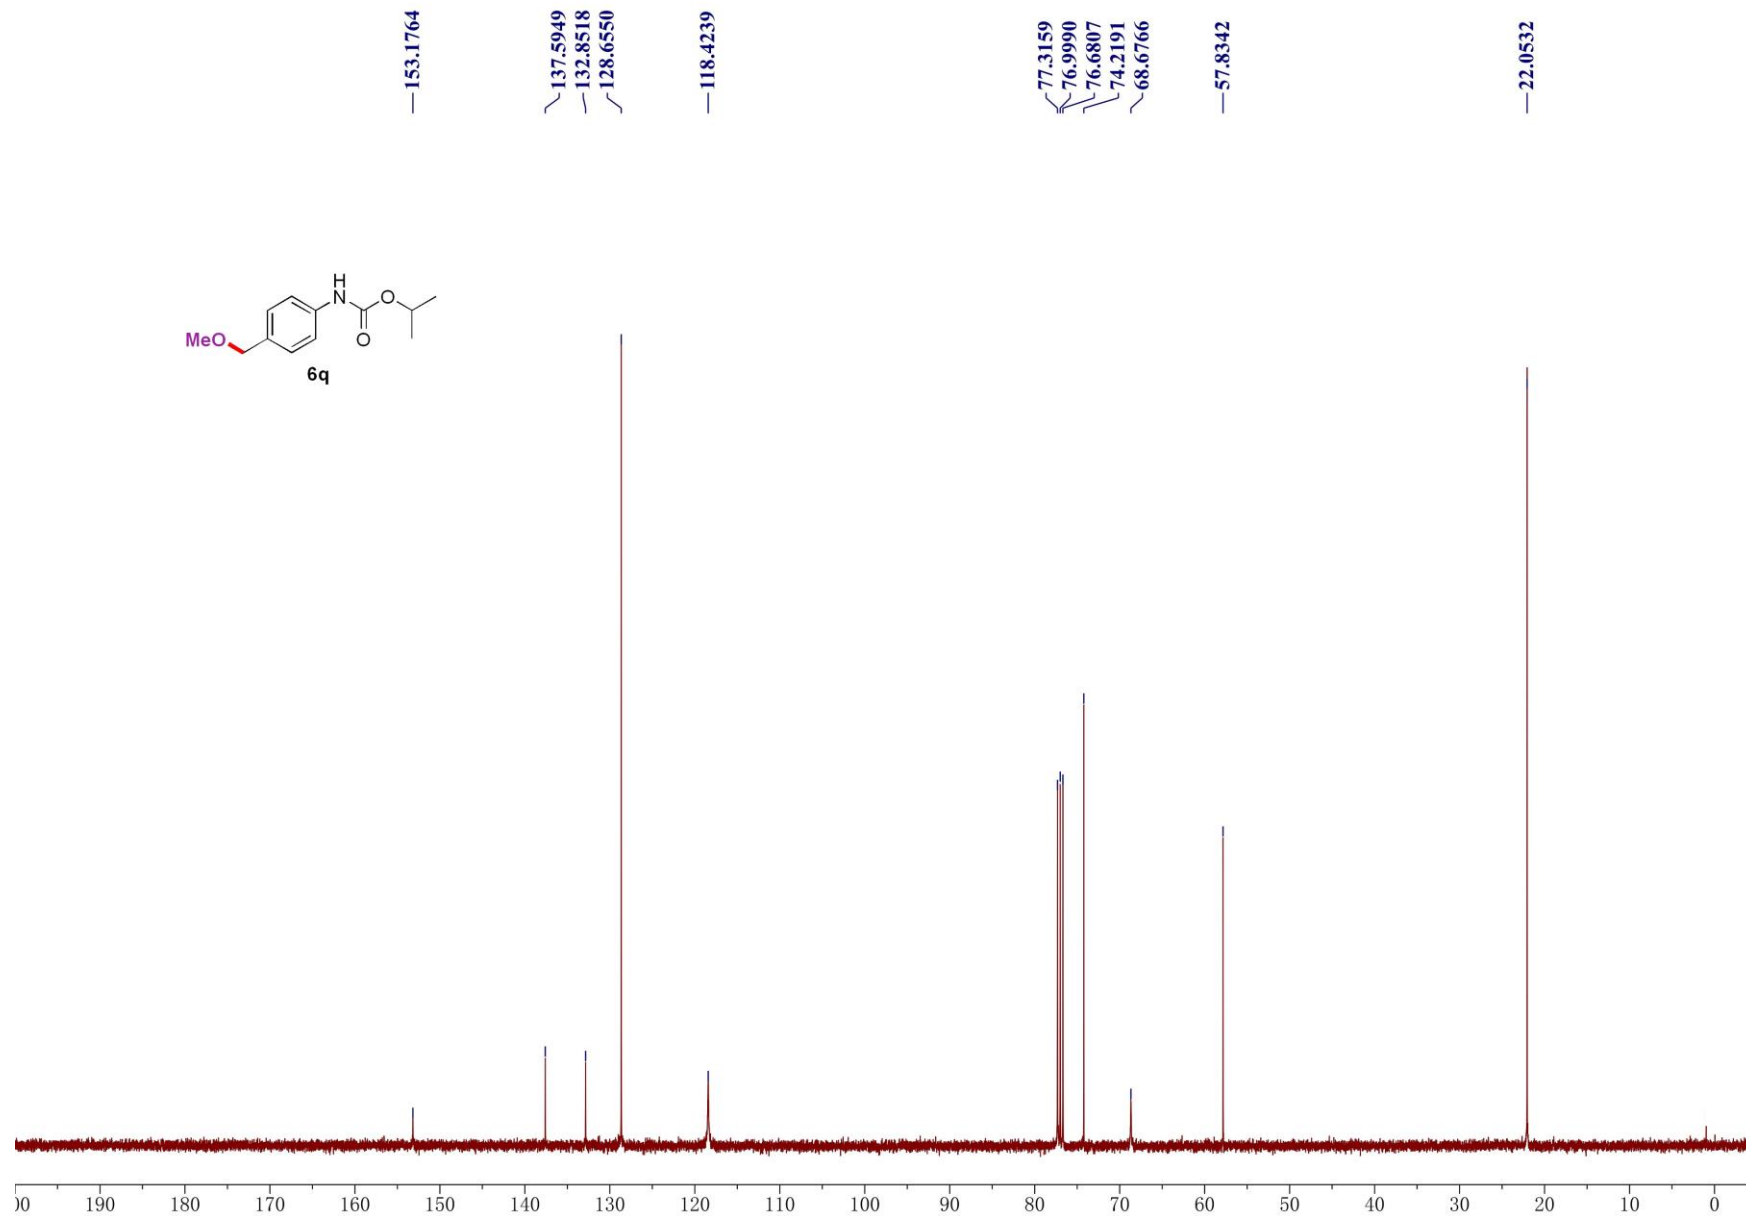

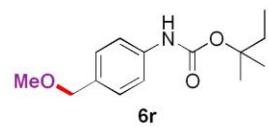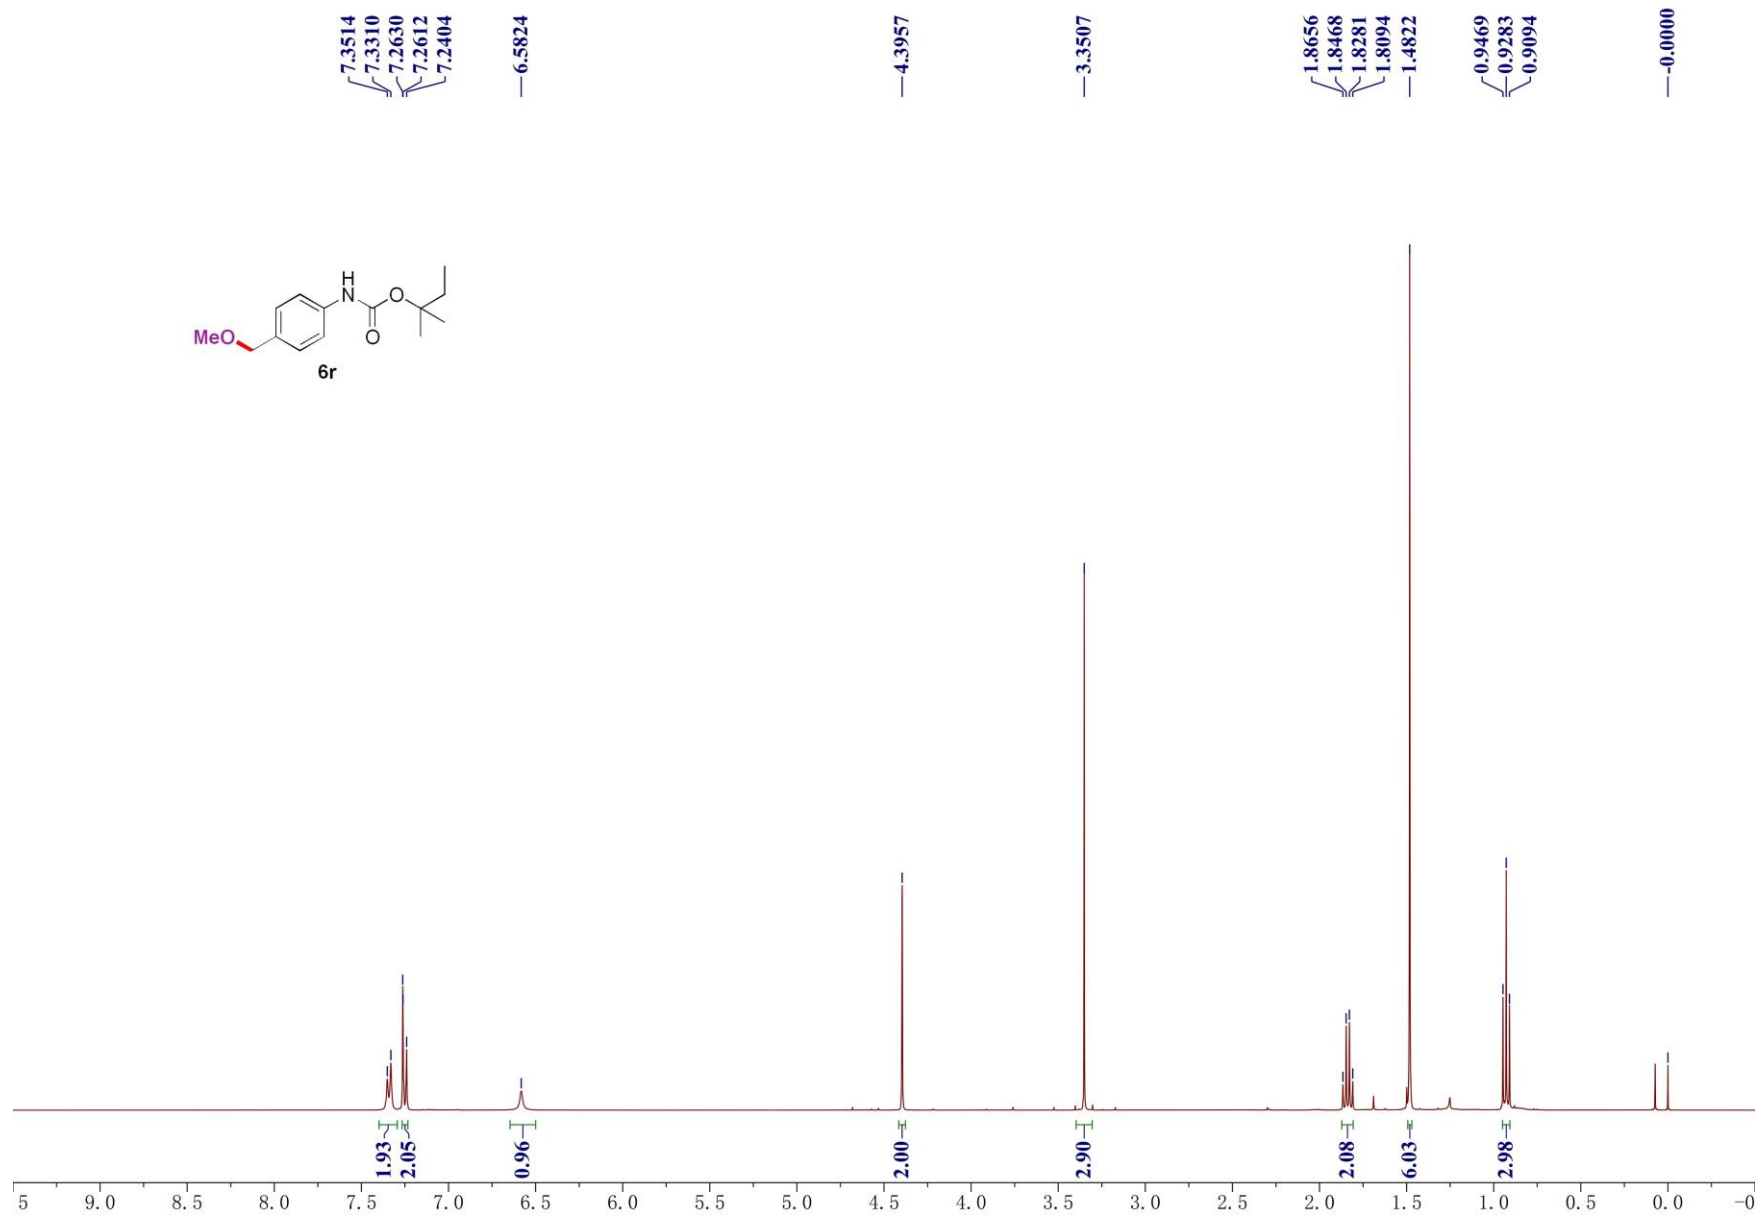

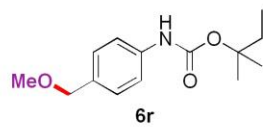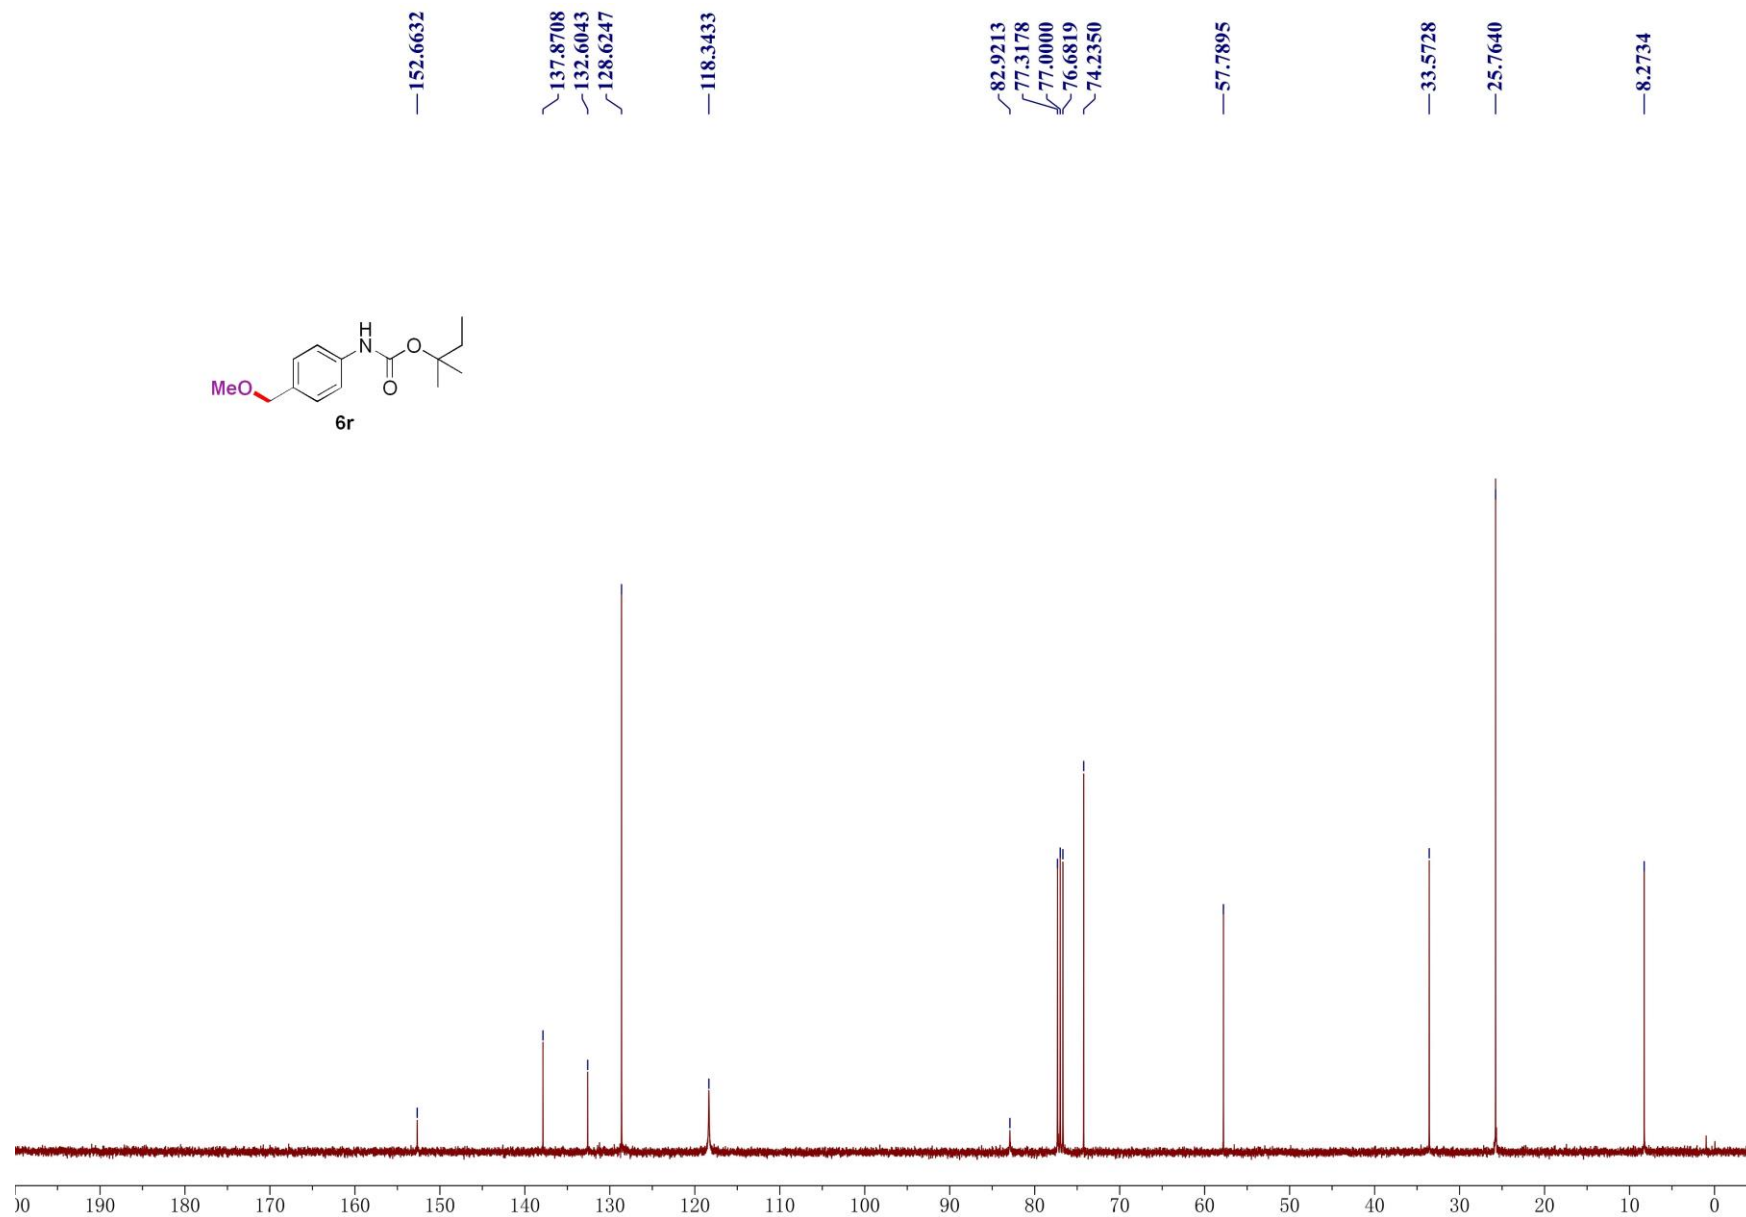

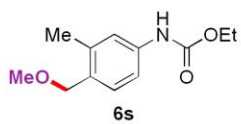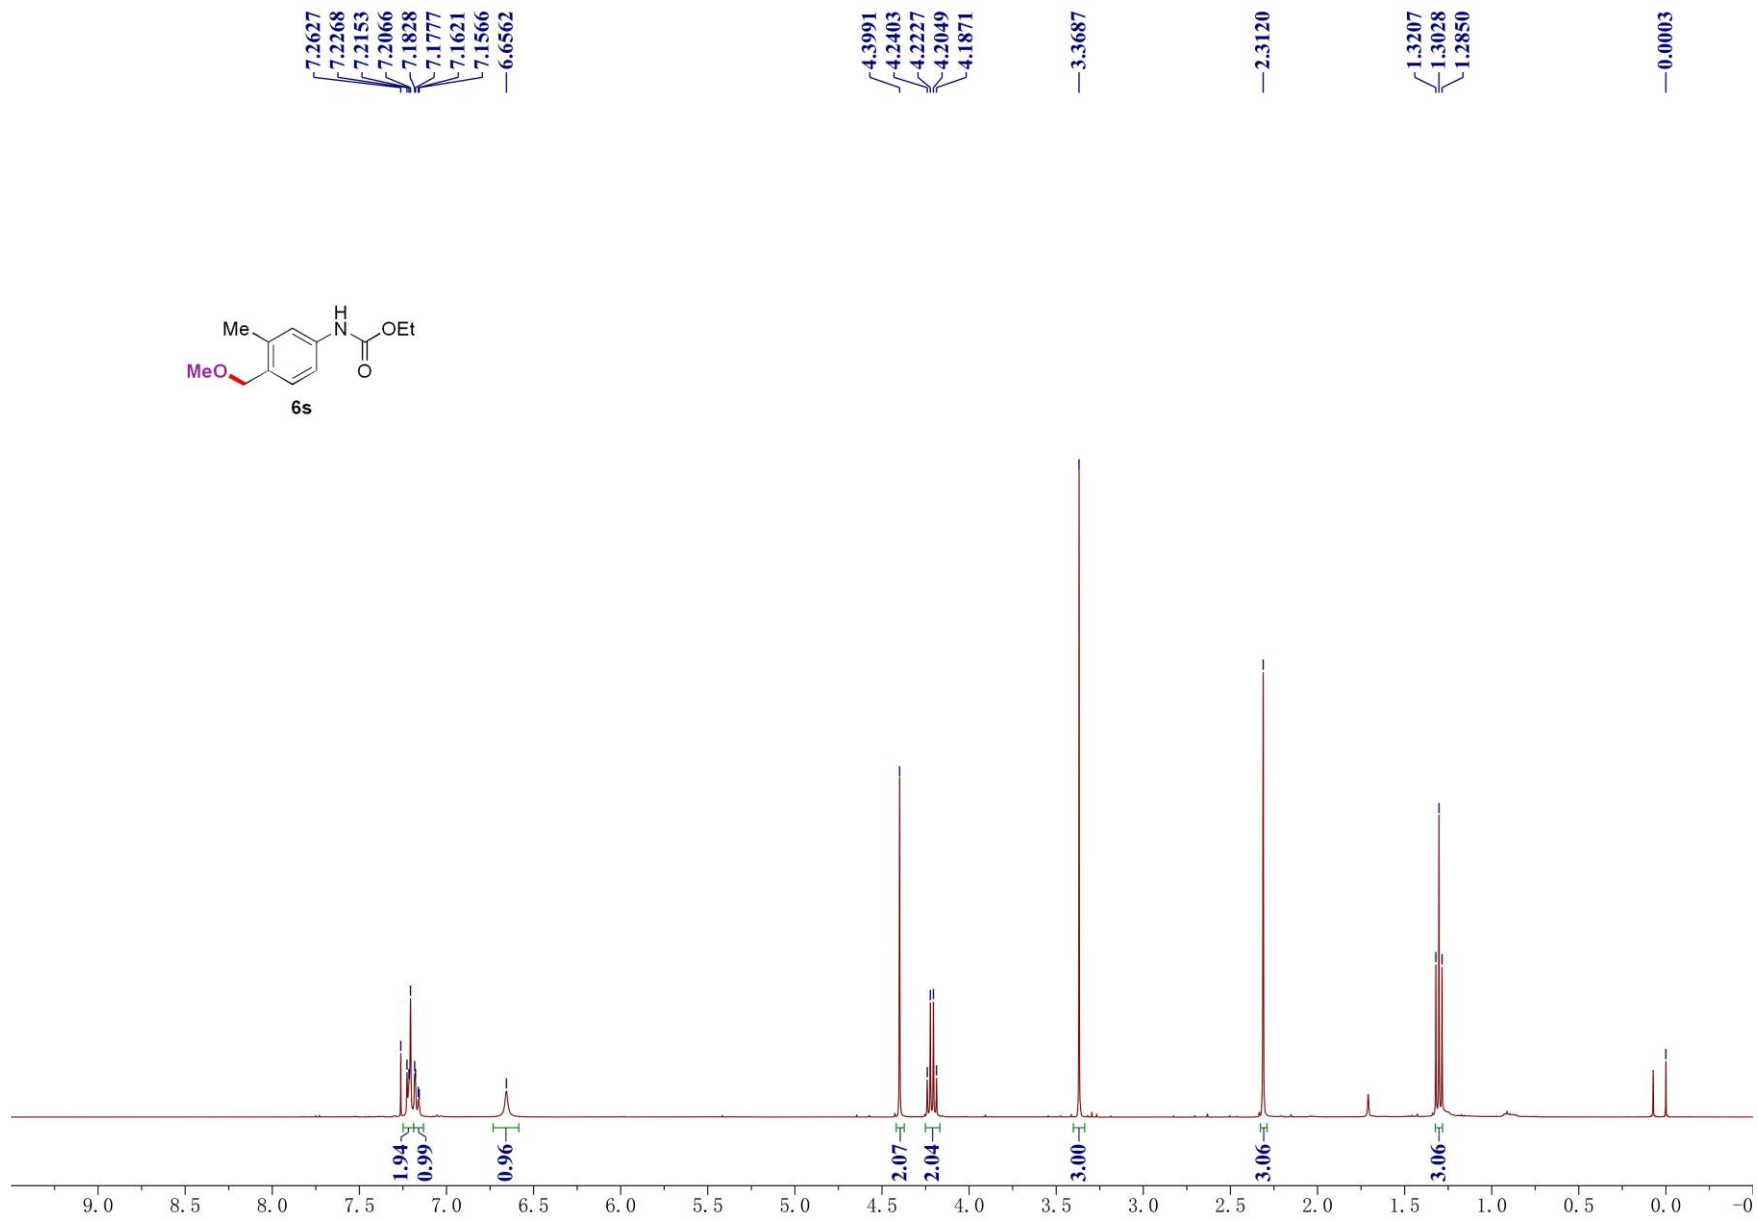



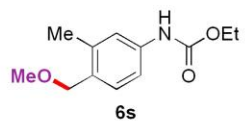

—153.5730

—137.8769  
—137.5074

—131.0480  
—129.6108

—120.2814  
—115.6781

—77.3179  
—77.0000  
—76.6833  
—72.5946

—61.1210  
—57.9088

—18.8380  
—14.5151

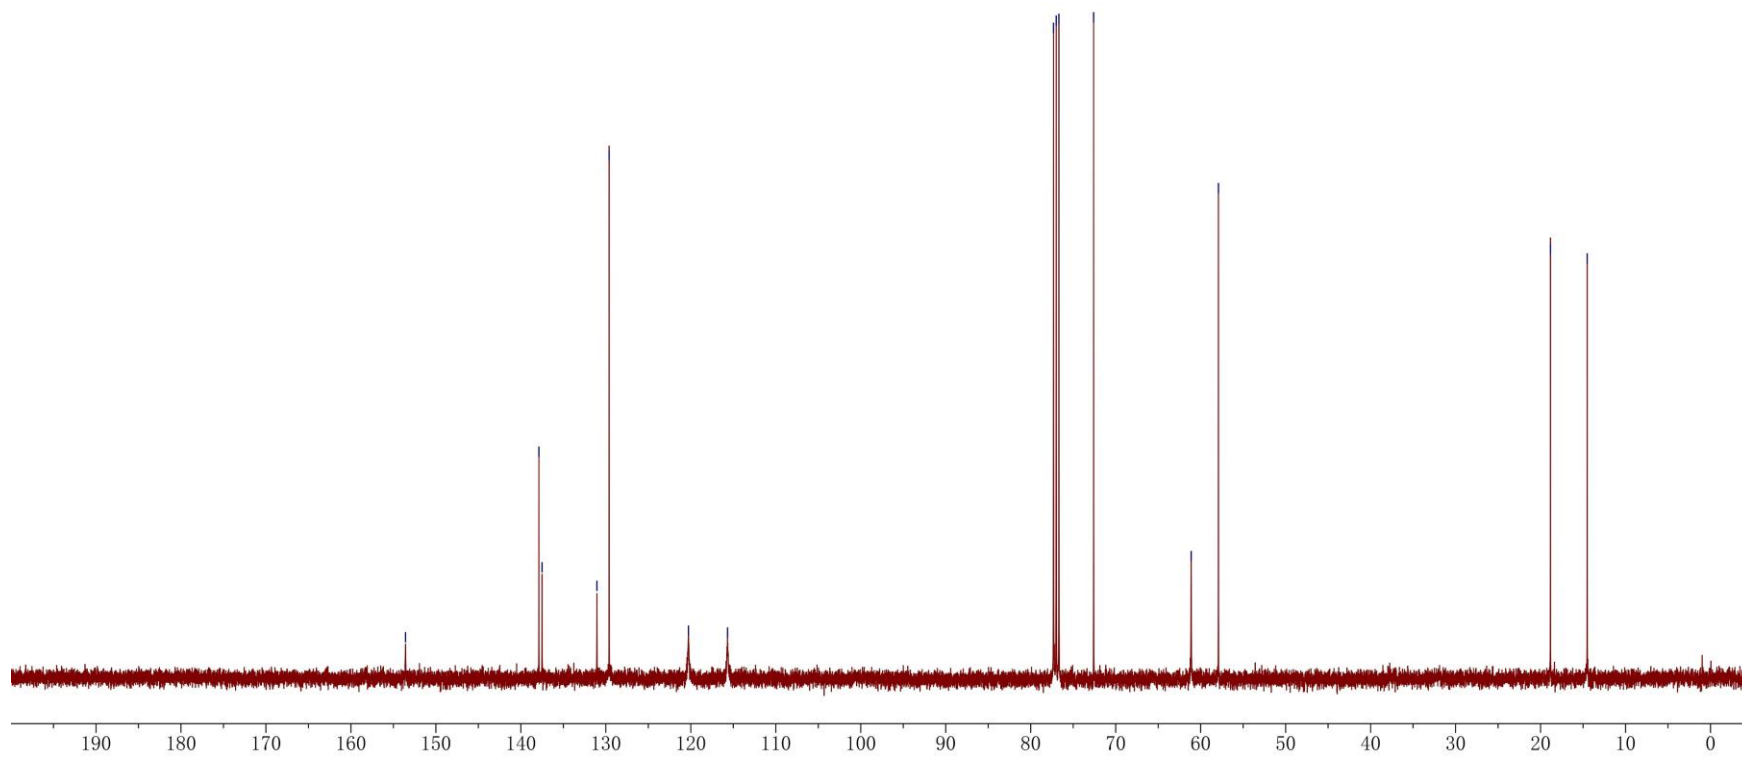

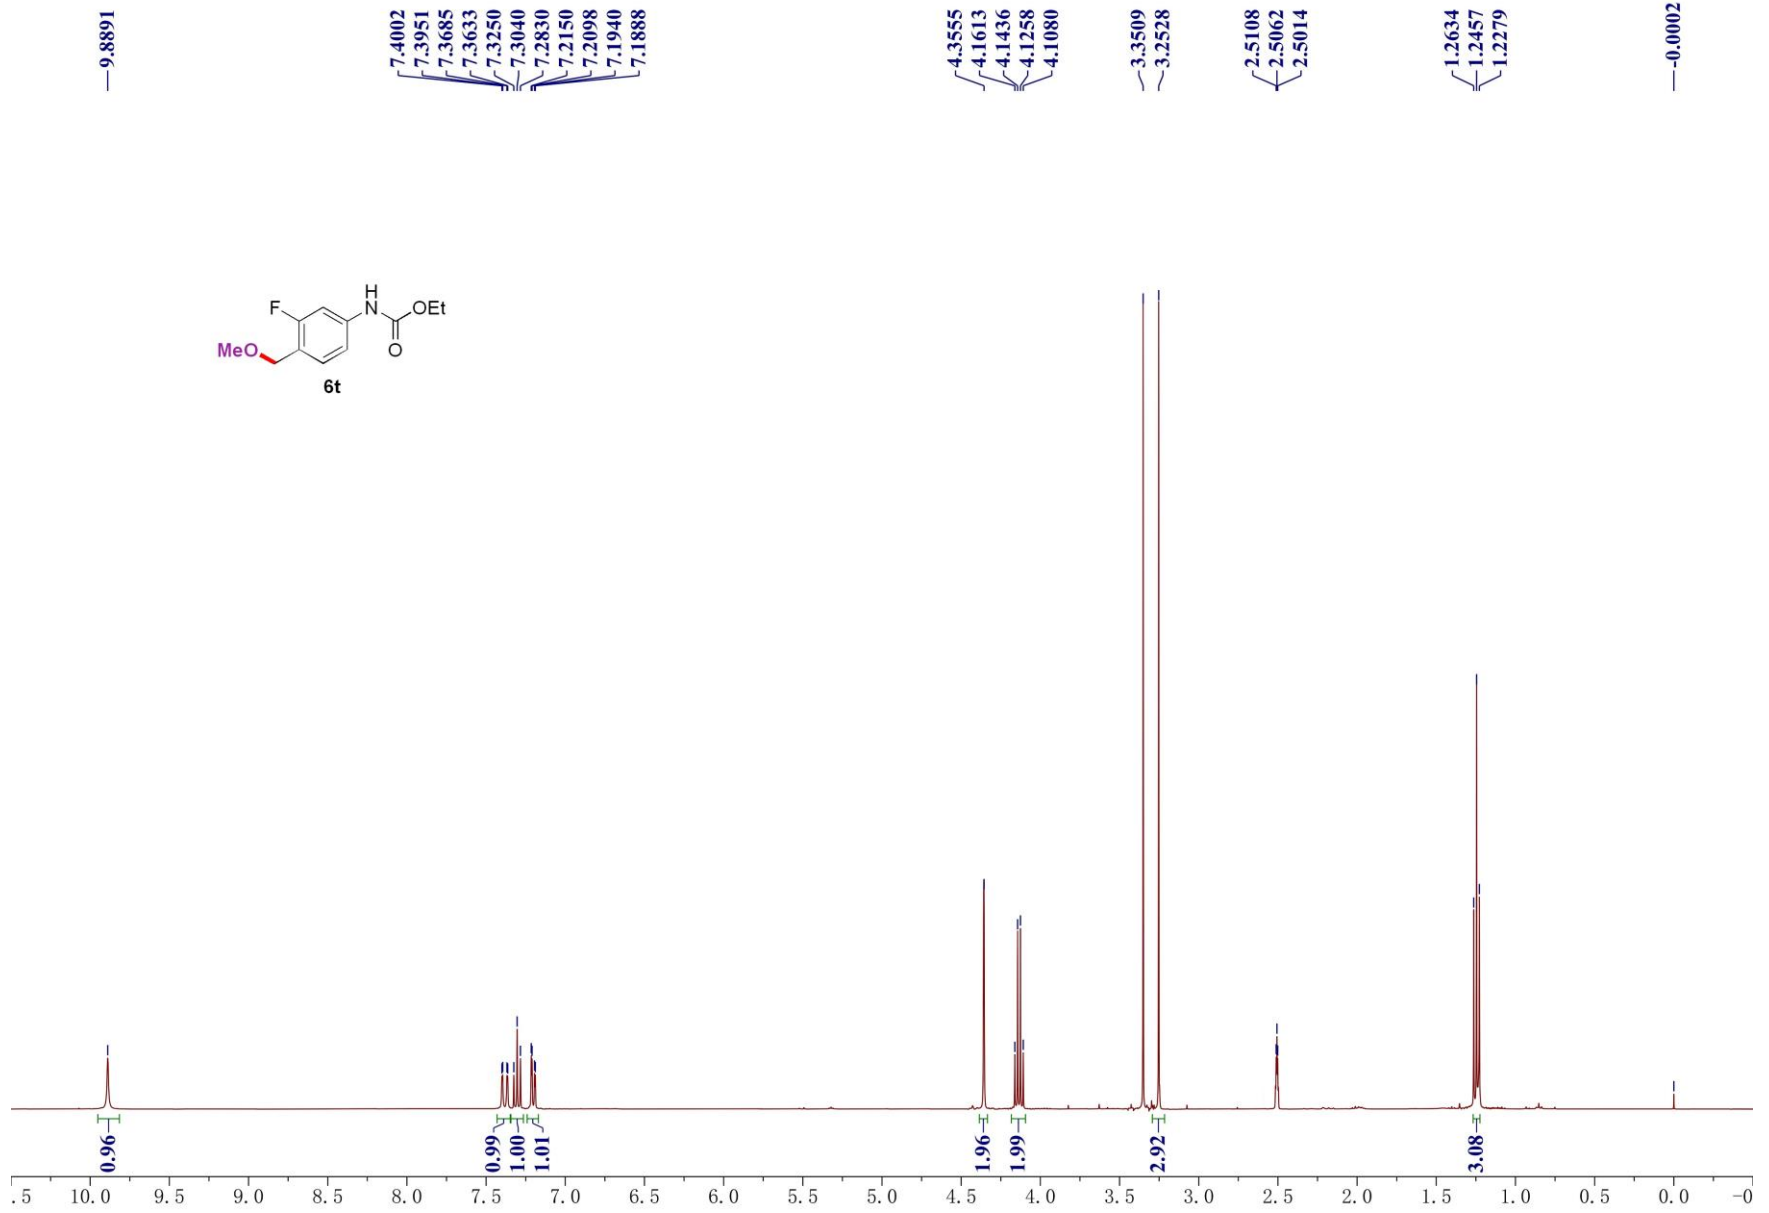

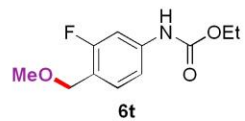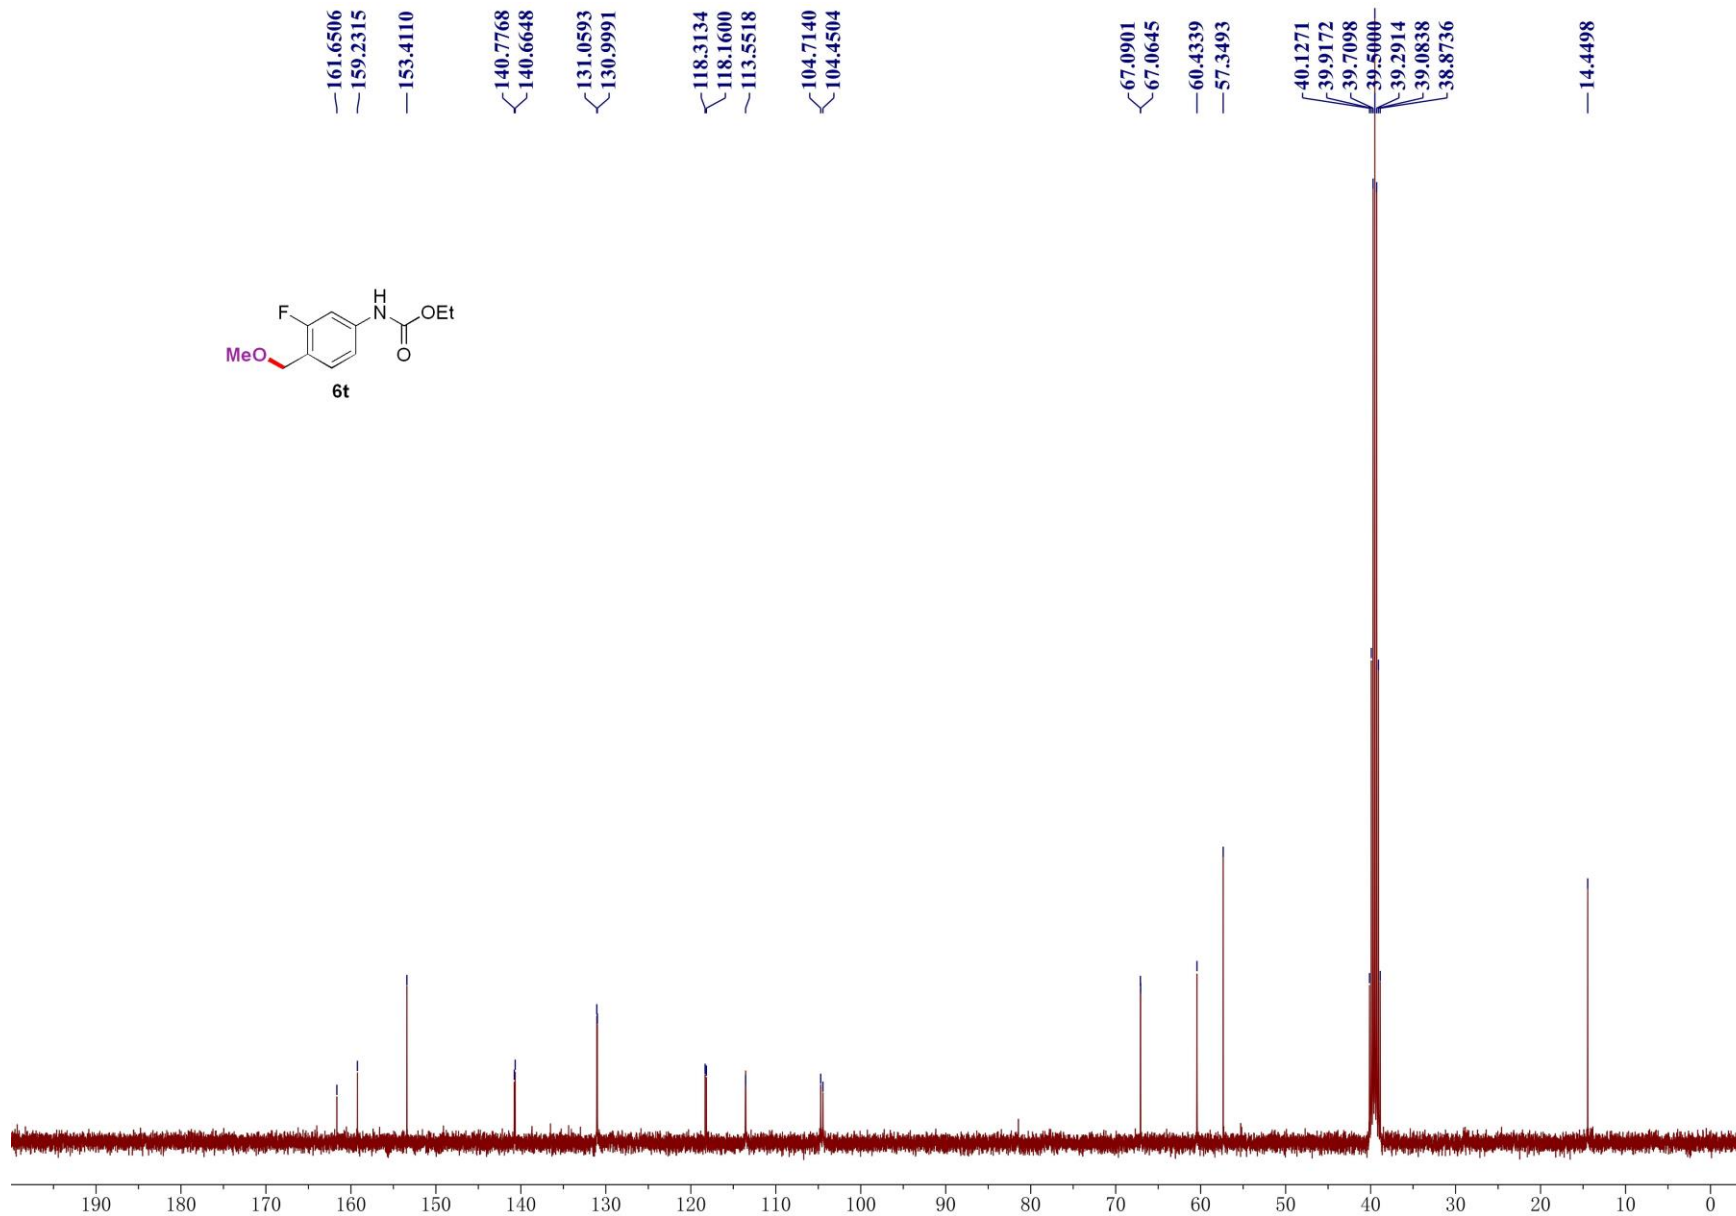

7.9831  
7.4962  
7.4765  
7.3242  
7.3039  
7.2670  
7.2473  
7.2305  
7.1999  
7.1796  
7.1630  
7.1436  
7.0776  
7.0591  
7.0404  
6.8365  
6.5741

4.2269  
4.2092  
4.1914  
4.1737  
4.0440

1.3027  
1.2849  
1.2671

0.0000

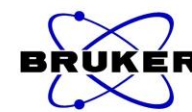

```

NAME      2019-12-02 shanzhong-S2125
EXPNO     1
PROCNO    1
Date_     20191202
Time      15.28 h
INSTRUM   spect
PROBHD    z116098_0673 (
PULPROG   zg30
TD         65536
SOLVENT   CDCl3
NS         16
DS         2
SWH        8012.820 Hz
FIDRES     0.244532 Hz
AQ         4.0894966 sec
RG         51.13
DW         62.400 usec
DE         6.50 usec
TE         295.4 K
D1         1.00000000 sec
TDO        1
SFO1       400.1324708 MHz
NUC1       1H
P1         10.00 usec
S1         65536
SF         400.1300215 MHz
WOM        EM
SBB         0
LB         0.30 Hz
GB         0
PC         1.00
  
```

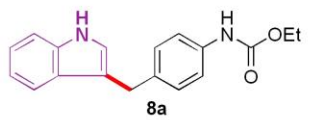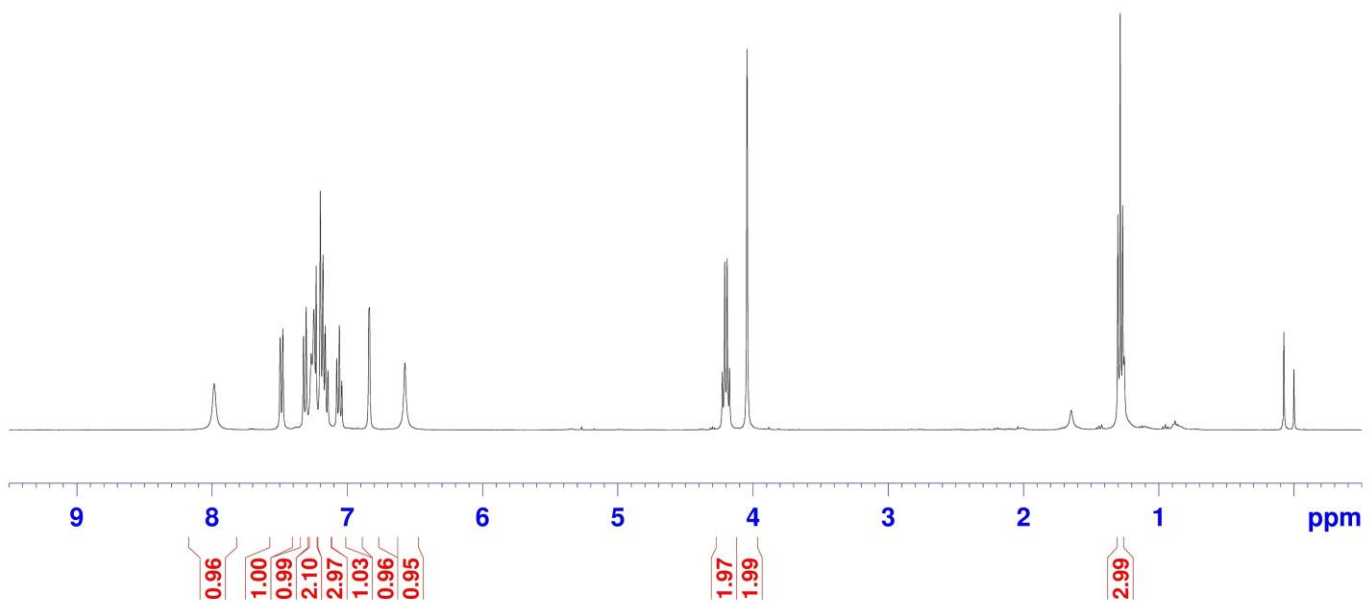

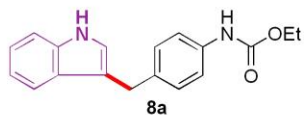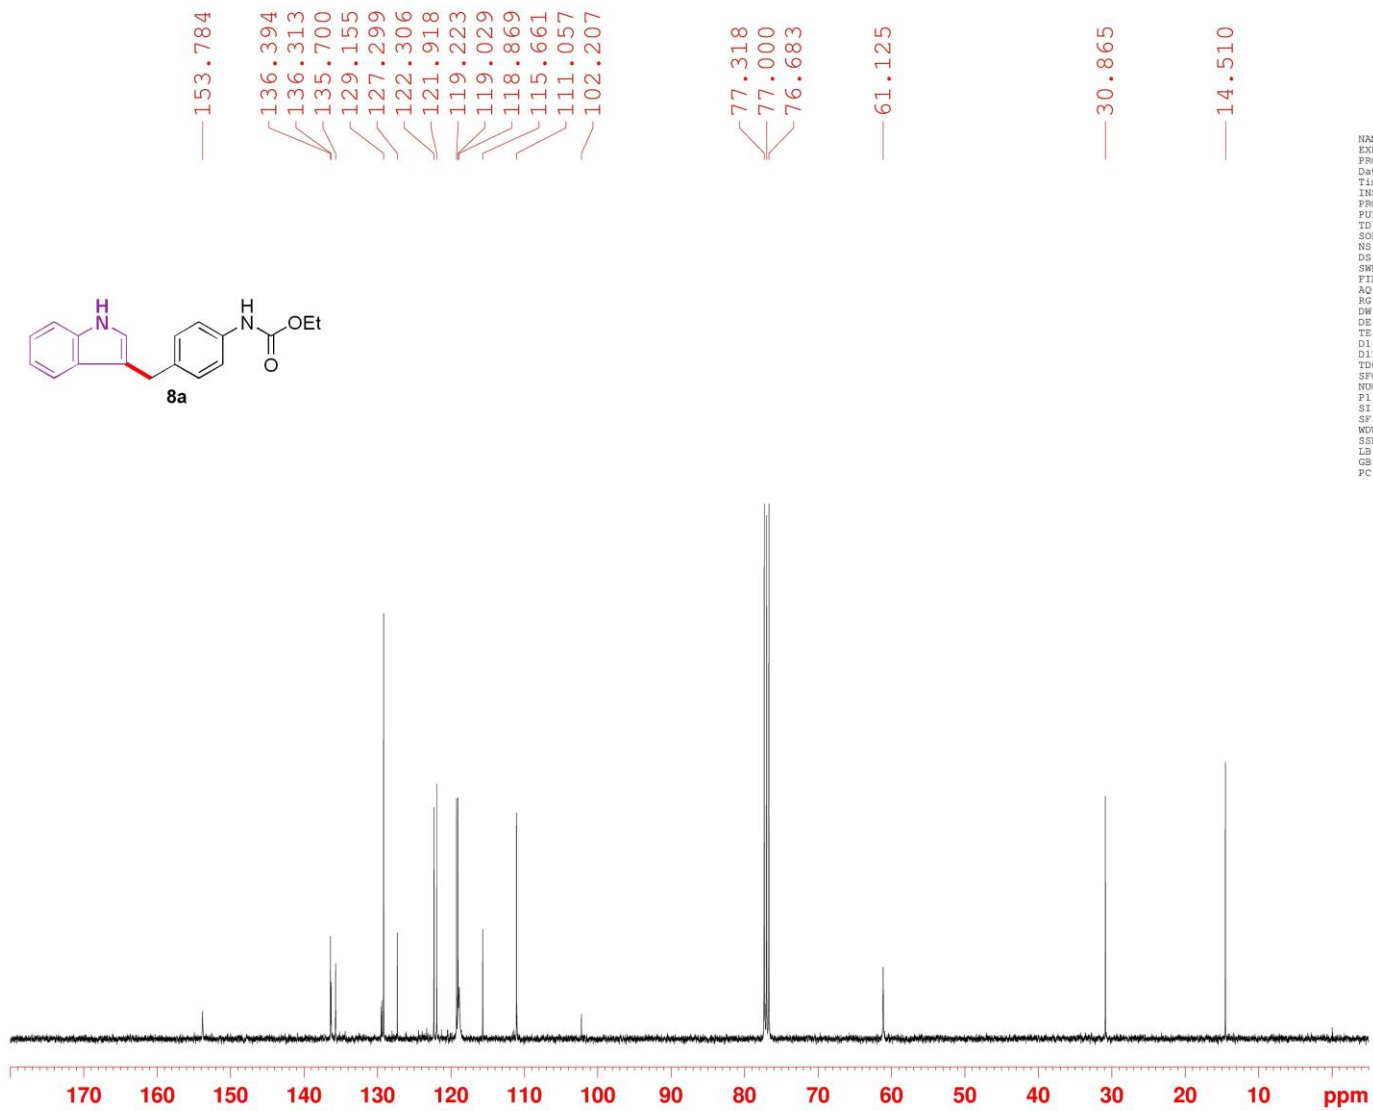

```

NAME      2019-12-20 shaohong-S2126
EXPNO    1
PROCNO   1
Date_    20191221
Time     22.49 h
INSTRUM  spect
PROBHD   z116098_0673 (
PULPROG  zgpg30
TD       65536
SOLVENT  CDCl3
NS       256
DS       0
SWH      24038.461 Hz
FIDRES   0.733596 Hz
AQ       1.3631988 sec
RG       203.48
DW       20.800 usec
DE       6.50 usec
TE       298.1 K
D1       2.0000000 sec
D11      0.0300000 sec
TDD      1
SFO1     100.6228298 MHz
NUC1     13C
P1       10.00 usec
SI       32768
SF       100.6127790 MHz
WDW      EM
SGB      0
LB       1.00 Hz
GB       0
PC       1.40
  
```

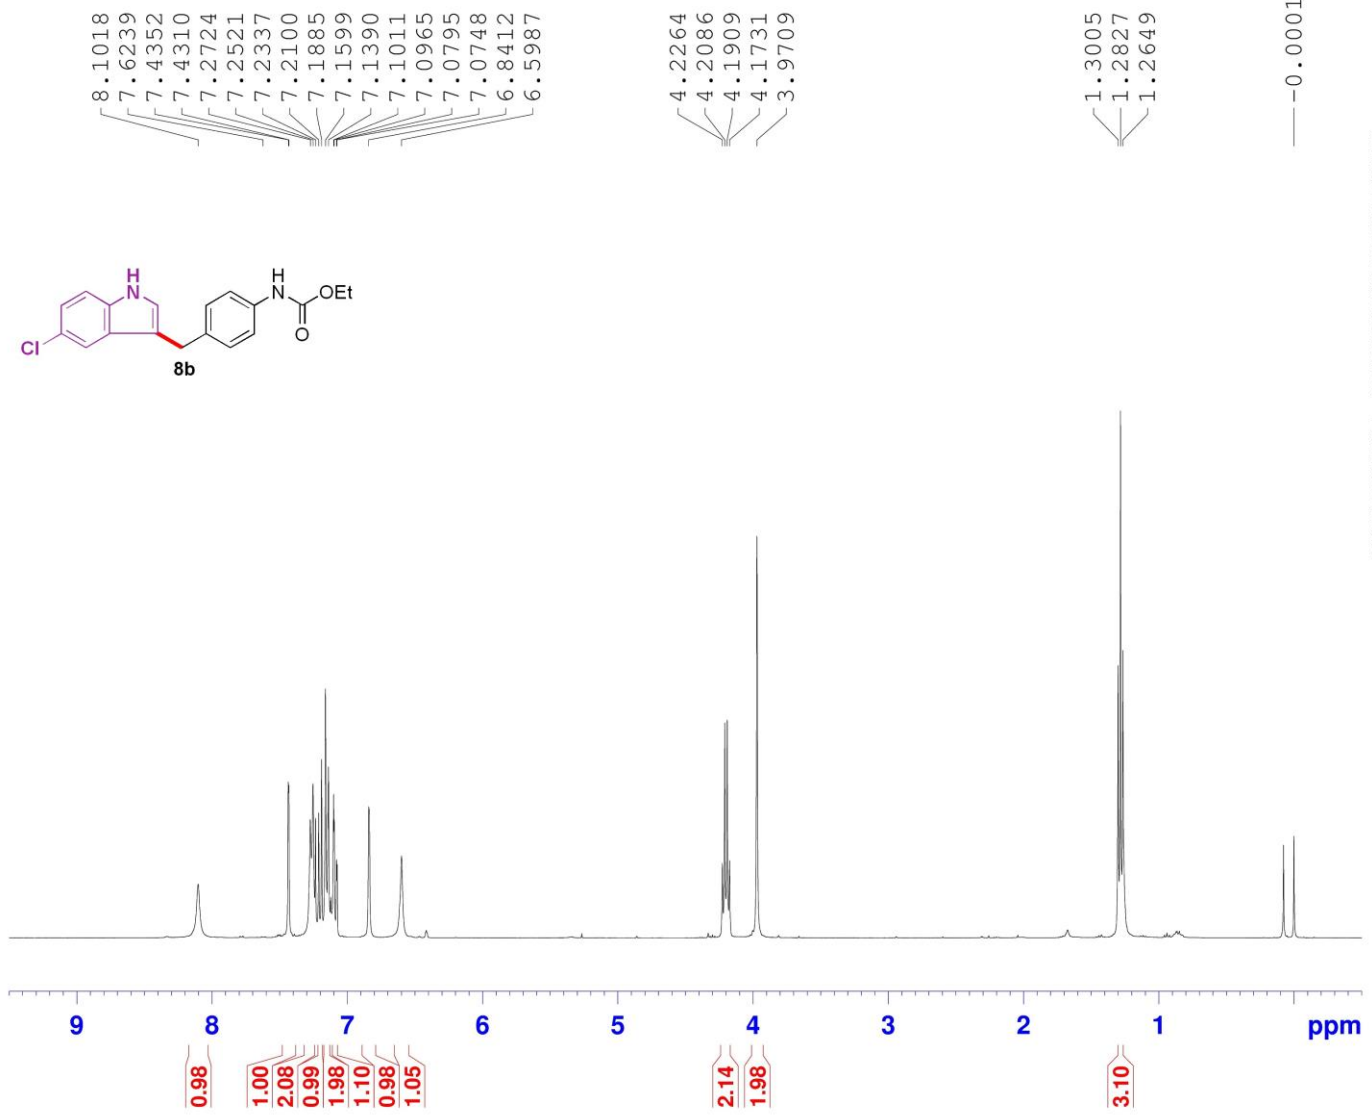

**BRUKER**

```

NAME      CLJ-WL-SZ134
EXPNO     1
PROCNO    1
Date_     20191219
Time      19.33
INSTRUM   spect
PROBHD    5 mm PABBO BB/
PULPROG   zg30
TD         65536
SOLVENT   CDCl3
NS         8
DS         0
SWH        8012.820 Hz
FIDRES     0.122266 Hz
AQ         4.0894966 sec
RG         41.07
DW         62.400 usec
DE         6.50 usec
TE         300.6 K
D1         1.0000000 sec
TD0        1

----- CHANNEL f1 -----
SF01      400.1324710 MHz
NUC1       1H
P1         8.04 usec
SI         65536
SF         400.1300199 MHz
WDW        EM
SSB        0
LB         0.30 Hz
GB         0
PC         1.00

```

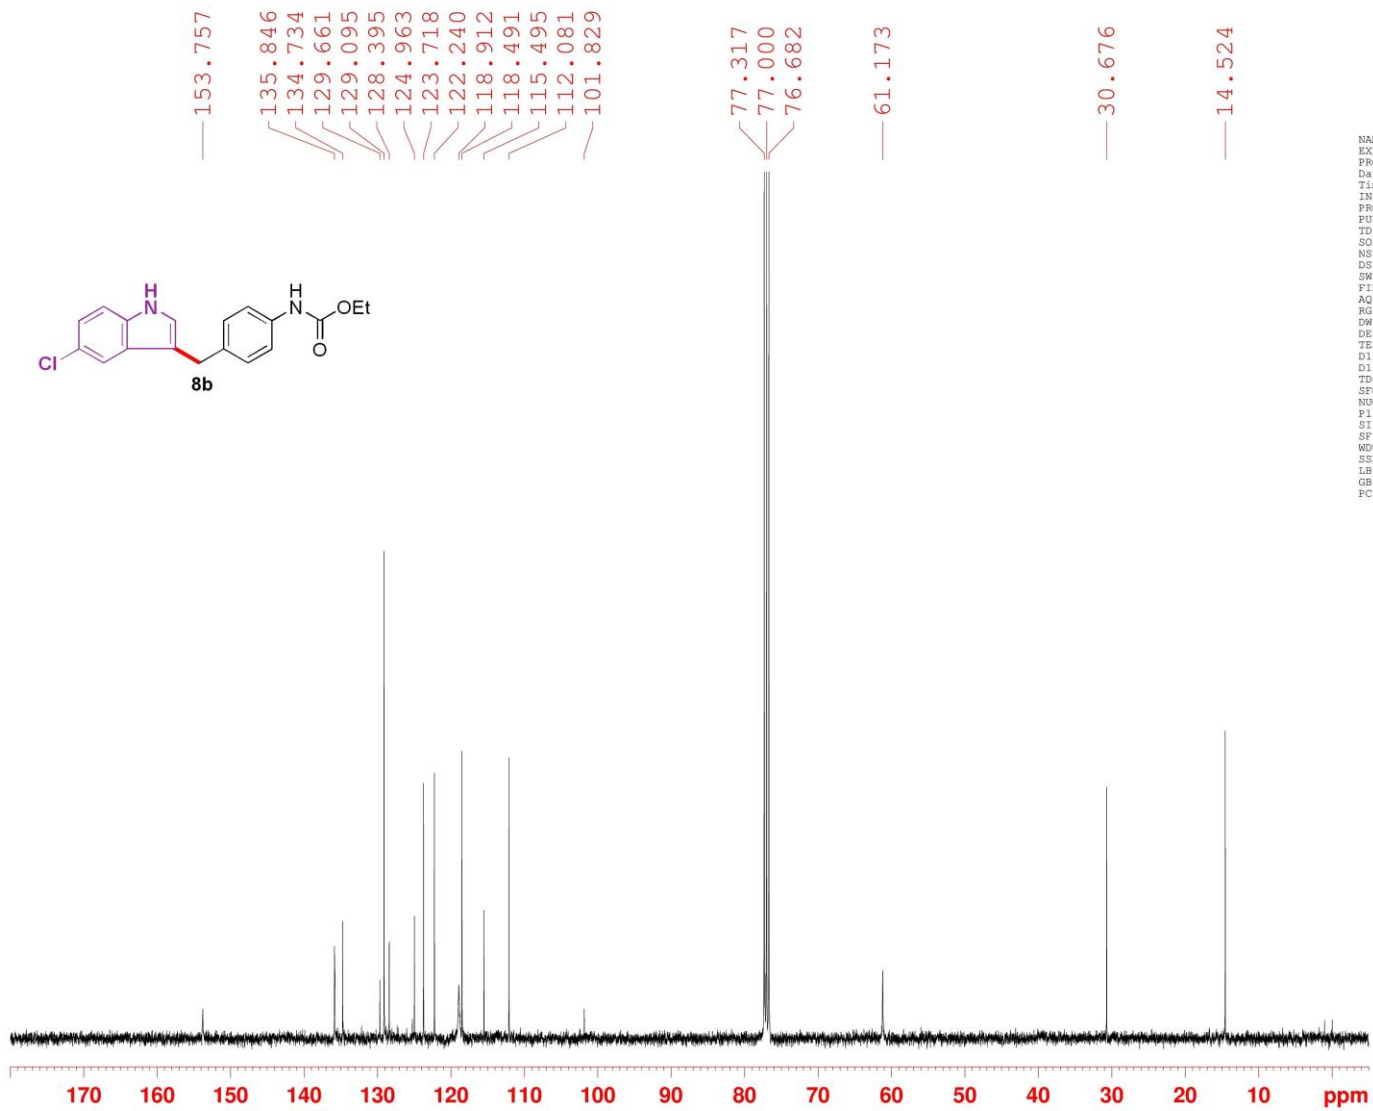

```

NAME      2019-12-26 shaozhong-134
EXPNO    1
PROCNO   1
Date_    20191226
Time     16.25 h
INSTRUM  spect
PROBHD   Z116098_0673 (
PULPROG  zgpg30
TD        65536
SOLVENT  CDCl3
NS        256
DS        4
SWH       24038.461 Hz
FIDRES   0.733596 Hz
AQ        1.3631988 sec
RG        203.48
DW        20.800 usec
DE        6.50 usec
TE        295.3 K
D1        2.00000000 sec
D11       0.03000000 sec
TDO       1
SFO1     100.6228298 MHz
NUC1      13C
P1        10.00 usec
SI        32768
SF        100.6127762 MHz
WDW       EM
SSB       0
LB        1.00 Hz
GB        0
PC        1.40
  
```

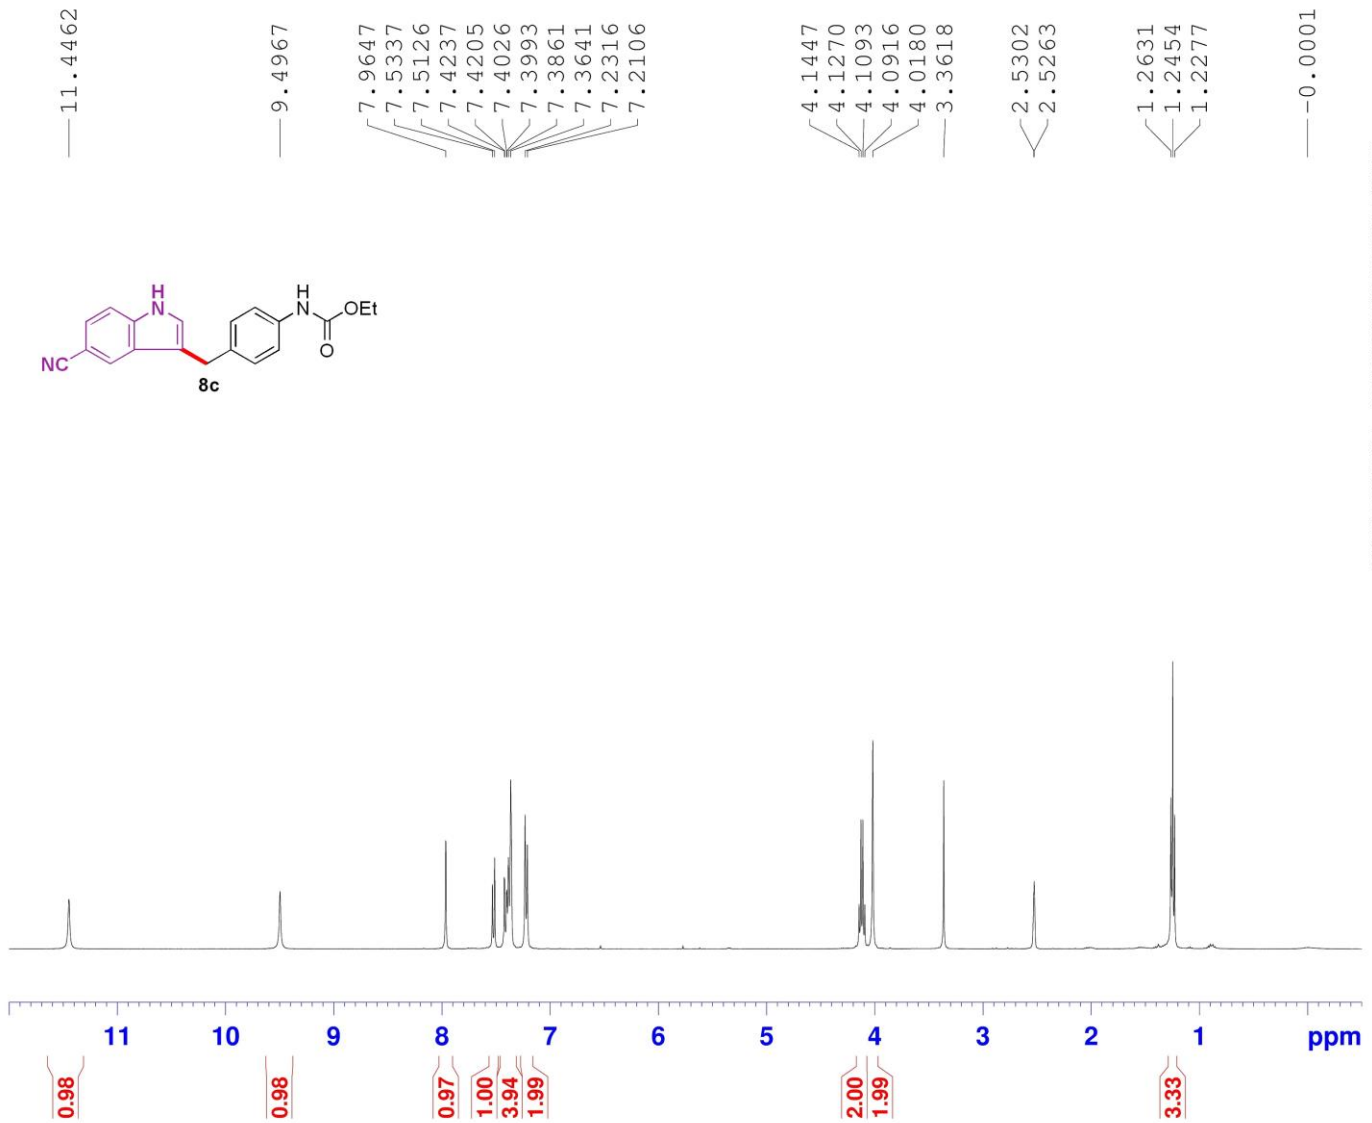

**BRUKER**

```

NAME      CLJ-WL-SZ131
EXPNO    1
PROCNO   1
Date_    20191217
Time     18.28
INSTRUM  spect
PROBHD   5 mm PABBO BB/
PULPROG  zg30
TD       65536
SOLVENT  DMSO
NS       8
DS       0
SWH      8012.820 Hz
FIDRES   0.122266 Hz
AQ       4.0894966 sec
RG       70.36
DW       62.400 usec
DE       6.50 usec
TE       300.7 K
D1       1.0000000 sec
TD0      1

----- CHANNEL f1 -----
SF01    400.1324710 MHz
NUC1     1H
P1       8.04 usec
SI       65536
SF       400.1299927 MHz
WDW      EM
SSB      0
LB       0.30 Hz
GB       0
PC       1.00

```



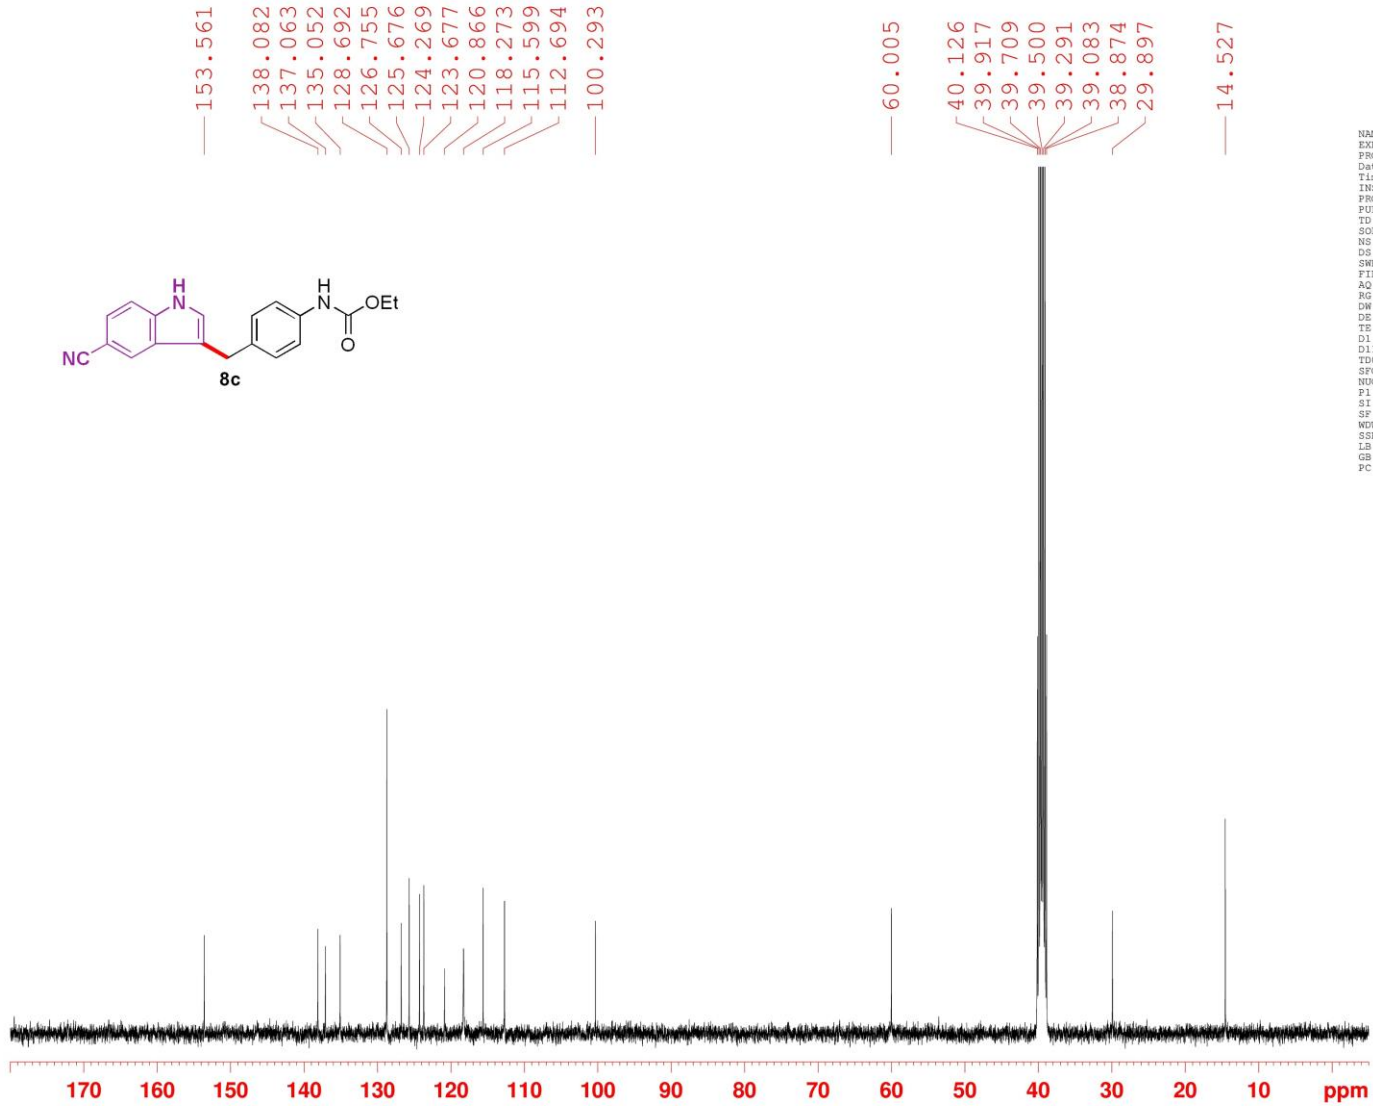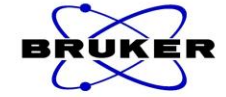

```

NAME      2019-12-20 shaohong-S2131
EXPNO     1
PROCNO    1
Date_     20191221
Time      22.09 h
INSTRUM   spect
PROBHD    z116098_0673 (
PULPROG   zgpg30
TD         65536
SOLVENT   DMSO
NS         256
DS         0
SWH        24038.461 Hz
FIDRES     0.733596 Hz
AQ          1.3631988 sec
RG          203.48
DW          20.800 usec
DE          6.50 usec
TE          298.1 K
D1          2.0000000 sec
D11         0.0300000 sec
TDD         1
SFO1       100.6228298 MHz
NUC1       13C
P1          10.00 usec
SI          32768
SF          100.6128155 MHz
WDW         EM
SSB         0
LB          1.00 Hz
GB          0
PC          1.40
  
```

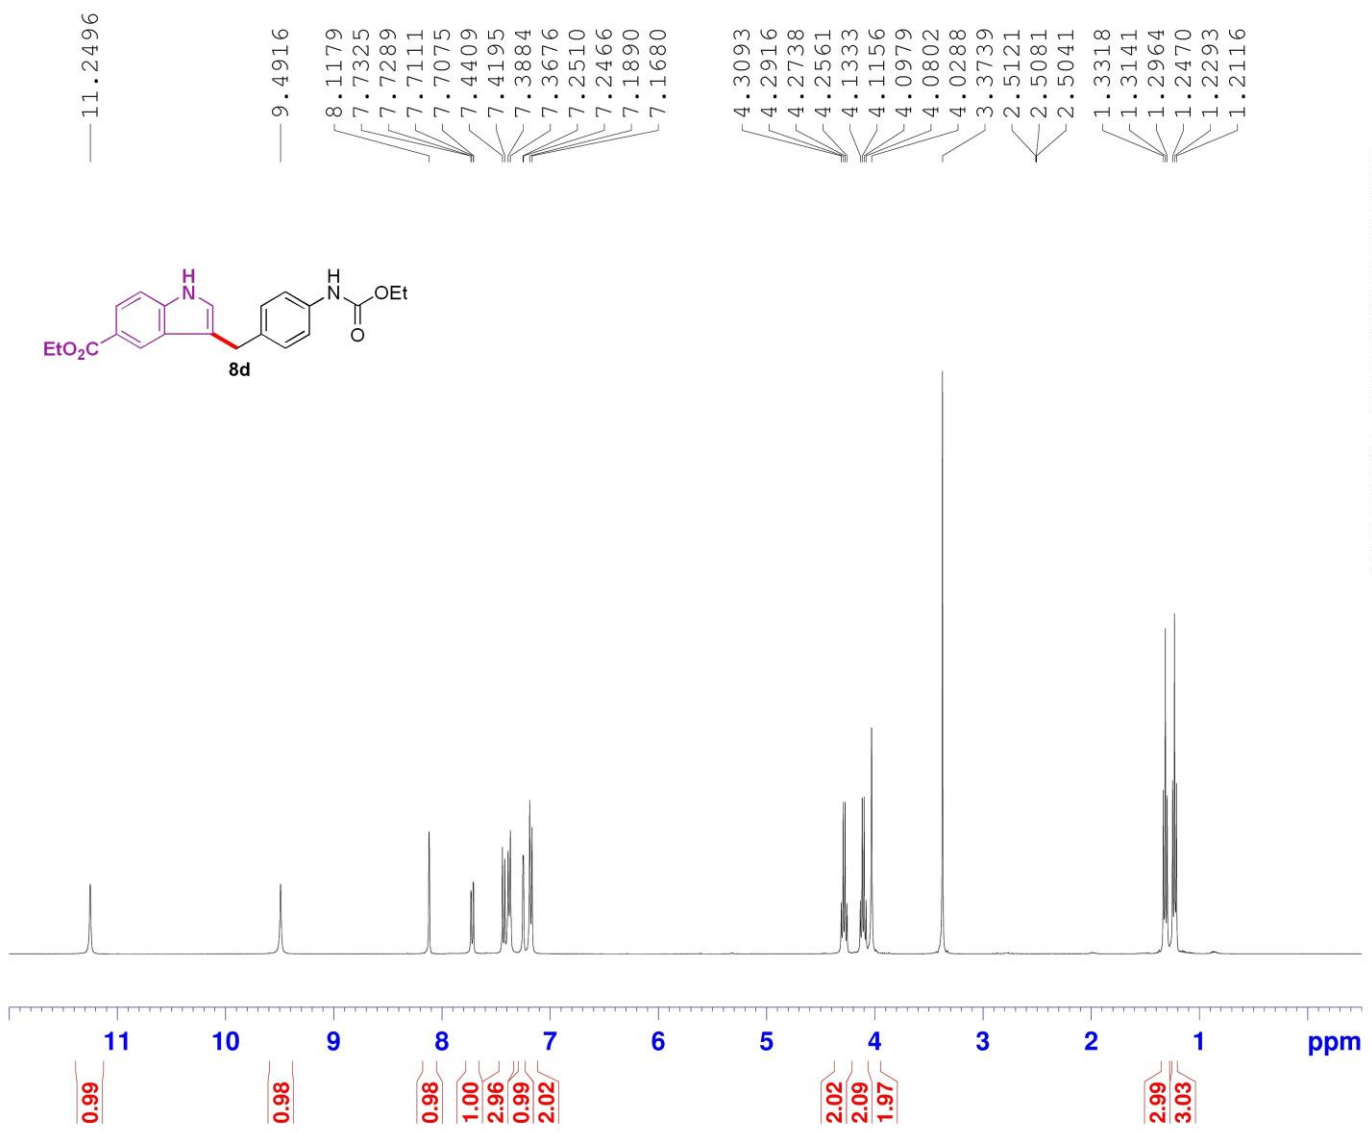

```

NAME      CLJ-WL-SZ141
EXPNO     1
PROCNO    1
Date_     20191225
Time      20.44
INSTRUM   spect
PROBHD    5 mm PABBO BB/
PULPROG   zg30
TD         65536
SOLVENT   DMSO
NS         8
DS         0
SWH        8012.820 Hz
FIDRES     0.122266 Hz
AQ         4.0894966 sec
RG         36.4
DW         62.400 usec
DE         6.50 usec
TE         300.6 K
D1         1.0000000 sec
TD0        1

----- CHANNEL f1 -----
SF01      400.1324710 MHz
NUC1       1H
P1         8.04 usec
SI         65536
SF         400.1300000 MHz
WDW        EM
SSB        0
LB         0.30 Hz
GB         0
PC         1.00

```

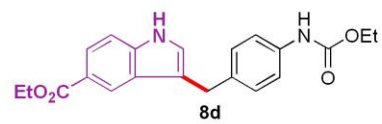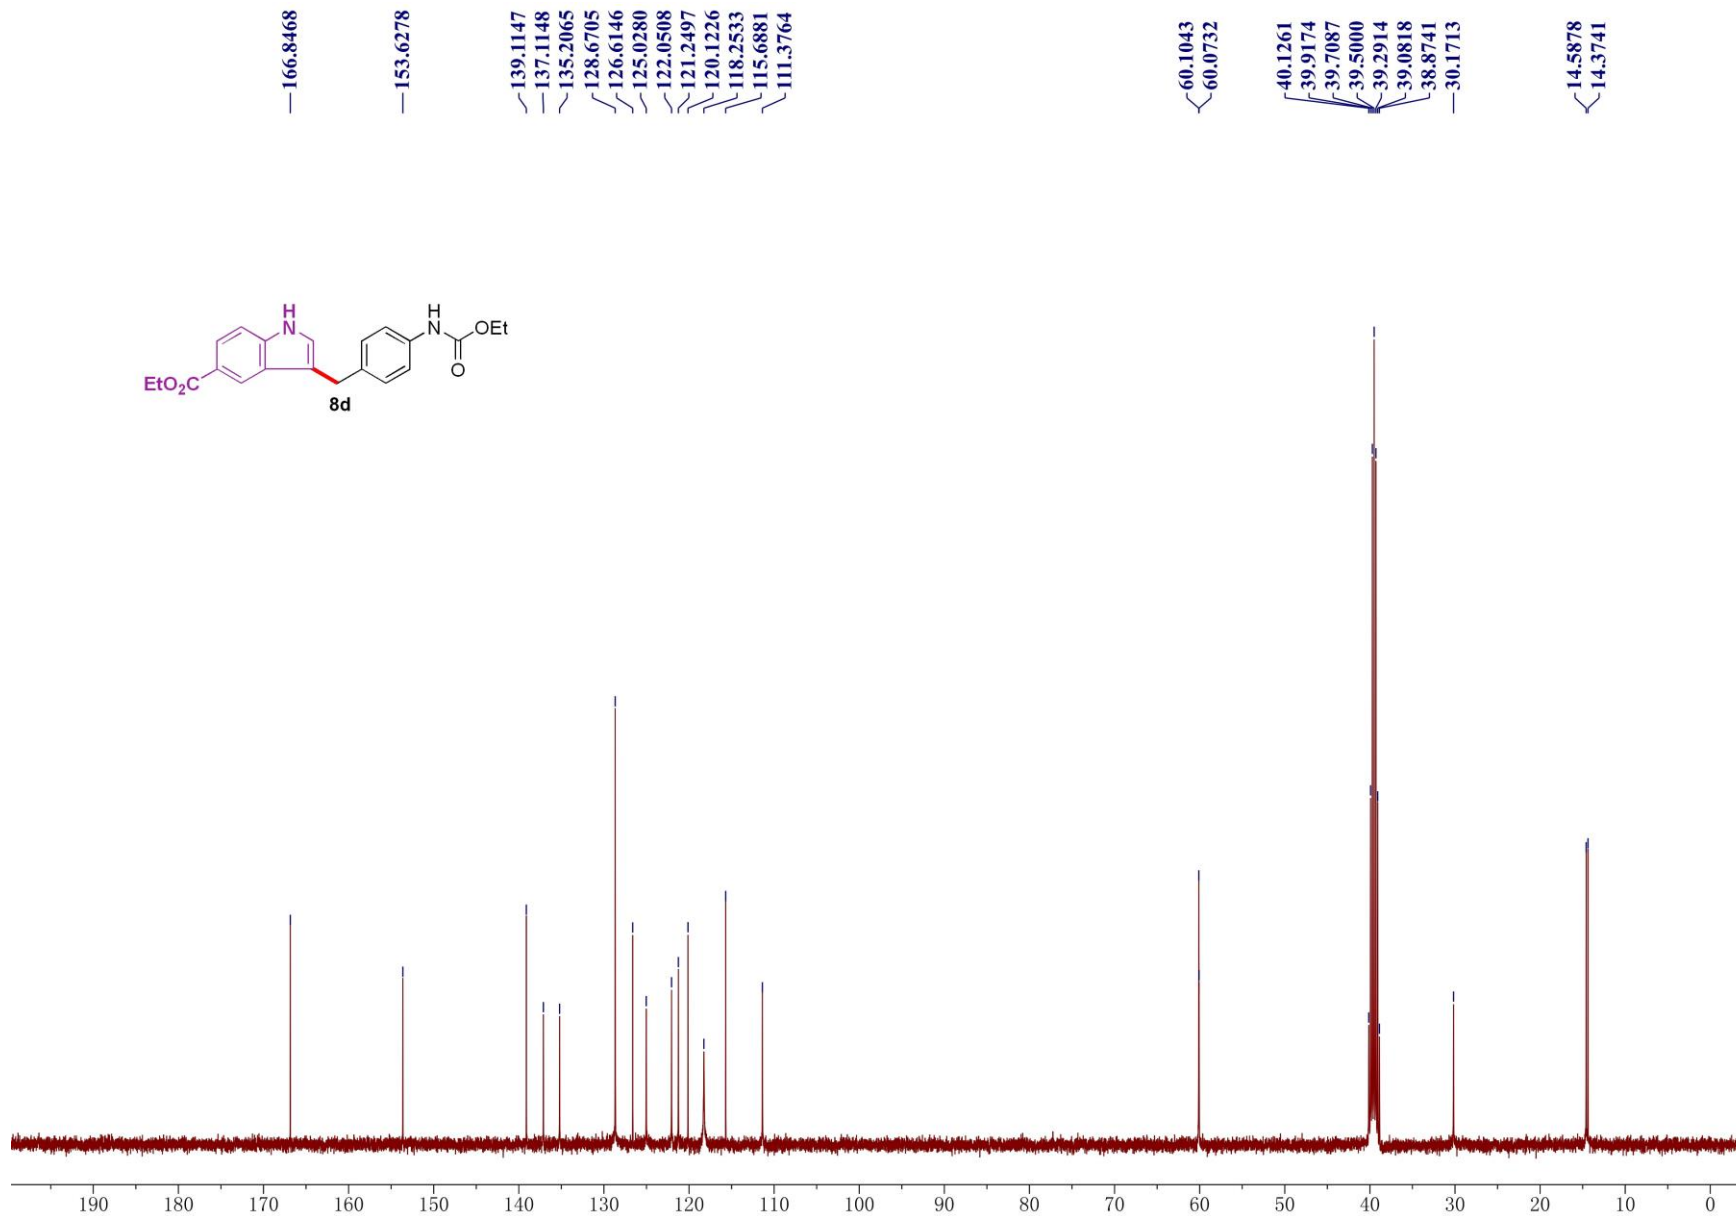

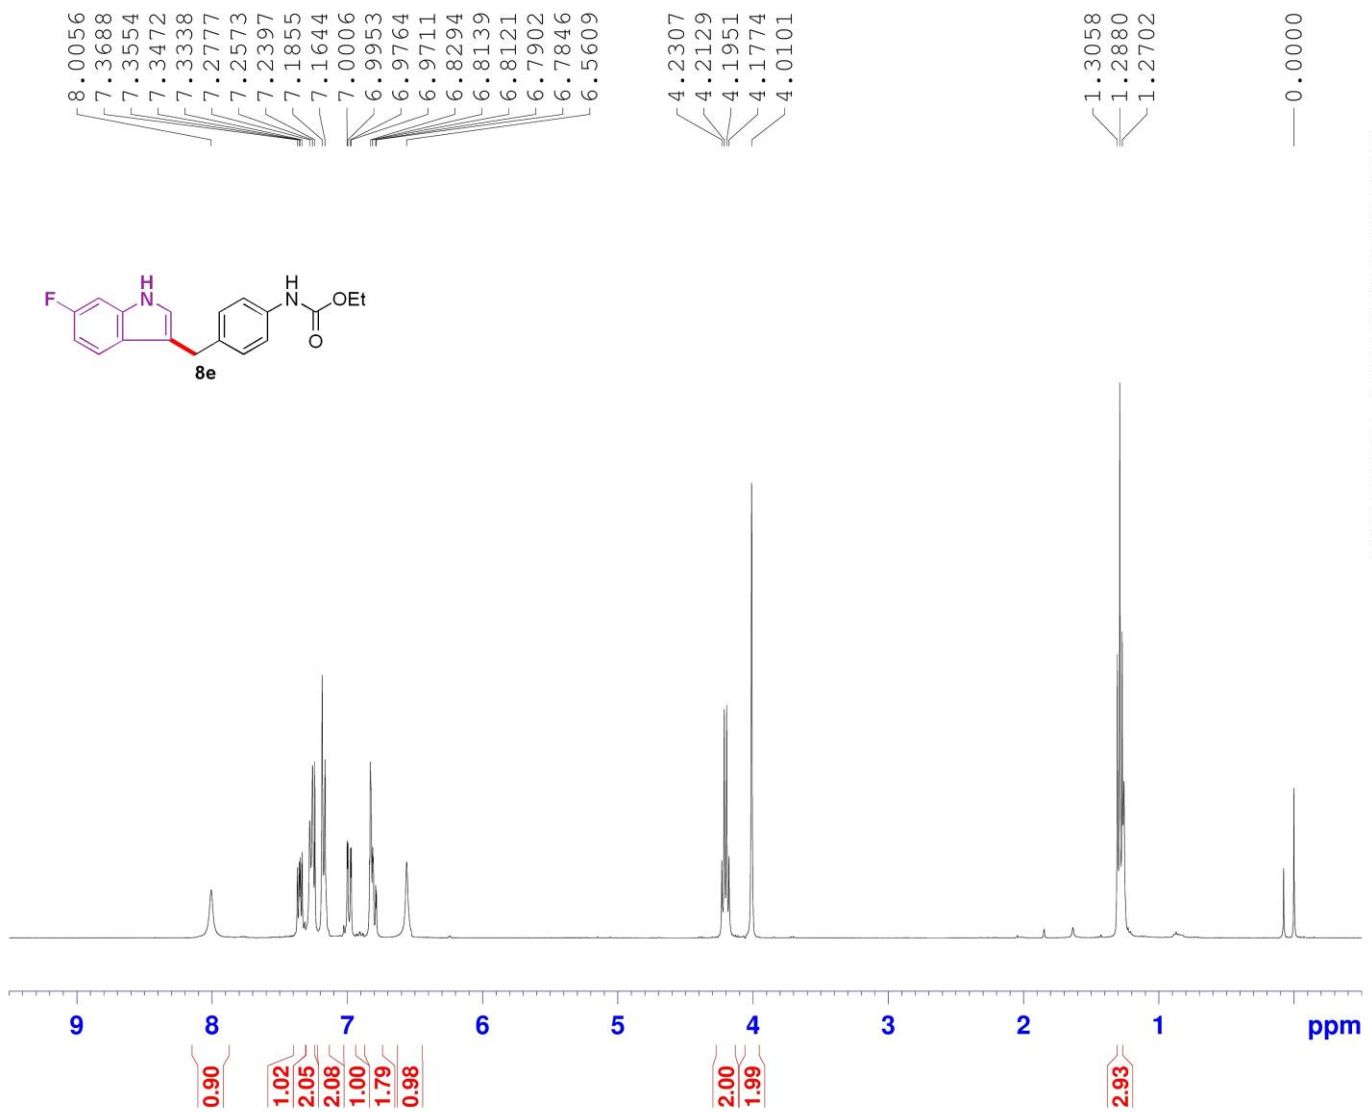

**BRUKER**

```

NAME      CLJ-WL-SZ128
EXPNO     1
PROCNO    1
Date_     20191213
Time      17.24
INSTRUM   spect
PROBHD    5 mm PABBO BB/
PULPROG   zg30
TD         65536
SOLVENT   CDCl3
NS         8
DS         0
SWH        8012.820 Hz
FIDRES     0.122266 Hz
AQ         4.0894966 sec
RG         70.36
DW         62.400 usec
DE         6.50 usec
TE         300.6 K
D1         1.0000000 sec
TD0        1

----- CHANNEL f1 -----
SF01      400.1324710 MHz
NUC1       1H
P1         8.04 usec
SI         65536
SF         400.1300175 MHz
WDW        EM
SSB        0
LB         0.30 Hz
GB         0
PC         1.00

```

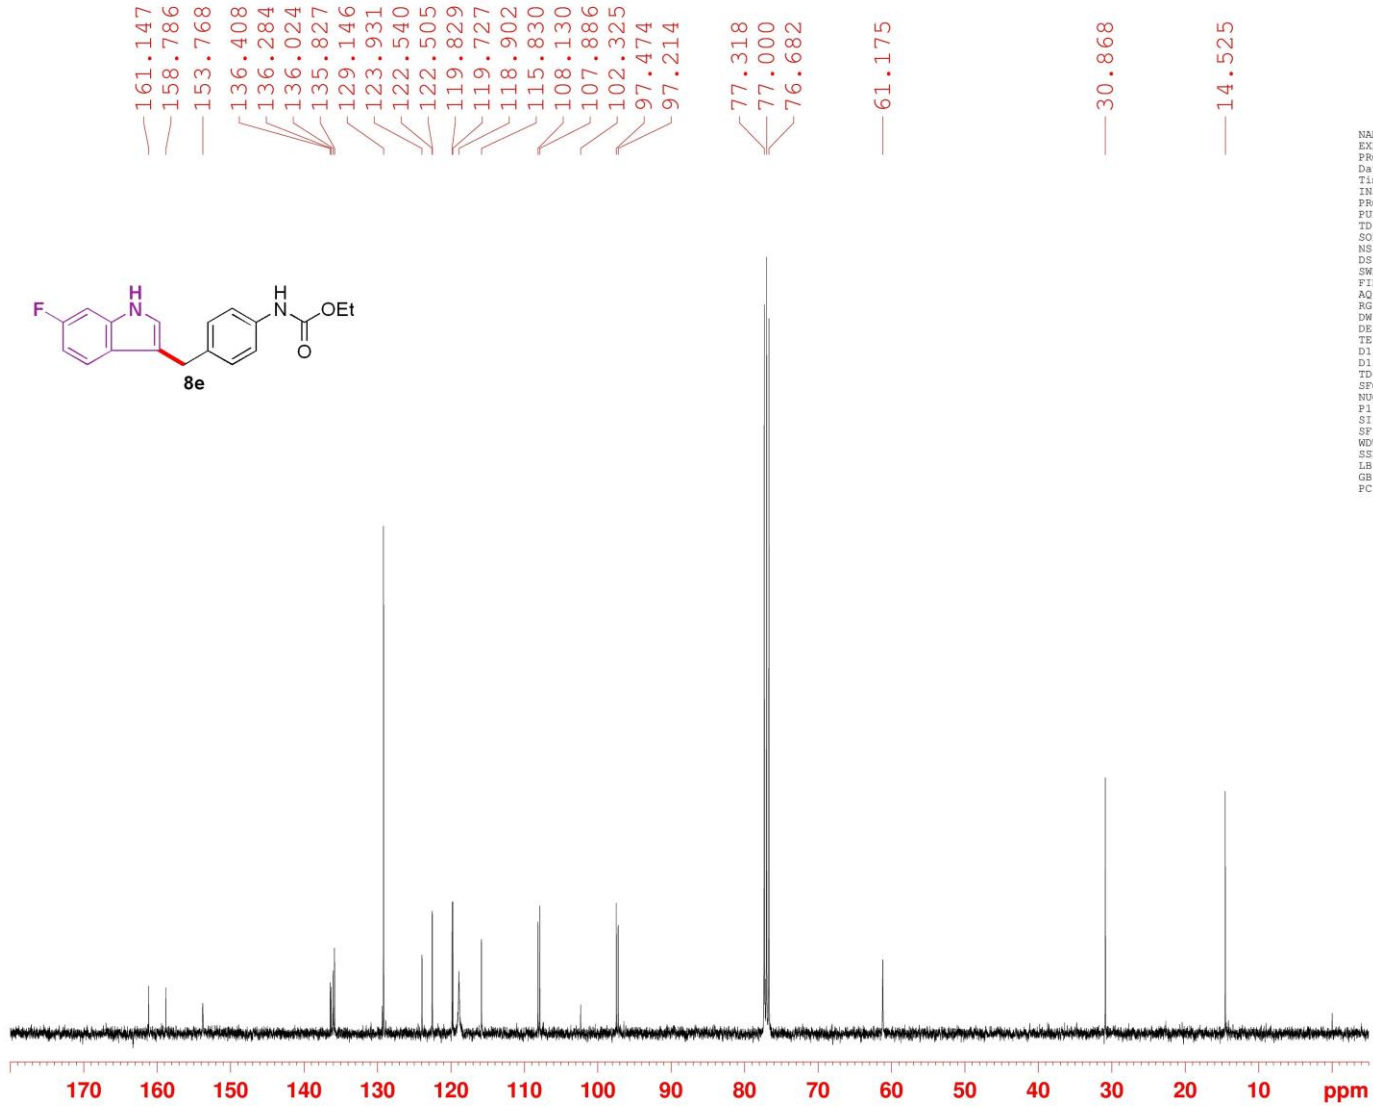

```

NAME      2019-12-20 shaozhong-128
EXPNO    1
PROCNO   1
Date_    20191220
Time     14.46 h
INSTRUM  spect
PROBHD   Z116098_0673 (
PULPROG  zgpg30
TD       65536
SOLVENT  CDCl3
NS       256
DS       4
SWH      24038.461 Hz
FIDRES   0.733596 Hz
AQ       1.3631988 sec
RG       203.48
DW       20.800 usec
DE       6.50 usec
TE       298.1 K
D1       2.00000000 sec
D11      0.03000000 sec
TDO      1
SFO1     100.6228298 MHz
NUC1     13C
P1       10.00 usec
SI       32768
SF       100.6127744 MHz
WDW      EM
SSB      0
LB       1.00 Hz
GB       0
PC       1.40
  
```

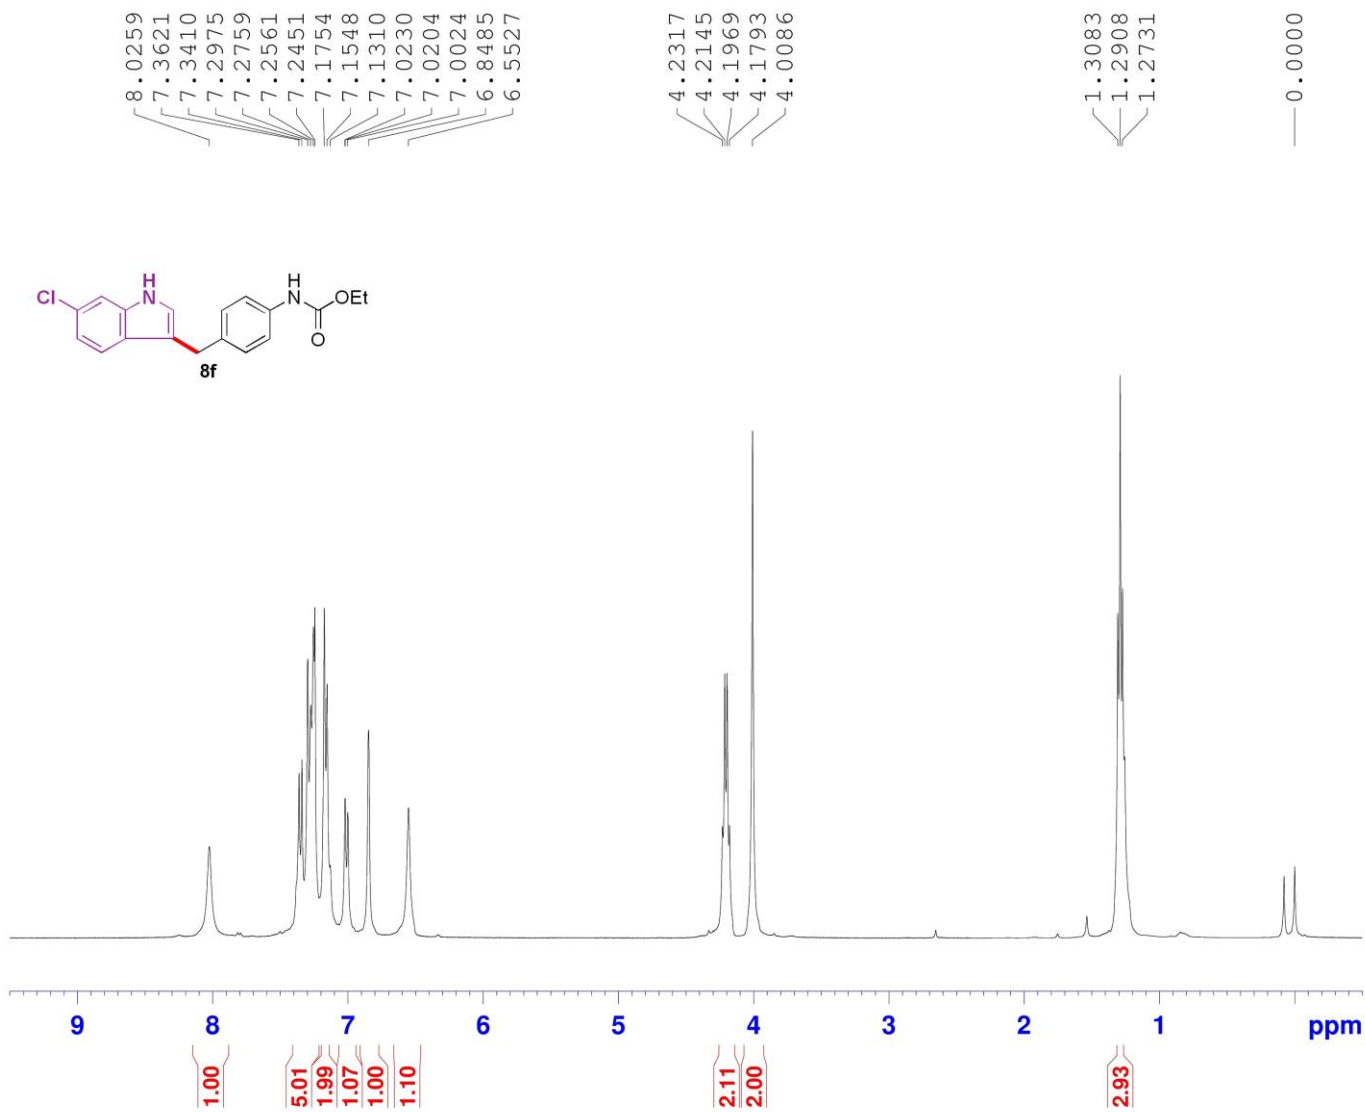

**BRUKER**

```

NAME      CLJ-WL-SZ129
EXPNO     1
PROCNO    1
Date_     20191216
Time      17.05
INSTRUM   spect
PROBHD    5 mm PABBO BB/
PULPROG   zg30
TD         65536
SOLVENT   CDCl3
NS         8
DS         0
SWH        8012.820 Hz
FIDRES     0.122266 Hz
AQ         4.0894966 sec
RG         70.36
DW         62.400 usec
DE         6.50 usec
TE         300.6 K
D1         1.00000000 sec
TD0        1

----- CHANNEL f1 -----
SF01      400.1324710 MHz
NUC1       1H
P1         8.04 usec
SI         65536
SF         400.1300160 MHz
WDW        EM
SSB        0
LB         0.30 Hz
GB         0
PC         1.00

```

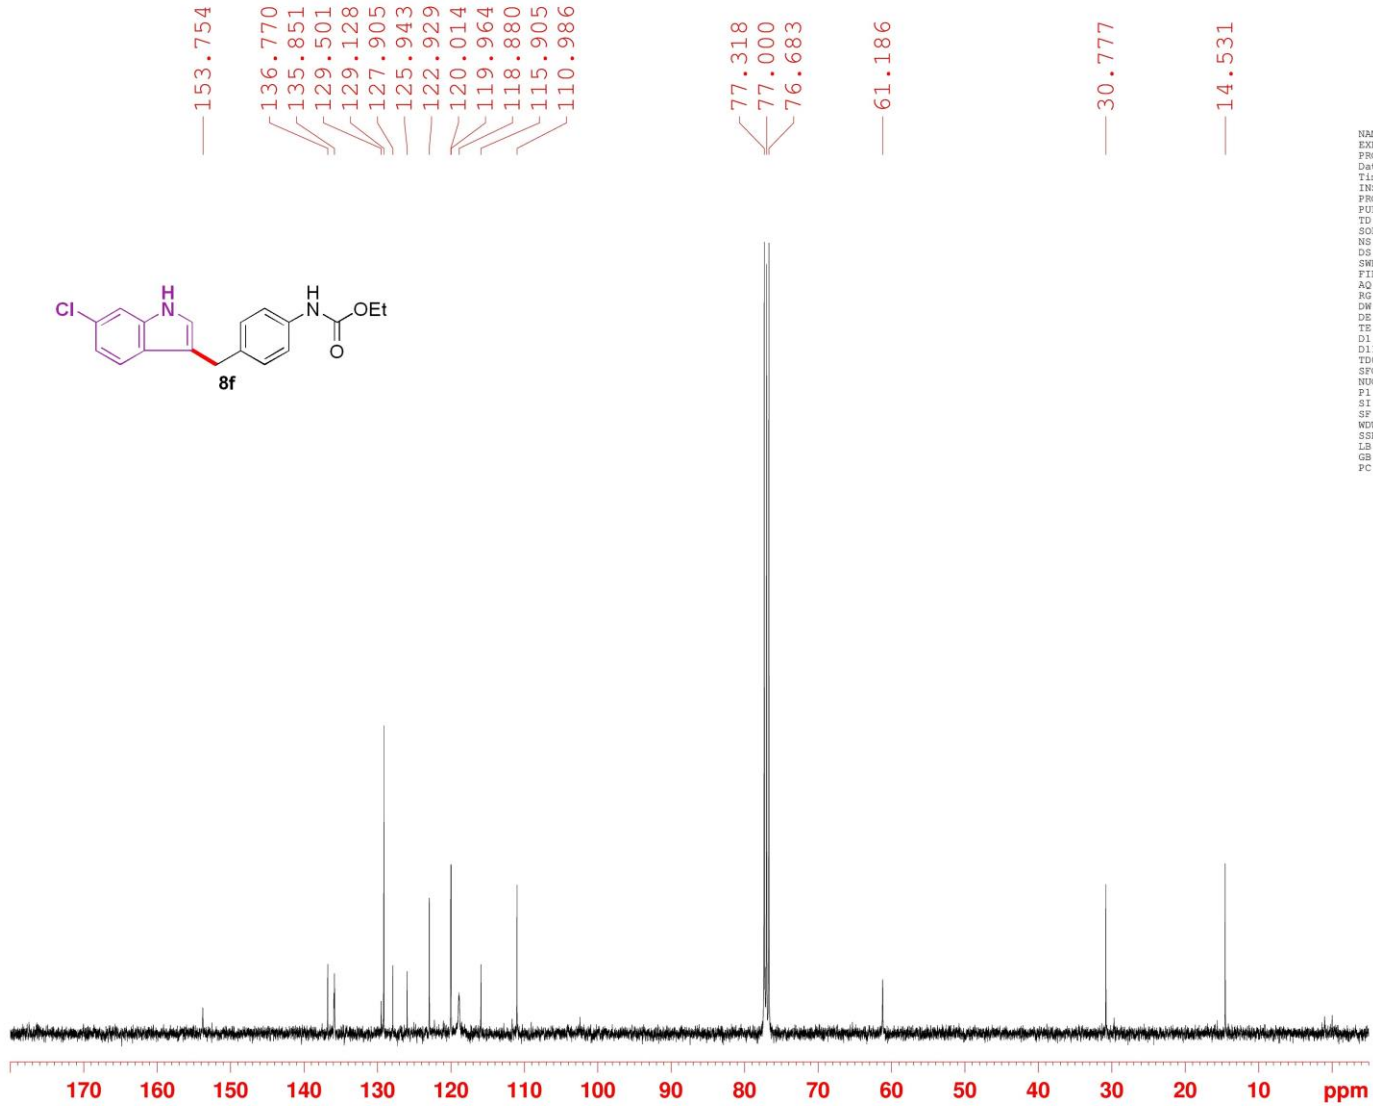

```

NAME      2019-12-20 shaohong-S2129
EXPNO     1
PROCNO    1
Date_     20191221
Time      22.30 h
INSTRUM   spect
PROBHD    z116098_0673 (
PULPROG   zgpg30
TD         65536
SOLVENT   CDCl3
NS         256
DS         0
SNI       24038.461 Hz
FIDRES    0.733596 Hz
AQ         1.3631988 sec
RG         203.48
DW         20.800 usec
DE         6.50 usec
TE         298.2 K
D1         2.0000000 sec
D11        0.0300000 sec
TDO        1
SFO1      100.6228298 MHz
NUC1       13C
P1         10.00 usec
SI         32768
SF         100.6127740 MHz
WDW        EM
SGB        0
LB         1.00 Hz
GB         0
PC         1.40
  
```

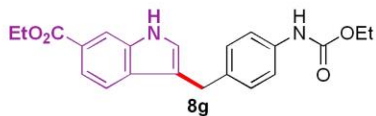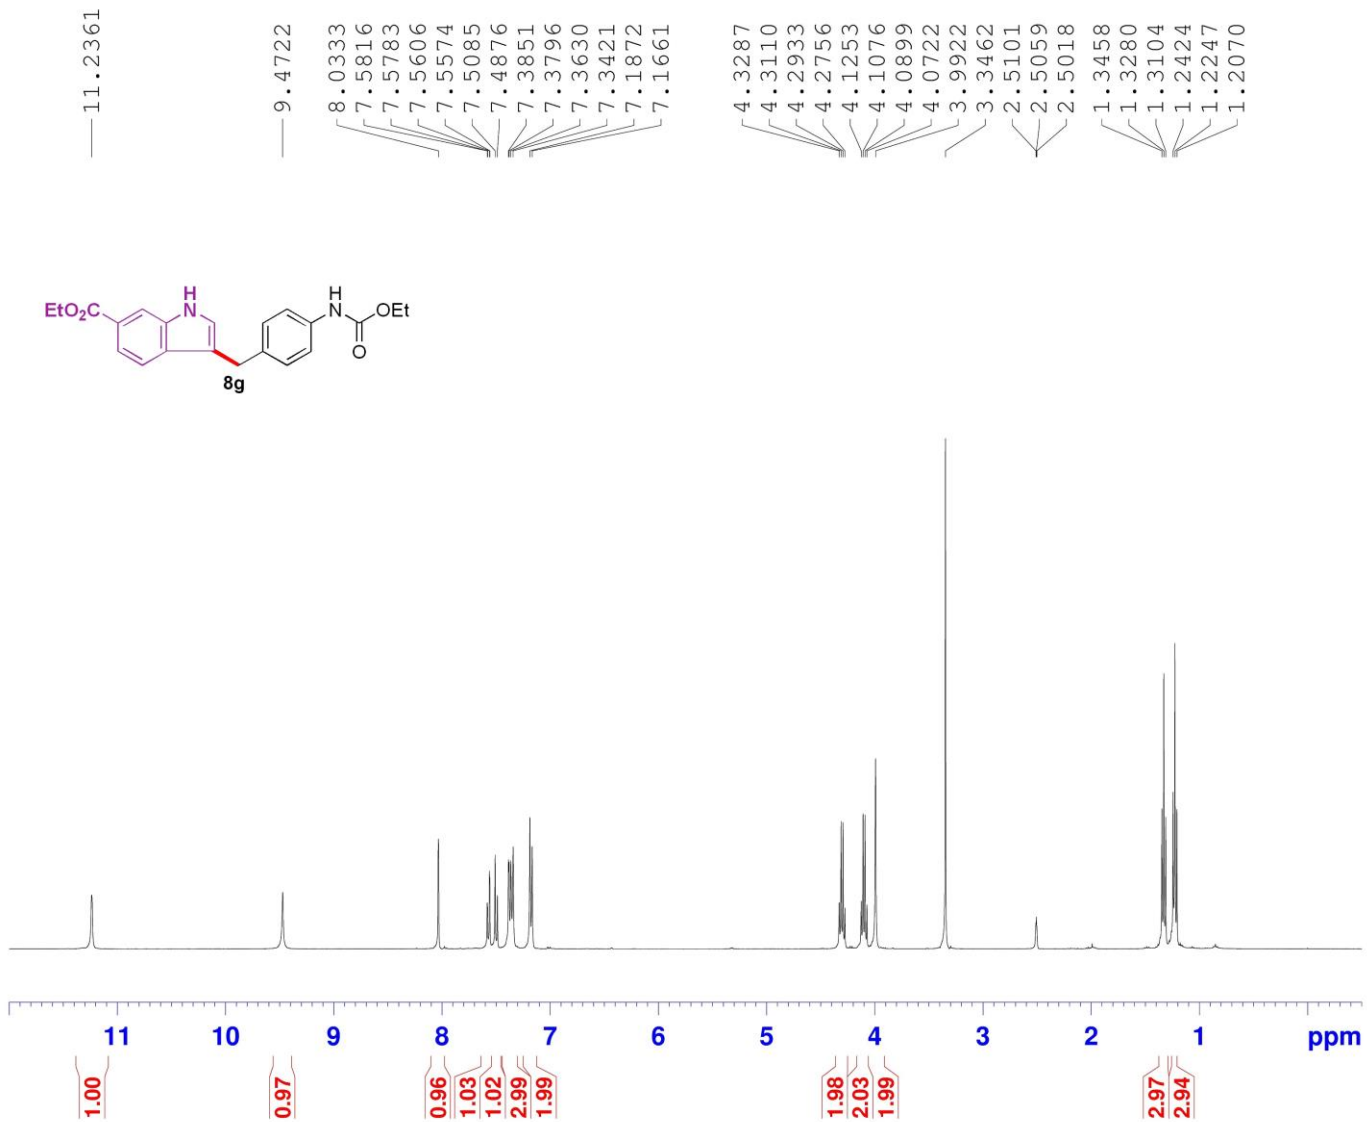

```

NAME      CLJ-WL-SZ140
EXPNO     1
PROCNO    1
Date_     20191225
Time      20.40
INSTRUM   spect
PROBHD    5 mm PABBO BB/
PULPROG   zg30
TD         65536
SOLVENT   DMSO
NS         8
DS         0
SWH       8012.820 Hz
FIDRES    0.122266 Hz
AQ         4.0894966 sec
RG         51.19
DW         62.400 usec
DE         6.50 usec
TE         300.6 K
D1         1.00000000 sec
TD0        1
  
```

```

----- CHANNEL f1 -----
SF01    400.1324710 MHz
NUC1     1H
P1       8.04 usec
SI       65536
SF       400.1300009 MHz
WDW      EM
SSB      0
LB       0.30 Hz
GB       0
PC       1.00
  
```



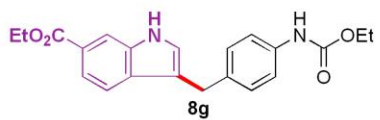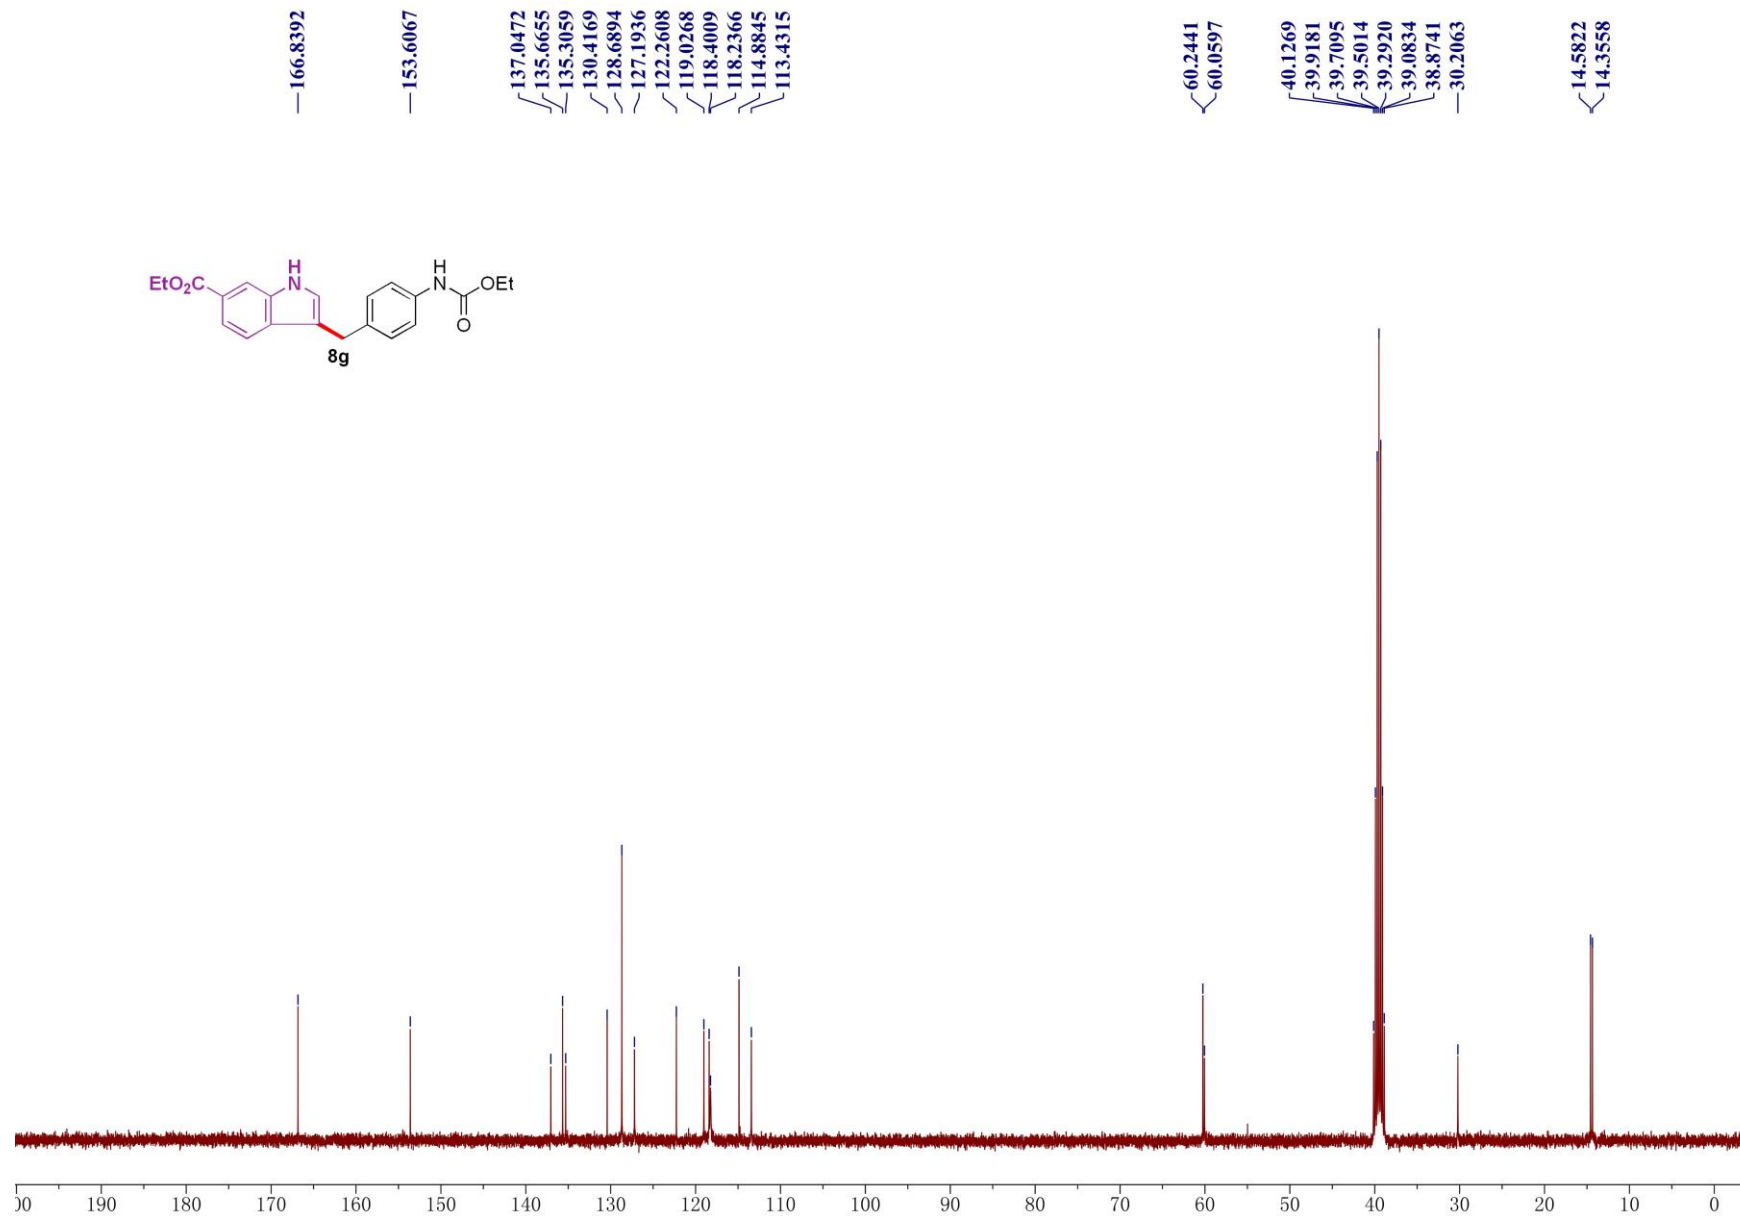

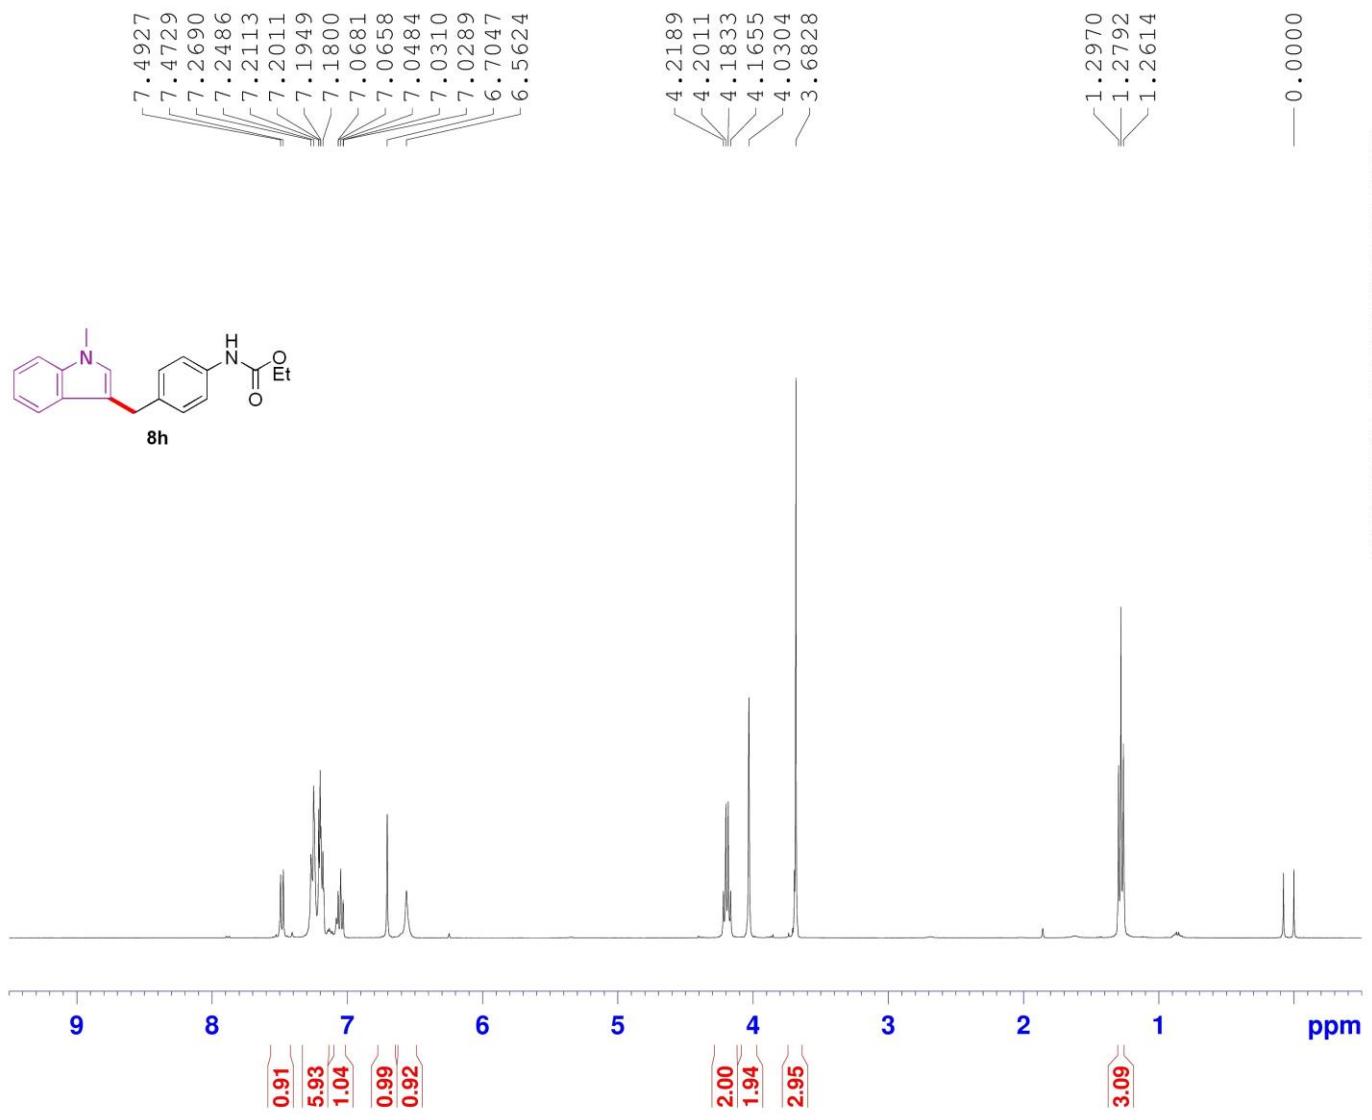

**BRUKER**

```

NAME      CLJ-WL-S2127
EXPNO     1
PROCNO    1
Date_     20191212
Time      17.54
INSTRUM   spect
PROBHD    5 mm PABBO BB/
PULPROG   zg30
TD         65536
SOLVENT   CDCl3
NS         8
DS         0
SWH        8012.820 Hz
FIDRES     0.122266 Hz
AQ         4.0894966 sec
RG         36.4
DW         62.400 usec
DE         6.50 usec
TE         300.6 K
D1         1.0000000 sec
TD0        1

----- CHANNEL f1 -----
SF01      400.1324710 MHz
NUC1       1H
P1         8.04 usec
SI         65536
SF         400.1300288 MHz
WDW        EM
SSB        0
LB         0.30 Hz
GB         0
PC         1.00

```

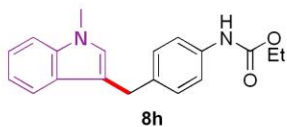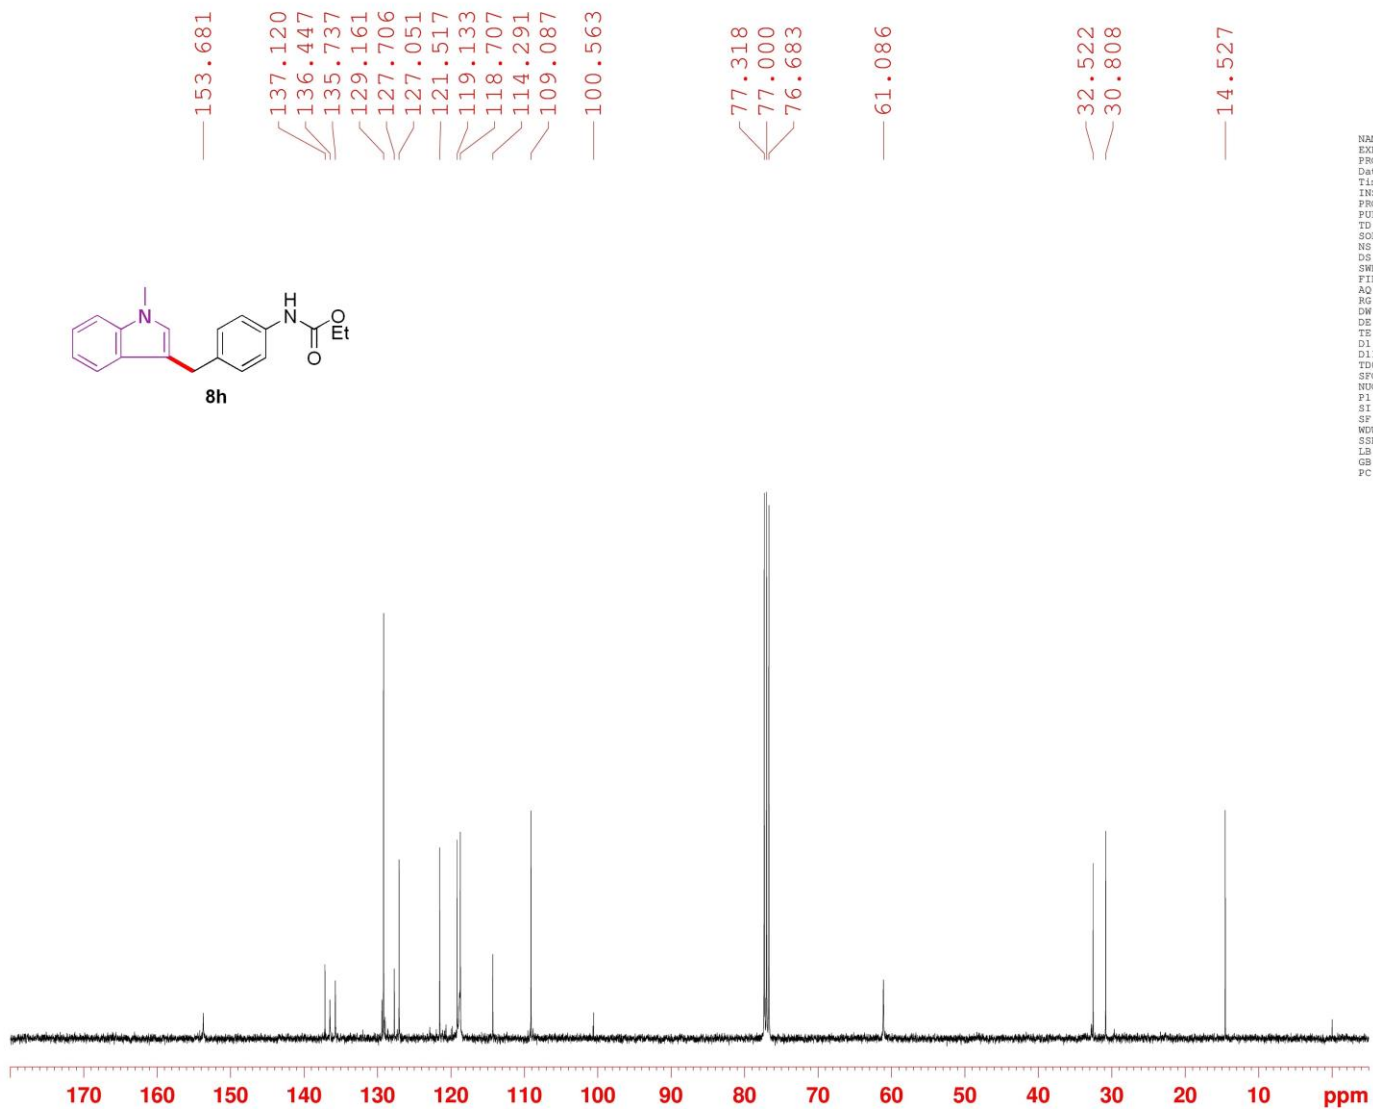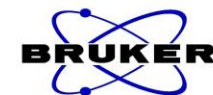

```

NAME      2019-12-17 shaozhong-S2127
EXPNO    1
PROCNO   1
Date_    20191218
Time     4.32 h
INSTRUM  spect
PROBHD   z116098_0673 (
PULPROG  zgpg30
TD       65536
SOLVENT  CDCl3
NS       256
DS       4
SWH      24038.461 Hz
FIDRES   0.733596 Hz
AQ       1.3631988 sec
RG       203.48
DW       20.800 usec
DE       6.50 usec
TE       298.2 K
D1       2.0000000 sec
D11      0.0300000 sec
TDO      1
SFO1     100.6228298 MHz
NUC1     13C
P1       10.00 usec
SI       32768
SF       100.6127775 MHz
WDW      EM
SSB      0
LB       1.00 Hz
GB       0
PC       1.40
  
```

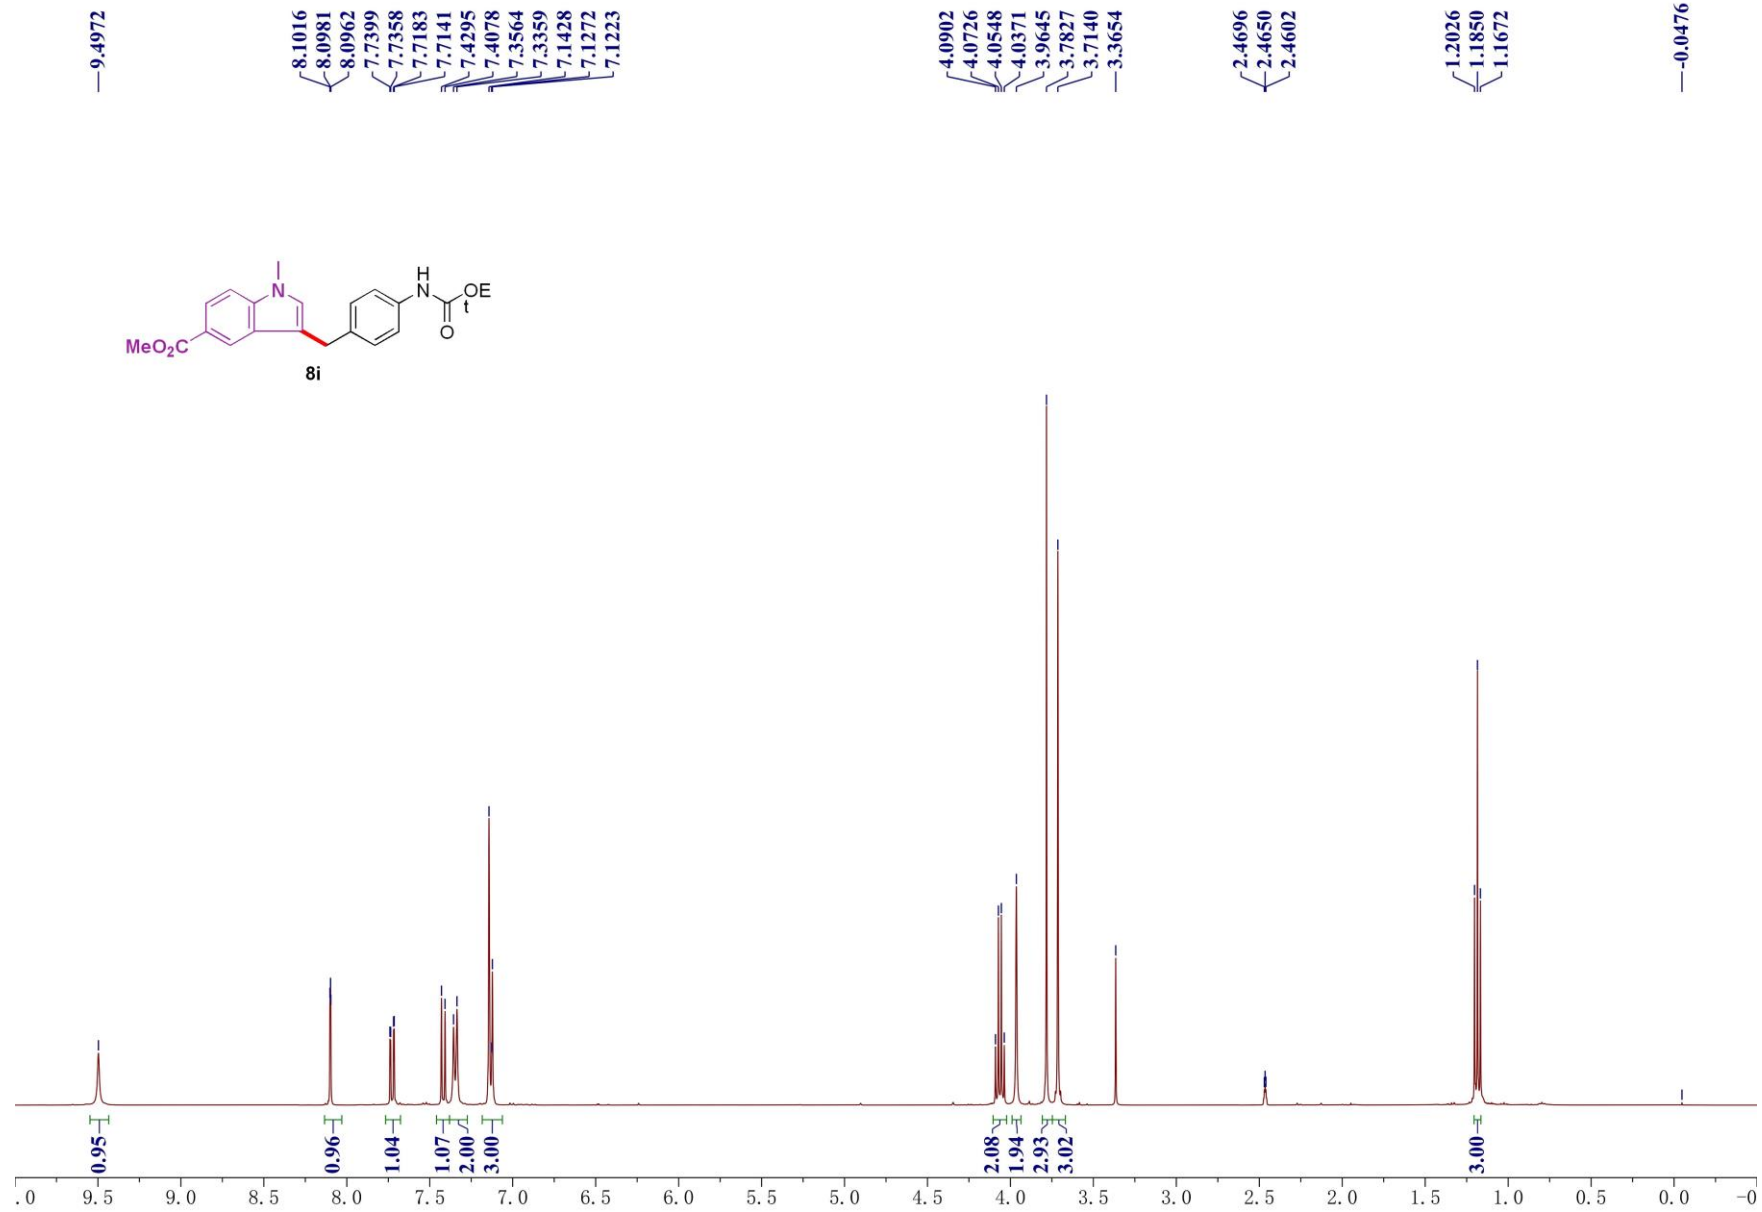

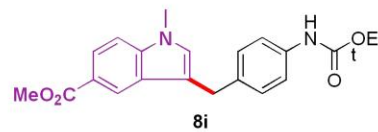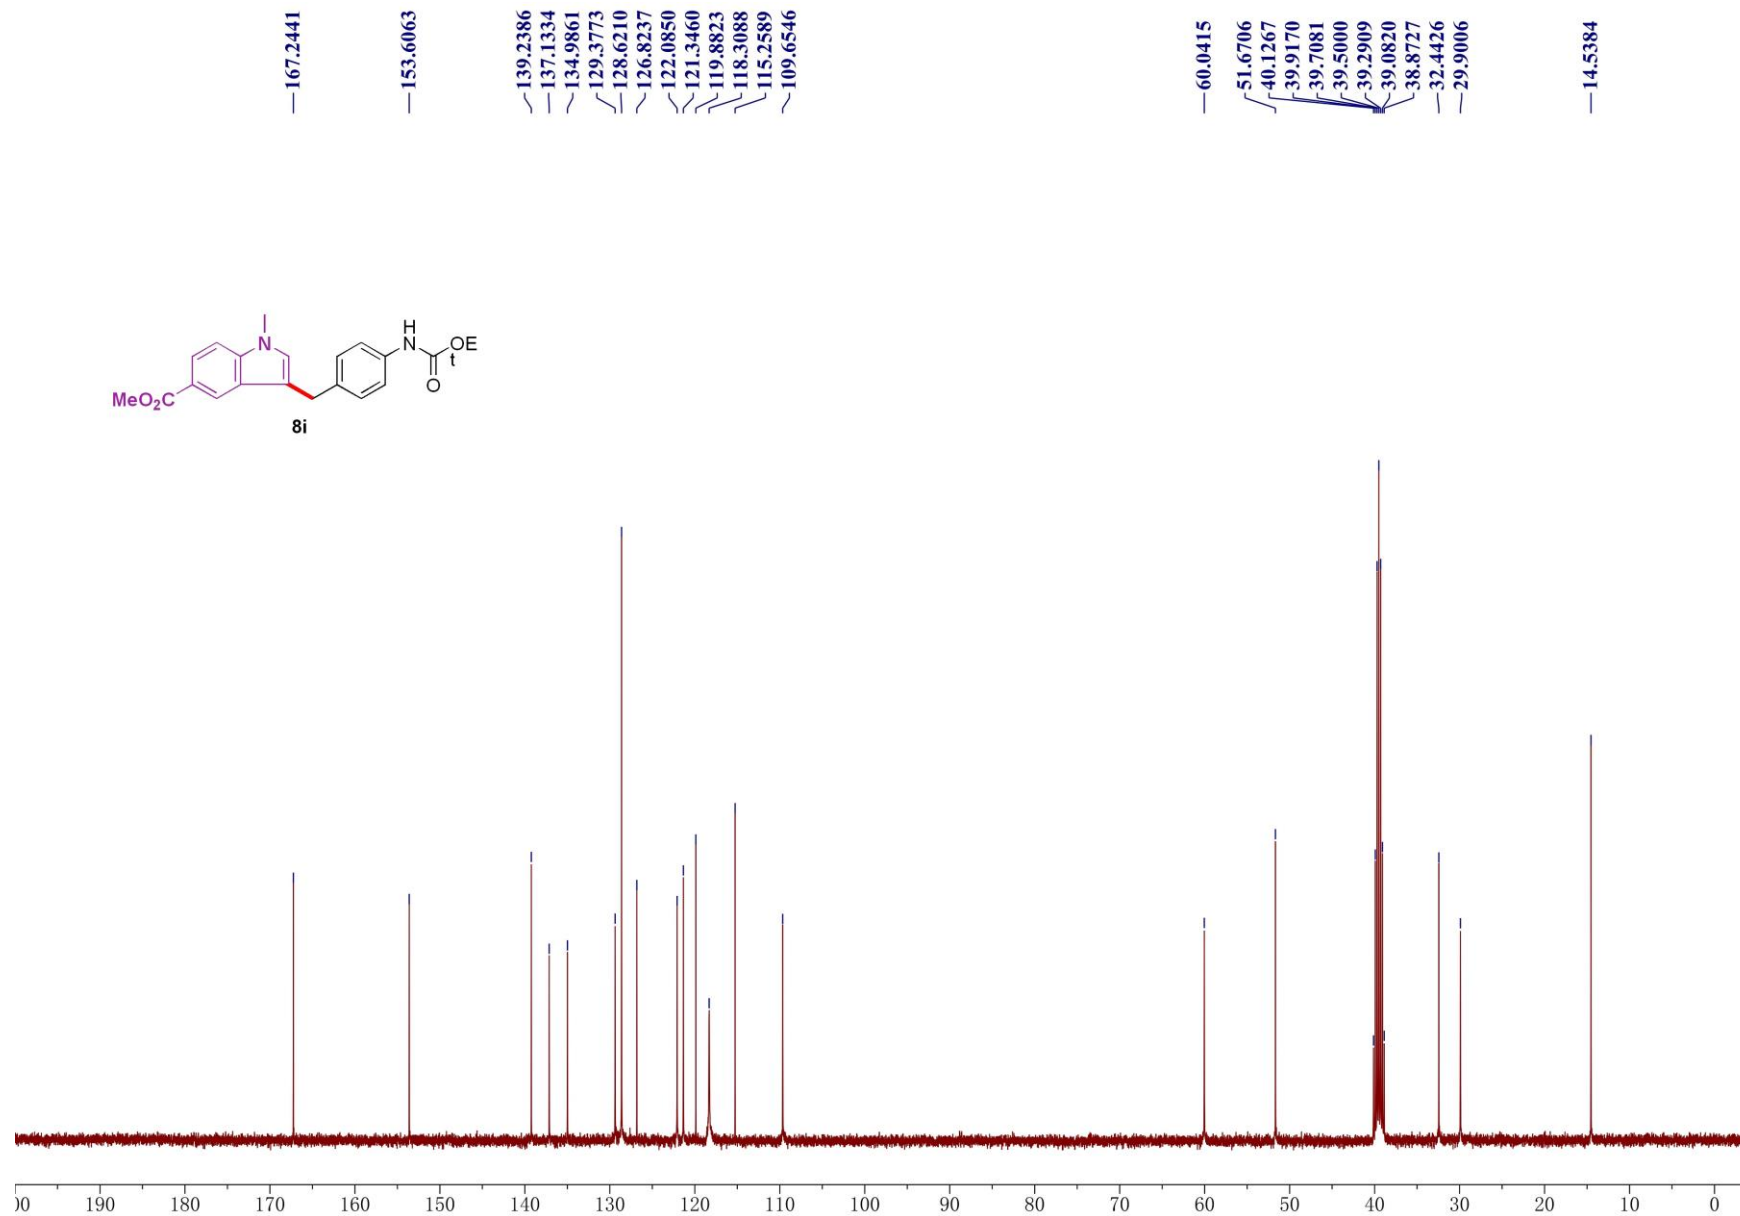

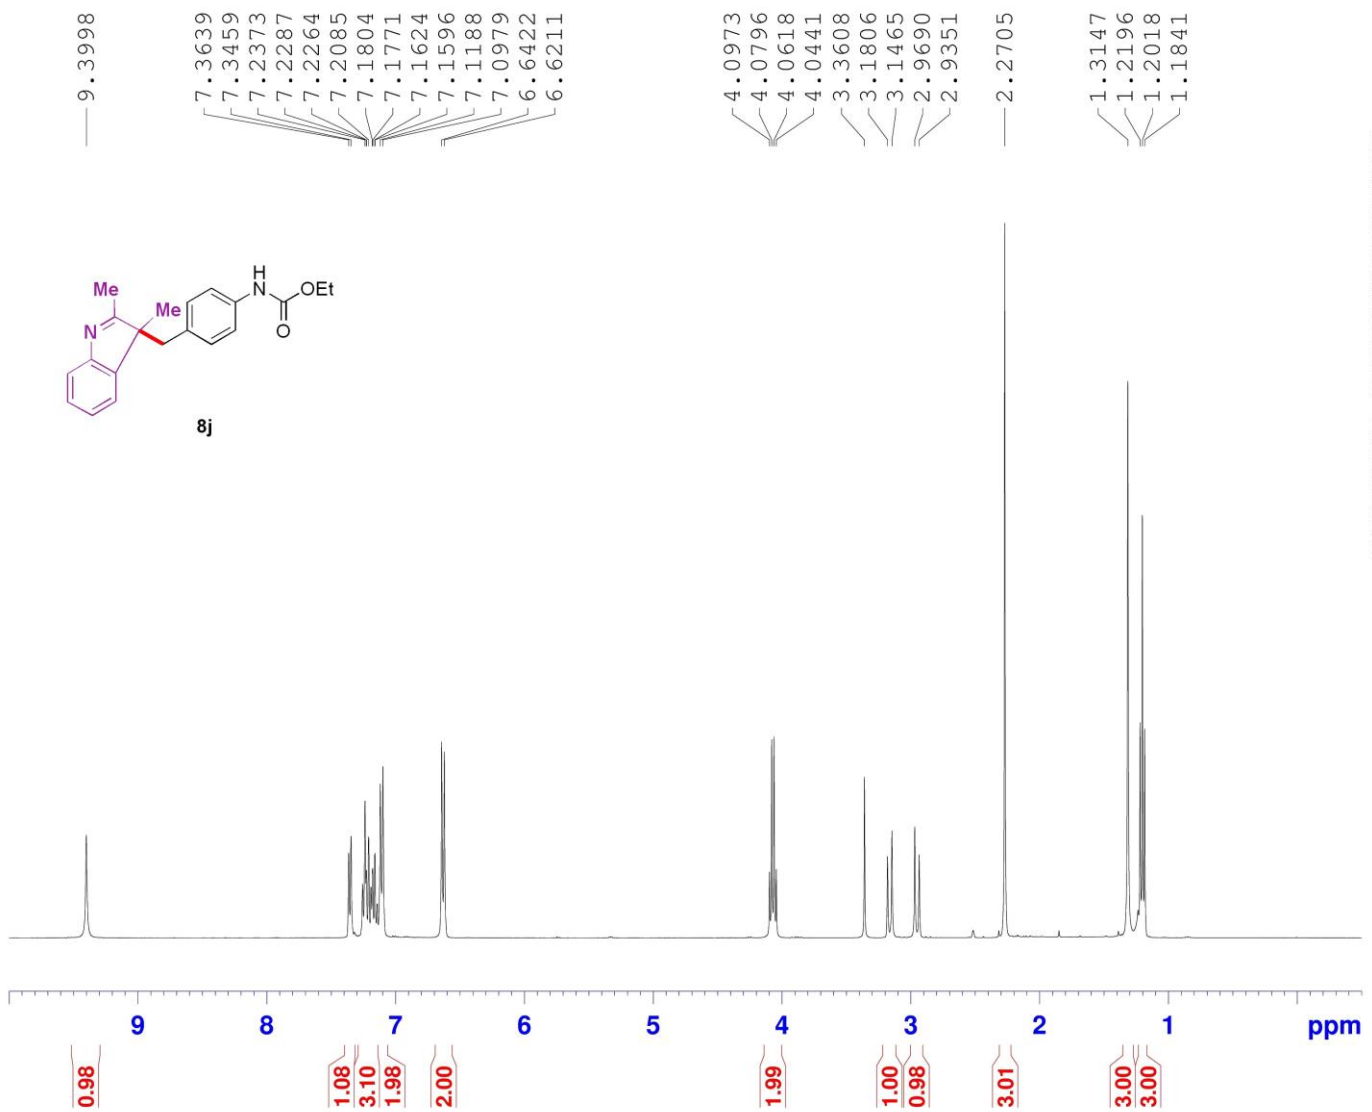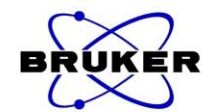

```

NAME      CLJ-WL-SZ143
EXPNO     1
PROCNO    1
Date_     20191230
Time      18.24
INSTRUM   spect
PROBHD    5 mm PABBO BB/
PULPROG   zg30
TD         65536
SOLVENT   DMSO
NS         8
DS         0
SWH       8012.820 Hz
FIDRES    0.122266 Hz
AQ         4.0894966 sec
RG         32.77
DW         62.400 usec
DE         6.50 usec
TE         300.6 K
D1         1.0000000 sec
TD0        1

----- CHANNEL f1 -----
SF01      400.1324710 MHz
NUC1       1H
P1         8.04 usec
SI         65536
SF         400.1300000 MHz
WDW        EM
SSB        0
LB         0.30 Hz
GB         0
PC         1.00

```

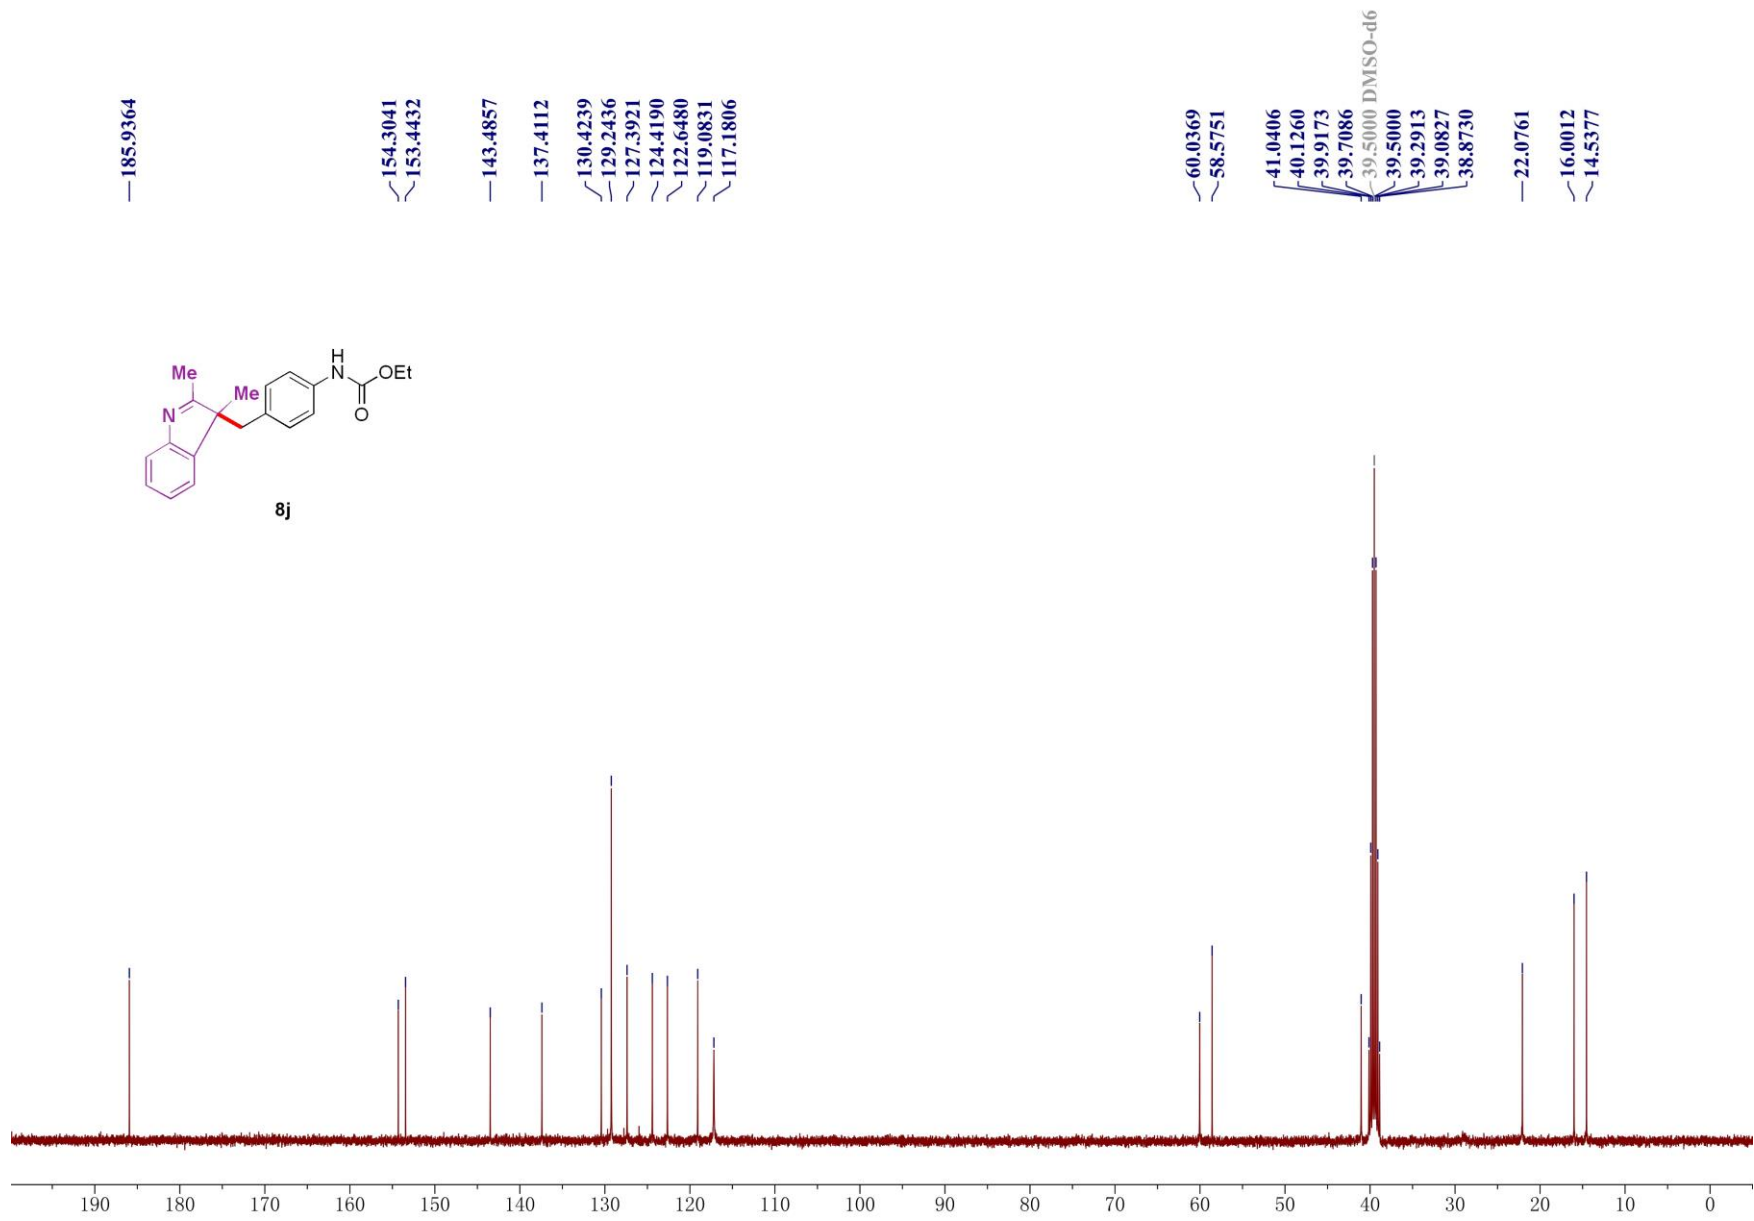

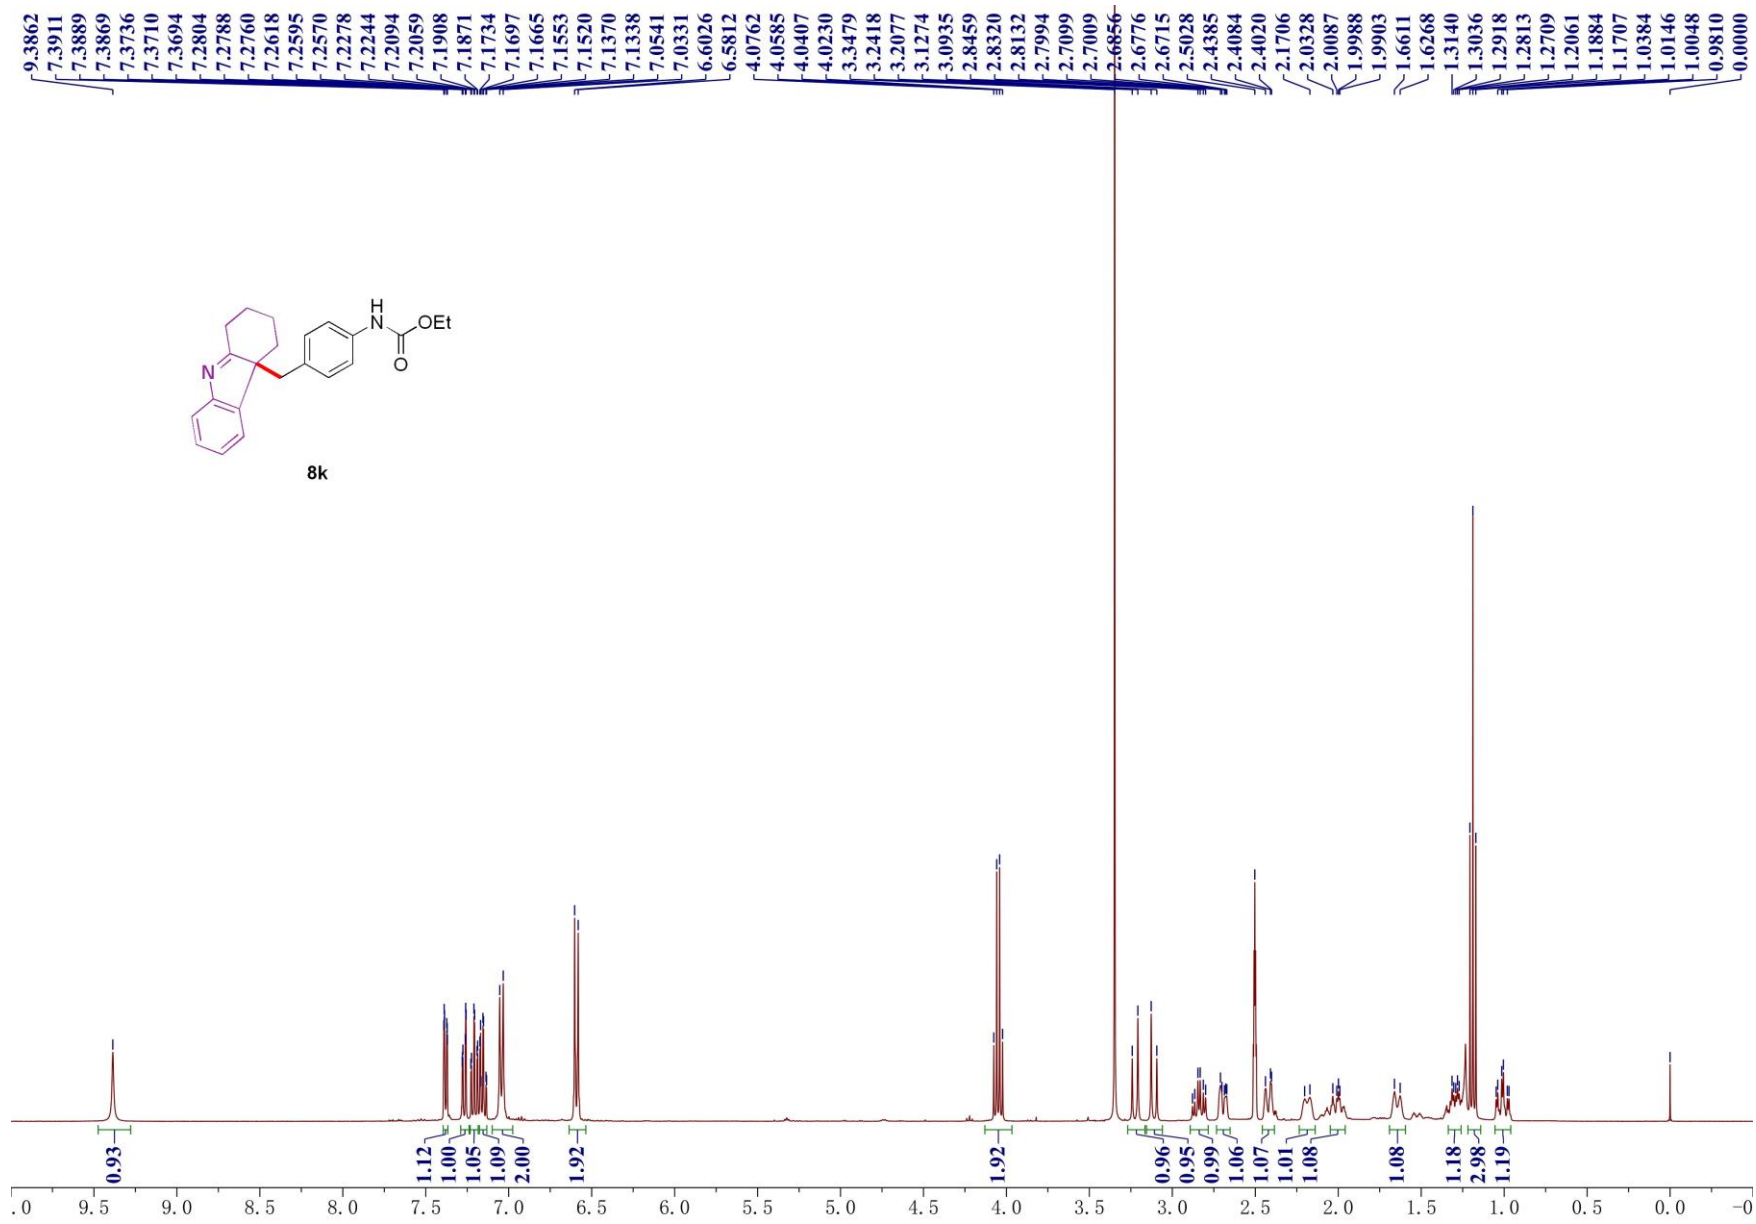



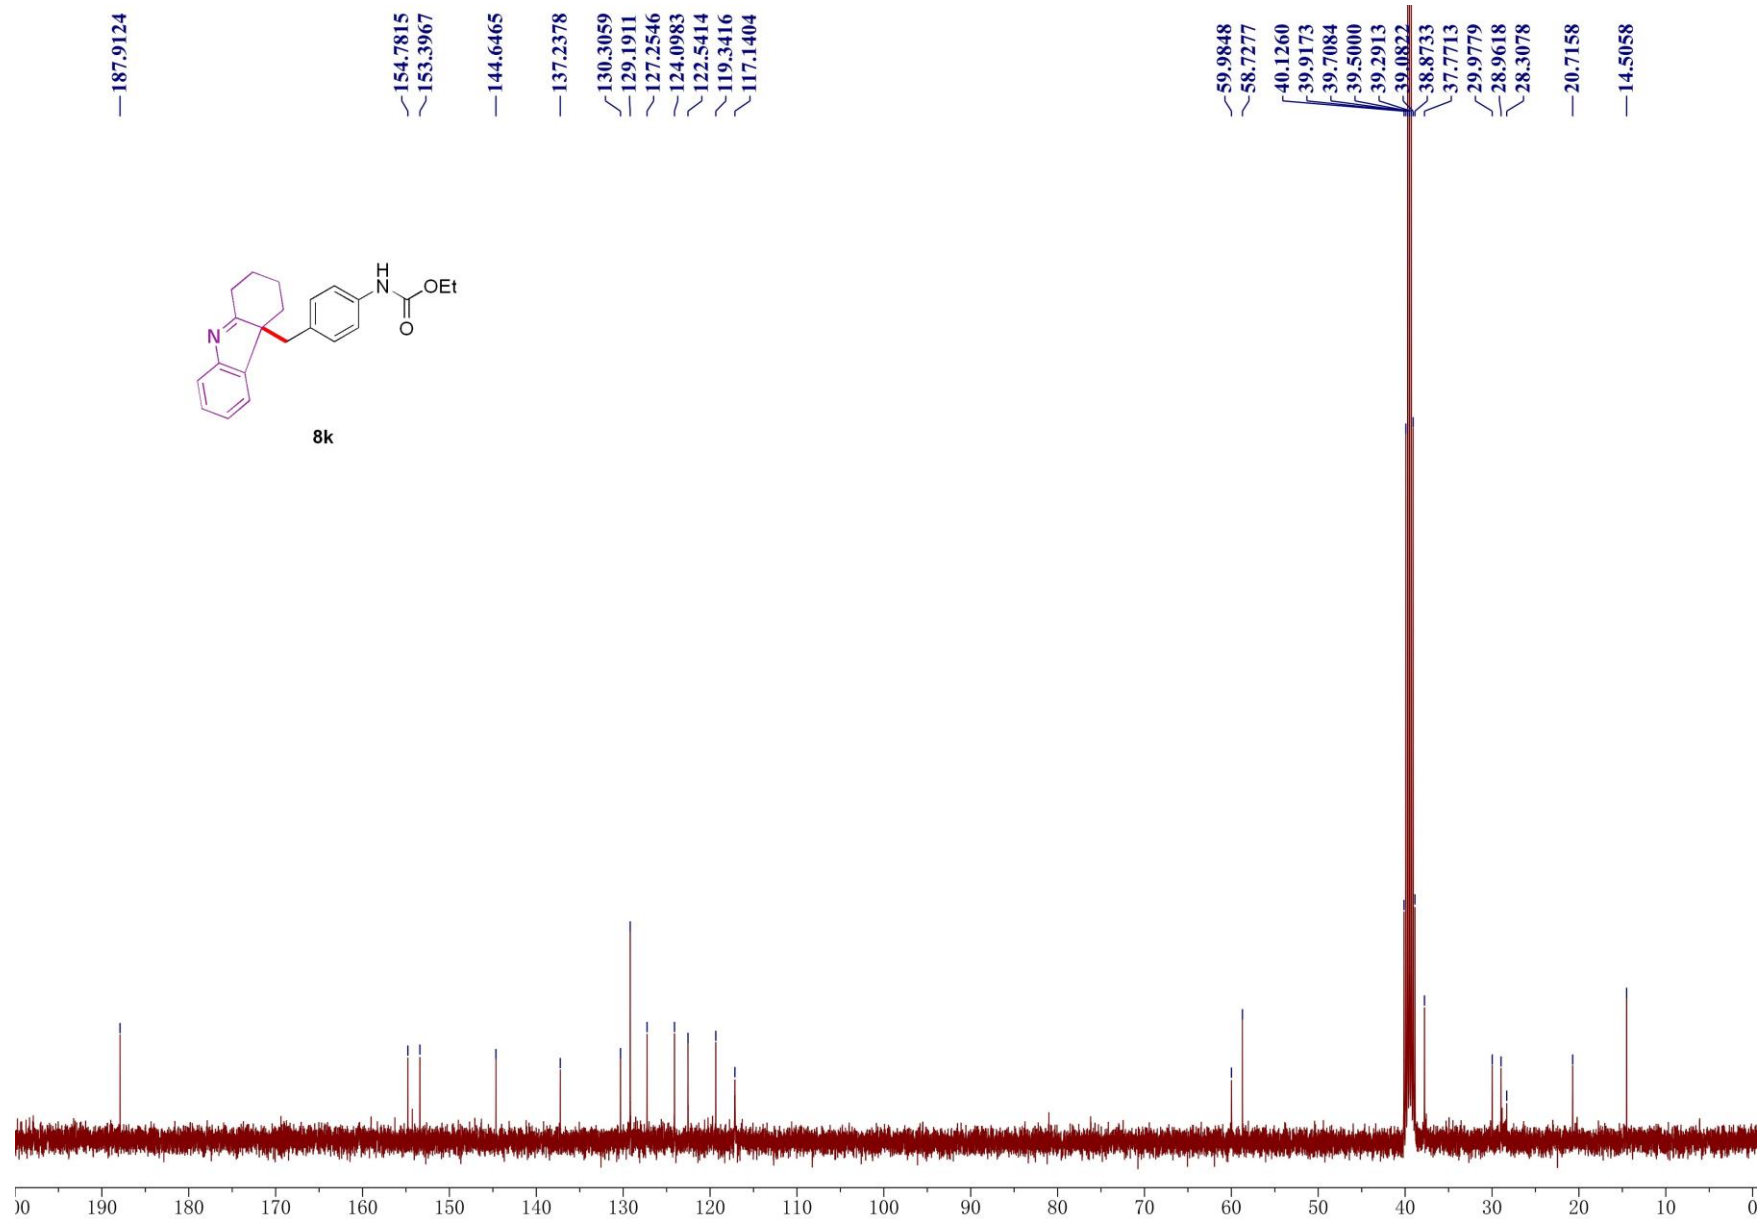

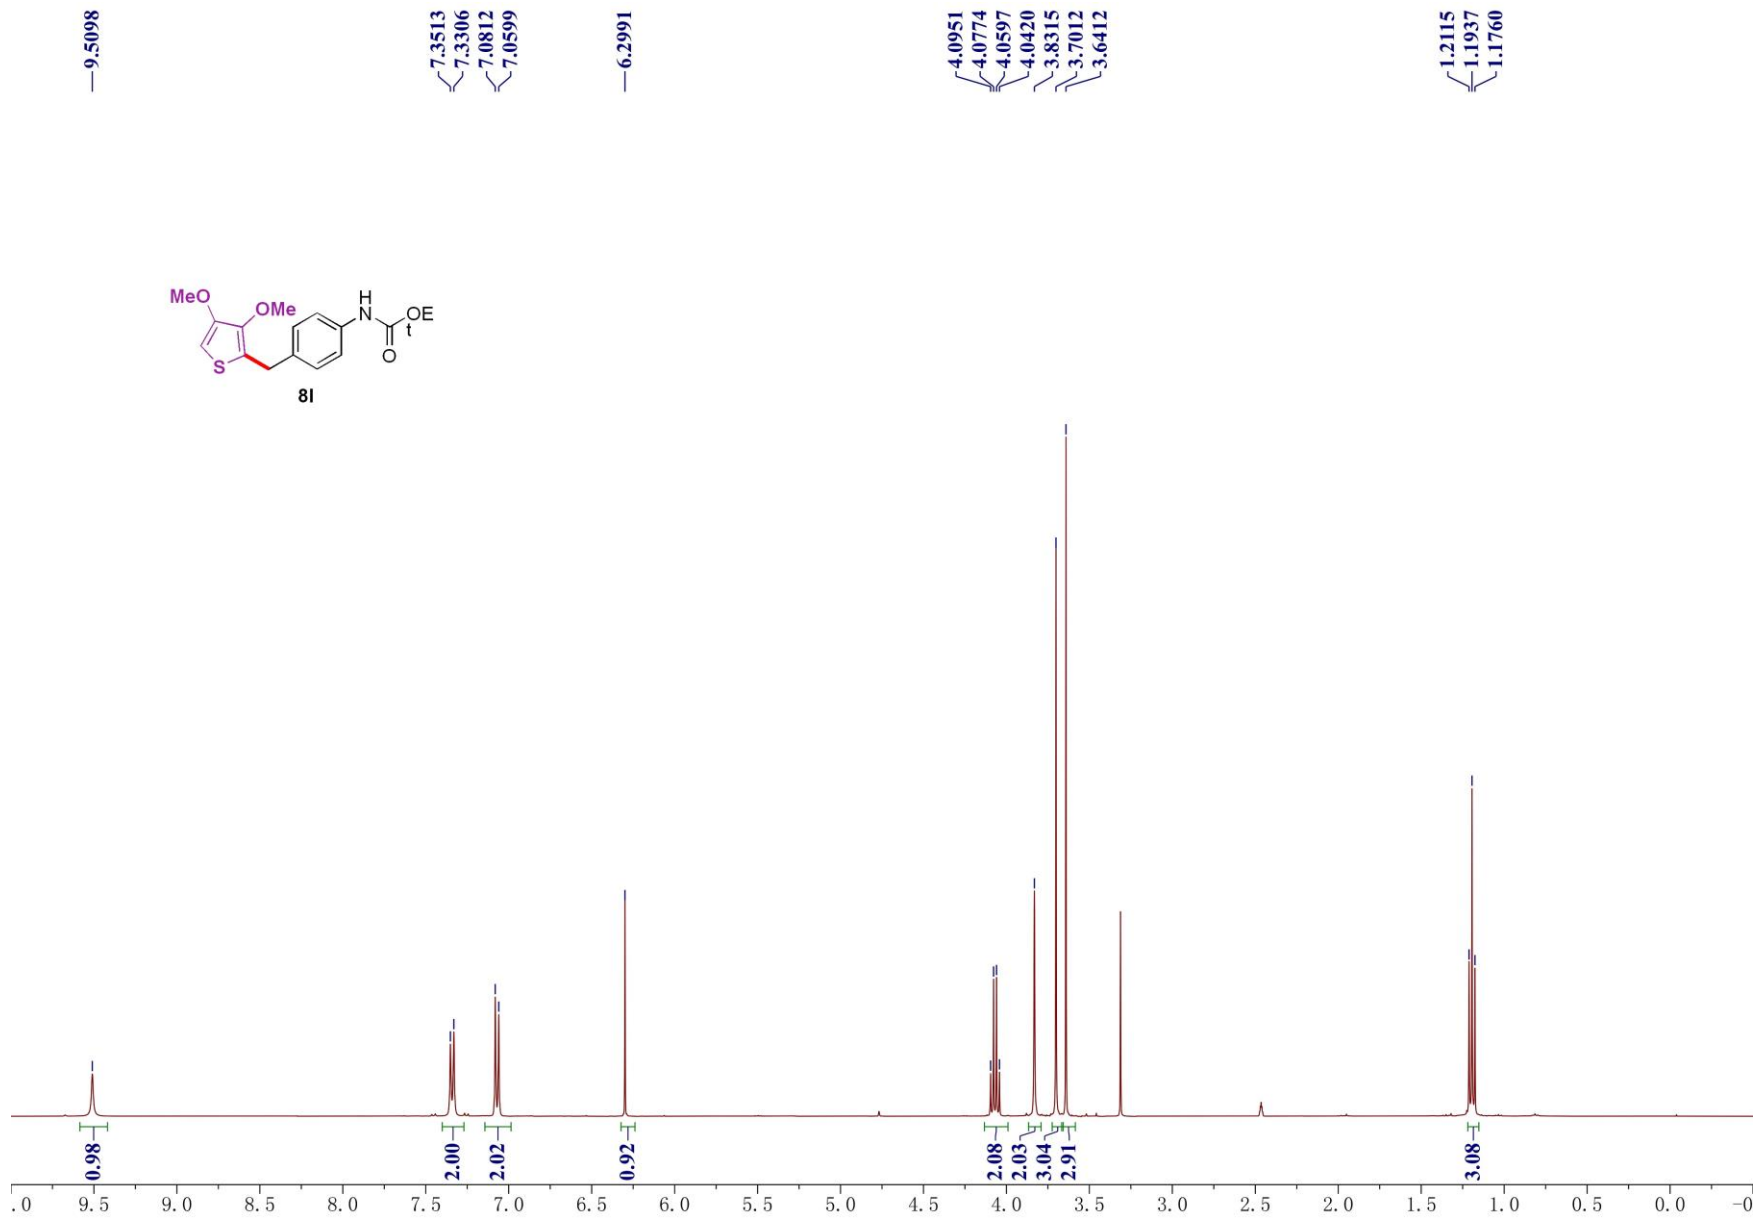

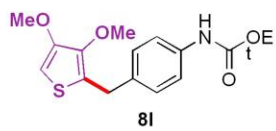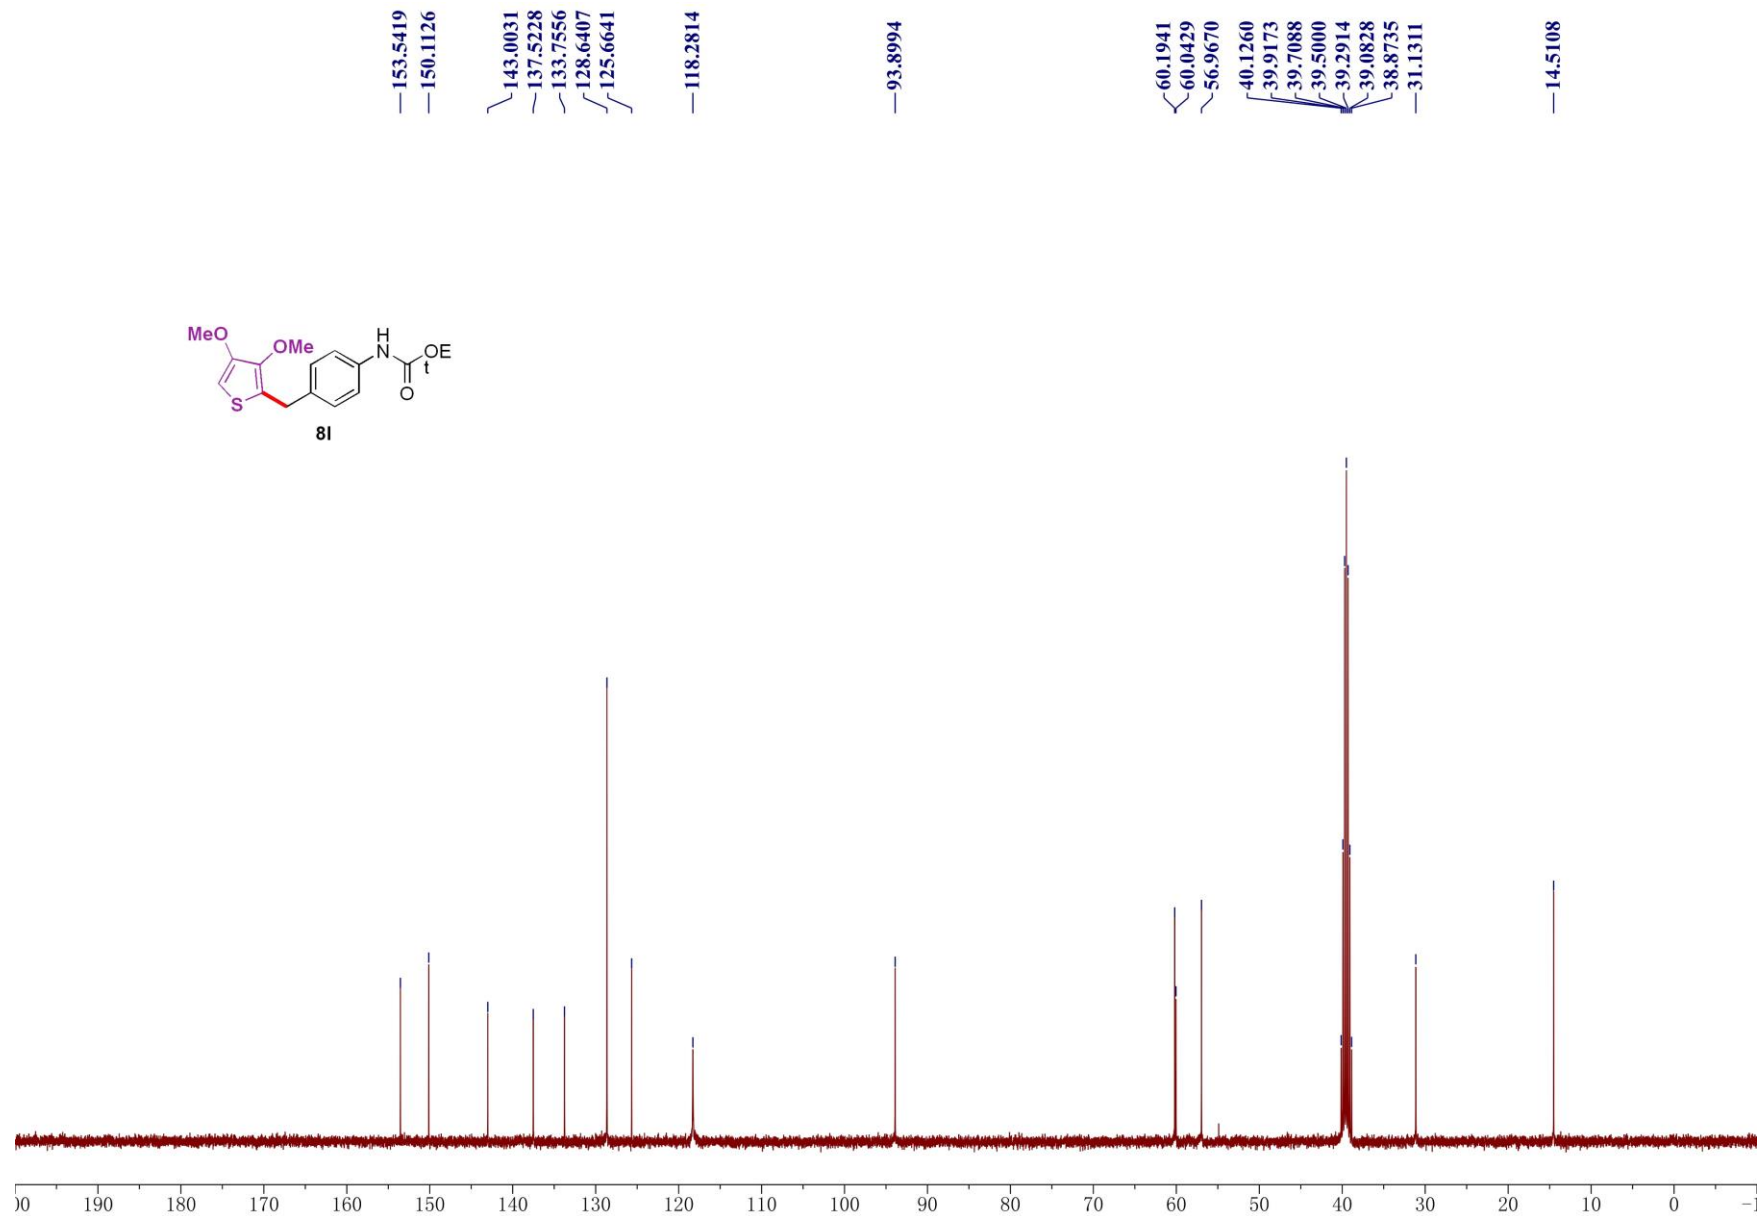

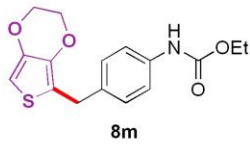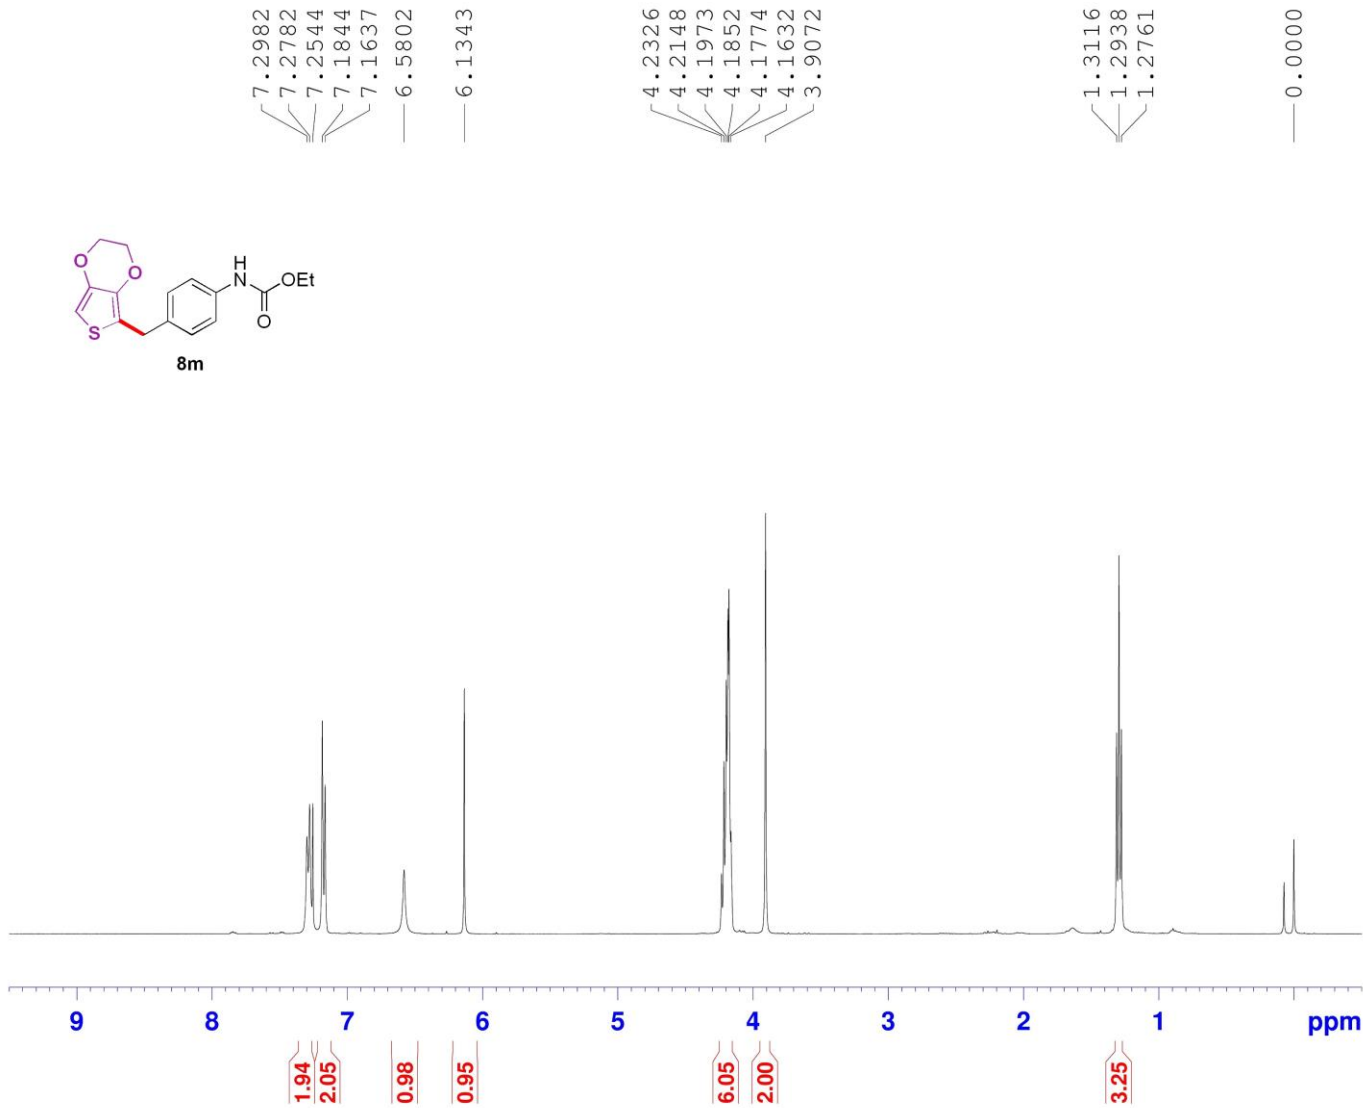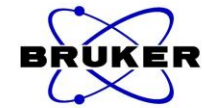

```

NAME      CLJ-WL-SZ162
EXPNO     1
PROCNO    1
Date_     20200115
Time      17.54
INSTRUM   spect
PROBHD    5 mm PABBO BB/
PULPROG   zg30
TD         65536
SOLVENT   CDCl3
NS         8
DS         0
SWH       8012.820 Hz
FIDRES    0.122266 Hz
AQ         4.0894966 sec
RG         70.36
DW         62.400 usec
DE         6.50 usec
TE         298.0 K
D1         1.0000000 sec
TD0        1

----- CHANNEL f1 -----
SF01      400.1324710 MHz
NUC1       1H
P1         8.04 usec
SI         65536
SF         400.1300116 MHz
WDW        EM
SSB        0
LB         0.30 Hz
GB         0
PC         1.00

```

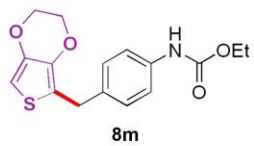

141.4711  
137.7980  
136.2010  
134.9733  
129.0545

118.7809  
116.7196

96.2563

77.3172  
76.9994  
76.6813

64.6590  
64.6016  
61.1459

31.2360

14.5327

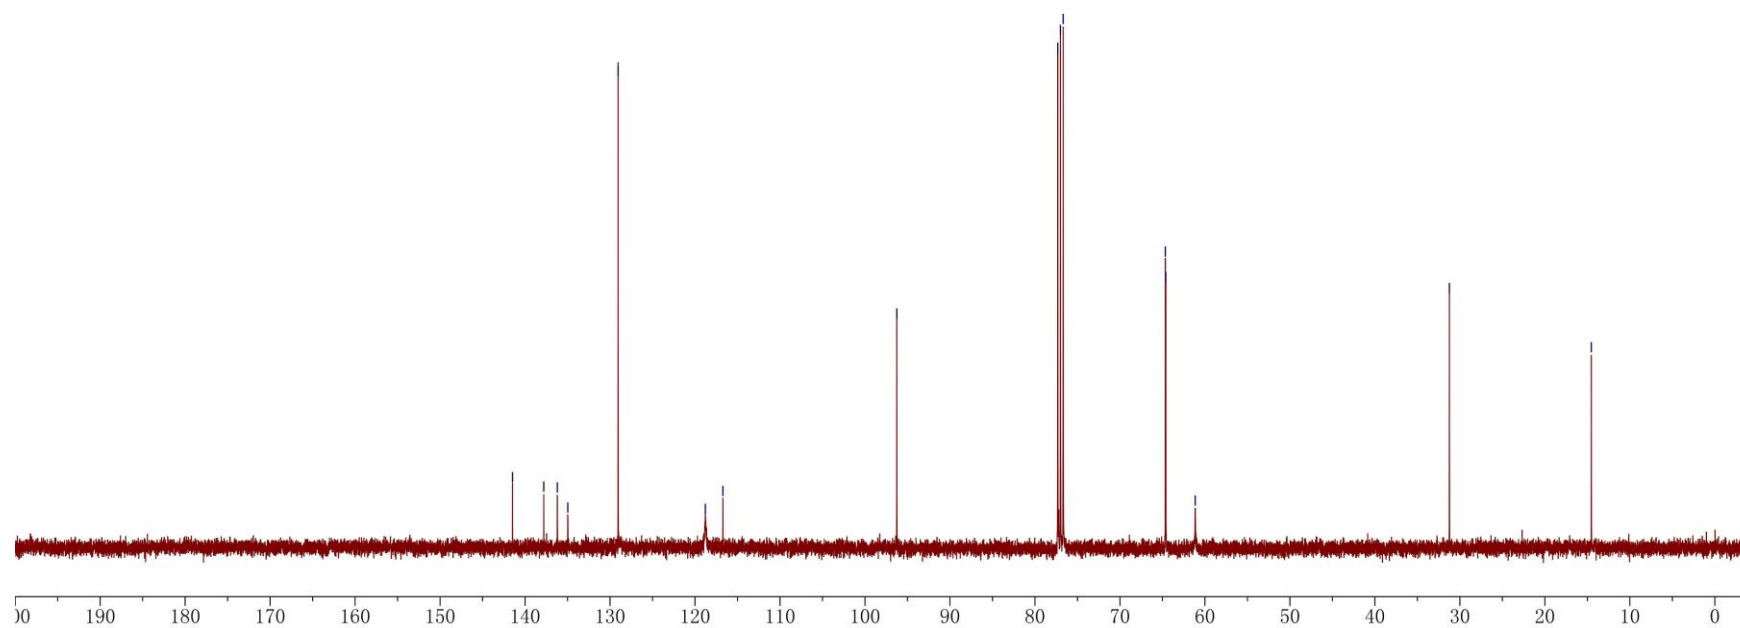

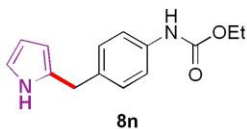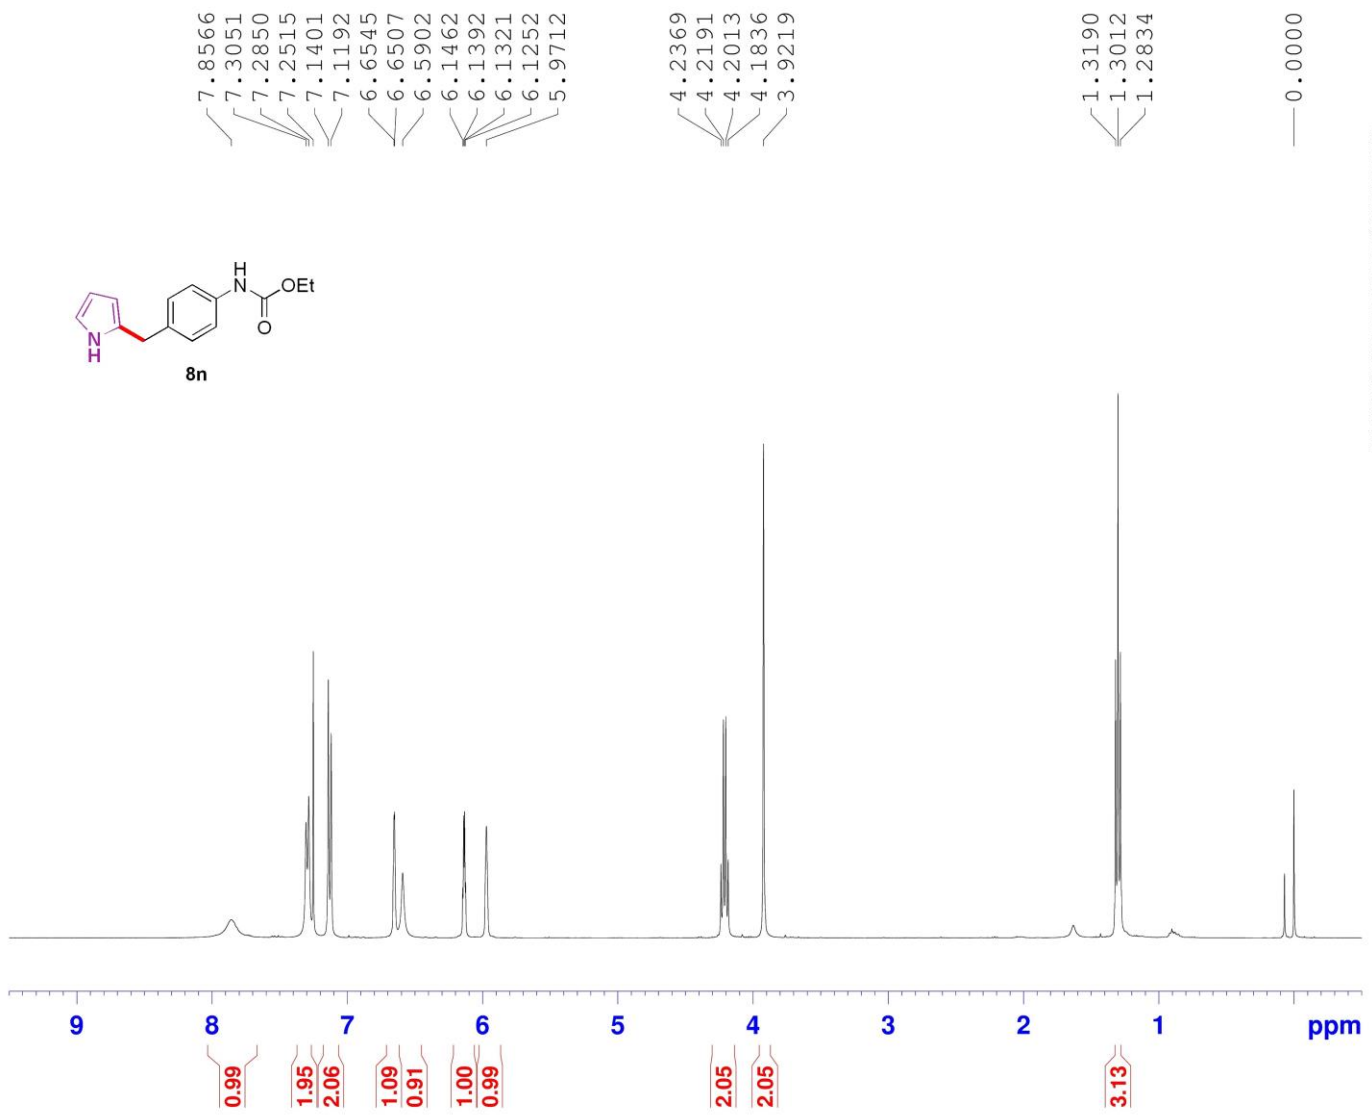

```

NAME      2019-11-25 shaozhong-S2120
EXPNO     1
PROCNO    1
Date_     20191125
Time      12.03 h
INSTRUM   spect
PROBHD    zg30
PULPROG   zg30
TD         65536
SOLVENT   CDCl3
NS         16
DS         2
SWH        8012.820 Hz
FIDRES     0.244532 Hz
AQ         4.0894966 sec
RG         65.43
DW         62.400 usec
DE         6.50 usec
TE         296.0 K
D1         1.00000000 sec
TDO        1
SFO1       400.1324708 MHz
NUC1       1H
P1         10.00 usec
S1         65536
SF         400.1300131 MHz
WOM        EM
SBB         0
LB         0.30 Hz
GB         0
PC         1.00
  
```

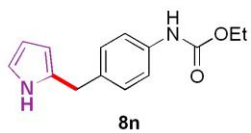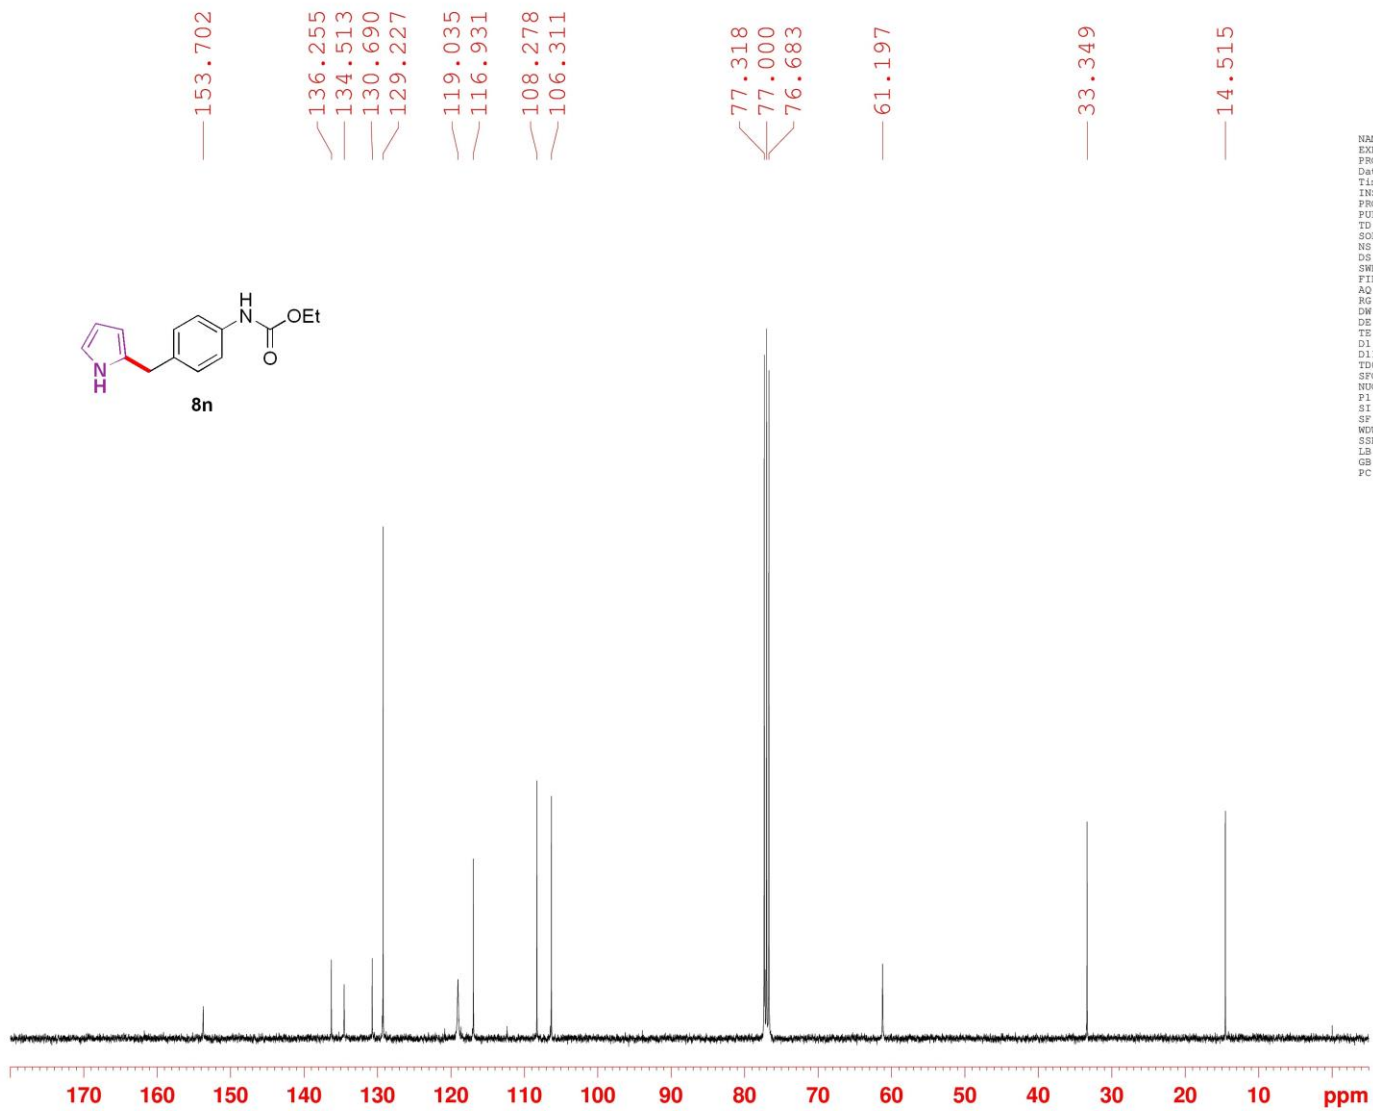

```

NAME      2019-12-03 shaohong-S2120
EXPNO    1
PROCNO    1
Date_    20191203
Time     16.56 h
INSTRUM   spect
PROBHD    z116098_0673 (
PULPROG   zgpg30
TD        65536
SOLVENT   CDCl3
NS        512
DS        4
SHE       24038.461 Hz
FIDRES    0.733596 Hz
AQ        1.3631988 sec
RG        203.48
DW        20.800 usec
DE        6.50 usec
TE        298.2 K
D1        2.00000000 sec
D11       0.03000000 sec
TDO       1
SFO1      100.6228298 MHz
NUC1      13C
P1        10.00 usec
SI        32768
SF        100.6127752 MHz
WDW       EM
SSB       0
LB        1.00 Hz
GB        0
PC        1.40
  
```

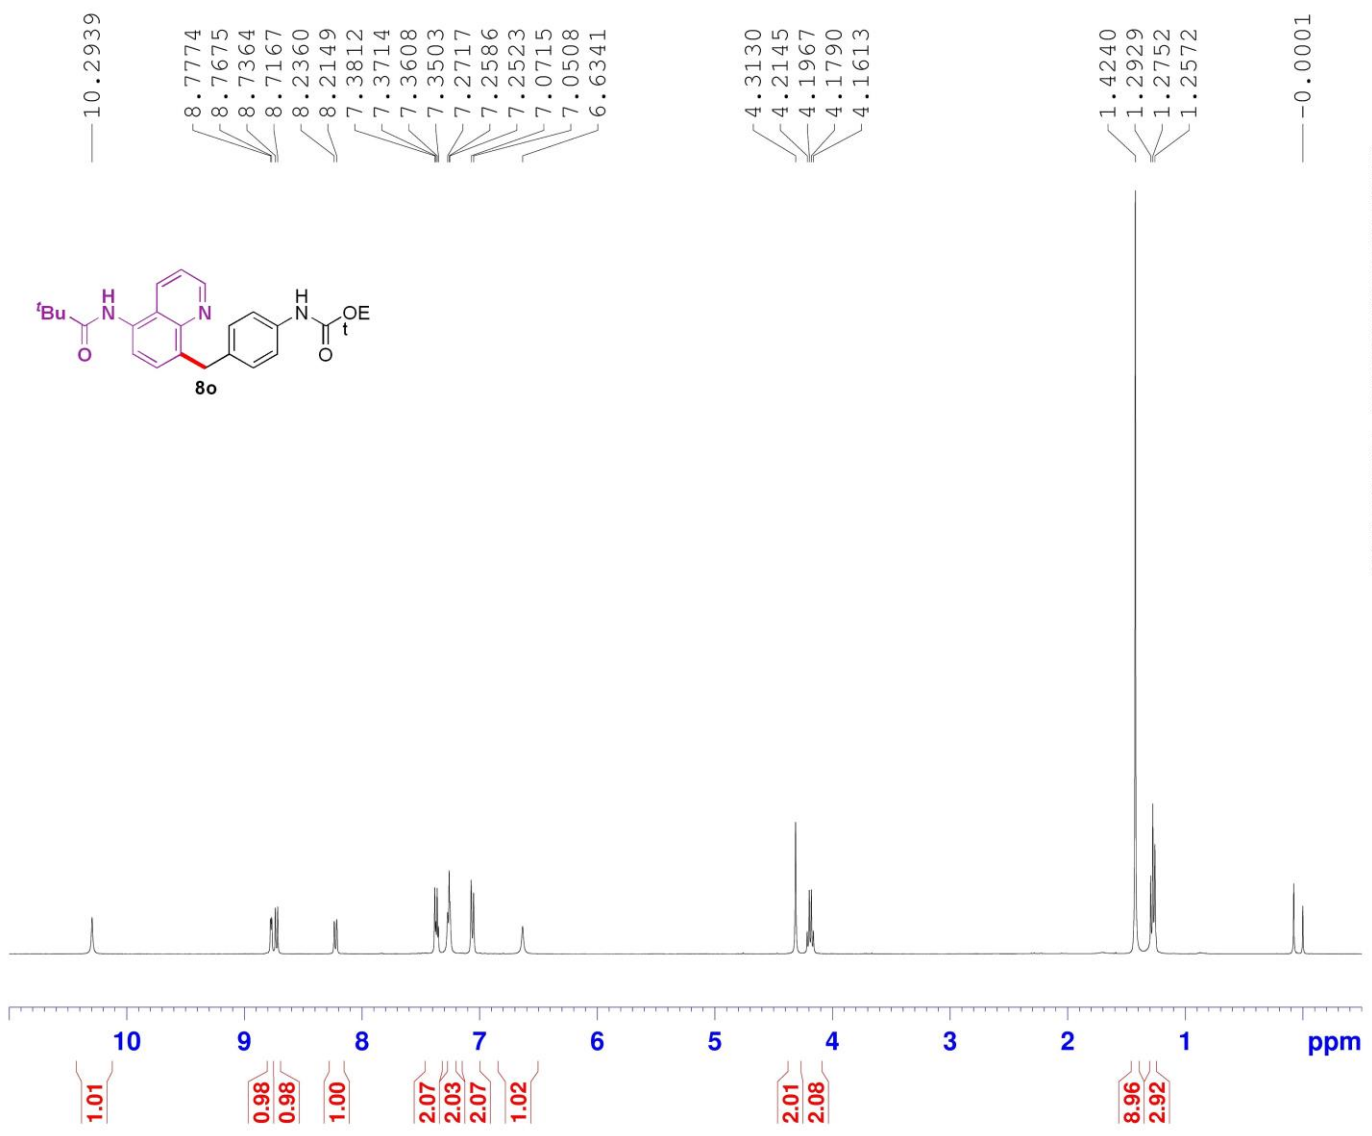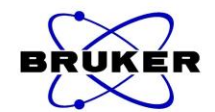

```

NAME      CLJ-WL-SZ160
EXPNO     1
PROCNO    1
Date_     20200115
Time      23.10
INSTRUM   spect
PROBHD    5 mm PABBO BB/
PULPROG   zg30
TD         65536
SOLVENT   CDCl3
NS         8
DS         0
SWH        8012.820 Hz
FIDRES     0.122266 Hz
AQ         4.0894966 sec
RG         70.36
DW         62.400 usec
DE         6.50 usec
TE         298.0 K
D1         1.0000000 sec
TD0        1

----- CHANNEL f1 -----
SF01      400.1324710 MHz
NUC1       1H
P1         8.04 usec
SI         65536
SF         400.1300100 MHz
WDW        EM
SSB        0
LB         0.30 Hz
GB         0
PC         1.00

```



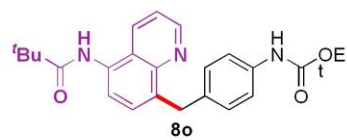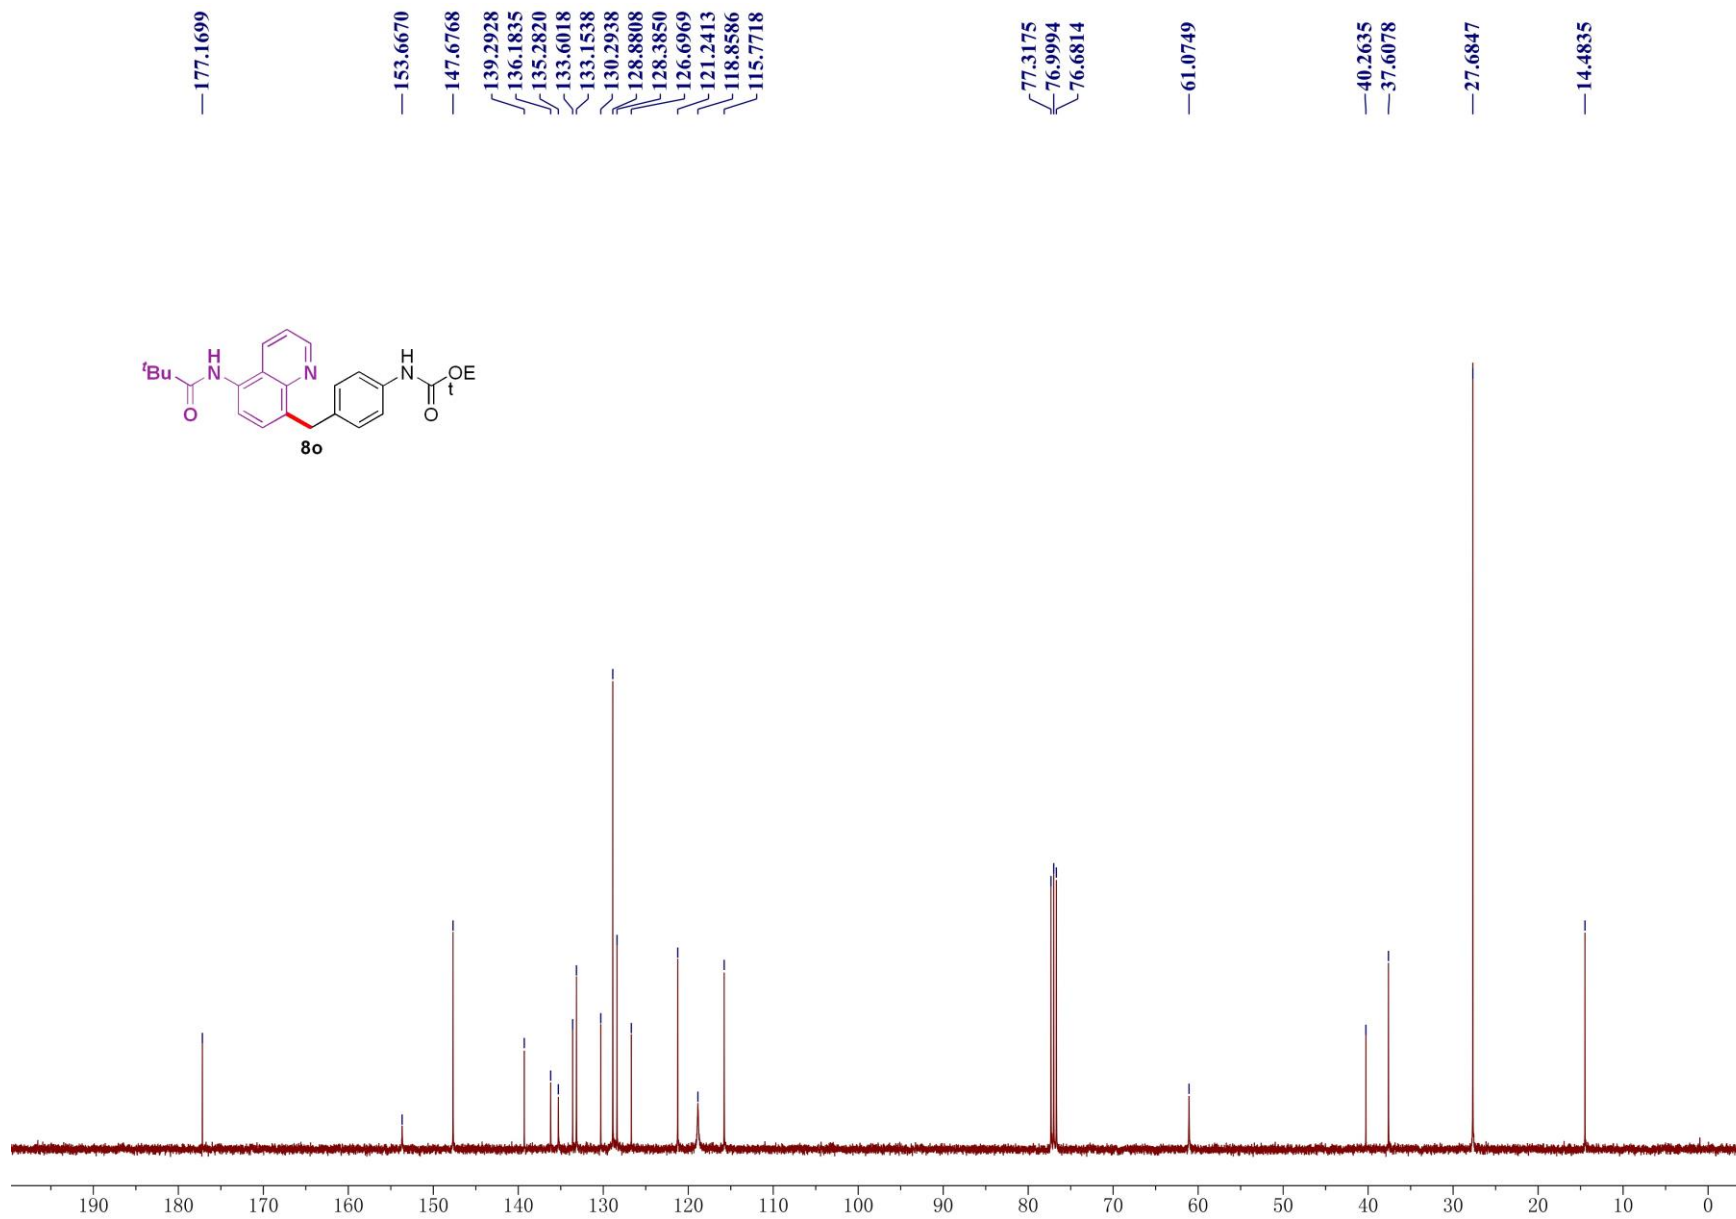

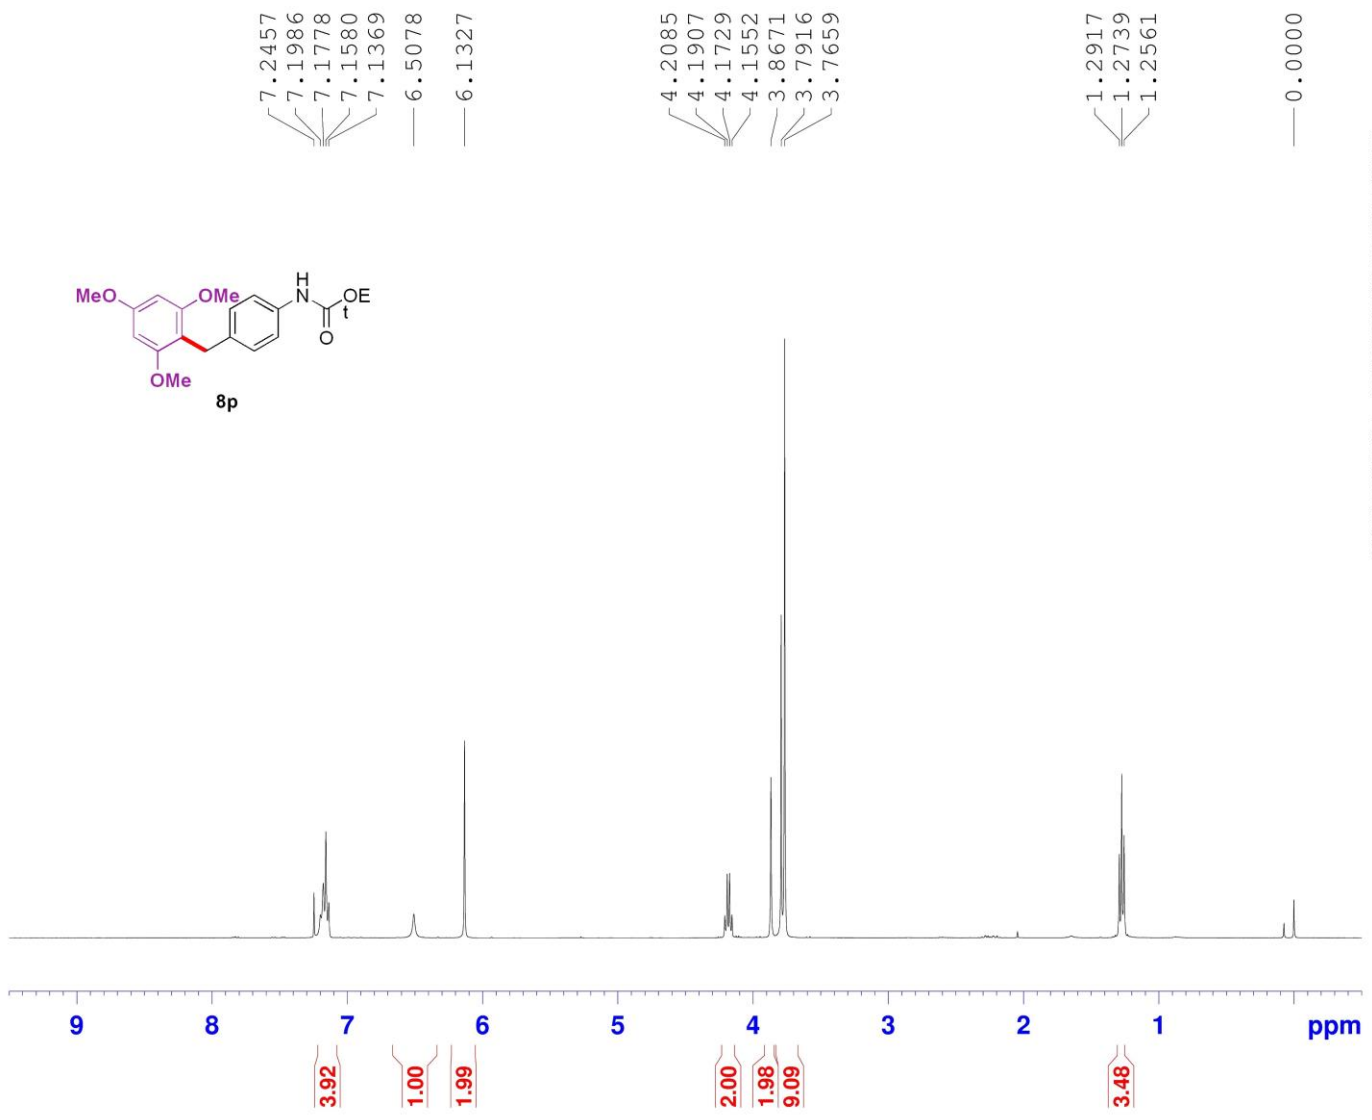

```

NAME      CLJ-WL-SZ159
EXPNO     1
PROCNO    1
Date_     20200115
Time      9.58
INSTRUM   spect
PROBHD    5 mm PABBO BB/
PULPROG   zg30
TD         65536
SOLVENT   CDCl3
NS         8
DS         0
SWH        8012.820 Hz
FIDRES     0.122266 Hz
AQ         4.0894966 sec
RG         47.53
DW         62.400 usec
DE         6.50 usec
TE         298.0 K
D1         1.00000000 sec
TD0        1

----- CHANNEL f1 -----
SF01      400.1324710 MHz
NUC1       1H
P1         8.04 usec
SI         65536
SF         400.1300152 MHz
WDW        EM
SSB        0
LB         0.30 Hz
GB         0
PC         1.00

```

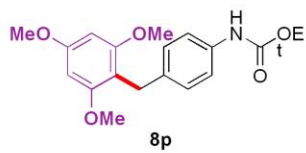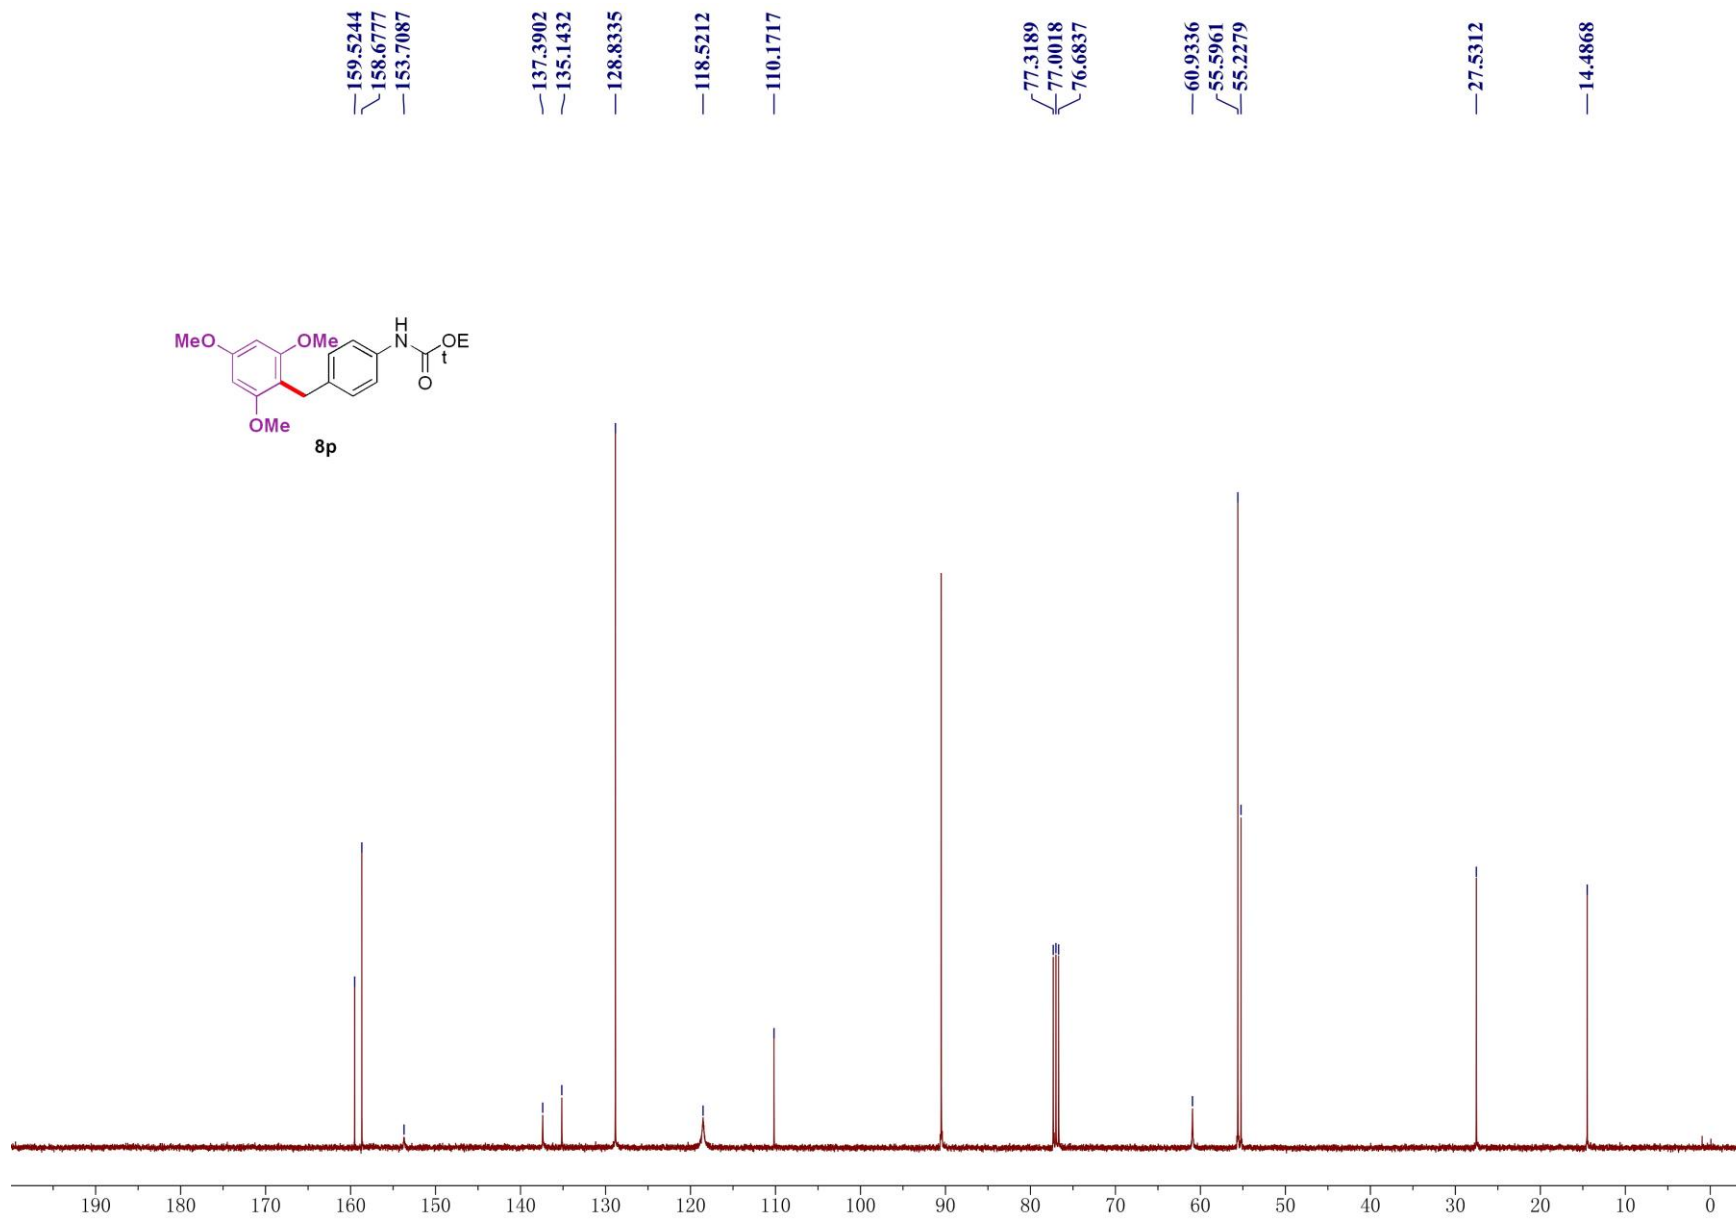

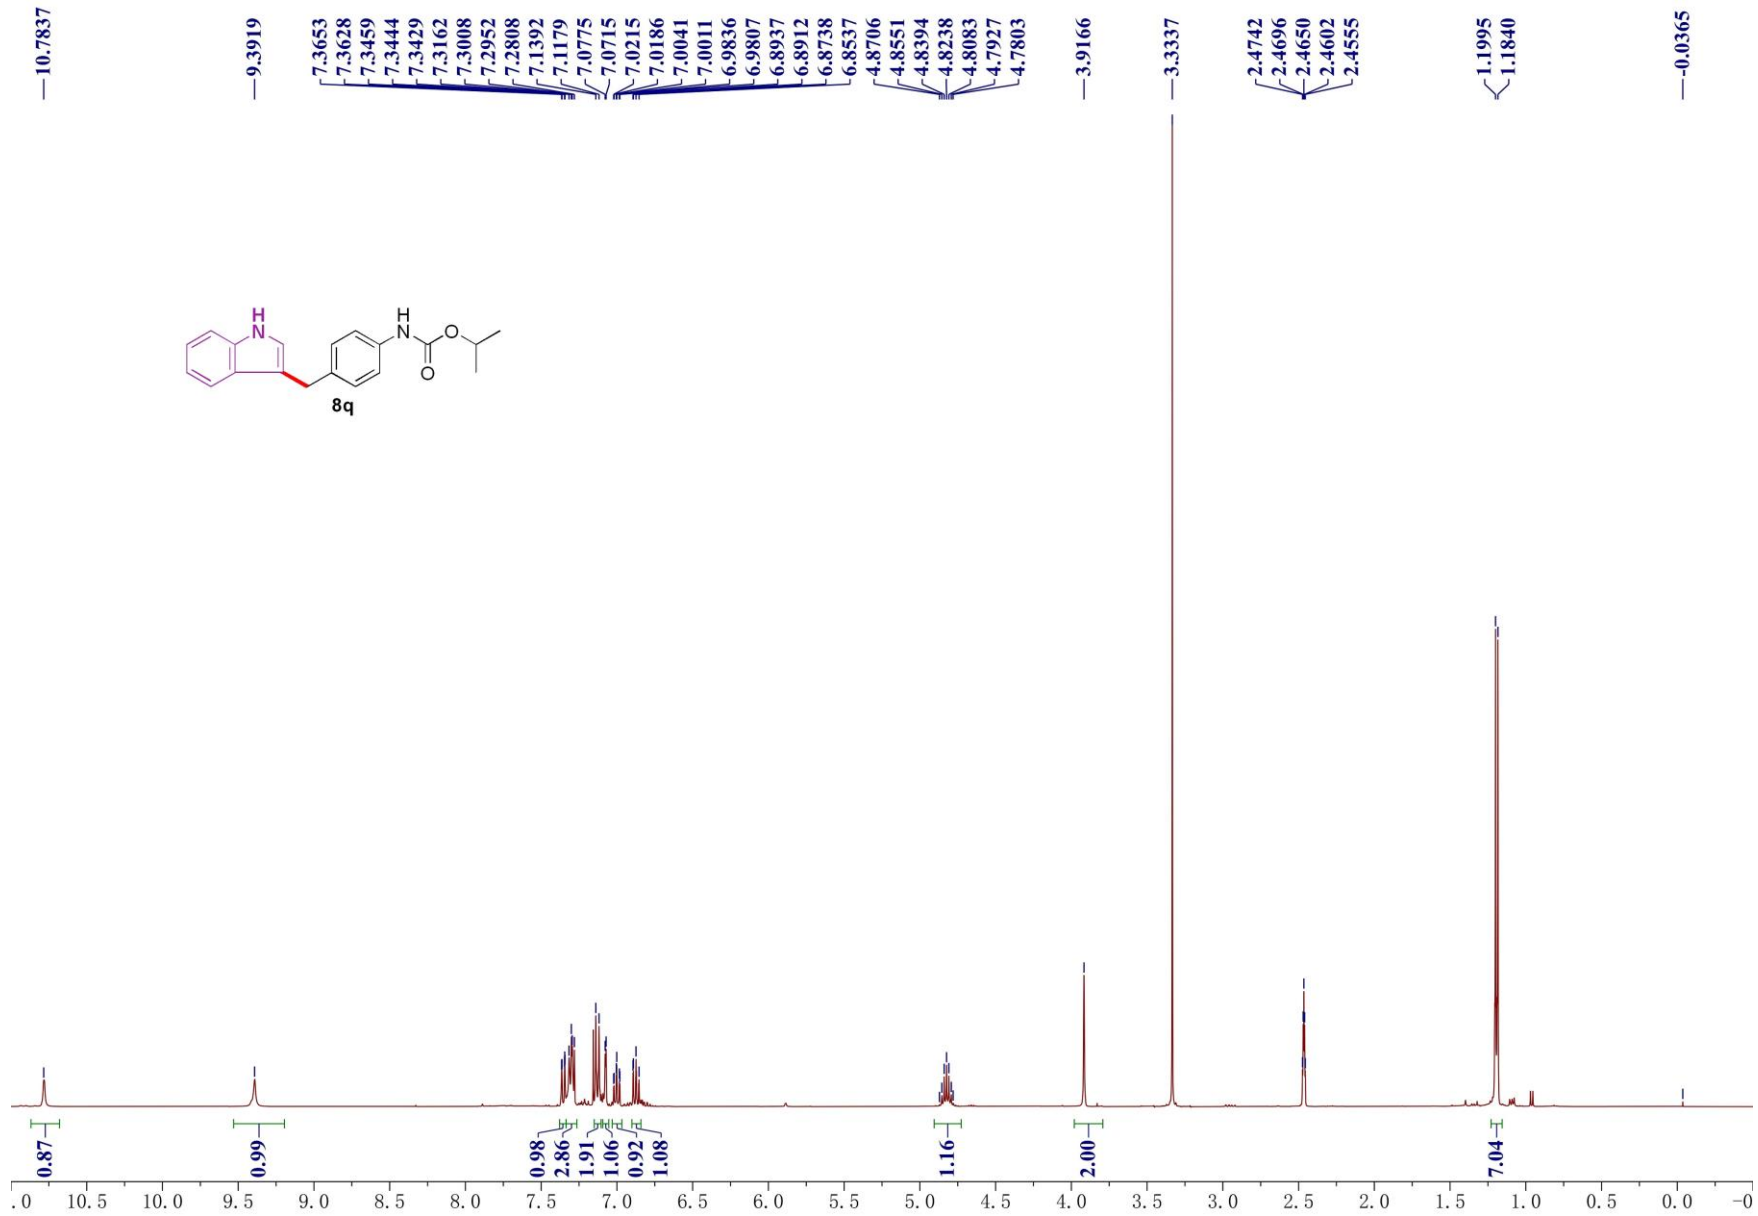

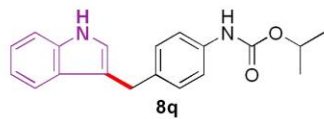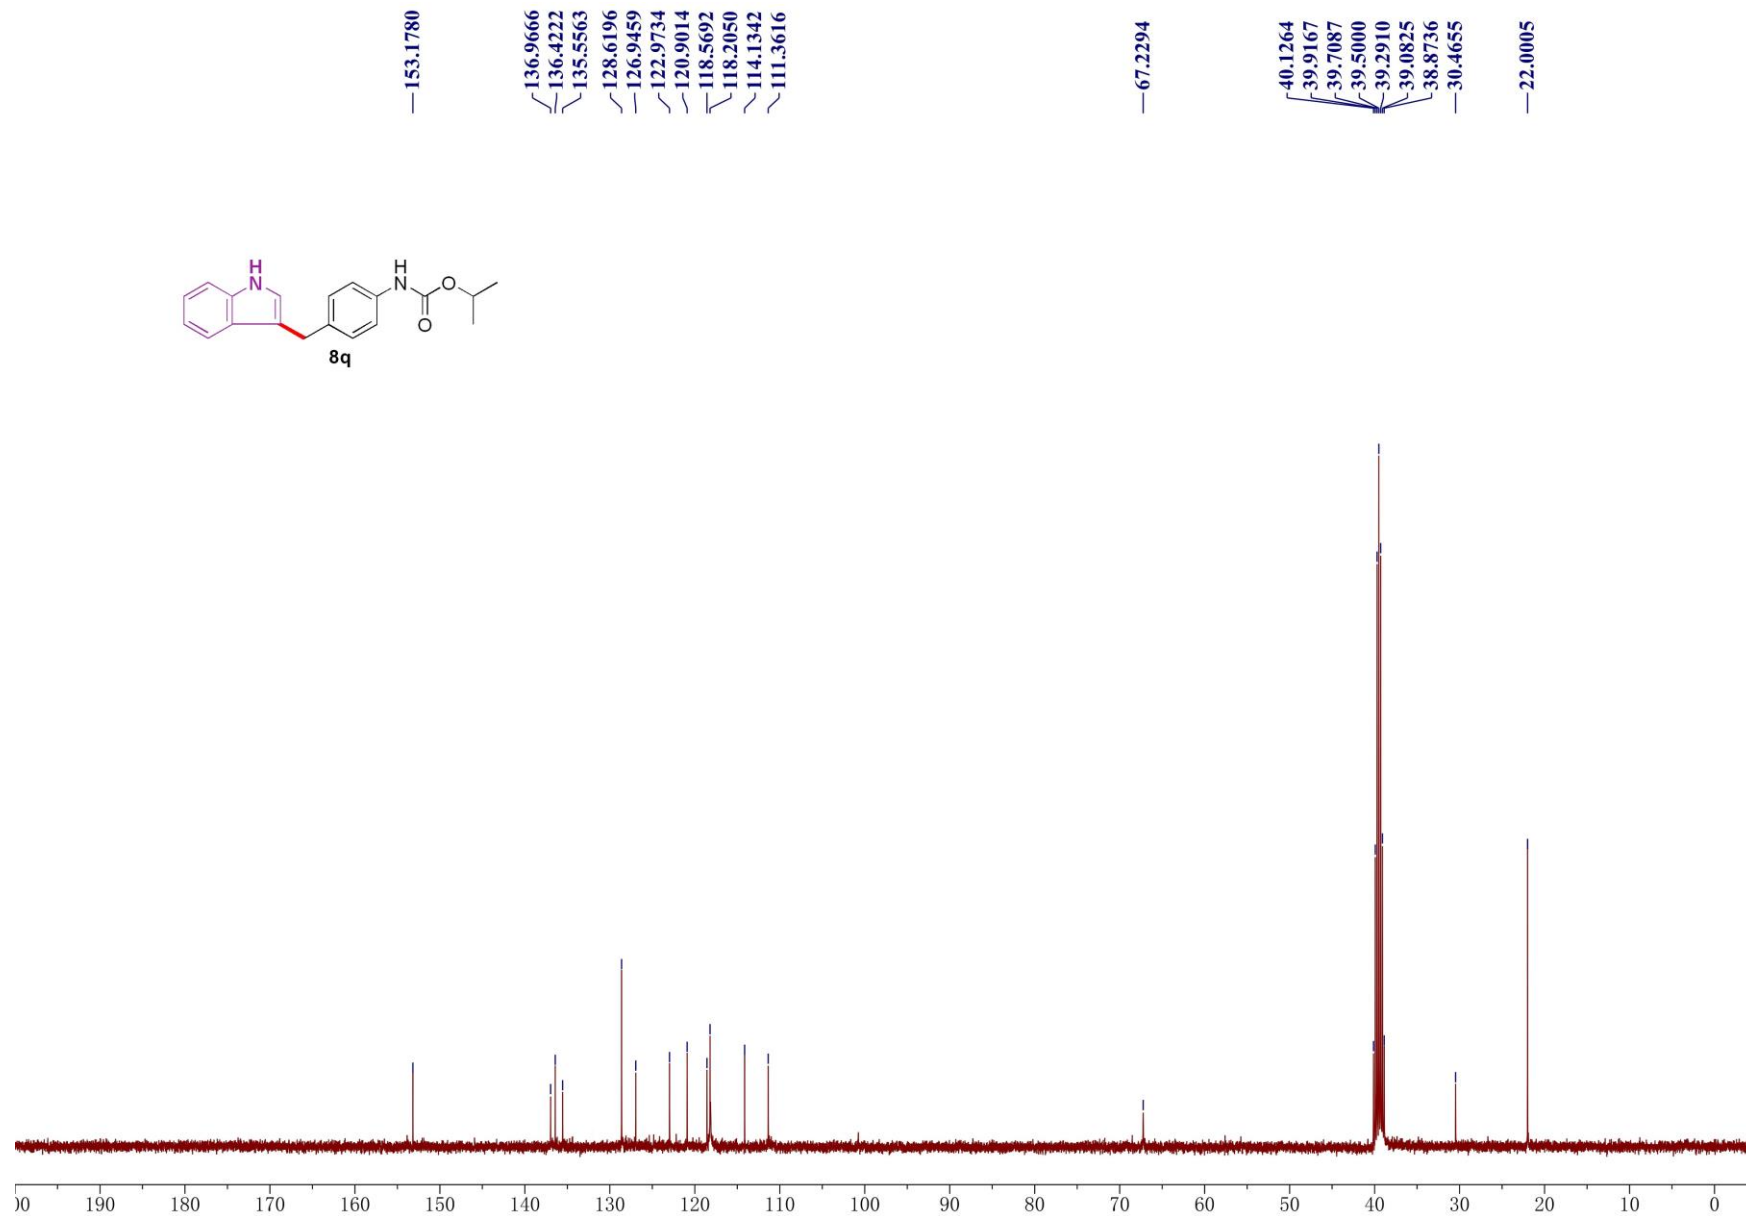

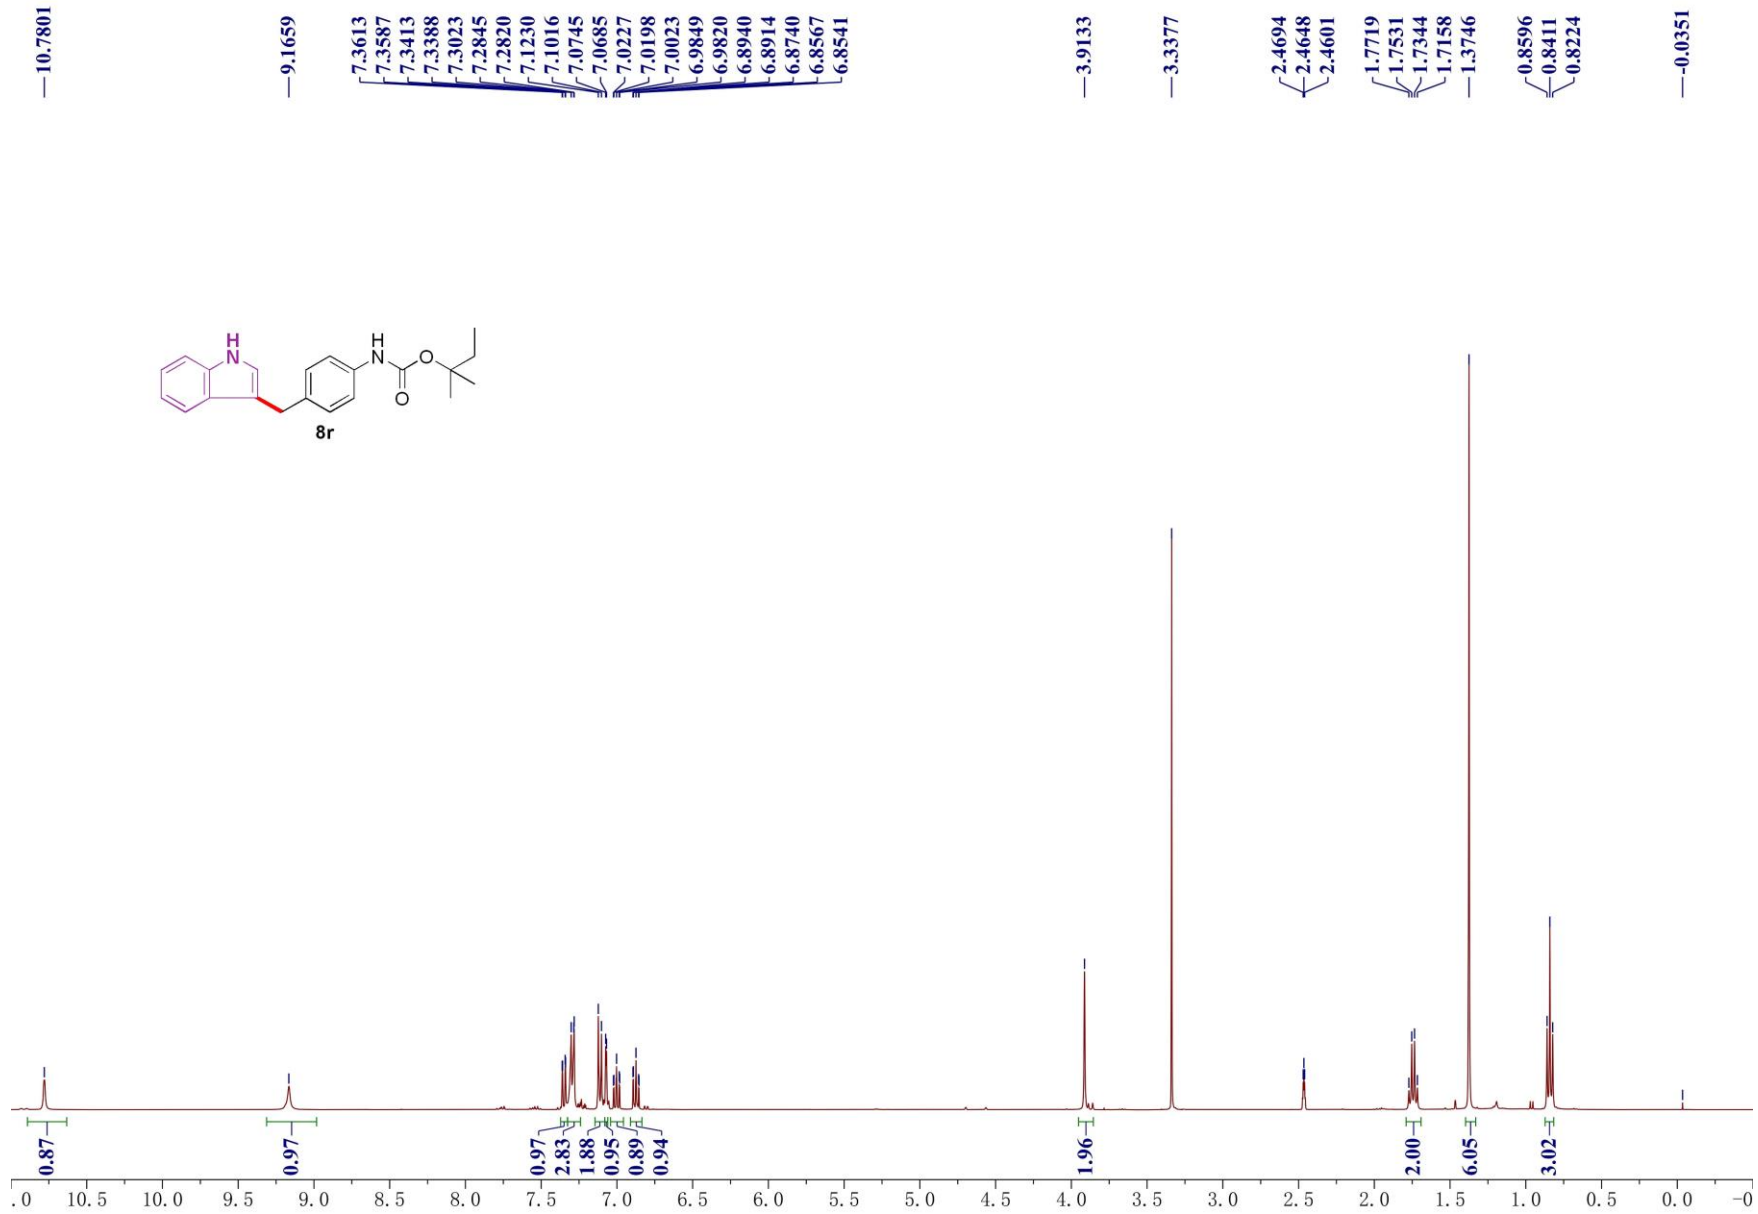

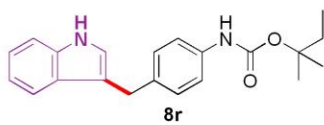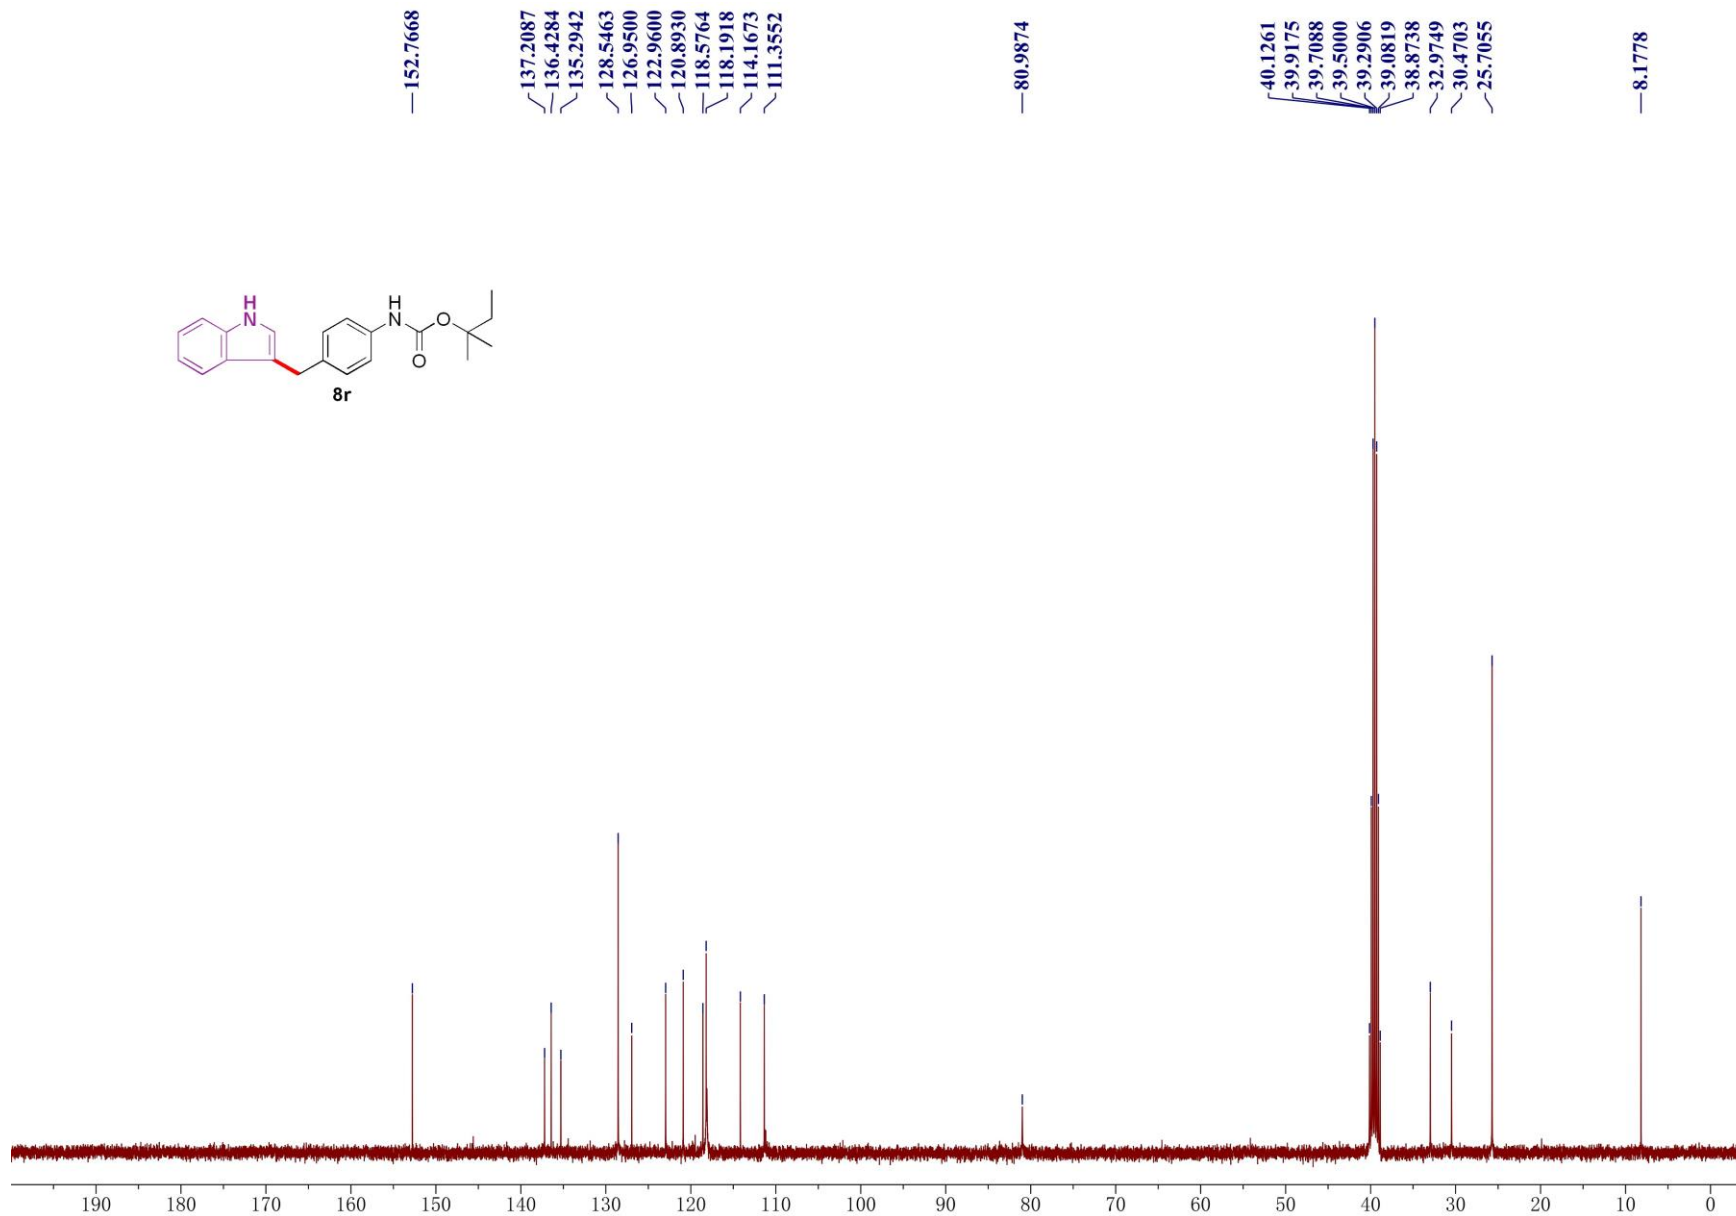

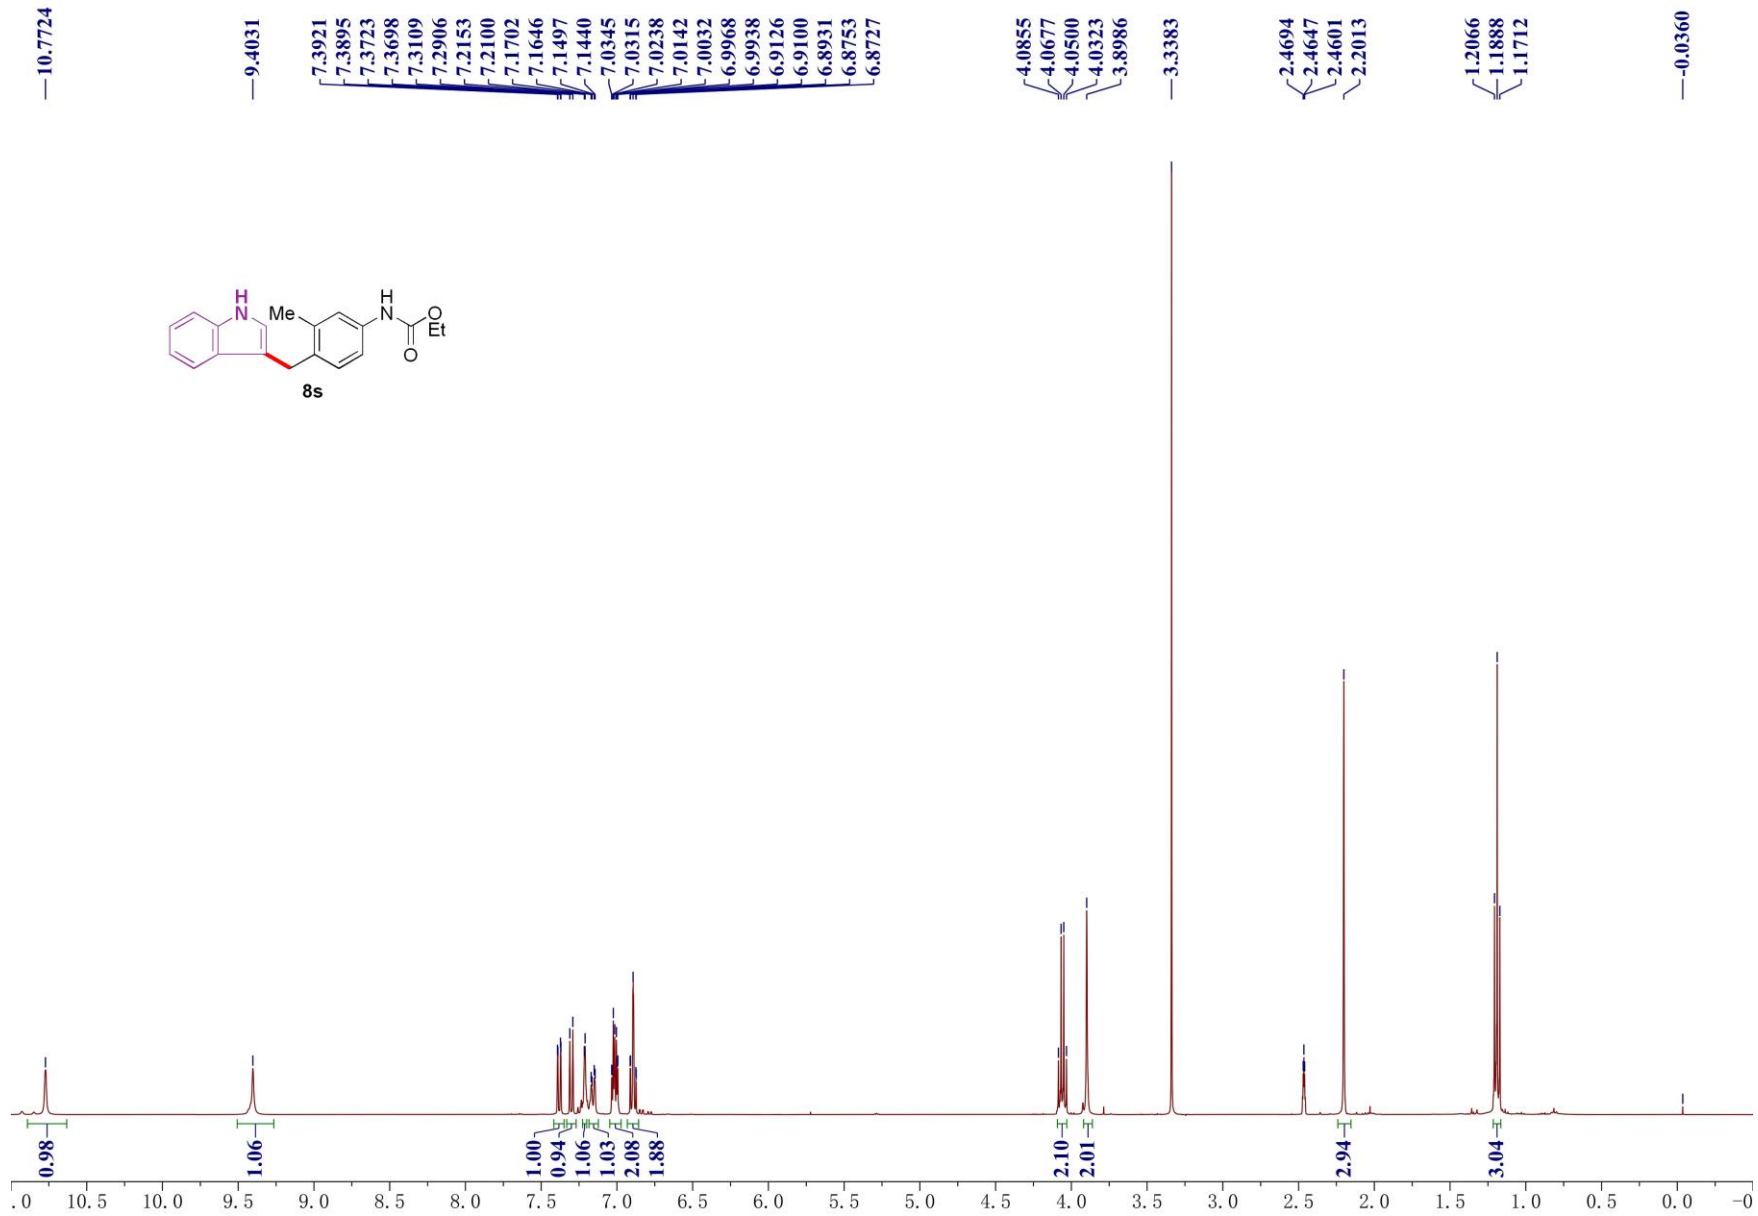



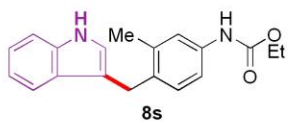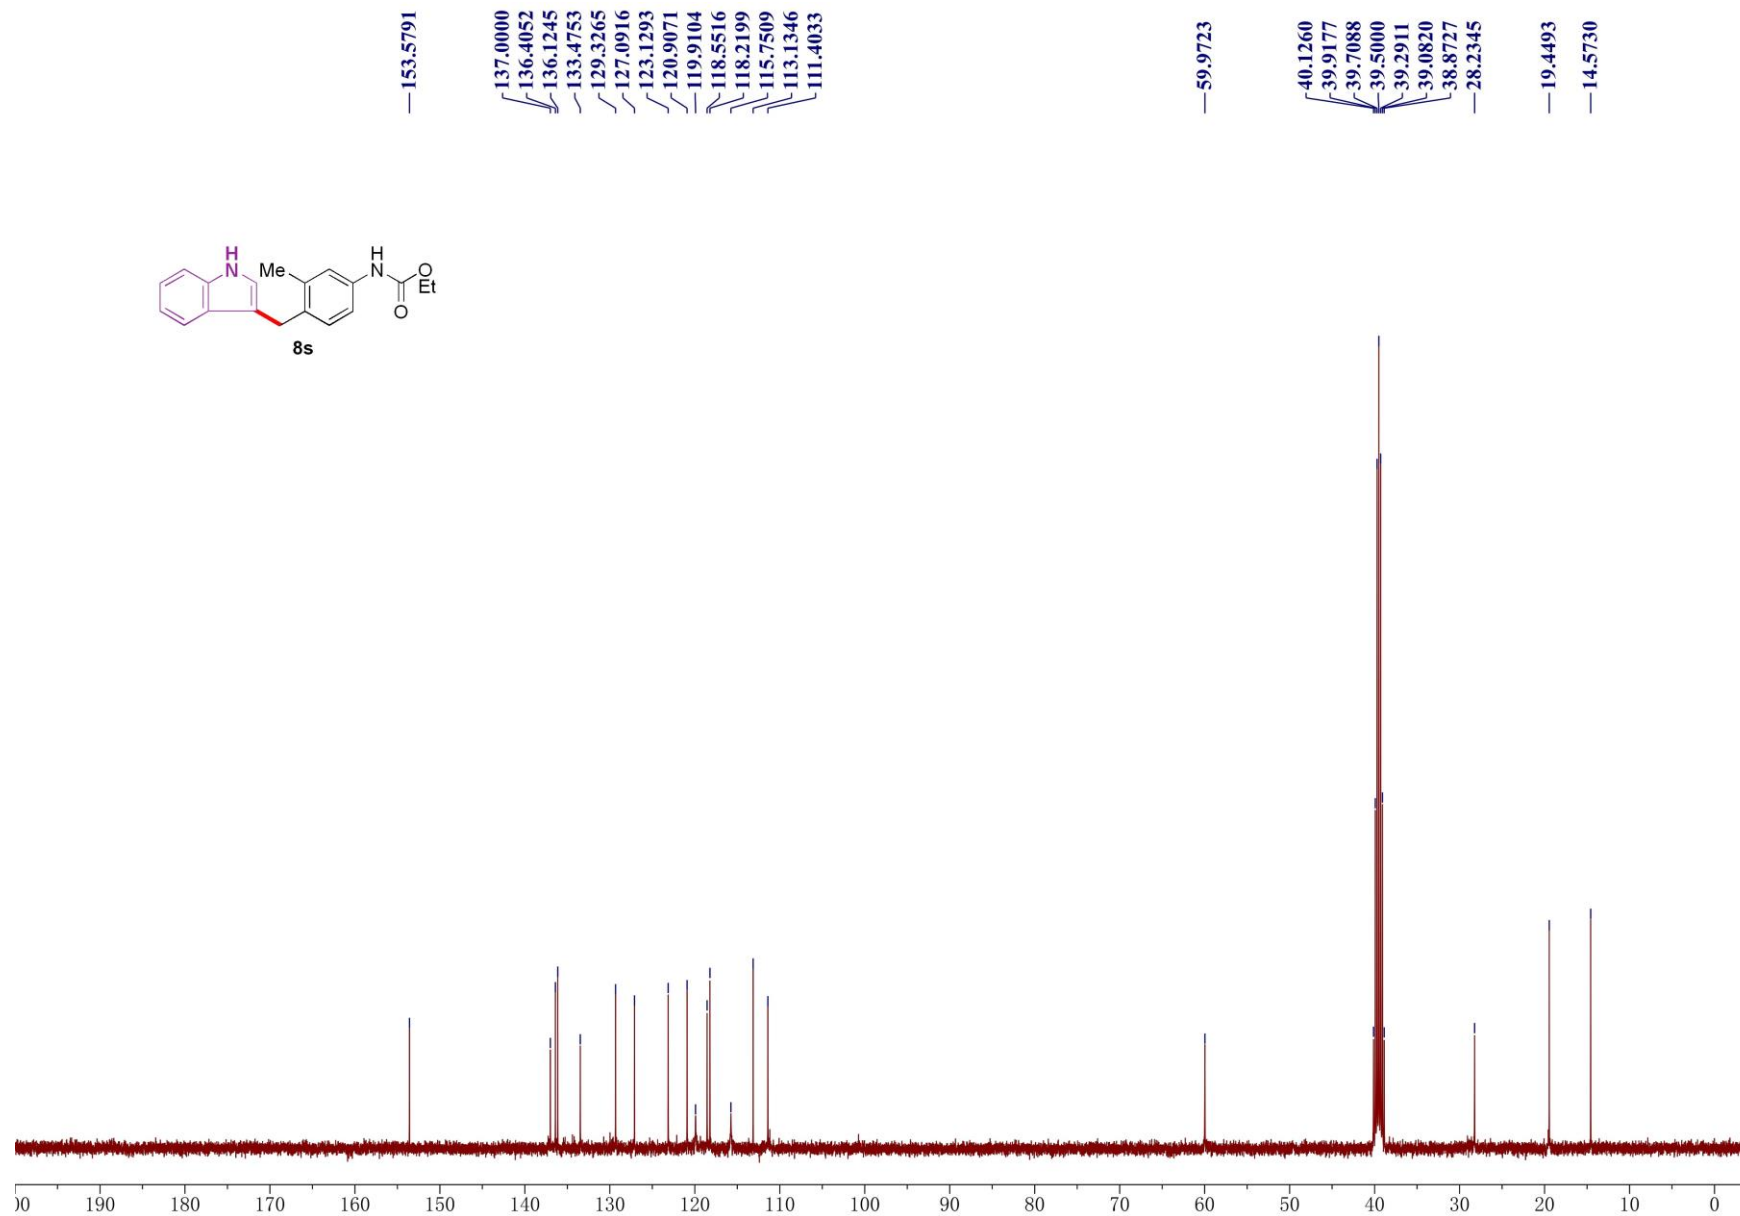

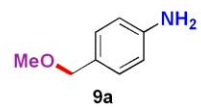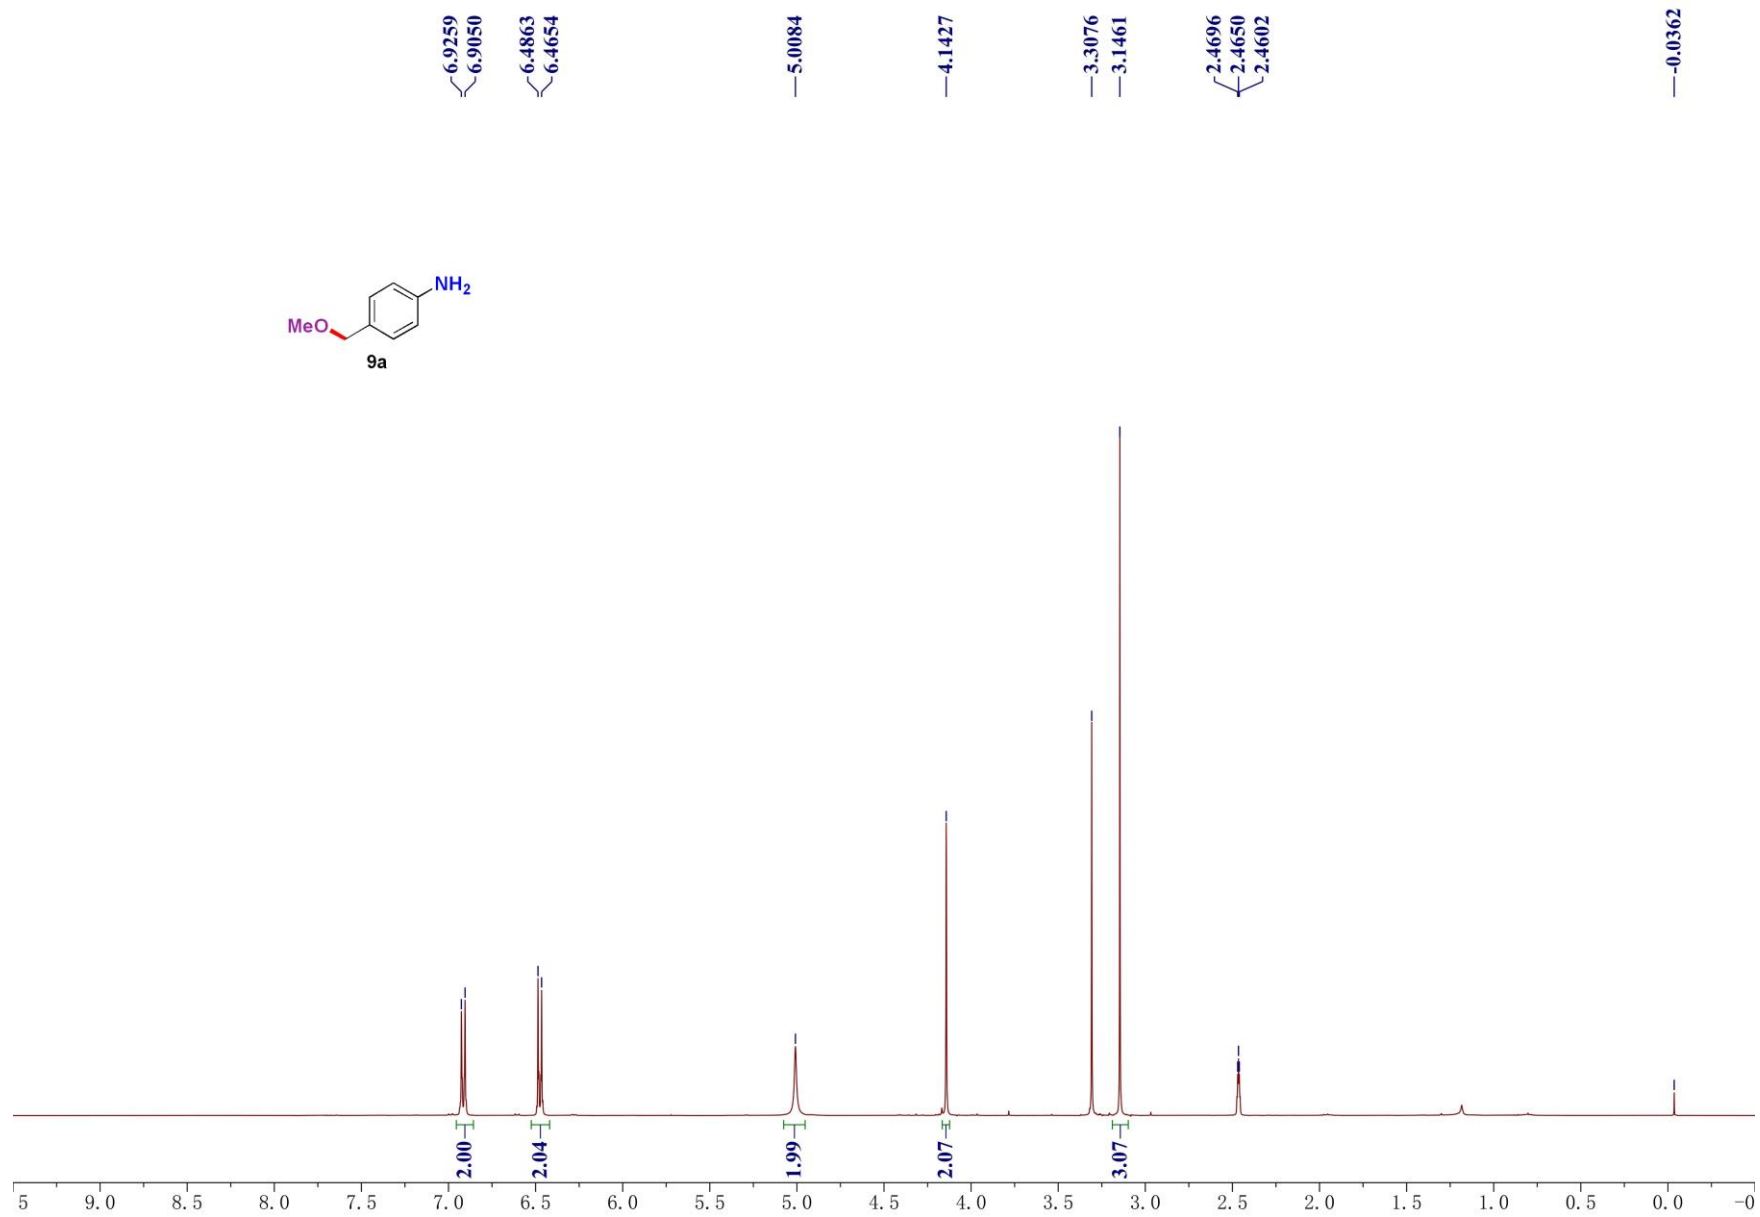

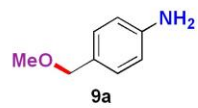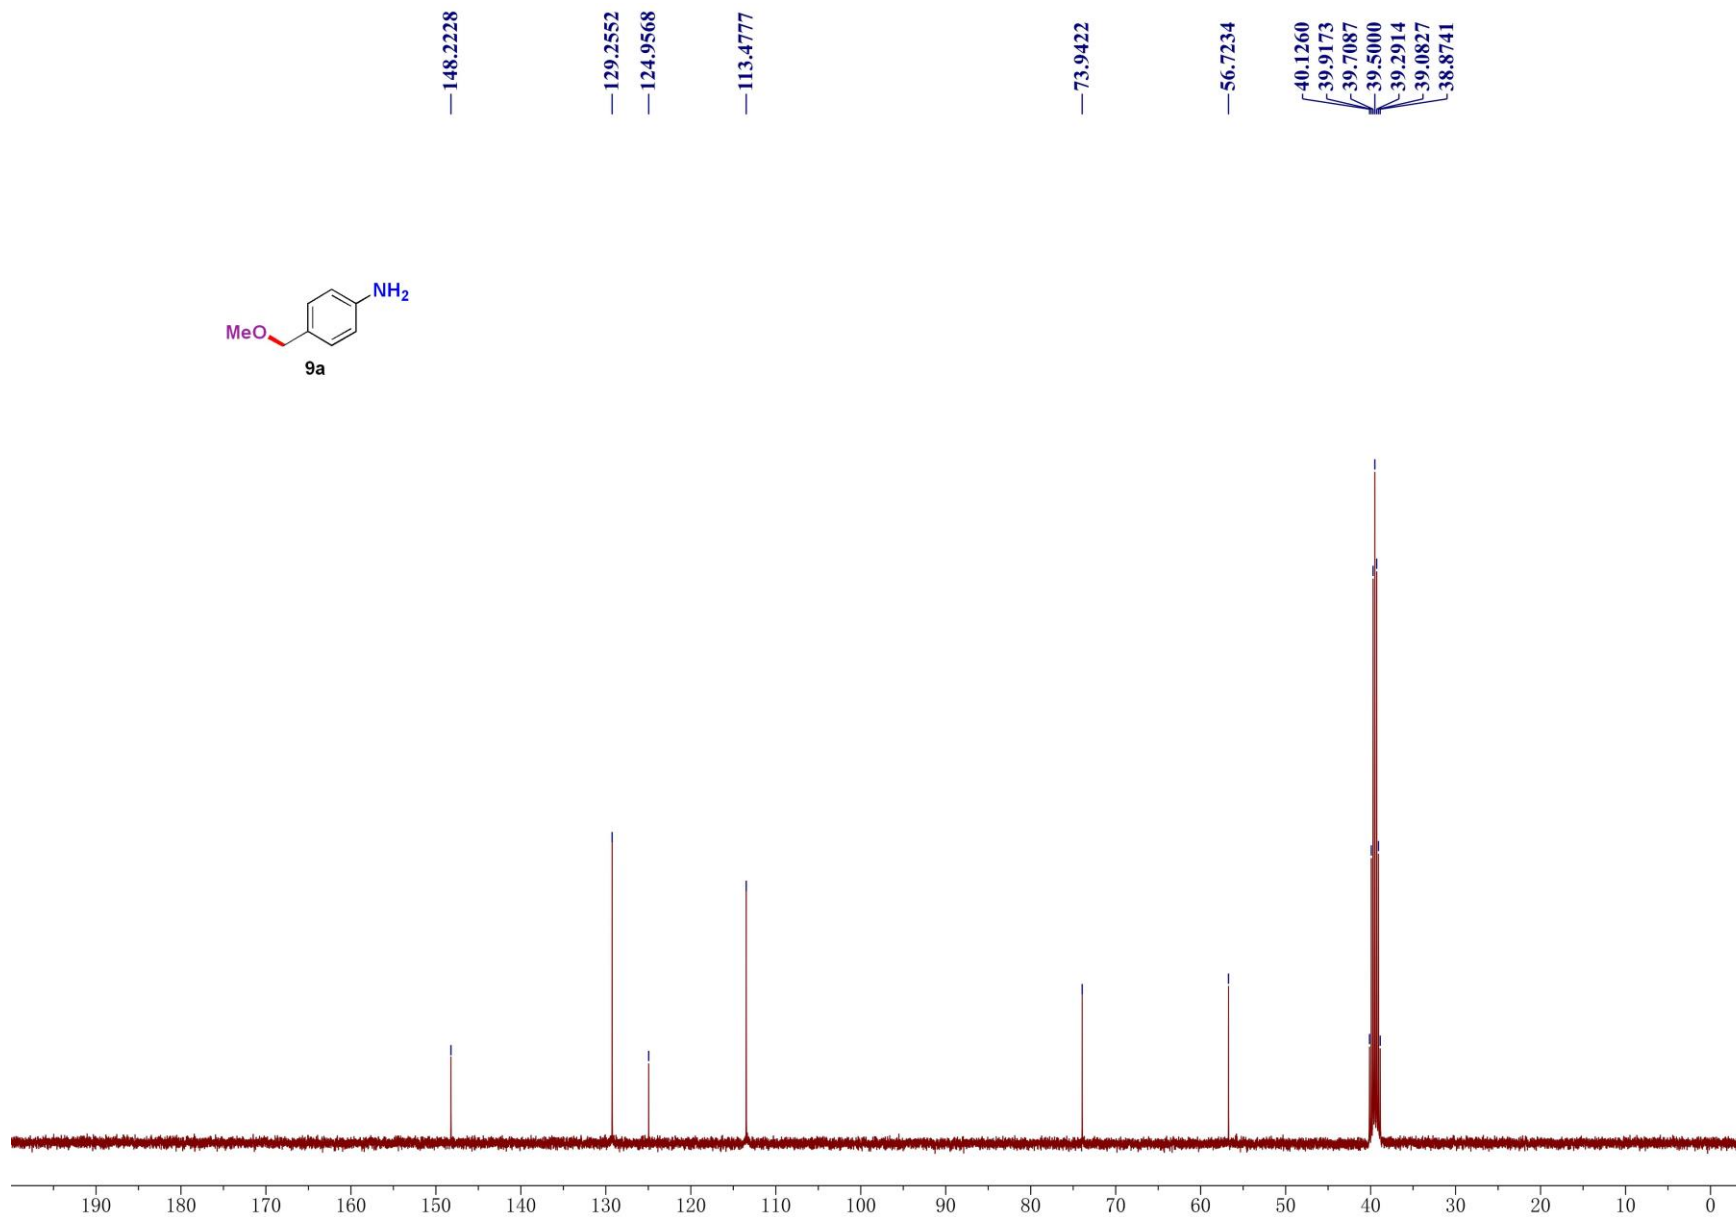

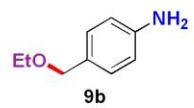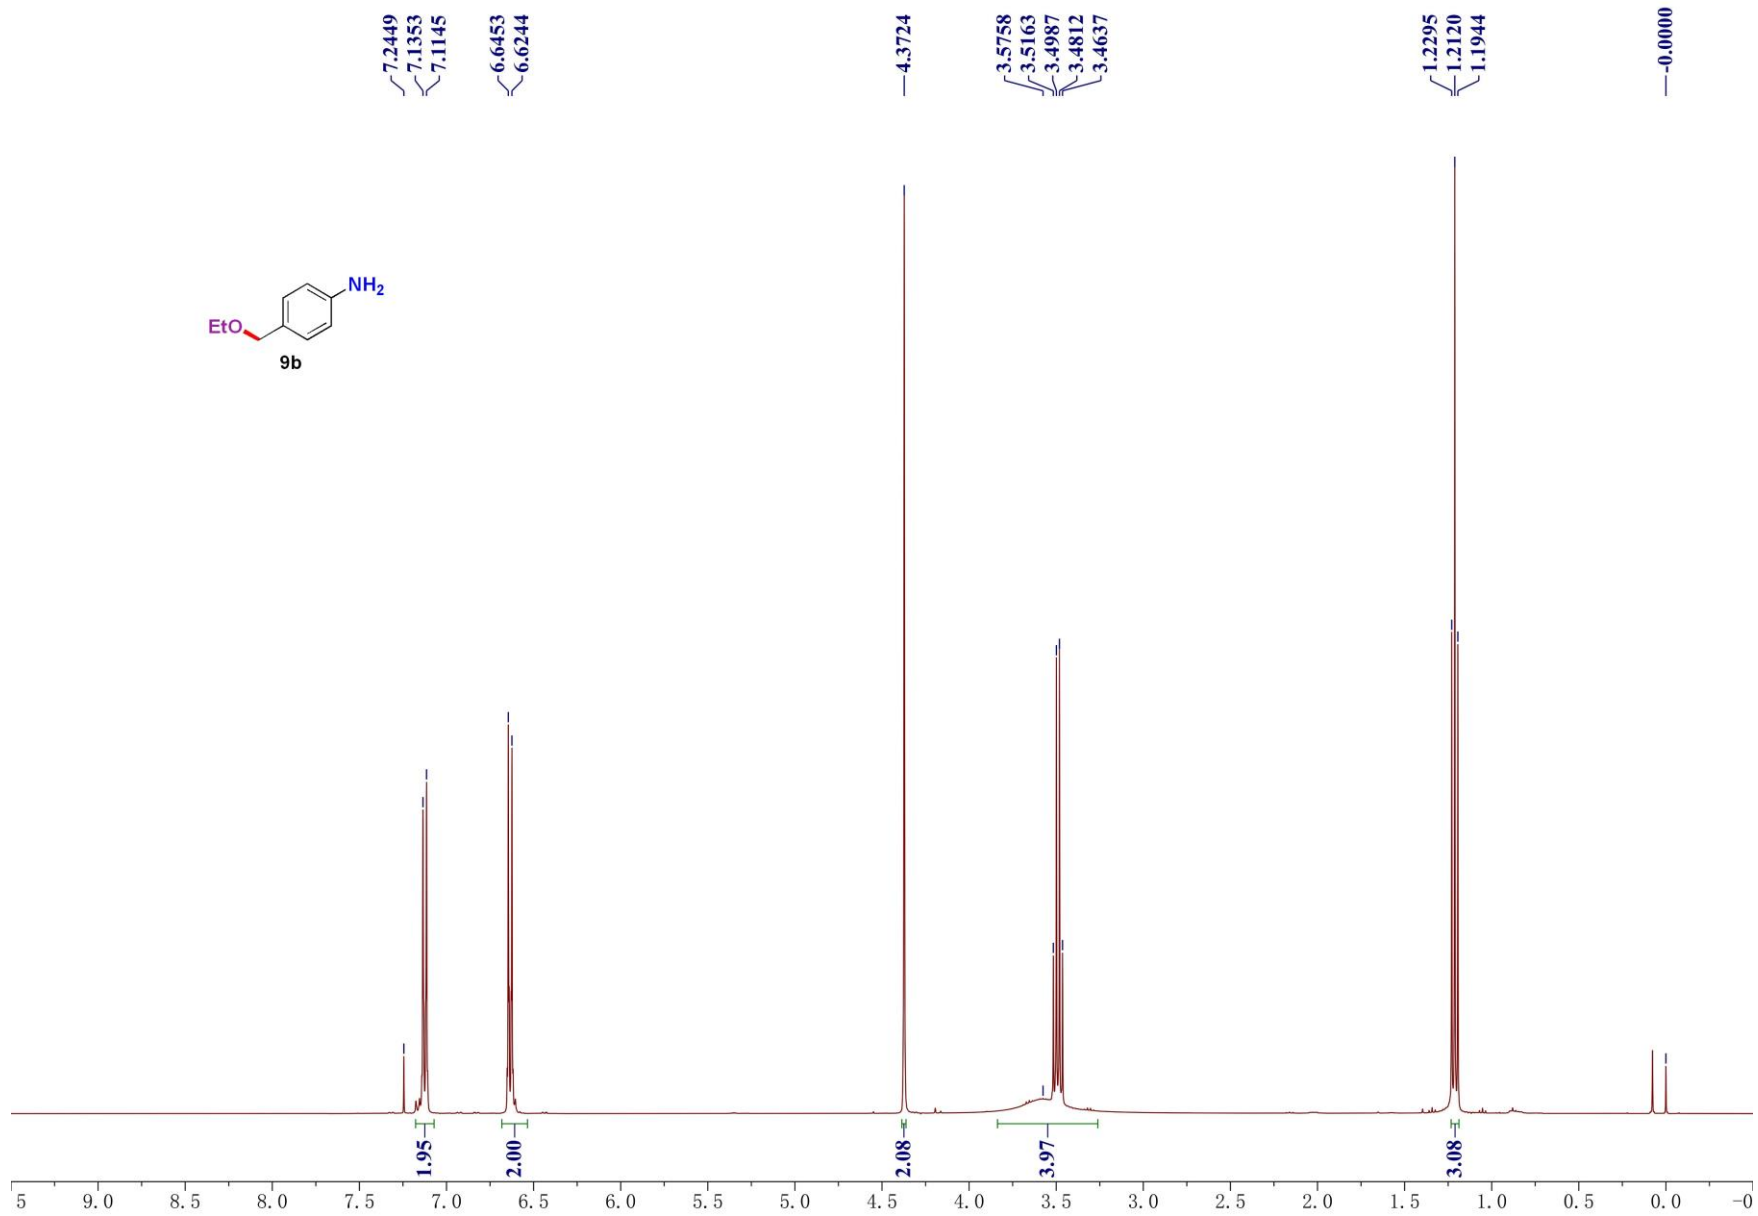

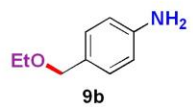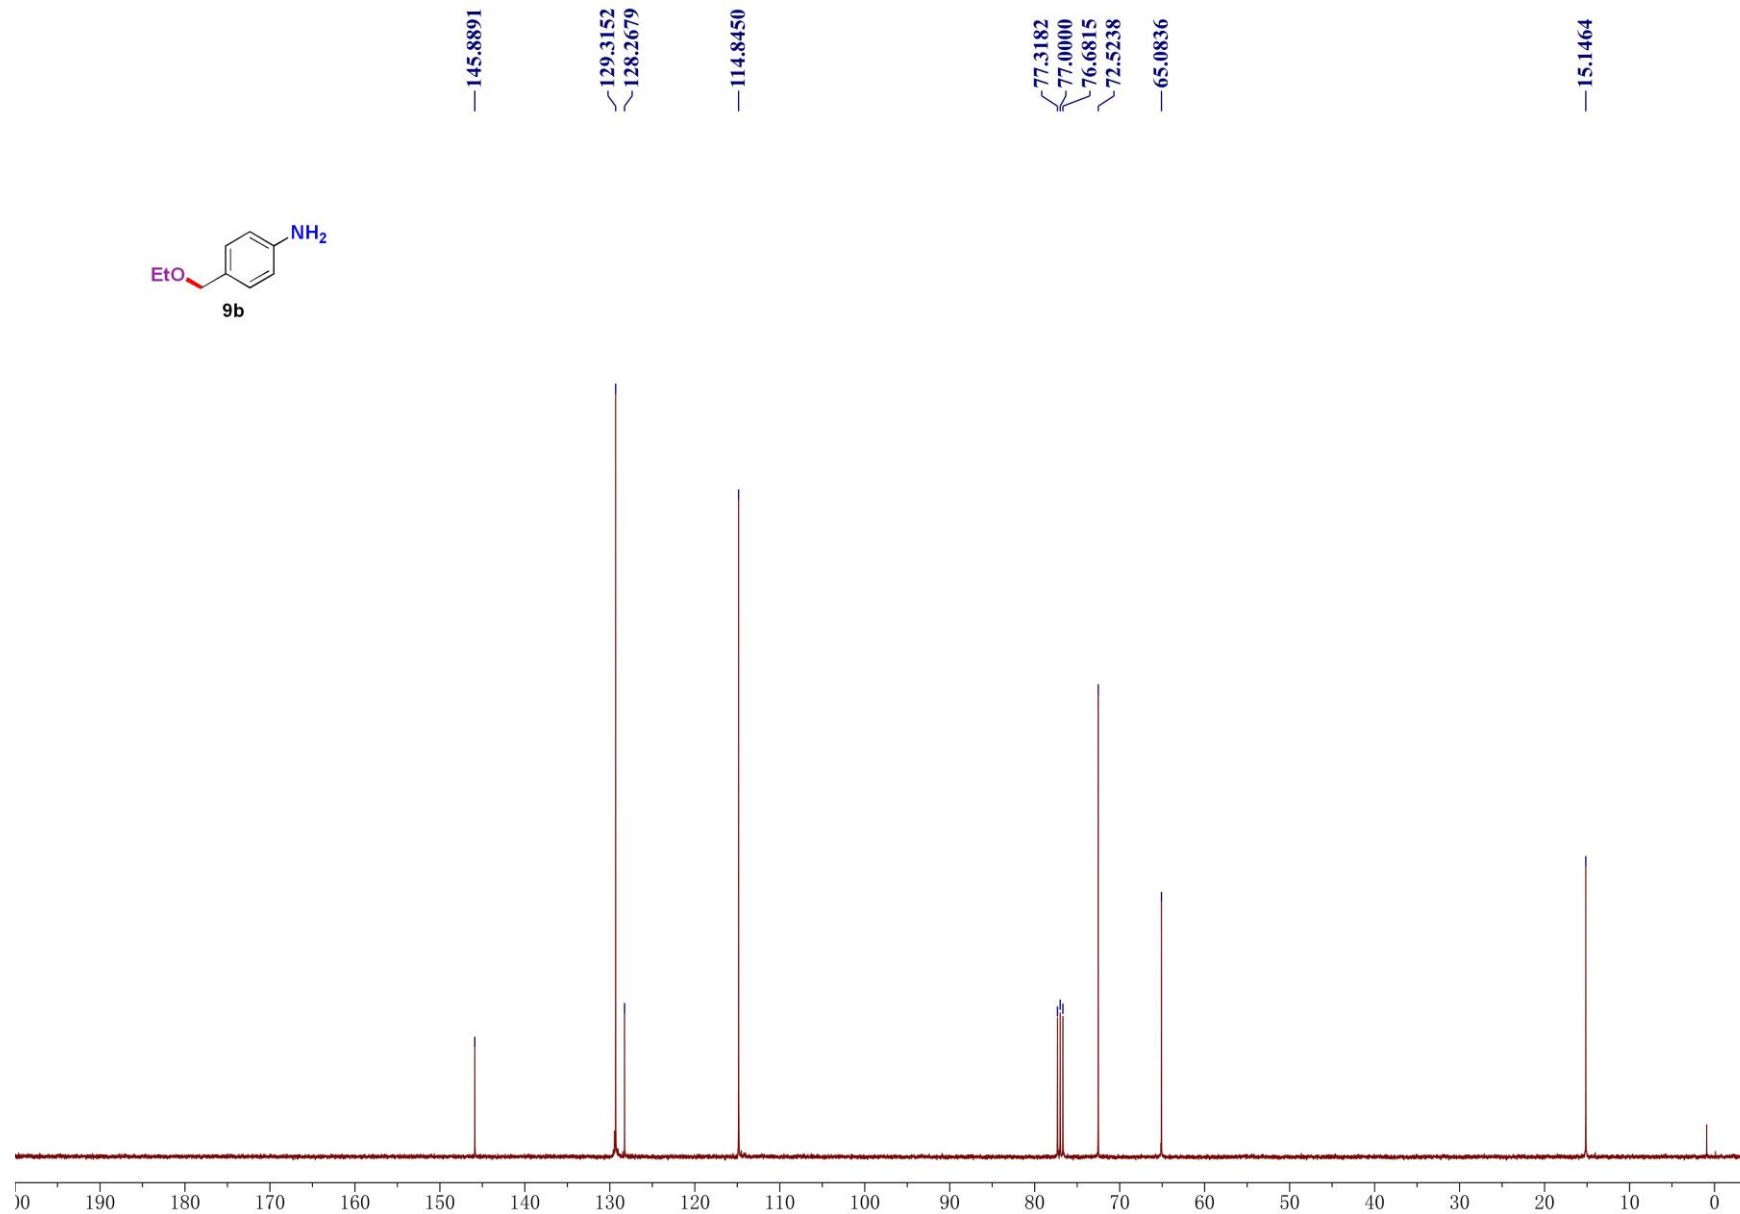

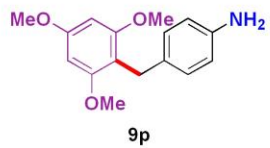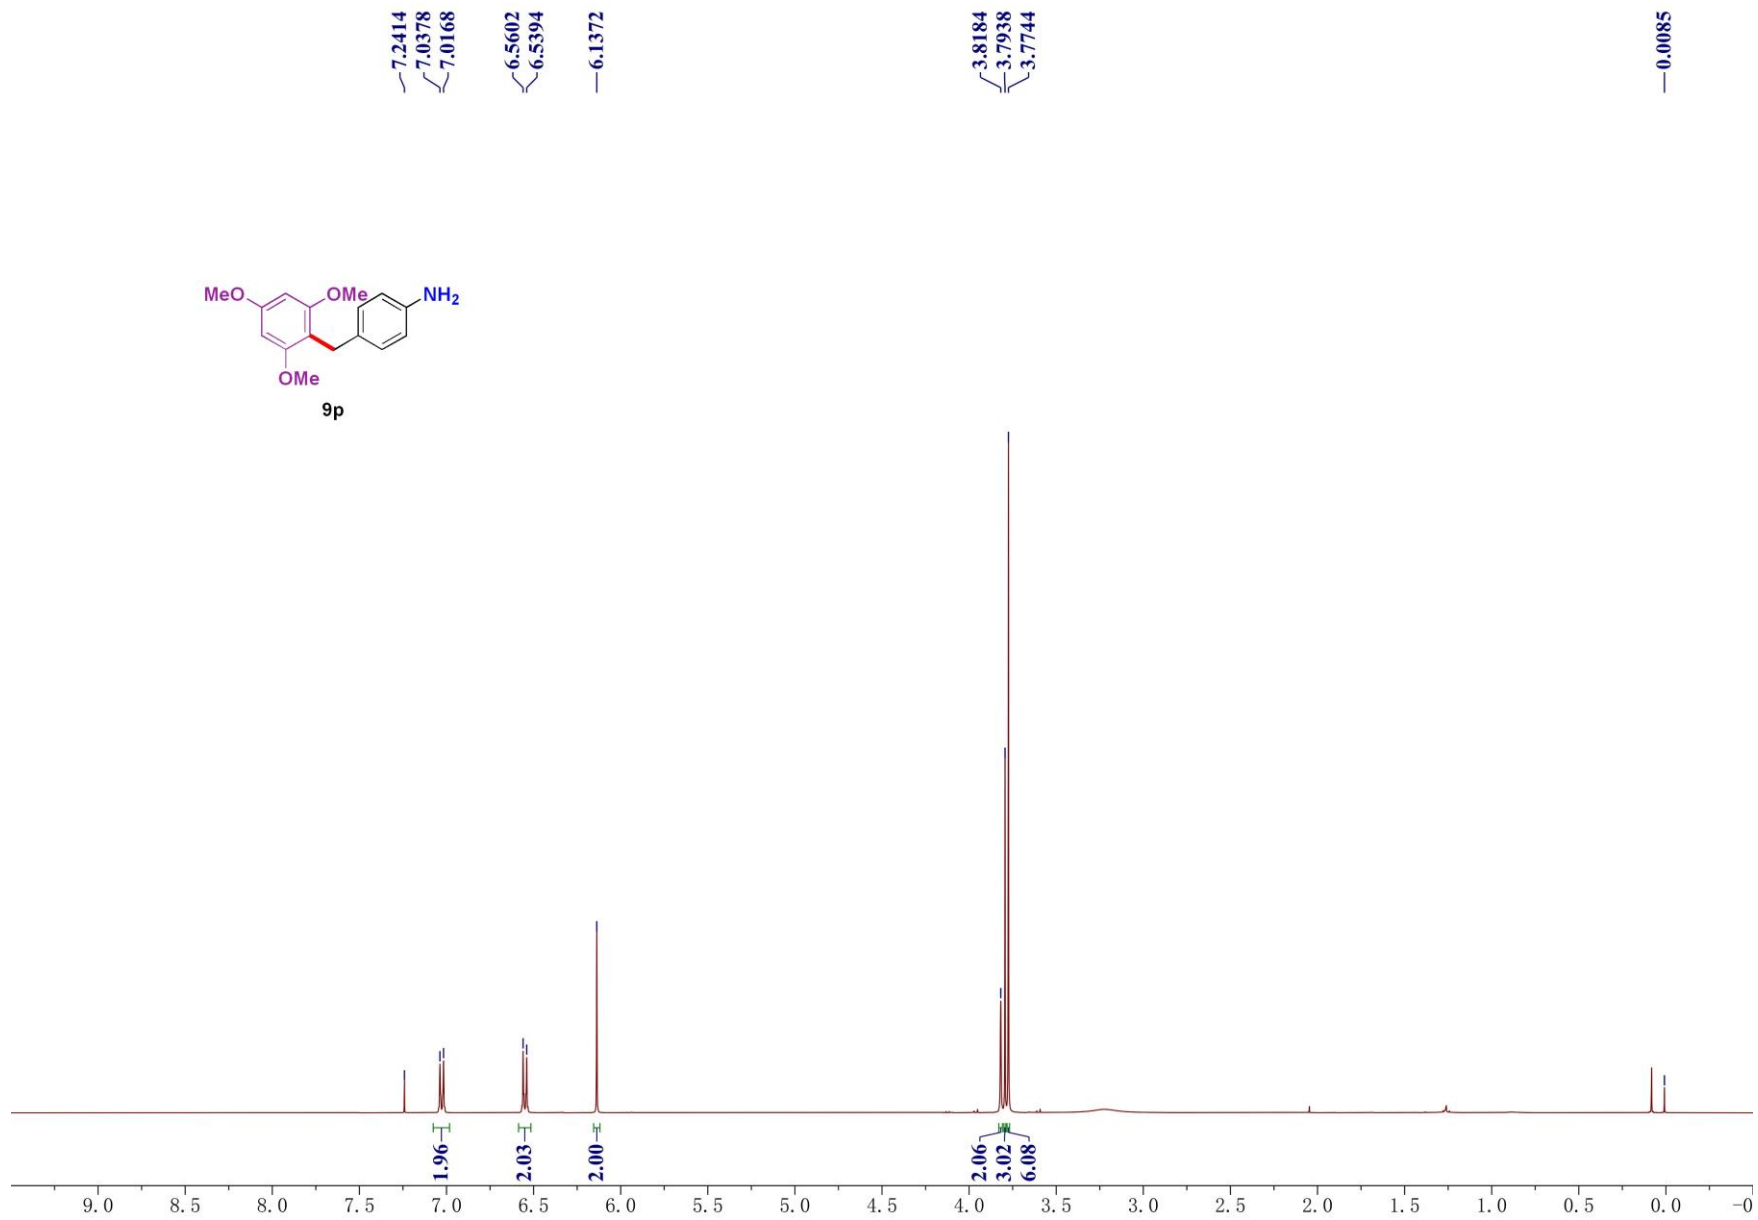

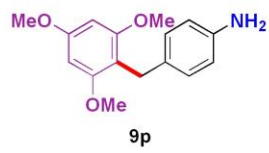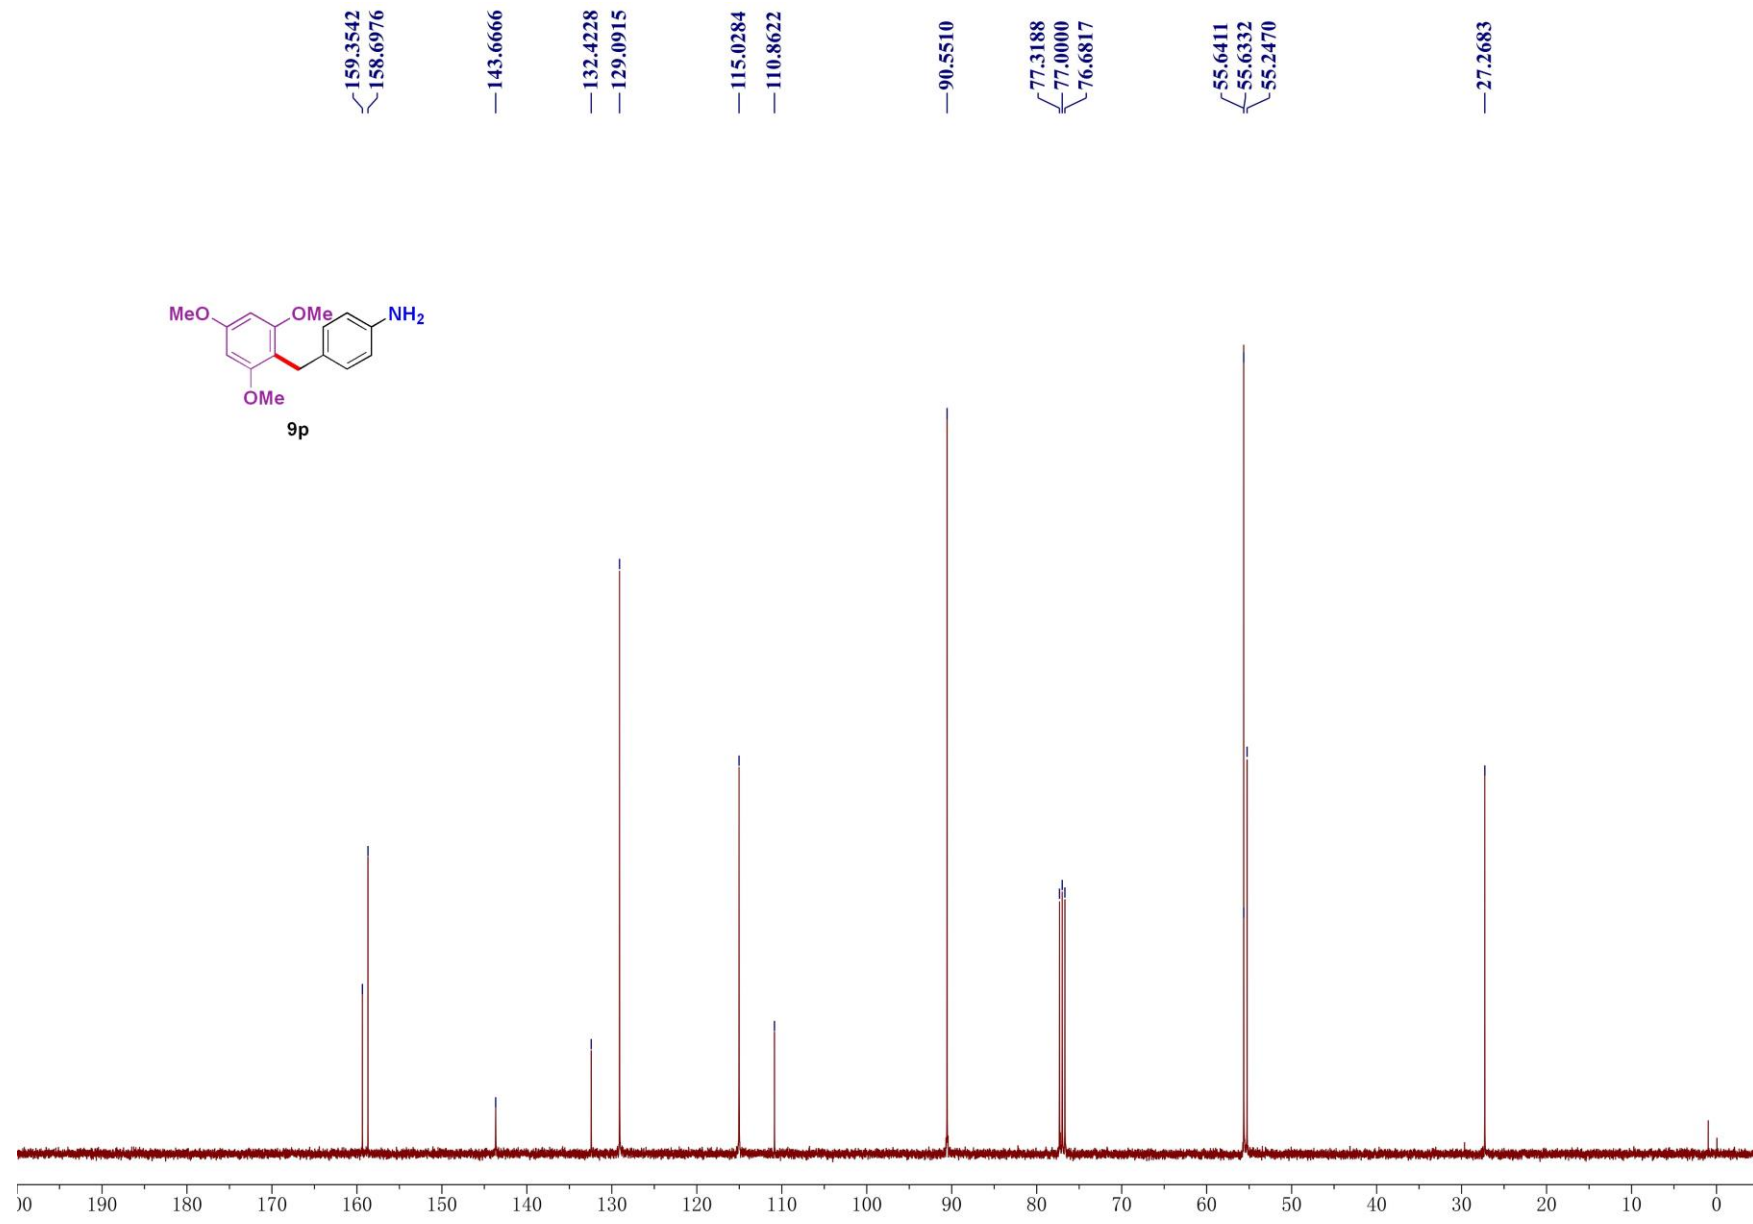

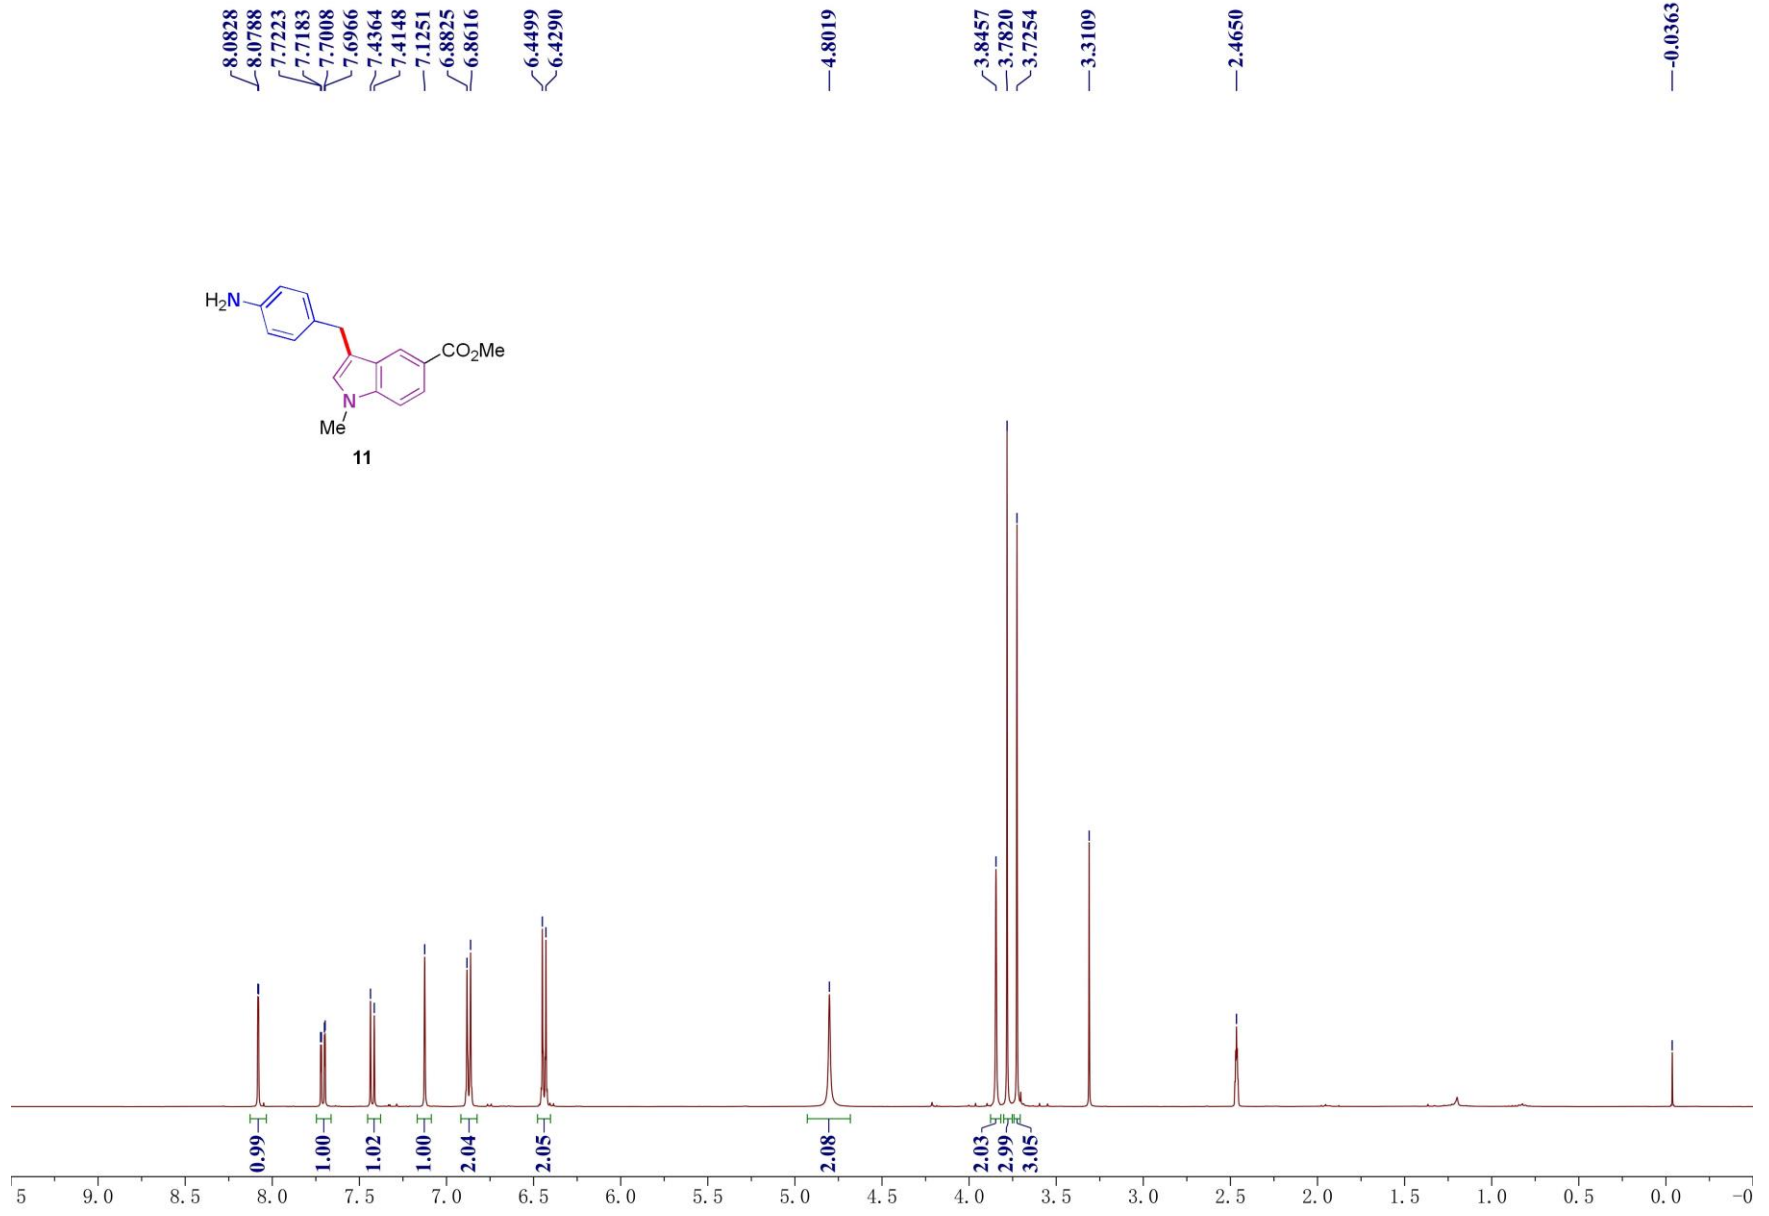



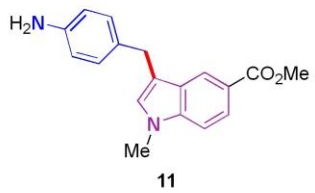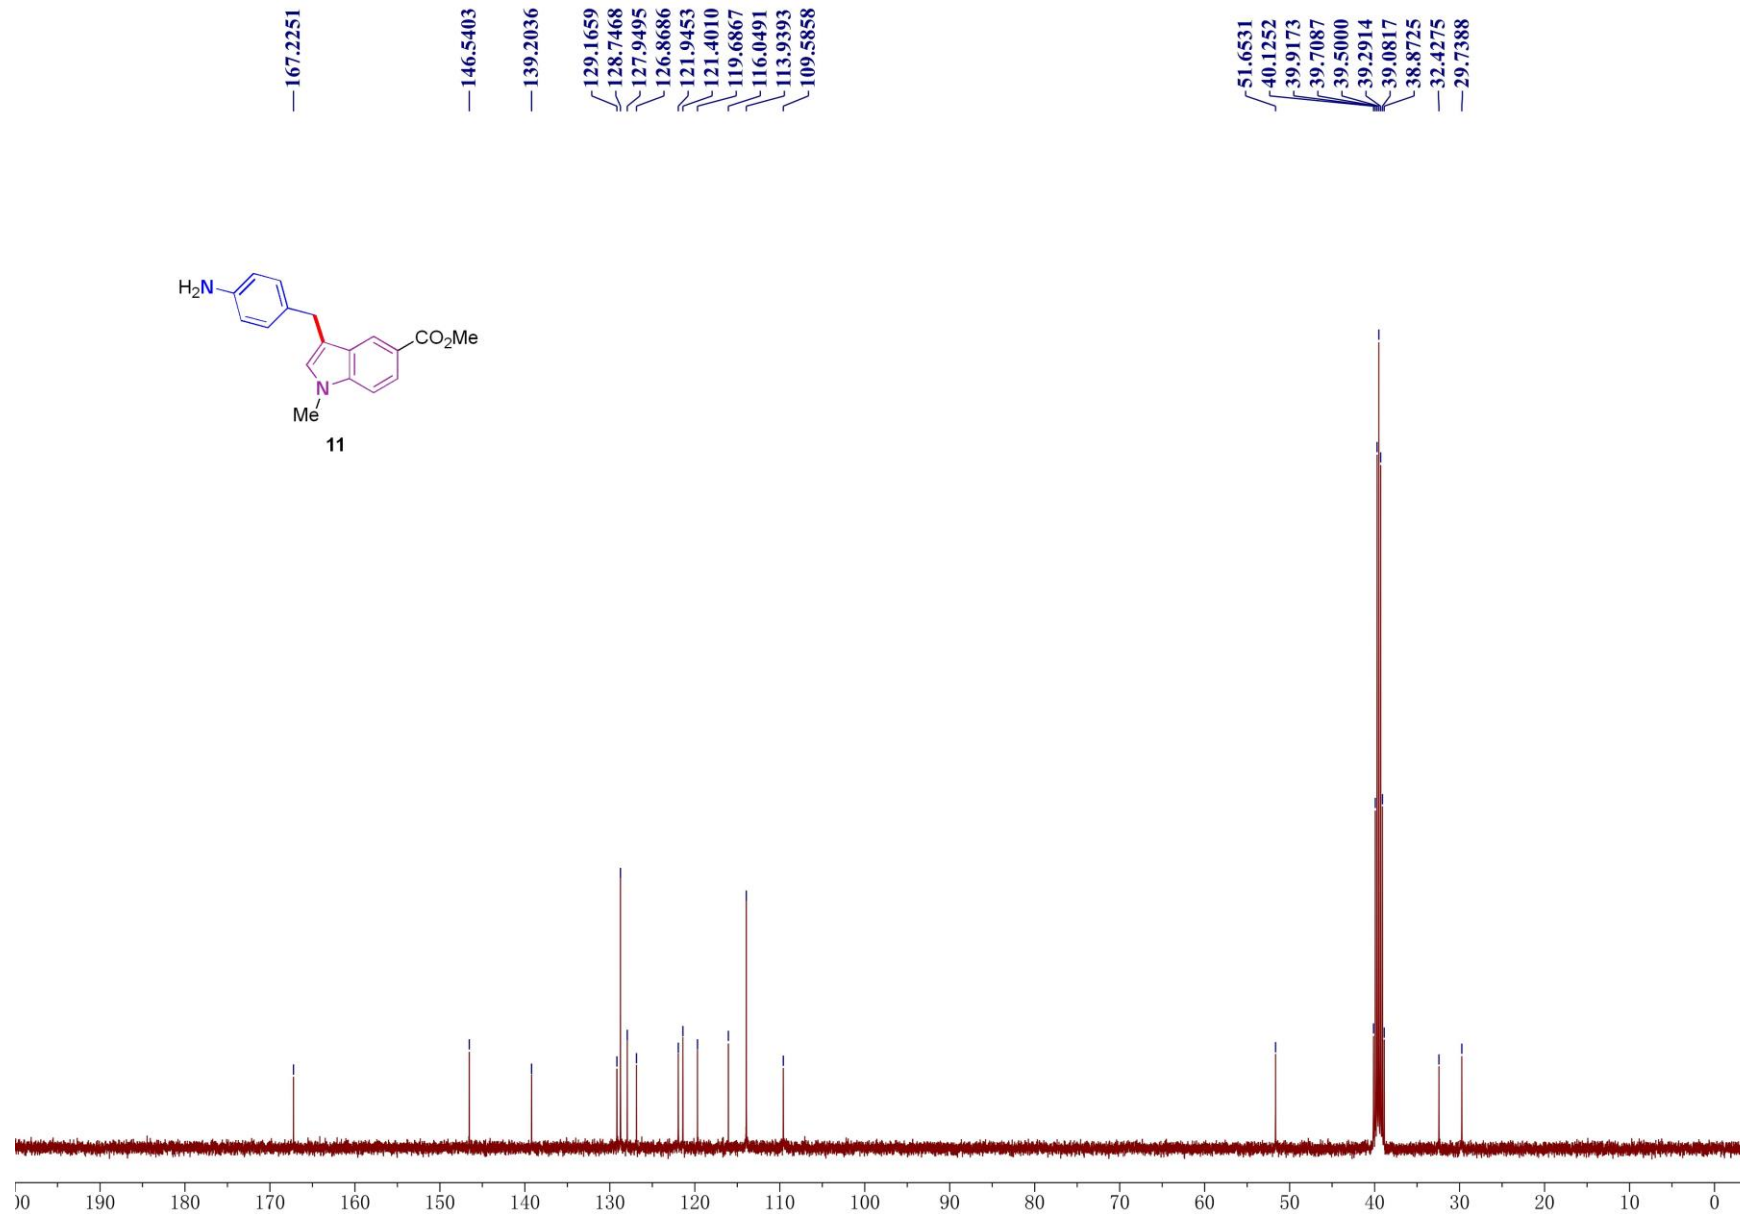

Supplement: d1qo00340b1.pdf [file d1qo00340b1.pdf]
